# Supplementary material for: Impact of the implementation of carbon emission trading on corporate financial performance: Evidence from listed companies in China
Source: PLoS One. 2021 Jul 1;16(7):e0253460. doi: 10.1371/journal.pone.0253460 (PMC8248631; doi:10.1371/journal.pone.0253460)
Supplement: S1 Data — (XLSX) [file pone.0253460.s001.xlsx]

## Sheet: Sheet1
time	treated	time*treated	tobinsq	lev	size_st	roa_w	tobinsq_w	current	cash	qycs	roa	roe	size	A001100000	A0i1224000	A001218000	A001219000	A001000000	A0d2101101	A002100000	A002000000	B001100000	B001101000	B001200000	B001201000	B001209000	B001210000	B001211000	B001000000	B002100000	B002000000	F080601A	F081001B	F081101B	F081201B	F081601B	Indcd	F010101A	F011201A	F050101B	F050501B	F040101B	F041701B	F032801B	Y0301b	Y0401b	Y0501b	Y0601b	Y0701b
0	0	0	0.06192	0.965431	0.60495	0.001485	0.15067	0	0	28.9279	0.001485	0.041761	470000000000			113900000		474400000000			458000000000											0.345779	-3.304	-3.36538	-3.33768	-0.035095	J66		0.965431		0.037439	1.11401	0.028588	0.225299	2	295216	3	10381
0	0	0	0.128748	0.965177	0.768222	0.009472	0.15067	0	0	28.7163	0.009472	0.272887	590000000000			156800000		587800000000			567300000000											0.238957	0.050737	0.024037	0.017293	0.092666	J66		0.965177		0.245766	2.46324	0.024317	0.187352	2	230571	2	11308
0	0	0	0.075671	0.954349	0.968974	0.009557	0.15067	0	0	21.9055	0.009557	0.234177	730000000000			191600000		727200000000			694000000000											0.237144	-0.088748	-0.073724	-0.087304	0.081548	J66		0.954349		0.189286	1.8352	0.02415	0.214329	2	352655	2	12203	126
0	0	0	0.063483	0.926971	1.73366	0.010467	0.15067	0	0	13.6931	0.010467	0.191392	1300000000000			5990000000		1258000000000			1183000000000											0.730149	-0.122096	-0.136203	-0.120756	0.037614	J66		0.940087		0.13784	6.33682	0.023119	0.216255	2	272946	2	13778
0	0	0	0.051089	0.947216	2.23535	0.009433	0.15067	0	0	18.9453	0.009433	0.168696	1600000000000	0	0	5878000000	0	1607000000000	0	0	1522000000000											0.276877	-0.089633	-0.087054	-0.075522	0.032993	J66		0.947216	0.00841	0.159328	2.54943	0.024221	0.230195	2	263477	2	24251
0	0	0	0.053082	0.940752	2.64608	0.008708	0.15067	0	0	16.8783	0.008708	0.154724	1900000000000	0	0	5463000000	0	1892000000000	0	0	1780000000000											0.177527	-0.151261	-0.150392	-0.141326	0.083487	J66		0.940752	0.008051	0.135893	3.73755	0.027115	0.23997	2	298070	2	34724
1	0	0	0.082769	0.940109	3.07052	0.009711	0.15067	0	0	16.697	0.009711	0.162959	2200000000000	0	0	5293000000	0	2186000000000	0	0	2056000000000											0.155792	-0.269299	-0.266038	-0.262726	0.016086	J66		0.940109	0.009057	0.151219	3.62675	0.032307	0.244025	2	275838	2	35069	94
1	0	0	0.068429	0.935584	3.53237	0.009317	0.15067	0	0	15.5241	0.009317	0.14953	2500000000000	0	0	4961000000	0	2507000000000	0	0	2346000000000											0.146671	-0.329813	-0.307338	-0.304553	0.021824	J66		0.935584	0.008721	0.135387	3.38988	0.036976	0.242009	2	332918	2	37937	93
1	0	0	0.052905	0.931547	4.17508	0.008277	0.15067	0	0	14.6086	0.008277	0.124283	3000000000000			4771000000		2953000000000			2751000000000	104400000000		77940000000					29940000000	7336000000	22600000000	0.178005	-0.396297	-0.360576	-0.376088	-0.019689	J66		0.931547		0.111782	4.0209	0.035354	0.245064	2	350142	2	36885	89
1	0	0	0.0703	0.931644	4.59998	0.007478	0.15067	0	0	14.6292	0.007478	0.109324	3200000000000			4701000000		3248000000000			3026000000000	104900000000		75560000000					30160000000	6968000000	23190000000	0.099897	-0.388392	-0.386623	-0.387834	0.020611	J66		0.931644		0.10443	4.05467	0.032283	0.231057	2	343994	2	32502	89
0	0	0	0.581806	0.674441	0.0934027	0.042309	0.581806	1.75755	0.309483	3.07164	0.042309	0.127577	120000000000	113500000000		0		119200000000		64550000000	80420000000											0.19124	5.121	5.08776	5.04956	2.48973	K70	1.75755	0.674441	0.044425	0.119527	0.022511	0.343785	0.266109	2	1089320	2	16515	0
0	0	0	0.842312	0.526484	0.119861	0.050069	0.842312	4.40359	0.968712	2.11186	0.050069	0.152683	140000000000	130300000000		81966326		137600000000		68060000000	92200000000											0.15408	3.84423	3.35839	3.40241	1.4999	K70	1.91488	0.670017	0.050896	0.141604	0.01459	0.355218	0.253837	2	1487388	2	17616
0	0	0	0.41882	0.746861	0.232235	0.050048	0.41882	1.58519	0.270704	3.9504	0.050048	0.176802	220000000000	205500000000		374000000		215600000000		129700000000	161100000000											0.567036	6.54178	6.52019	6.73932	4.04683	K70	1.58519	0.746861	0.043331	0.161939	0.031432	0.235181	0.259711		1144654		22850
0	0	0	0.271764	0.615285	0.348268	0.045325	0.271764	1.83864	0.285285	2.59933	0.045325	0.189507	300000000000	282600000000		435500000		296200000000		200700000000	228400000000											0.37364	7.77604	7.47446	7.57242	3.55757	K70	1.40813	0.770997	0.040881	0.171004	0.021103	0.242339	0.266121	2	948934	2	27951
0	0	0	0.293857	0.783163	0.467216	0.046407	0.293857	1.39618	0.196742	4.61176	0.046407	0.208875	380000000000	362800000000	0	426800000	0	378800000000	0	259800000000	296700000000											0.278835	4.90827	5.09462	5.00771	2.69927	K70	1.39618	0.783163	0.043367	0.190686	0.018295	0.272217	0.256647	2	767659	3	31019
0	0	0	0.188647	0.77997	0.611812	0.042651	0.188647	1.34393	0.130743	4.54484	0.042651	0.195093	480000000000	442000000000	0	430100000	0	479200000000	0	328900000000	373800000000											0.265056	4.05331	3.98321	3.98763	2.26917	K70	1.34393	0.77997	0.040044	0.173536	0.022737	0.28259	0.246736	2	741806	3	35330
1	0	0	0.301768	0.772046	0.653871	0.039059	0.301768	1.34471	0.178367	4.38686	0.039059	0.174285	510000000000	464800000000	0	877500000	0	508400000000	0	345700000000	392500000000											0.060941	4.53014	4.6942	4.70878	2.7537	K70	1.34471	0.772046	0.039198	0.166424	0.012939	0.287934	0.236209	2	496922	2	40647
1	0	0	0.44167	0.777015	0.802044	0.046351	0.44167	1.30225	0.12319	4.48461	0.046351	0.205782	610000000000	547000000000	0	1045000000	0	611300000000	0	420100000000	475000000000											0.20237	4.96943	4.73196	4.71401	2.95347	K70	1.30225	0.777015	0.043231	0.190371	0.012839	0.319893	0.232325	2	272370	2	42295
1	0	0	0.273097	0.805367	1.11798	0.039322	0.273097	1.24362	0.137052	5.13788	0.039322	0.190279	830000000000	721300000000		1260000000		830700000000		580000000000	669000000000	240500000000	240500000000	206500000000	169700000000	5161000000	6801000000	1592000000	39250000000	10900000000	28350000000	0.358875	3.06614	2.89452	2.94997	1.92058	K70	1.24362	0.805367	0.036046	0.175352	0.00863	0.289496	0.277767	2	336092	2	58280
1	0	0	0.294227	0.839813	1.59997	0.037283	0.294227	1.20086	0.193928	6.24269	0.037283	0.213626	1200000000000	1018000000000		1438000000		1165000000000		847400000000	978700000000	242900000000	242900000000	198300000000	160100000000	6262000000	8866000000	2075000000	51140000000	13930000000	37210000000	0.402893	3.70068	3.27445	3.28767	1.66011	K70	1.20086	0.839813	0.03371	0.199323	0.005899	0.208433	0.272449	2	207215	2	77708
0	0	0	1.78152	0.491793	-0.0780754	-0.050439	1.78152	1.31635	0.454313	1.9677	-0.068028	-0.125463	170000000	94682378		13179888	0	167800000		71928140	82528140											-0.011848	3.64476	3.87773	3.73855	-0.085216	G54	1.31635	0.491793	-0.060946	-0.134661	0.115329	0.258117	-0.108304	2	9790	2	288	0
0	0	0	5.48845	0.461532	-0.0780518	0.097419	5.48845	0.571187	0.022728	1.85712	0.097419	0.18446	180000000	99498184		12070393	0	184200000		54203184	55003184											-0.200825	-0.742508	-0.918447	-0.910888	-0.610821	C27	1.83565	0.298574	0.10746	0.156337	0.032715	0.712908	0.180002		9389		277
0	0	0	3.46076	0.294935	-0.0780343	0.048318	3.46076	1.92192	1.00053	1.41831	0.048318	0.068701	200000000	109700000		11353345	0	196300000		57097900	57897900											0.065616	1.94732	1.60725	1.68274	0.136697	C27	1.92192	0.294935	0.043412	0.066419	0.060941	0.379526	0.258008		11596		322
0	0	0	3.56081	0.232528	-0.0780392	0.040153	3.56081	3.02058	1.27626	1.30298	0.040153	0.054556	190000000	133100000	0	10620298	0	192900000	0	44057731	44857731											-0.017287	1.01165	0.712983	1.88579	2.15246	C27	3.02058	0.232528	0.037617	0.052779	0.083492	0.504699	0.270207	1	12730	3	277
0	0	0	4.04014	0.403239	-0.0779683	0.026648	4.04014	2.32833	0.754484	1.67571	0.026648	0.039627	240000000	174300000	0	12243288	0	242200000	0	74845264	97645264											0.255236	-1.50807	-0.781028	-0.702606	0.080396	C27	2.32833	0.403239	0.020546	0.040114	0.05167	0.300574	0.482572	1	11817	3	243	0
1	0	0	3.86516	0.534754	-0.0778299	0.053838	3.86516	1.75933	0.2661	2.1494	0.053838	0.103513	340000000	264100000	0	21181936	0	338300000	0	150100000	180900000											0.396984	26.1097	15.9557	3.45829	0.533648	C27	1.75933	0.534754	0.044024	0.099278	0.034017	0.238288	0.243929	1	12670	3	220	0
1	0	0	9.66839	0.590402	-0.0777429	0.018609	9.66839	1.59611	0.251821	2.44142	0.018609	0.042766	400000000	326500000	0	32331233	0	398700000	0	204600000	235400000											0.178522	-1.19297	-0.759946	-0.721489	0.075325	C27	1.59611	0.590402	0.016592	0.041992	0.014333	0.302138	0.365584	2	11103	3	208	0
1	0	0	16.8542	0.203456	-0.0779949	0.127625	12.9916	3.65746	2.61076	1.25542	0.127625	0.232602	220000000	134200000		24388896		223700000		36700971	45516491	287700000	287700000	262600000	188100000	12021277	27328272	2606891	46185673	6.46936e+06	39716316	-0.438848	0.098304	-0.185569	0.076061	-0.392617	C27	3.65746	0.203456	0.189182	0.222875	0.005931	1.28587	0.140073	2	10140	2	179	0
1	0	0	6.99066	0.315247	-0.0779299	0.023925	6.99066	2.06898	1.42404	1.46038	0.023925	0.032528	270000000	145400000		23747065		268800000		70290412	84752252	138600000	138600000	143900000	52751672	74382699	14877343	-1.2917e+06	9.71643e+06	3.82419e+06	5.89224e+06	0.20172	-6.74954	-8.30108	-8.02982	0.62091	C27	2.06899	0.315247	0.017112	0.032007	0.068227	0.515562	0.39358	2	12191	2	172	1
0	0	0	1.63247	0.561649	-0.0763166	0.007378	1.63247	0.867579	0.003771	2.28128	0.007378	0.013978	1400000000	279900000		0	0	1389000000		636500000	637100000											-0.06656	-0.958942	0.378074	-8.21844	-0.476429	S90	0.439712	0.458645	0.03889	0.013963	0.158799	0.078271	0.380005	2	126854	3	684	0
0	0	0	4.17243	0.601704	-0.0764172	-0.036127	4.17243	0.783888	0.027806	2.5107	-0.036127	-0.067274	1300000000	188900000		0	0	1319000000		616200000	616800000											-0.050271	2.89216	2.17189	5.2562	-0.41543	S90	0.306633	0.467575	-0.014282	-0.069649	0.034827	0.032741	-0.163757		151025		712	0
0	0	0	2.59399	0.47796	-0.0764541	-0.003388	2.59399	0.36446	0.020899	1.91556	-0.003388	-0.006426	1300000000	224000000		0	0	1294000000		614600000	618300000											-0.019402	-3.10128	-2.91151	-2.58862	7.8969	S90	0.36446	0.47796	0.017148	-0.006555	0.078874	0.106086	0.310759		134139		671	0
0	0	0	2.05771	0.483142	-0.0764165	0.017069	2.05771	0.55439	0.020573	1.93477	0.017069	0.032818	1300000000	353300000	0	0	0	1320000000	0	637300000	637600000											0.046896	1.23112	1.51292	-4.04838	2.23878	K70	0.55439	0.483142	0.035509	0.032285	1.41235	0.075336	0.168804	1	119361	1	382	0
0	0	0	1.92304	0.474831	-0.0766052	-0.033763	1.92304	0.462402	0.018535	1.90415	-0.033763	-0.064829	1200000000	260800000	0	0	0	1189000000	0	564100000	564400000											-0.099302	1.03946	1.03946	1.38218	1.01552	K70	0.462402	0.474831	-0.02919	-0.067834	0.035242	0.043799	0	1	110257	3	376	0
1	0	0	2.74301	0.509964	-0.0763488	0.033784	2.74301	0.378206	0.02339	2.04066	0.033784	0.066716	1400000000	244600000	0	0	0	1367000000	0	646700000	696900000											0.149758	-12.1637	-13.8296	-14.1628	0.412305	K70	0.378206	0.509964	0.046405	0.064451	0.034784	0.038617	0.206151	1	111461	1	421	0
1	0	0	4.84397	0.44704	-0.0751573	-0.030349	4.84397	0.832298	0.136521	1.80845	-0.030349	-0.057392	2200000000	775000000	0	37658203	0	2194000000	0	931200000	980800000											0.605376	2.63981	2.51135	3.26762	3.05084	K70	0.832298	0.44704	-0.019483	-0.044537	0.880553	0.038343	-0.016059	2	177194	2	535	0
1	0	0	2.83144	0.463708	-0.0746774	0.049547	2.83144	0.808671	0.031856	1.86466	0.049547	0.091073	2500000000	939800000		37407768		2527000000		1162000000	1172000000	481900000	481900000	481300000	336500000	14435164	92569957	22065242	126800000	9.80217e+06	117000000	0.15188	-3.3688	-2.66346	-2.43583	-0.181743	N77	0.808671	0.463708	0.055012	0.086298	0.335796	0.190668	0.077326	2	135792	2	618	1
1	0	0	1.50487	0.517747	-0.0741232	0.008433	1.50487	0.860647	0.03594	2.0736	0.008433	0.016622	2900000000	1183000000		33242750		2912000000		1375000000	1508000000	530900000	530900000	549300000	346400000	16377965	105300000	45026483	57958607	35022615	22935992	0.152287	7.53653	8.43811	11.3899	0.958765	N77	0.860647	0.517747	0.023338	0.016332	0.363648	0.182316	0.604269	1	131588	2	705	0
0	0	0	0.422264	0.716675	-0.0697893	0.026147	0.422264	1.73836	0.052438	3.52952	0.026147	0.086478	5900000000	5164000000		0	0	5921000000		2971000000	4244000000											0.063395	217.228	141.426	162.639	0.885095	K70	1.73836	0.716675	0.037885	0.089534	0.000558	0.17255	0.070305	2	70323	2	177	0
0	0	0	0.790204	0.702148	-0.0678442	0.050816	0.790204	3.54601	0.211182	3.35737	0.050816	0.173258	7300000000	6244000000		0	0	7272000000		1415000000	5080000000											0.228084	1.4738	1.31803	4.23378	7.37763	K70	4.41334	0.698577	0.058967	0.152933	0	0.254294	0.170847	2	65182	2	250	0
0	0	0	0.618863	0.712244	-0.0659774	0.062684	0.618863	1.61344	0.31097	3.47517	0.062684	0.209026	8600000000	7628000000		0	0	8568000000		3749000000	6010000000											0.178255	10.3706	10.521	10.2588	3.26523	K70	2.03483	0.701421	0.069206	0.194059	0	0.272952	0.217822		72966		726	0
0	0	0	0.487256	0.599428	-0.0663321	0.051404	0.487256	1.17022	0.070871	2.49643	0.051404	0.159389	8300000000	7025000000		21641990	0	8322000000		5045000000	5433000000											-0.028749	0.103038	0.18979	0.190799	0.341916	K70	1.39267	0.652855	0.058987	0.150269	0	0.311137	0.230637		62505		283	0
0	0	0	0.681148	0.620165	-0.0648611	0.071277	0.681148	1.70772	0.404747	2.63272	0.071277	0.195581	9300000000	7727000000	0	21087067	0	9343000000	0	4525000000	5794000000											0.122742	2.59459	2.64937	2.64005	1.03996	K70	1.70772	0.620165	0.068157	0.177394	0.004335	0.329242	0.255115	2	60234	2	290
0	0	0	0.667673	0.579972	-0.0639614	0.072289	0.667673	2.50162	0.651563	2.38079	0.072289	0.18046	10000000000	7703000000	0	20532144	0	9968000000	0	3079000000	5781000000											0.066863	2.77565	2.73219	2.83209	5.75093	K70	2.50162	0.579972	0.073495	0.166712	0.003795	0.462558	0.246434	2	47038	2	296	0
1	0	0	0.809775	0.64142	-0.0613906	0.047184	0.809775	1.75296	0.232422	2.78878	0.047184	0.121993	12000000000	9474000000	0	0	0	11750000000	0	5404000000	7539000000											0.167321	0.444694	0.484331	0.48926	9.60123	K70	1.75296	0.64142	0.053717	0.121594	0.006881	0.198135	0.252061	2	52720	2	329	0
1	0	0	1.22316	0.646151	-0.060022	0.035883	1.22316	2.45883	0.406895	2.82606	0.035883	0.100759	13000000000	10470000000	0	0	0	12700000000	0	4258000000	8208000000											0.080853	6.86763	7.0702	7.01803	3.76894	K70	2.45883	0.646151	0.052628	0.097614	0.004077	0.287662	0.260206	2	77633	2	352	0
1	0	0	0.968647	0.610499	-0.0593497	0.062138	0.968647	2.43324	0.593629	2.56739	0.062138	0.167039	13000000000	11080000000		0	0	13170000000		4555000000	8041000000	3359000000	3359000000	2911000000	2381000000	70816701	68807169	152800000	924400000	120500000	803900000	0.036752	48.7782	35.1649	34.7466	6.98913	K70	2.43324	0.610499	0.07264	0.156705	0.002223	0.255029	0.130378	2	84055	2	370	0
0	0	0	0.981393	1.28846	-0.0774376	-0.050439	0.981393	0.39284	0.000313	-3.46674	-0.096462	1.56211	610000000	289300000		155153	0	610700000		631000000	685500000											-0.171643	1.56678	1.63252	1.60799	-0.14892	K70	0.458499	1.12261	-0.025856	0.868214	0.025605	0.260362	-0.003995	1	13218	3	849	0
0	0	0	3.57943	1.25235	-0.0777939	0.041935	3.57943	0.268489	0.00027	-3.96271	0.041935	-0.315795	360000000	109300000		104342	0	363300000		387000000	417700000											-0.405107	-2.33196	-2.28112	5.16506	-0.072851	K70	0.28235	1.1499	0.158793	-0.375008	0.047022	0.366974	0.079041	2	17989	3	799	0
0	0	0	4.75737	1.09853	-0.0778383	0.062384	4.75737	0.291014	0.020218	-10.1491	0.062384	-0.497665	330000000	98205091		70640.9	0	332400000		337500000	365200000											-0.084923	-4.39979	-4.72365	0.983579	0.088691	H61	0.291014	1.09853	0.146701	-0.662523	0.049085	0.431055	0.099068		13673		751	0
0	0	0	4.1934	0.339322	-0.0777951	0.023921	4.1934	0.958854	0.054638	1.5136	0.023921	0.064035	360000000	145800000		43333	0	362400000		70098488	70098488											0.090228	3.46385	4.07561	3081.45	0.09961	H61	2.08054	0.19342	0.036844	0.02843	0.021806	0.456216	0.215393		13603		675	0
0	0	0	4.23218	0.588368	-0.0771798	0.007696	4.23218	1.00274	0.32314	2.42936	0.007696	0.015051	790000000	586900000	0	397166	0	789700000	0	492900000	492900000											1.17894	-1.93277	-1.66265	-1.56039	-0.099303	H61	1.19072	0.624158	0.017025	0.014937	0.185822	0.395939	0.504787	2	12402	3	762
0	0	0	4.87565	0.462754	-0.0773701	0.026024	4.87565	1.38619	0.419691	1.86135	0.026024	0.057937	660000000	421800000	0	336833	0	657500000	0	304300000	304300000											-0.167369	-1.44161	-1.41049	-5.07474	1.8765	H61	1.38619	0.462754	0.04747	0.053307	0.160634	0.325999	0.158627	2	15074	2	674
1	0	0	4.95222	0.474294	-0.0773364	-0.049883	4.95222	1.47646	0.238786	1.9022	-0.049883	-0.093875	680000000	460400000	0	293833	0	680900000	0	311800000	323000000											0.035609	12.8081	11.1314	7.56487	0.762953	H61	1.47646	0.474294	-0.017487	-0.093256	0.28739	0.290925	-0.055648	2	15159	2	606
1	0	0	11.4385	0.223847	-0.0776253	0.0228	11.4385	2.67824	2.03329	1.28841	0.0228	0.036231	480000000	288000000	0	250833	0	480400000	0	107500000	107500000											-0.294541	-7.08893	-7.11914	-0.580481	-0.69217	H61	2.67824	0.223847	0.034566	0.035509	0.313551	0.206013	0.131828	2	22051	2	121	1
1	0	0	11.5086	0.149962	-0.0775763	0.133447	11.5086	3.35761	0.761584	1.17642	0.164	0.201385	510000000	257500000		207833		514400000		76684352	77135641	38860399	38860399	70072949	13138109		49434568	1.42745e+06	90207369	8.63941e+06	81567961	0.070786	5.22063	9.32898	18.5918	-0.037766	H61	3.35761	0.149962	0.161354	0.186555	0.056177	0.07555	0.095773	1	14587	2	155	0
0	0	0	4.12532	0.062781	-0.0782034	0.009469	4.12532	8.73363	7.08085	1.06699	0.009469	0.010165	79000000	43269561		0	0	78914423		4.95436e+06	4.95436e+06											-0.002187	4.84388	5.12158	3.96929	-0.001574	I64	8.73363	0.062781	0.006052	0.010114	0	0.144865	0.184642	1	10811	2	20	0
0	0	0	11.3901	0.076589	-0.0782027	0.00396	11.3901	7.4603	5.21409	1.08294	0.00396	0.004257	79000000	45371674		0	0	79407977		6.08175e+06	6.08175e+06											0.006254	0.664124	0.996642	0.905307	-0.10911	I64	7.4603	0.076589	0.002719	0.004275	0.000247	0.127097	0.203143		9445		22	0
0	0	0	11.3128	0.045319	-0.0782048	0.0113	11.3128	12.7799	12.3015	1.04747	0.0113	0.012035	78000000	45136419		0	0	77932221		3.53184e+06	3.53184e+06											-0.018584	10.313	10.0532	10.1218	-0.122329	F51	12.7799	0.045319	-0.002175	0.011948	0.082059	0.133921	0.203514	2	8612	3	24	0
0	0	0	6.64663	0.043705	-0.0782058	-0.006953	6.64663	13.6174	10.455	1.0457	-0.006953	-0.007277	77000000	45967668		56505.2	0	77236597		3.37566e+06	3.37566e+06											-0.008926	0.013686	0.013686	-0.062888	0.021817	F51	13.6174	0.043705	-0.017498	-0.007304	0.146606	0.181013	0	1	8734	3	23	0
0	0	0	2.65354	0.118931	-0.077433	0.113242	2.65354	2.20058	1.48188	1.13498	0.113242	0.127314	610000000	160600000	0	1.76913e+06	0	613800000	0	73003222	73003222											0.045203	1178.29	1482.27	1477.21	177.127	H61	2.20058	0.118931	0.067492	0.07235	0.036082	0.540021	0.204582	2	8016	3	1685	0
0	0	0	4.36052	0.100605	-0.0774146	0.036693	4.36052	3.312	2.32232	1.11186	0.036693	0.041213	630000000	208800000	0	1325399	0	626600000	0	63041591	63041591											0.020847	-0.115216	-0.03834	-0.037651	-0.044484	H61	3.312	0.100605	0.036627	0.040381	0.01484	0.485853	0.244451	2	12563	3	1622	0
1	0	0	9.94997	0.112276	-0.0773463	0.011942	9.94997	3.13023	2.43647	1.12648	0.011942	0.013368	670000000	234700000	0	905225	0	674000000	0	74980963	75677282											0.075647	-2.76001	-0.175746	-0.187263	-0.041673	H61	3.13023	0.112276	0.012438	0.01298	0.019273	0.45574	0.588556	1	9490	2	1299	0
1	0	0	7.90758	0.189809	-0.0731478	0.089088	7.90758	2.61747	0.656561	1.23428	0.089088	0.108321	3600000000	1653000000	0	58095736	0	3589000000	0	631600000	681300000											4.32523	2.40455	2.33061	1.83312	1.01114	C37	2.61747	0.189809	0.054587	0.065304	0.573705	0.36081	0.18609	2	82354	2	2617	0
1	0	0	3.19562	0.246583	-0.0665184	0.09006	3.19562	2.24524	0.540168	1.32729	0.09006	0.116852	8200000000	4415000000		168500000	7367428	8193000000		1967000000	2020000000	1876000000	1876000000	1469000000	886000000	128600000	388700000	1.3133e+06	642900000	112300000	530500000	1.28249	0.756397	0.541334	0.472322	1.21873	C37	2.24524	0.246583	0.064918	0.085953	0.88816	0.228986	0.174715	2	73034	3	1903	1
1	0	0	2.30939	0.326949	-0.0629386	0.094283	2.30939	1.89029	0.277907	1.48577	0.094283	0.13318	11000000000	6482000000		199700000	17148702	10680000000		3429000000	3491000000	2331000000	2331000000	1884000000	1191000000	153200000	466200000	20359519	1019000000	129500000	889600000	0.303401	9.51459	8.45858	8.58663	2.29145	C37	1.89028	0.326949	0.085217	0.12378	1.06943	0.218287	0.127056	2	59253	3	2417	12
0	0	0	0.679587	0.589999	-0.0695555	0.045549	0.679587	1.67555	0.234951	2.43902	0.045549	0.111266	6100000000	4293000000		172900000	1.655e+06	6084000000		2562000000	3589000000											0.04187	-0.196843	-0.19664	-0.344142	0.288412	S90	1.67555	0.589999	0.056067	0.108864	0.104845	0.4754	0.251613	2	163198	2	4632	608
0	0	0	1.59643	0.602092	-0.067513	0.06015	1.59643	1.80484	0.545606	2.51314	0.06015	0.149136	7500000000	5109000000		291200000	2.93065e+06	7502000000		2831000000	4517000000											0.233115	0.059218	0.449366	0.541073	0.808492	S90	1.80484	0.602092	0.070154	0.136878	0.09562	0.435802	0.199572		154250		5148	630
0	0	0	1.82469	0.72287	-0.06388	0.050391	1.82469	2.53087	0.137176	3.60841	0.050391	0.13184	10000000000	7216000000		175200000	3.62919e+06	10020000000		3537000000	6311000000											0.336262	0.082278	0.204345	-0.144316	0.89294	S90	2.04011	0.62953	0.054912	0.118905	0.110304	0.320887	0.207953		104577		5496	645
0	0	0	1.00879	0.711005	-0.0613439	0.034886	1.00879	2.4852	0.006916	3.46026	0.034886	0.097123	12000000000	8773000000		183600000	5.1967e+06	11790000000		4775000000	7665000000											0.175665	-0.355999	0.482254	0.218808	1.52819	S90	1.83717	0.650402	0.043208	0.092334	0.126408	0.344933	0.268186		133142		5697	672
0	0	0	0.72875	0.643669	-0.0593483	0.024626	0.72875	1.45045	0.277864	2.80638	0.024626	0.069734	13000000000	9626000000	0	406400000	5.19015e+06	13170000000	0	6636000000	8478000000											0.117575	2.68537	2.38639	3.51706	0.33061	S90	1.45045	0.643669	0.042701	0.065476	0.145744	0.305557	0.254201	2	141298	3	5642	177
0	0	0	0.870842	0.628798	-0.058714	0.033166	0.870842	1.30167	0.203686	2.69395	0.033166	0.091145	14000000000	9411000000	0	471600000	3.62882e+06	13610000000	0	7230000000	8559000000											0.033442	-1.02545	-1.10871	-1.11454	0.490341	S90	1.30167	0.628798	0.048294	0.087903	0.191818	0.305252	0.119211	2	130016	3	7358	67
1	0	0	1.32375	0.628934	-0.0571101	0.033352	1.32375	1.64976	0.310997	2.69494	0.033352	0.089865	15000000000	10150000000	0	532900000	5.80168e+06	14730000000	0	6151000000	9261000000											0.081818	0.038329	0.492122	0.628193	0.945968	S90	1.64976	0.628934	0.044721	0.086482	0.179376	0.29279	0.197005	2	119562	3	7457	78
1	0	0	1.57858	0.638202	-0.0522302	0.058826	1.57858	1.5208	0.440357	2.76397	0.058826	0.160746	18000000000	12530000000	0	543100000	10642266	18110000000	0	8242000000	11560000000											0.230107	-0.792633	-0.887326	-0.928186	0.525923	S90	1.5208	0.638202	0.066958	0.147385	0.204964	0.268597	0.218337	2	174815	3	8202	53
1	0	0	1.0298	0.623791	-0.0471767	0.021113	1.0298	1.41374	0.183657	2.6581	0.021113	0.057118	22000000000	14100000000		948000000	15253602	21620000000		9974000000	13490000000	6449000000	6412000000	6379000000	4446000000	612800000	744800000	366700000	541700000	122200000	419500000	0.193718	-0.678909	-0.617143	-0.75793	0.593815	S90	1.41374	0.623791	0.036357	0.051567	0.222904	0.296526	0.225661	2	191353	3	8887	87
1	0	0	0.573223	0.633121	-0.0392752	0.013266	0.573223	1.64165	0.335052	2.72569	0.013266	0.035756	27000000000	18210000000		1070000000	18787858	27110000000		11100000000	17160000000	7071000000	7024000000	7145000000	4656000000	760900000	921200000	453300000	379500000	56227087	323200000	0.253737	-1.3107	-1.42235	-1.3155	0.111925	S90	1.64165	0.633121	0.028646	0.032501	0.293966	0.25908	0.148171	2	184893	3	10944	86
0	0	0	3.75351	0.405049	-0.078026	0.075179	3.75351	0.033703	0.005175	1.68081	0.075179	0.178833	200000000	153800000		6.07847e+06	0	202100000		125400000	130600000											-0.293209	-0.651585	-0.501132	-0.302872	0.659976	F52	1.22648	0.646314	0.094241	0.256648	0.581352	0.594814	0.150106		9729		22	0
0	0	0	7.52033	0.574515	-0.0779831	0.044383	7.52033	0.088965	0.029755	2.35026	0.044383	0.124053	230000000	183400000		5.89021e+06	0	231900000		141400000	148100000											0.147192	-1.55379	-0.504188	-1.25514	0.477201	F52	1.2974	0.638654	0.046106	0.114948	0.434959	0.63338	0.276857	1	12900	3	21
0	0	0	11.4656	0.602239	-0.0779717	0.015034	11.4656	1.28994	0.09767	2.51407	0.015034	0.037996	240000000	186200000	0	7.07794e+06	0	239800000	0	144400000	144400000											0.006388	-3.60695	-3.92753	-3.55734	3.56935	C35	1.28994	0.602239	0.023444	0.037676	0.494042	0.784754	0.30989	1	7494	3	420	4
0	0	0	4.38854	0.358152	-0.0768369	0.006013	4.38854	2.62331	1.24429	1.558	0.006013	0.010094	1000000000	959800000	0	7.86765e+06	0	1028000000	0	365900000	368100000											0.924069	-1.21483	-0.213314	8.92087	1.08376	C35	2.62331	0.358152	0.000377	0.005777	0.457143	0.352586	0.599177	2	24845	3	596	2
1	0	0	5.41111	0.314128	-0.0771589	-0.050439	5.41111	3.5229	1.90273	1.458	-0.082225	-0.124362	800000000	695900000	0	5.08674e+06	0	804200000	0	197500000	252600000											-0.217526	7.80118	8.14217	4.45123	3.16692	C35	3.5229	0.314128	-0.104142	-0.136548	0.329295	0.286365	0.002547	2	20514	3	302	1
1	0	0	1.60021	0.57818	-0.0708648	0.010854	1.60021	1.52898	0.486421	2.37068	0.010854	0.023733	5200000000	3444000000	0	12234768	0	5175000000	0	2252000000	2992000000											5.43439	27.8852	18.5737	4.6254	1.88863	E48	1.52898	0.57818	0.012659	0.014865	0.415795	0.185013	0.445324	2	42127	3	496	0
1	0	0	1.29572	0.543325	-0.0713096	0.007756	1.29572	1.39522	0.061711	2.18974	0.007756	0.017678	4900000000	3031000000		12072321		4866000000		2172000000	2644000000	1054000000	1054000000	1128000000	763300000	30805643	117400000	92354284	68712468	29777171	38935297	-0.059694	-4.87595	-19.7737	138.323	1.34787	E48	1.39522	0.543325	0.026982	0.017522	0.37417	0.216519	0.433359	1	56676	3	513	0
1	0	0	1.43105	0.620116	-0.0738452	-0.050439	1.43105	1.54261	0.091221	2.63238	-0.266589	-0.624681	3100000000	2819000000		11696573		3105000000		1827000000	1926000000	757900000	757900000	1886000000	719500000	41527021	125700000	55456979	-1065000000	-2.72905e+06	-1062000000	-0.361836	-19.5104	-14.6463	-14.5132	-0.678435	E48	1.54261	0.620116	-0.324307	-0.900713	0.378117	0.244074	0.002562	2	61015	3	489	31
0	0	0	0.926547	0.819475	-0.0752771	0.004922	0.926547	0.887954	0.011254	5.53938	0.004922	0.017279	2100000000	1566000000		119400000	0	2111000000		1011000000	1539000000											0.119659	-3.3391	-5.20187	-7.07262	5.6529	S90	1.54901	0.729266	0.015249	0.017208	0.11004	0.295363	0.67155	2	25845	3	2724	150
0	0	0	2.10659	0.326397	-0.0742351	0.039203	2.10659	2.42181	0.011254	1.48455	0.039203	0.157134	2800000000	2254000000		112900000	0	2834000000		1724000000	2172000000											0.342788	-2.17344	-2.14598	-2.0607	-0.610073	S90	1.30765	0.766335	0.039863	0.146359	0.079183	0.298251	0.238523	2	55615	2	2679	175
0	0	0	1.32858	0.699635	-0.0741215	0.060893	1.32858	1.31451	0.309981	3.32928	0.060893	0.227662	2900000000	2266000000		106600000	0	2913000000		1724000000	2038000000											0.027823	3.6743	2.40593	1.97332	0.13863	K70	1.31451	0.699635	0.059104	0.199987	0.068403	0.340913	0.155248		47320		2752	180
0	0	0	0.986366	0.676791	-0.0732771	0.080295	0.986366	1.26244	0.207092	3.09397	0.080295	0.256671	3500000000	2827000000		100000000	0	3500000000		2239000000	2369000000											0.20126	-8.22051	-10.4881	-8.62093	-0.196126	K70	1.26244	0.676791	0.077032	0.227619	0.050073	0.402492	0.241654	2	47653	3	2723	180
0	0	0	1.03556	0.619304	-0.0726274	0.100619	1.03556	1.39999	0.350089	2.62677	0.100619	0.284482	4000000000	3190000000	0	114100000	0	3951000000	0	2279000000	2447000000											0.11224	1.62278	1.58926	1.59774	0.959922	K70	1.39999	0.619304	0.094494	0.249214	0.011059	0.471131	0.230421	2	45928	2	2750	185
0	0	0	1.1553	0.534334	-0.072739	0.076902	1.1553	1.7333	0.538616	2.14746	0.076902	0.181905	3900000000	3145000000	0	106900000	0	3873000000	0	1814000000	2070000000											-0.019605	-21.8361	-15.1682	-10.7959	0.029536	K70	1.7333	0.534334	0.076036	0.166796	0.013715	0.418054	0.288683	2	44931	2	3110	200
1	0	0	1.44815	0.465632	-0.0727245	0.107651	1.44815	2.13654	0.541533	1.87137	0.107651	0.215275	3900000000	3192000000	0	99792587	0	3883000000	0	1494000000	1808000000											0.002591	-0.552841	-0.496115	-0.401635	0.464998	K70	2.13654	0.465632	0.104242	0.201194	0.020959	0.326644	0.246072	2	38575	2	3167	200
1	0	0	1.85825	0.520347	-0.0720095	0.037957	1.85825	1.83314	0.466797	2.08484	0.037957	0.075108	4400000000	3665000000	0	92640084	0	4380000000	0	1999000000	2279000000											0.127849	6.21666	6.31113	-1.77855	0.484644	K70	1.83314	0.520347	0.03409	0.074649	0.035986	0.245999	0.275296	1	38372	2	2819	269
1	0	0	1.56174	0.637636	-0.0687338	0.06432	1.56174	1.3708	0.695953	2.75966	0.06432	0.157293	6700000000	5628000000		85487581		6654000000		4106000000	4243000000	2059000000	2059000000	1567000000	872500000	47306702	99528602	-22407439	491200000	136400000	354900000	0.519341	-186.312	-160.152	-148.187	8.70109	K70	1.37079	0.637636	0.04996	0.147164	0.015328	0.309452	0.277582	1	47510	3	2780	265
1	0	0	1.73751	0.458117	-0.0705498	0.103416	1.73751	1.86483	1.02003	1.84542	0.103416	0.233588	5400000000	4506000000				5393000000		2416000000	2471000000	2905000000	2905000000	2179000000	1628000000	31179193	137000000	-24407456	826700000	203800000	623000000	-0.189504	-0.779067	-0.717131	-0.71207	-0.811346	K70	1.86483	0.458117	0.110981	0.213157	0.01593	0.538571	0.24649	1	47368	2	5196	0
0	0	0	0.787405	0.536142	-0.0633739	0.053134	0.787405	0.411991	0.090391	2.15583	0.053134	0.109958	10000000000	1800000000		307900000		10380000000		4369000000	5563000000											0.227503	-1.73693	-1.96338	-2.18101	-0.125367	C30	0.411991	0.536142	0.055721	0.103933	0.055361	0.41185	0.003593	2	75595	2	8703	0
0	0	0	1.71282	0.308928	-0.0626001	0.085922	1.71282	1.30048	0.197079	1.44703	0.085922	0.17548	11000000000	1694000000		392000000		10910000000		4314000000	5302000000											0.051782	-0.165727	-0.234211	0.114046	0.168708	C30	0.392584	0.485852	0.093478	0.163001	0.054538	0.483729	0.075278		89264		10109	0
0	0	0	2.65746	0.457945	-0.0603589	0.133447	2.65746	0.73944	0.235793	1.84483	0.136592	0.258193	12000000000	2070000000		381300000	3142226	12470000000		2800000000	5710000000											0.142602	0.020474	-0.004697	0.002402	0.092404	C30	0.73944	0.457945	0.136587	0.236264	0.031276	0.621025	0.143881	2	203596	2	11719	0
0	0	0	0.988971	0.521906	-0.0563095	0.096394	0.988971	0.649313	0.140323	2.09164	0.096394	0.190189	15000000000	2936000000		913500000	30688334	15280000000		4521000000	7975000000											0.22549	-0.662981	-0.61465	-0.79243	-0.146683	C30	0.649313	0.521906	0.096969	0.183073	0.038111	0.541229	0.183436	2	271779	2	11909	0
0	0	0	0.984494	0.493004	-0.0576713	0.024972	0.984494	0.424369	0.11054	1.9724	0.024972	0.050748	14000000000	1719000000	0	929500000	3610292	14340000000	0	4050000000	7068000000											-0.061878	-1.58994	-1.51483	-1.63771	-0.126558	C30	0.424369	0.493004	0.04316	0.05088	0.039577	0.487894	0.19357	2	235100	2	11373	0
0	0	0	0.956377	0.442868	-0.0566012	0.110232	0.956377	0.592974	0.070571	1.79491	0.110232	0.206931	15000000000	2323000000	0	933300000	9881310	15080000000	0	3917000000	6678000000											0.051832	1.81726	1.37861	1.76654	-0.015382	C30	0.592974	0.442868	0.123321	0.192981	0.017641	0.51289	0.138147	2	219171	2	9956	0
1	0	0	0.98871	0.442985	-0.0563052	0.056255	0.98871	0.265377	0.027376	1.79528	0.056255	0.100983	15000000000	1520000000	0	946600000	17675656	15280000000	0	5729000000	6771000000											0.01363	-0.546314	-0.840049	-0.88995	0.004925	C30	0.265377	0.442985	0.071025	0.100315	0.045181	0.460895	0.048802	2	195297	2	10432	0
1	0	0	1.41188	0.511696	-0.0557683	0.035404	1.41188	0.447401	0.109526	2.0479	0.035404	0.067792	16000000000	2348000000	0	846200000	26280426	15660000000	0	5248000000	8012000000											0.035746	-0.263204	-0.04834	-0.023452	-0.000161	C30	0.447401	0.511696	0.052782	0.071641	0.060957	0.474599	0.14624	2	162226	2	10548	0
1	0	0	1.1109	0.525907	-0.053623	0.049032	1.1109	0.380342	0.084047	2.10929	0.049032	0.101964	17000000000	2645000000		1032000000	66927714	17150000000		6955000000	9018000000	8974000000	8974000000	8058000000	6562000000	301800000	766600000	265800000	956100000	151900000	804200000	0.106989	-0.662272	-0.612057	-0.602532	0.068861	C30	0.380342	0.525907	0.062405	0.098931	0.069978	0.523367	0.158854	2	169987	2	11515	0
1	0	0	0.87607	0.55057	-0.0501836	0.04518	0.87607	0.661976	0.329909	2.22504	0.04518	0.098012	20000000000	4936000000		1047000000	61365537	19540000000		7456000000	10760000000	10880000000	10880000000	9982000000	8216000000	336100000	919300000	316000000	996300000	167700000	828600000	0.139279	-0.667876	-0.646854	-0.457938	0.084987	C30	0.661976	0.55057	0.058592	0.094382	0.058665	0.556918	0.168292	2	165330	2	12105	0
0	0	0	0.890433	0.743529	-0.075916	0.031469	0.890433	1.52316	0.270136	3.89907	0.031469	0.109833	1700000000	1551000000		0	0	1667000000		1018000000	1240000000											0.506148	-5.74826	-6.29044	-6.47939	46.6138	K70	1.52316	0.743529	0.032502	0.102082	0.015582	0.187217	0.183826	2	14092	2	110	0
0	0	0	1.79481	0.667632	-0.0758084	0.04879	1.79481	1.06285	0.323263	3.00871	0.04879	0.181623	1700000000	1556000000		0	0	1742000000		1103000000	1254000000											0.04481	-0.630849	-0.704628	-0.691888	0.512462	K70	1.41006	0.719721	0.067208	0.170345	0.007202	0.398349	0.202752	2	20116	2	104	0
0	0	0	1.16601	0.592759	-0.0760276	0.046593	1.16601	1.86392	0.351633	2.45555	0.046593	0.148121	1600000000	1401000000		0	0	1590000000		729600000	1030000000											-0.087361	-2.57778	-2.29051	-2.42938	11.4757	K70	1.92077	0.647874	0.057741	0.138653	0.007579	0.462458	0.189645		31437		98	0
0	0	0	0.549908	0.63523	-0.0757286	0.038165	0.549908	2.34208	0.308226	2.74145	0.038165	0.111051	1800000000	1613000000		0	0	1797000000		642800000	1193000000											0.130557	2.54262	3.5443	3.59938	2.32004	K70	2.5092	0.663812	0.041478	0.106967	0.015055	0.222465	0.21311	2	29284	3	177	0
0	0	0	0.846552	0.686526	-0.0754072	0.017379	0.846552	1.47708	0.227604	3.19006	0.017379	0.053612	2000000000	1827000000	0	0	0	2021000000	0	1237000000	1387000000											0.124182	-8.10726	-8.86519	-8.8777	7.48487	K70	1.47708	0.686526	0.026727	0.052378	0.01048	0.208517	0.217757	2	37020	3	173	0
0	0	0	1.0934	0.649425	-0.0755913	0.017994	1.0934	2.59124	0.329437	2.85245	0.017994	0.054295	1900000000	1681000000	0	187300	0	1893000000	0	648900000	1229000000											-0.063245	-16.8287	17.7289	14.8412	0.735221	K70	2.59124	0.649425	0.026276	0.053061	0.009126	0.297958	0.288958	1	30861	3	217	0
1	0	0	1.24446	0.676601	-0.0750958	0.030408	1.24446	2.63839	0.284013	3.09216	0.030408	0.090538	2200000000	2040000000	0	146300	0	2237000000	0	773000000	1513000000											0.181759	-4.86308	-4.80342	-4.78935	2.54268	K70	2.63839	0.676601	0.032374	0.086794	0.009315	0.228823	0.257038	1	19642	3	217	0
1	0	0	2.11972	0.643892	-0.0751912	0.024238	2.11972	2.74175	0.137363	2.80814	0.024238	0.071391	2200000000	1981000000	0	701992	0	2171000000	0	722600000	1398000000											-0.029605	-4.36306	-10.4994	-6.92001	3.65548	K70	2.74175	0.643892	0.027324	0.069101	0.011243	0.190376	0.258101	1	24268	3	186	0
1	0	0	2.23792	0.575952	-0.0756185	0.014397	2.23792	2.26458	0.309587	2.35823	0.014397	0.037145	1900000000	1697000000		525892		1874000000		749200000	1079000000	620800000	620800000	597900000	491000000	24362690	54302449	3933690	39609122	10496415	29112708	-0.136696	-7.11647	-7.58158	-5.37732	8.10157	K70	2.26458	0.575952	0.017636	0.036639	0.00171	0.33128	0.265	1	18453	3	162	0
1	0	0	1.42277	0.476437	-0.0761161	0.00646	1.42277	2.12427	0.192764	1.90999	0.00646	0.013781	1500000000	1356000000		349792		1528000000		638100000	728100000	513100000	513100000	513500000	414000000	24341902	57411820	3.05407e+06	16065866	5.07766e+06	10988210	-0.184403	2.46798	2.76496	-3.05827	-0.328108	K70	2.12427	0.476437	0.009188	0.013733	0.00119	0.335764	0.316052	1	22634	3	156	0
0	1	0	0.297015	0.611403	-0.0631231	0.02802	0.297015	1.36012	0.059352	2.57336	0.02802	0.071024	11000000000	8943000000		69223900	0	10550000000		6469000000	6514000000											-0.004691	-0.275971	-0.550373	-0.68056	-0.06683	C39	1.3824	0.617391	0.026456	0.068819	0.108663	1.15688	0.060109	2	113544	3	17217	184
0	1	0	0.552493	0.696626	-0.0587769	0.012222	0.552493	1.22981	0.039092	3.29626	0.012222	0.0362	14000000000	11650000000		167500000	0	13570000000		9382000000	9462000000											0.286047	0.210325	-0.654312	-0.924028	0.09836	C39	1.24137	0.697358	0.01488	0.035893	0.098202	0.977222	-0.010202		79120		2555	155
0	1	0	0.294907	0.747621	-0.0546022	0.006738	0.294907	1.18479	0.0238	3.9623	0.006738	0.024294	16000000000	14170000000		191500000	0	16470000000		11600000000	12240000000											0.213649	0.780328	-1.80496	-3.86347	0.019461	C39	1.22167	0.743477	0.004084	0.023955	0.115194	1.03914	-0.153722		111080		20424	113
0	1	0	0.183059	0.749408	-0.0539691	0.001449	0.183059	1.17333	0.054358	3.99055	0.001449	0.005716	17000000000	13950000000		194400000	0	16910000000		11890000000	12670000000											0.026693	4.22375	1.93233	0.032059	0.057168	C39	1.17333	0.749408	0.00431	0.005707	0.116727	0.959256	-1.52743		105086		19724
0	1	0	0.197784	0.743593	-0.0544639	0.002715	0.197784	1.13153	0.070088	3.90005	0.002715	0.010712	17000000000	13300000000	0	290300000	0	16560000000	0	11760000000	12320000000											-0.02032	5.97521	7.54163	1.87542	0.148739	C39	1.13153	0.743593	0.013582	0.010699	0.107734	1.10716	0.505167	2	100130	3	20798
0	1	0	0.251646	0.728132	-0.0556443	0.003705	0.251646	1.10712	0.156849	3.67825	0.003705	0.014036	16000000000	12500000000	0	359600000	0	15740000000	0	11290000000	11460000000											-0.049486	4.32753	-0.680072	0.748628	0.065074	C39	1.10712	0.728132	1.3e-05	0.013982	0.123008	1.27081	0.671297	1	91428	3	20542
1	1	1	0.348304	0.743884	-0.0541522	0.003722	0.348304	1.13721	0.14493	3.90449	0.003722	0.014112	17000000000	12870000000	0	347600000	0	16780000000	0	11320000000	12480000000											0.065755	3.326	-1.52332	0.924178	0.17477	C39	1.13721	0.743884	0.011519	0.014084	0.116318	1.15758	0.344827	1	67755	3	18776
1	1	1	0.959299	0.784184	-0.0577943	-0.050439	0.959299	0.966471	0.136194	4.63359	-0.082234	-0.34609	14000000000	10560000000	0	352600000	0	14250000000	0	10930000000	11170000000											-0.15072	-0.246279	-0.19857	-0.1079	-0.071362	C39	0.966471	0.784184	-0.064927	-0.414848	0.111378	1.29086	0.17446	2	167819	3	18541	0
1	1	1	0.537134	0.807546	-0.0534843	0.005854	0.537134	0.98231	0.148061	5.19606	0.005854	0.028832	17000000000	13410000000		302000000		17240000000		13650000000	13920000000	20300000000	20300000000	20870000000	17520000000	2286000000	607600000	154800000	27734858	-64440501	92175358	0.210012	-3.39159	-2.16864	-1.25655	-0.054268	C39	0.98231	0.807546	0.014321	0.027776	0.113697	1.17724	-2.32345	2	134479	2	17390	0
1	1	1	0.500511	0.652011	-0.0443888	0.133447	0.500511	1.25679	0.206097	2.87365	0.249343	0.883385	24000000000	18890000000		205100000		23560000000		15030000000	15360000000	31230000000	31230000000	31420000000	27790000000	2142000000	777700000	340900000	6658000000	1572000000	5087000000	0.366269	48.3139	54.7821	72.5626	0.263369	C39	1.25679	0.652011	0.230392	0.620483	0.110258	1.32553	0.236036	2	91577	2	17822	0
0	0	0	0.887981	10.443	-0.0780421	-0.050439	0.887981	0.052379	0.005574	-0.105898	-0.219551	0.02465	190000000	94776147		27180151	0	190900000		1809000000	1994000000											-0.109542	-3.62306	-3.62306	-4.45629	-0.266623	C37	0.052379	10.443	-0.064989	0.02468	0.001404	1.43639	0	1	34406	3	188	2
0	0	0	3.37302	11.9667	-0.0780727	-0.050439	3.37302	0.046136	0.012007	-0.091185	-0.58881	0.057953	170000000	85426952		26317289	0	169700000		1852000000	2031000000											-0.111061	0.826156	0.826156	0.257024	-0.272676	C37	0.046136	11.9667	-0.074808	0.057045	0.001586	1.5375	0	1	32191	3	87	0
0	0	0	14.5971	14.7031	-0.0781181	0.133447	12.9916	0.029048	0.000306	-0.072976	0.418882	-0.03565	140000000	62101170		25454427	0	138200000		1715000000	1894000000											-0.185852	-13.9337	-13.9337	-0.208426	-0.21025	C37	0.036205	13.7114	0.933658	-0.036714	0.005795	2.16438	0		35180		84	0
0	0	0	7.75462	13.3969	-0.0781216	0.133447	7.75462	0.042671	0.014855	-0.080665	0.290034	-0.0231	140000000	70509239		24591565	0	135700000		1652000000	1819000000											-0.017454	-5.11955	-5.11955	-1.20787	-0.049319	C37	0.042671	13.3969	0.466604	-0.023603	0.012054	2.36502	0		38363		84	0
0	0	0	10.9126	0.949187	-0.0780989	0.133447	10.9126	1.0153	0.186591	19.6799	10.0322	-1.85211	150000000	146000000	0	5271000	0	151500000	0	143800000	143800000											-0.068477	689.242	729.292	13.9488	-0.256394	C37	1.0153	0.949187	10.3923	204.69	0.026042	1.78938	0.055727	2	34993	2	48	0
1	0	0	52.8344	0.737887	-0.0782429	0.056975	12.9916	1.21562	0.793921	3.81515	0.056975	0.545698	51000000	46185689	0	4518000	0	51489648	0	37993541	37993541											-0.66016	-0.037017	0.025246	4.95587	-0.343	C37	1.21562	0.737887	0.108945	0.428494	0.032022	4.1187	0.270639	2	35266	2	49	0
1	0	0	121.483	0.708077	-0.078251	-0.002176	12.9916	1.26258	0.823676	3.42556	-0.002176	-0.00788	46000000	41007122	0	3765000	0	45869095	0	32478864	32478864											-0.109159	-5.51381	-4.77628	-7.16693	-0.495763	C37	1.26258	0.708077	-0.017029	-0.007911	0.053777	3.72778	-8.35796	1	49038	3	54	0
1	0	0	91.5706	0.680489	-0.0782392	0.077865	12.9916	1.25799	0.652475	3.12978	0.077865	0.253754	54000000	46302124		3012000		54088276		36806465	36806465	142000000	142000000	137800000	126200000	5.54795e+06	5.70534e+06	-577246	4.79819e+06	906608	3.89158e+06	0.179188	-0.588654	-0.727306	-0.715184	-0.593527	C37	1.25799	0.680489	0.061276	0.225184	0.087141	2.62479	0.188948	2	57890	2	53	0
1	0	0	33.1291	0.743597	-0.0782111	0.024742	12.9916	1.21059	0.350597	3.90012	0.024742	0.087385	74000000	66218015		2259000		73559961		54698991	54698991	137500000	137500000	135700000	124000000	5.46258e+06	5.74327e+06	-209570	2.09486e+06	515704	1.57916e+06	0.359998	5.20434	6.18413	8.40293	-0.099028	C37	1.21059	0.743597	0.018619	0.083726	0.21098	1.8691	0.246176	1	51332	3	51	0
0	0	0	2.46343	0.321194	-0.0780392	-0.050439	2.46343	1.44573	1.24901	1.47318	-0.123385	-0.17289	190000000	71033614		0	0	192900000		49133445	61966063											-0.159196	2.02518	2.04592	2.06368	-0.147453	C17	1.44573	0.321194	-0.1369	-0.198975	0.058576	0.243004	0.004253	2	11324	2	35	0
0	0	0	5.35298	0.286865	-0.0780271	0.059422	5.35298	1.36756	1.24343	1.40226	0.059422	0.085335	200000000	61706502		2117958	0	201300000		45121627	57751198											0.043511	12.1082	12.0591	12.6315	-0.045252	C17	1.36756	0.286865	0.06217	0.081588	0.087153	0.136688	-0.0039	2	13952	2	33
0	0	0	5.12545	0.070217	-0.0780352	0.011943	5.12545	16.0973	3.80585	1.07552	0.011943	0.016627	200000000	53085859		2049023	0	195700000		42086051	54114515											-0.027746	-5.21566	-5.26367	-5.25975	-0.183578	C17	1.26137	0.276472	0.015446	0.016742	0.062728	0.047775	-0.019217		11637		30	0
0	0	0	3.41553	0.3168	-0.078069	-0.050439	3.41553	1.26865	1.234	1.4637	-0.0947	-0.134393	170000000	54898575		1901069	0	172200000		43273215	54565212											-0.120029	0.256093	0.266658	0.265051	-0.245551	C17	1.26865	0.3168	-0.099323	-0.148066	0.075602	0.057191	0.002456		11710		27	0
0	0	0	4.84402	0.316993	-0.0780693	-0.001437	4.84402	1.26847	1.20347	1.46412	-0.001437	-0.002104	170000000	55048372	0	1860764	0	172000000	0	43397339	54523680											-0.001372	-4.00691	-3.98558	-2.76387	0.695511	C17	1.26847	0.316993	-0.00402	-0.002105	0.067117	0.064509	0.144775	1	10742	2	27	0
0	0	0	7.03446	0.269328	-0.0780715	0.045838	7.03446	1.86646	1.8118	1.3686	0.045838	0.064859	170000000	65418721	0	1820459	0	170500000	0	35049567	45921137											-0.008719	1.3332	1.99702	-21.1911	6.49659	C17	1.86646	0.269328	0.047491	0.06301	0	0.158349	0.232995	1	9164	2	31	1
1	0	0	16.7862	0.297661	-0.0780515	0.024159	12.9916	1.67403	1.32836	1.42381	0.024159	0.033743	180000000	73866989	0	1780154	0	184400000	0	44125162	54894362											0.081618	6.16276	7.20626	4.19435	0.009672	C17	1.67403	0.297661	0.021785	0.033099	0	0.05973	0.095695	1	10134	2	21	1
1	0	0	4.89042	0.681256	-0.0725313	0.133447	4.89042	1.39849	0.215292	3.13731	0.164737	0.490903	4000000000	3785000000	0	9.26775e+06	0	4017000000	0	2707000000	2737000000											0.641407	-0.573902	-0.669204	-0.669538	-0.624278	C17	1.3985	0.681256	0.099807	0.270278	0.586683	0.998232	0.196589	2	15008	2	1681	0
1	0	0	2.04599	0.770794	-0.0668157	0.078658	2.04599	1.4062	0.177117	4.36288	0.078658	0.303497	8000000000	7492000000		106200000		7986000000		5328000000	6156000000	4665000000	4665000000	4111000000	3459000000	30318688	313900000	127400000	561300000	89244862	472100000	0.987866	0.689685	0.578899	0.7485	0.118263	E50	1.4062	0.770794	0.075071	0.257906	0.798536	0.584134	0.158986	2	59940	2	2440	3
1	0	0	0.817972	0.806291	-0.0615136	0.039081	0.817972	1.24242	0.079824	5.16238	0.039081	0.187768	12000000000	10070000000		127500000		11670000000		8108000000	9408000000	6497000000	6497000000	5991000000	4886000000	32213248	313000000	432600000	511000000	127000000	384000000	0.461005	-1.27601	-0.964359	-0.958414	0.091434	E50	1.24242	0.806291	0.06999	0.169919	0.878339	0.55684	0.248515	2	67510	2	2875	9
0	0	0	1.61591	0.279769	-0.077551	0.032027	1.61591	1.11153	0.165161	1.38844	0.032027	0.04269	530000000	151400000		116500000	0	531900000		136200000	148800000											0.136448	-1.16624	-0.92191	-1.53364	-0.142499	C15	1.11153	0.279769	0.039	0.041798	0.24152	0.284087	0.142818	1	23613	2	420	0
0	0	0	2.82001	0.413914	-0.0774193	-0.017078	2.82001	1.01169	0.433523	1.70624	-0.017078	-0.026361	620000000	211500000		142000000	0	623400000		209000000	258000000											0.17185	-3.09256	-3.11368	-3.20014	-0.08833	C15	1.01169	0.413914	-0.00421	-0.027003	0.179639	0.295404	-0.130473	1	22624	2	440
0	0	0	2.75105	0.357022	-0.0773688	0.01402	2.75105	1.60174	0.111884	1.55526	0.01402	0.024341	660000000	238000000		187400000	0	658500000		258500000	285500000											0.056327	-10.3046	-11.3535	-7.44268	0.019635	C15	0.920919	0.433623	0.028571	0.024093	0.265125	0.348988	0.195219		22693		610	0
0	0	0	1.72651	0.162047	-0.0767877	0.01121	1.72651	3.73975	2.60587	1.19338	0.01121	0.015273	1100000000	626900000		202500000	0	1062000000		167600000	172100000											0.612778	-1.90534	-1.82234	-1.86924	0.292491	C15	3.73975	0.162047	0.011868	0.010837	0.225527	0.299662	0.29572	2	20368	2	653	0
0	0	0	1.64689	0.177289	-0.0765558	0.064827	1.64689	3.53008	1.79149	1.21549	0.064827	0.078125	1200000000	734800000	0	198300000	0	1223000000	0	208200000	216800000											0.151634	2.31035	2.36557	2.03027	0.790928	C15	3.53008	0.177289	0.060164	0.07361	0.339144	0.254122	0.03667	2	22944	3	712	0
0	0	0	1.36793	0.243113	-0.0763921	0.035329	1.36793	2.31822	0.833511	1.3212	0.035329	0.044814	1300000000	716800000	0	205700000	0	1337000000	0	309200000	325000000											0.092923	-1.17279	-0.946329	-1.17641	-0.267124	C15	2.31822	0.243113	0.033736	0.044692	0.243348	0.327926	0.270779	1	20371	2	820	0
1	0	0	1.9451	0.139418	-0.0766542	0.011341	1.9451	3.70657	1.83608	1.162	0.011341	0.014089	1200000000	538700000	0	197000000	0	1155000000	0	145300000	161000000											0.024654	-5.57793	-5.78445	-4.80714	1.51844	C15	3.70657	0.139418	0.01134	0.014217	0.280201	0.318827	0.217562	2	18932	3	814	0
1	0	0	4.58502	0.09743	-0.0767898	-0.038789	4.58502	5.02589	1.66214	1.10795	-0.038789	-0.044045	1100000000	446000000	0	193100000	0	1060000000	0	88749326	103300000											-0.081546	0.911182	0.910858	0.999239	0.02914	C15	5.02588	0.09743	-0.042352	-0.044884	0.224549	0.318942	-0.062721	2	34553	3	844	0
1	0	0	5.81094	0.109292	-0.0766198	0.080523	5.81094	5.27466	3.12295	1.1227	0.080523	0.089837	1200000000	605600000		195700000		1179000000		114800000	128800000	273400000	273400000	341400000	204600000	44338389	86120689	-1.18224e+06	114200000	24060552	90145526	0.111353	-9.25098	-10.9625	-9.25692	-0.391495	C15	5.27466	0.109292	0.075486	0.085874	0.22892	0.231967	0.210677	2	75418	2	769	0
0	0	0	1.19091	0.44933	-0.0776738	0.018444	1.19091	0.954623	0.059598	1.81597	0.018444	0.030889	450000000	197600000		6.25307e+06	0	446700000		198500000	198900000											0.194444	7.60694	5.07596	-17.8589	0.983404	C39	0.995348	0.445208	0.031556	0.030539	0.519517	0.424029	-0.539888	2	23992	3	1493	0
0	0	0	3.14243	0.582391	-0.0772272	0.006904	3.14243	3.05735	0.208709	2.39458	0.006904	0.016626	760000000	443800000		54779558	0	756800000		278800000	504800000											0.694268	-2.03561	-1.56812	-1.40037	-0.12987	C39	1.59211	0.667058	0.020944	0.016489	0.390597	0.671612	0.418393	1	28905	3	1071	0
0	0	0	2.86034	0.495743	-0.0772717	0.012379	2.86034	3.3811	0.621288	1.98312	0.012379	0.035397	730000000	415200000		53426885	0	725900000		250000000	459300000											-0.040812	9.69802	-24.7189	19.7703	0.388537	C39	1.66088	0.632778	0.037551	0.034428	0.24367	1.02712	0.266098		30497		1078	0
0	0	0	1.70802	0.453156	-0.0773545	0.014882	1.70802	3.94475	0.737286	1.82868	0.014882	0.038176	670000000	361900000		51963538	0	668400000		205100000	391400000											-0.079225	-7.03753	40.7864	6.66934	-0.154115	C39	1.76465	0.58566	0.043918	0.037461	0.097688	1.31029	0.286311		28760		1004	0
0	0	0	2.03895	0.588963	-0.0773354	0.004803	2.03895	1.62546	0.424214	2.43287	0.004803	0.011638	680000000	384100000	0	50538068	0	681600000	0	236300000	401500000											0.019838	21.6503	30.8918	18.9909	0.058704	C39	1.62546	0.588963	0.036547	0.011571	0.223491	1.06198	0.300127	1	28467	3	1060	0
0	0	0	2.01397	0.62581	-0.0772638	-0.009225	2.01397	1.50731	0.173252	2.67244	-0.009225	-0.023535	730000000	441100000	0	49360980	0	731300000	0	292700000	457700000											0.072917	5.31563	3.84668	4.48159	0.151714	C39	1.50731	0.62581	0.020424	-0.023815	0.258892	0.857076	0.141902	1	26022	3	1047	0
1	0	0	5.4396	0.72819	-0.0766537	-0.003625	5.4396	3.38561	2.23031	3.67905	-0.003625	-0.014114	1200000000	960700000	0	46372390	0	1155000000	0	283700000	841100000											-0.006666	-5.15926	-4.05348	-5.37851	-0.217904	C39	3.38561	0.72819	0.038263	-0.013381	0.220172	0.432433	-43.142	2	36044	3	821	0
1	0	0	7.42027	0.494528	-0.0774062	0.006107	7.42027	1.12753	0.335347	1.97835	0.006107	0.017227	630000000	349700000		44878096		632500000		310200000	312800000	619200000	619200000	611100000	534700000	11415271	50261496	5.0129e+06	8.68301e+06	3.2253e+06	5.45771e+06	-0.452397	-1.34316	-1.73052	-2.04526	0.100678	C39	1.12753	0.494528	0.016555	0.017071	0.2258	0.978959	0.37145	1	27759	3	941	0
1	0	0	4.83413	0.490804	-0.0774101	0.001544	4.83413	1.12646	0.263651	1.96388	0.001544	0.003043	630000000	348100000		43307316		629800000		309000000	309100000	858000000	858000000	853500000	777900000	15916494	42783112	8.97909e+06	2.53108e+06	1.55667e+06	974409	-0.004289	-1.34816	-1.75544	-2.95679	-0.202686	C39	1.12646	0.490804	0.015805	0.003039	0.173414	1.36248	0.615023	1	27633	3	993	0
0	1	0	0.84059	0.2002	-0.0720787	0.066797	0.84059	3.20652	1.66093	1.25031	0.066797	0.091054	4300000000	2576000000		12726454	0	4332000000		803300000	867200000											-0.157933	0.390529	-0.114149	-0.268445	-0.194858	C39	3.20652	0.2002	0.07416	0.091349	0.056994	3.2198	-0.020239	2	104821	3	7335	0
0	1	0	2.0885	0.182337	-0.0704995	0.054495	2.0885	3.19766	1.67634	1.223	0.054495	0.071707	5400000000	3443000000		12466888	0	5428000000		1456000000	1475000000											0.101832	0.520049	0.498235	0.445232	0.195744	C39	2.36411	0.271815	0.043216	0.067278	0.074445	2.46953	0.14322	2	82256	3	13955	0
0	1	0	2.32329	0.272019	-0.0687162	0.058925	2.32329	1.93563	0.854127	1.37366	0.058925	0.08453	6700000000	4058000000		12212181	0	6667000000		2136000000	2188000000											0.228109	0.116221	0.011333	0.299048	-0.213246	C39	1.90004	0.328237	0.050499	0.07957	0.070983	3.11579	0.108524		107097		17489	0
0	1	0	0.654741	0.582013	-0.0634305	0.025894	0.654741	1.26663	0.374698	2.39242	0.025894	0.050038	10000000000	7568000000		52953675	0	10340000000		5975000000	6016000000											0.550543	-0.227705	-0.381918	-0.374374	-0.08774	C39	1.26663	0.582013	0.014116	0.050952	0.07998	1.80234	0.161559	1	119144	2	18688	0
0	1	0	0.610311	0.59178	-0.0636543	0.000824	0.610311	1.24513	0.309913	2.44966	0.000824	0.001994	10000000000	7467000000	0	51871563	0	10180000000	0	5997000000	6025000000											-0.015033	0.015215	-2.16497	-1.86583	0.015679	C39	1.24513	0.59178	-0.006962	0.002034	0.085196	1.61074	0.855393	2	105474	3	17279	0
0	1	0	0.565929	0.638573	-0.0585487	0.013291	0.565929	1.25557	0.256792	2.76681	0.013291	0.034851	14000000000	10960000000	0	88904894	0	13730000000	0	8731000000	8765000000											0.348204	-0.162559	-0.048775	-0.066478	0.095468	C39	1.25557	0.638573	-0.009843	0.032024	0.122156	1.09565	0.364737	2	98846	2	14881	0
1	1	1	0.731027	0.649905	-0.0575062	0.011396	0.731027	1.23832	0.205504	2.85637	0.011396	0.032047	14000000000	11590000000	0	147900000	0	14450000000	0	9362000000	9391000000											0.052735	-0.777516	-0.508425	-0.505869	0.029238	C39	1.23832	0.649905	-0.002557	0.031737	0.134693	1.13797	0.408807	2	93794	2	17506	0
1	1	1	1.23755	0.636919	-0.0576688	0.012551	1.23755	1.16549	0.252781	2.75421	0.012551	0.0352	14000000000	10480000000	0	146600000	0	14340000000	0	8995000000	9132000000											-0.007813	7.45008	4.51876	1.09149	0.034506	C39	1.16549	0.636919	0.00428	0.034704	0.105657	1.07144	0.348853	1	120005	3	20476	0
1	1	1	1.18405	0.547908	-0.0614422	0.017175	1.18405	1.16735	0.173164	2.21194	0.017175	0.042605	12000000000	7268000000		143800000		11720000000		6226000000	6420000000	15070000000	15070000000	14960000000	14210000000	39352506	497800000	47212062	373400000	149700000	223700000	-0.182747	-1.92617	-1.45786	-1.64658	0.215266	C39	1.16735	0.547908	0.023124	0.042237	0.148786	1.28605	0.400801	2	115781	3	36787	0
1	1	1	0.862398	0.642835	-0.0544112	0.040534	0.862398	1.07806	0.154964	2.79982	0.040534	0.102243	17000000000	11210000000		229700000		16600000000		10400000000	10670000000	14210000000	14210000000	14000000000	13300000000	44491711	509700000	23956646	731700000	157800000	573900000	0.416656	-0.486429	-0.397146	-0.306987	-0.015386	C39	1.07806	0.642835	0.036016	0.096799	0.114424	0.856037	0.215677	2	102868	2	24626	0
0	0	0	1.06331	0.256622	-0.0708949	0.133447	1.06331	2.0165	0.698825	1.34521	0.178005	0.291832	5200000000	843800000		1075000000		5154000000		1351000000	1826000000											-0.055633	-0.177617	-0.176464	-0.203306	-0.210491	G58	0.624711	0.35432	0.17182	0.283806	0.07611	0.371383	0.085847	2	42672	3	2012	0
0	0	0	1.64244	0.298584	-0.0703561	0.113117	1.64244	2.41129	0.99906	1.42569	0.113117	0.17905	5500000000	1001000000		1072000000		5528000000		1619000000	2107000000											0.072597	-0.204481	-0.214926	-0.185727	-0.039328	G58	0.618129	0.38121	0.111202	0.176617	0.142741	0.265099	0.111435	2	37302	3	1899	0
0	0	0	1.38969	0.425278	-0.0693849	0.133447	1.38969	0.906088	0.380584	1.73997	0.140944	0.22874	6200000000	1075000000		1074000000	0	6202000000		2259000000	2395000000											0.121984	-0.320668	-0.299645	-0.300006	-0.083754	G58	0.476089	0.386159	0.131583	0.217128	0.103293	0.280614	0.142859	2	37081	3	1841	0
0	0	0	0.84999	0.424714	-0.0688981	0.104811	0.84999	0.702612	0.134327	1.73826	0.104811	0.168775	6500000000	749500000		1039000000		6540000000		2203000000	2434000000											0.054504	-0.033845	-0.006563	-0.005109	-0.024758	G58	0.340209	0.372183	0.103994	0.162632	0.135116	0.261174	0.181986	2	38502	3	1813	0
0	0	0	0.922778	0.341554	-0.0685512	0.092448	0.922778	0.401392	0.205214	1.51873	0.092448	0.143685	6800000000	615800000	0	1008000000	0	6781000000	0	1534000000	2316000000											0.036834	-0.341532	-0.366141	-0.364911	-0.1595	G55	0.401392	0.341554	0.101242	0.13791	0.140943	0.26306	0.168884	2	35892	3	1795	0
0	0	0	1.27829	0.35642	-0.0677369	0.090953	1.27829	0.662109	0.476291	1.55381	0.090953	0.139775	7300000000	994700000	0	986000000	0	7347000000	0	1502000000	2618000000											0.083378	-0.589779	-0.479425	-0.480354	0.019217	G55	0.662109	0.35642	0.093028	0.135886	0.125474	0.242397	0.154619	2	37120	2	1781	0
1	0	0	1.82898	0.297041	-0.0683284	0.074188	1.82898	0.779228	0.483514	1.42256	0.074188	0.110331	6900000000	755300000	0	950000000	0	6936000000	0	969200000	2060000000											-0.055905	-0.55328	-0.281094	-0.257883	0.003044	G55	0.779228	0.297041	0.087577	0.108662	0.112836	0.260209	0.212252	2	34990	2	1744	0
1	0	0	1.63794	0.243639	-0.0683601	0.094258	1.63794	0.848617	0.62786	1.32212	0.094258	0.129188	6900000000	923300000	0	1047000000	0	6914000000	0	1088000000	1684000000											-0.003179	-0.366965	-0.356861	-0.350074	-0.054556	G55	0.848617	0.243639	0.103014	0.124819	0.100938	0.270852	0.103443	2	37528	2	1447	0
1	0	0	1.64212	0.148552	-0.0687825	0.098986	1.64212	1.13178	0.729073	1.17447	0.098986	0.123289	6600000000	661400000		1011000000		6620000000		584400000	983500000	1905000000	1905000000	1257000000	1050000000		174500000	17022615	770700000	100800000	669800000	-0.042422	-0.332575	-0.326126	-0.323513	-0.052147	G55	1.13178	0.148552	0.10375	0.118831	0.091299	0.28776	0.130809	2	35947	2	1415	0
0	0	0	0.542519	0.554267	-0.0769137	0.024371	0.542519	0.791908	0.118398	2.24349	0.024371	0.072028	970000000	603200000		5.86778e+06	0	974500000		509700000	672500000											0.219298	13.6606	5.34408	5.37954	0.299877	E47	1.1834	0.690112	0.033356	0.071574	0.319719	0.550488	-0.345328	2	18847	3	1121
0	0	0	1.26468	0.708031	-0.0767686	0.023841	1.26468	0.923486	0.099193	3.42501	0.023841	0.07934	1100000000	701100000		5481768	0	1075000000		759200000	761300000											0.103405	0.420403	0.202077	0.219948	0.662546	E47	0.923486	0.708031	0.030457	0.077829	0.270499	0.725555	-0.05148	2	21654	3	1107
0	0	0	1.24782	0.661815	-0.0769654	0.012964	1.24782	1.02094	0.124817	2.95696	0.012964	0.04135	940000000	606000000		9.57098e+06	0	938500000		593600000	621100000											-0.124399	-0.763417	-0.34349	-0.483841	0.404227	E47	1.02094	0.661815	0.035168	0.041125	0.306936	0.979855	0.521803		18854		1238
0	0	0	0.723236	0.667481	-0.0767421	0.008956	0.723236	0.818791	0.139909	3.00735	0.008956	0.027467	1100000000	768200000		8.84167e+06	0	1094000000		665900000	748300000											0.165207	-13.8962	12.2951	13.0014	0.65276	E47	1.15355	0.684301	0.02765	0.026359	0.47792	0.731684	0.581419		17167		1218	0
0	0	0	0.739854	0.665814	-0.0765614	0.004437	0.739854	1.39495	0.288736	2.99235	0.004437	0.013635	1200000000	1054000000	0	8822498	0	1219000000	0	755300000	811700000											0.114737	-47.0622	19.5924	-3.81577	0.28572	C30	1.39495	0.665814	0.022936	0.012595	0.570895	0.720194	0.873654	1	16312	3	1284	0
0	0	0	0.812988	0.691395	-0.0763802	0.009222	0.812988	1.27883	0.124396	3.24039	0.009222	0.02875	1300000000	1183000000	0	10711765	0	1345000000	0	925000000	929900000											0.103252	0.675536	1.64132	1.9629	0.509693	C30	1.27883	0.691395	0.01983	0.028485	0.495239	0.795247	0.452713	2	14415	3	1233	0
1	0	0	1.49676	0.711966	-0.0761943	0.010689	1.49676	1.26779	0.083135	3.47181	0.010689	0.035889	1500000000	1310000000	0	9.69988e+06	0	1474000000	0	1033000000	1049000000											0.095983	-0.966935	-0.835685	-0.810316	0.142365	C30	1.26779	0.711966	0.021467	0.035487	0.559967	0.741081	0.370224	1	10310	3	1242	0
1	0	0	2.91175	0.699066	-0.0761367	0.010279	2.91175	1.37899	0.14564	3.32298	0.010279	0.03509	1500000000	1366000000		7521096		1514000000		990500000	1058000000	1010000000	1010000000	990800000	878900000	12814319	63175812	19029224	21749311	5.92077e+06	15828541	-0.033145	-0.301067	-0.534233	-1.25354	0.044728	C30	1.37899	0.699066	0.023024	0.034742	0.636098	0.667096	0.272228	1	9182	3	1169	0
1	0	0	1.45964	0.754666	-0.0755064	0.016556	1.45964	1.18542	0.211065	4.07608	0.016556	0.061406	2000000000	1741000000		5.01527e+06		1952000000		1469000000	1473000000	1229000000	1229000000	1211000000	1093000000	15376778	74322790	17495306	42243537	13554739	28688799	0.289078	-1.29514	-1.22054	-1.13536	0.157287	C30	1.18542	0.754666	0.023665	0.059918	0.582346	0.629829	0.320871	1	12741	2	1123	0
0	0	0	0.577263	0.434237	-0.024402	0.034919	0.577263	3.15393	0.667346	1.76752	0.034919	0.085902	37000000000	32500000000		94212		37440000000		14220000000	21160000000											0.491089	3.34245	3.46569	3.62941	2.58386	K70	2.28559	0.565149	0.029995	0.067078	0.029995	0.095445	0.161203	2	46218	2	7922	0
0	0	0	0.923555	0.385302	-0.0093377	0.04112	0.923555	3.79849	1.19681	1.62681	0.04112	0.101468	48000000000	42640000000		54121	0	47900000000		23710000000	29600000000											0.279407	0.75036	0.795049	0.844912	1.01125	K70	1.79806	0.617889	0.036309	0.095862	0.011735	0.211656	0.228375	2	94965	2	8911	0
0	0	0	0.449866	0.47203	0.0078305	0.046121	0.449866	3.44655	0.497752	1.89405	0.046121	0.125937	60000000000	53610000000		0	0	59820000000		28510000000	38670000000											0.248889	0.783877	0.660371	0.657453	0.612325	K70	1.88057	0.646497	0.043081	0.117469	0.007444	0.230405	0.240864	2	100483	3	9236	0
0	0	0	0.371112	0.695267	0.036415	0.047503	0.371112	1.86341	0.344242	3.28156	0.047503	0.145872	80000000000	73940000000		0		79670000000		39680000000	55390000000											0.331809	-0.3743	-0.369004	-0.450055	-0.397572	K70	1.86341	0.695267	0.039469	0.136465	0.006059	0.189683	0.262452		62017		10041	0
0	0	0	0.460069	0.730403	0.0789435	0.045297	0.460069	1.57967	0.279215	3.70924	0.045297	0.159263	110000000000	103100000000	0	0	0	109200000000	0	65250000000	79760000000											0.37068	-0.12688	-0.070472	-0.051824	0.508791	K70	1.57967	0.730403	0.042782	0.1453	0.006408	0.231661	0.310022	2	43618	2	12855	0
0	0	0	0.262128	0.709661	0.114721	0.045292	0.262128	1.64164	0.323855	3.44425	0.045292	0.161164	130000000000	122900000000	0	542400000	0	134000000000	0	74830000000	95120000000											0.227508	-0.401613	-0.32854	-0.332374	0.239649	K70	1.64164	0.709661	0.045679	0.141539	0.00236	0.24297	0.308624	2	59052	2	15173	0
1	0	0	0.433173	0.711609	0.140143	0.038566	0.433173	1.75063	0.286438	3.46751	0.038566	0.133307	150000000000	140300000000	0	511500000	0	151700000000	0	80110000000	107900000000											0.131691	2.67436	2.97387	3.06073	1.54761	K70	1.75063	0.711609	0.041723	0.125949	0.001575	0.286007	0.338239	2	56318	2	16720	0
0	0	0	1.2721	0.695731	-0.077432	0.002544	1.2721	0.404805	0.12453	3.28656	0.002544	0.00941	610000000	129000000		244023	0	614500000		318600000	427600000											-0.265858	6.70475	2.91792	1.95165	-0.034133	S90	0.404805	0.695731	0.02363	0.009866	0.020326	1.038	0.157164	1	19446	3	796	549
0	0	0	3.7738	0.750191	-0.0774364	0.013252	3.7738	0.135958	0.001709	4.00305	0.013252	0.042524	610000000	144700000		219922	0	611500000		226800000	416400000											-0.004974	-6.51735	-8.03328	-4.48981	-0.140491	S90	0.638071	0.680975	0.028992	0.041642	0.02037	0.70758	0.060118	2	17698	3	719	545
0	0	0	3.21128	0.749422	-0.0774536	0.006478	3.21128	0.091912	0.001346	3.99078	0.006478	0.019866	600000000	127000000		221588	0	599600000		213600000	399800000											-0.019512	-12.8927	-7.74908	-4.18382	-0.129476	F51	0.594465	0.666757	0.020564	0.019631	0.02286	0.644391	-0.19716		18940		653	573
0	0	0	2.04696	0.747593	-0.0774952	0.002137	2.04696	0.069954	0.00023	3.96186	0.002137	0.006233	570000000	117100000		164089	0	570700000		271600000	369300000											-0.04814	-2.32609	-4.35435	0.927031	0.108398	F51	0.431111	0.647128	0.016747	0.006208	0.017175	0.706653	0.810708		17217		599	319
0	0	0	1.95909	0.688234	-0.0773883	0.001599	1.95909	0.478083	0.192465	3.20753	0.001599	0.00483	640000000	137000000	0	106589	0	644900000	0	286500000	443800000											0.130049	15.0992	21.8317	3.67169	0.044845	F51	0.478083	0.688234	0.017139	0.004834	0.013772	0.650698	0.894775	1	17450	3	578	322
0	0	0	2.60602	0.709393	-0.0773075	0.004485	2.60602	0.514843	0.196235	3.44107	0.004485	0.014912	700000000	165700000	0	33255	0	701000000	0	321900000	497300000											0.086968	-1.97833	-1.54099	-1.43952	-0.145553	F51	0.514843	0.709393	0.028248	0.014815	0.010307	0.694338	0.787155	1	15587	3	578	330
1	0	0	2.58434	0.749071	-0.0771558	0.011366	2.58434	0.416515	0.217225	3.98519	0.011366	0.042193	810000000	153500000	0	53924234	0	806300000	0	368500000	604000000											0.148316	-4.91877	-5.55522	-5.02073	0.124462	F51	0.416515	0.749071	0.032663	0.042338	0.002953	0.576675	0.145548	1	14065	3	527	236
1	0	0	19.8965	0.248214	-0.076634	0.043279	12.9916	1.36986	0.378049	1.33017	0.043279	0.079077	1200000000	359400000	0	52985273	0	1169000000	0	262400000	290100000											0.449376	1.21517	1.02103	0.998099	-0.019135	F51	1.36986	0.248214	0.040287	0.048644	0.001851	0.259891	0.096315	2	76801	3	517	217
1	0	0	12.8591	0.235883	-0.0766047	0.023428	12.8591	1.38609	0.717204	1.3087	0.023428	0.030908	1200000000	345000000		53739119		1189000000		248900000	280500000	324200000	324200000	297500000	229000000	16656674	42446751	-505961	30485330	2.8674e+06	27617933	0.017399	-0.86229	-0.712582	-0.564909	-0.001324	F51	1.38609	0.235883	0.022802	0.030398	0.000351	0.2727	0.094058	2	66362	3	494	0
1	0	0	7.58895	0.28881	-0.0762961	0.050751	7.58895	1.31456	0.407158	1.40609	0.050751	0.069006	1400000000	457800000		52349687		1403000000		348300000	405300000	347200000	347200000	313000000	254300000	16490380	36735284	1.52017e+06	68925403	3.14383e+06	65781569	0.180247	0.760799	0.77108	0.766081	0.406807	F51	1.31455	0.28881	0.047959	0.065912	0.127334	0.247441	0.045612	1	55304	3	320	0
0	0	0	0.738049	0.529802	-0.0762415	0.052294	0.738049	0.844317	0.087519	2.12677	0.052294	0.097766	1400000000	928800000		12896866	0	1441000000		677200000	761700000											0.37847	-0.409184	-0.497975	-0.713652	0.18721	C35	1.37155	0.528519	0.07671	0.095687	0.092544	0.753827	0.124026	1	27868	3	2241	0
0	0	0	1.8588	0.517553	-0.0761224	0.047722	1.8588	1.46579	0.138958	2.07277	0.047722	0.100021	1500000000	1010000000		13476895	0	1524000000		688700000	788700000											0.057418	0.091302	0.048072	-0.16682	0.122821	C35	1.46579	0.517553	0.073618	0.09623	0.09858	0.811974	0.170919	1	23495	1	2379
0	0	0	1.85337	0.471559	-0.0748081	0.047478	1.85337	1.97484	0.635704	1.89236	0.047478	0.092959	2400000000	1906000000		19237532	0	2437000000		965000000	1149000000											0.598845	-0.033736	-0.053453	-0.133725	0.138662	F52	1.97484	0.471559	0.058209	0.07302	0.098776	0.730854	0.171593		16382		3266
0	0	0	1.62781	0.518694	-0.0741467	0.059734	1.62781	1.5336	0.117592	2.07768	0.059734	0.118792	2900000000	2212000000		37065827		2896000000		1443000000	1502000000											0.188479	-0.575612	-0.632729	-0.683129	0.07061	F52	1.5336	0.518694	0.077515	0.114266	0.104996	0.884411	0.168702	2	15616	3	4400
0	0	0	0.883761	0.564416	-0.073526	0.037174	0.883761	1.36483	0.076826	2.29577	0.037174	0.081369	3300000000	2495000000	0	36749627	0	3327000000	0	1828000000	1878000000											0.08661	-0.284071	-0.604603	-0.721611	-0.023087	F52	1.36483	0.564416	0.070433	0.079816	0.102223	0.90898	0.152593	2	25509	1	5017	0
0	0	0	0.773147	0.56759	-0.073192	0.037797	0.773147	1.85161	0.074459	2.31262	0.037797	0.087101	3600000000	2677000000	0	36168612	0	3559000000	0	1446000000	2020000000											0.069719	-0.287886	-0.512059	-0.54665	-0.055493	F52	1.85161	0.56759	0.064741	0.084562	0.104546	0.872087	0.140957	2	28314	3	5112	0
1	0	0	1.01068	0.552603	-0.0730493	0.040492	1.01068	1.83085	0.077707	2.23515	0.040492	0.092025	3700000000	2707000000	0	35502526	0	3658000000	0	1478000000	2021000000											0.027841	-0.523414	-0.595374	-0.775014	-0.07322	F52	1.83085	0.552603	0.068873	0.089279	0.107157	0.896211	0.14256	1	26158	1	5544	0
1	0	0	1.35193	0.457733	-0.0722012	0.03088	1.35193	2.17301	0.439966	1.84411	0.03088	0.061962	4200000000	3148000000	0	36429627	0	4247000000	0	1449000000	1944000000											0.160996	-0.556451	-1.09082	-1.25714	-0.114492	F52	2.17301	0.457733	0.050955	0.052997	0.096365	0.74463	0.099509	1	33608	3	5562	0
1	0	0	1.35524	0.406989	-0.0725494	0.026752	1.35524	1.87429	0.283182	1.68631	0.026752	0.047191	4000000000	2828000000	0	38751903	0	4005000000	0	1509000000	1630000000	2994000000	2994000000	2867000000	1773000000	760500000	201300000	68887565	145000000	34656443	110400000	-0.056932	-0.950823	-0.913709	-1.17373	0.006787	F52	1.87429	0.406989	0.044761	0.046475	0.102433	0.747551	0.238958	2	33751	2	5291	0
1	0	0	1.26254	0.310582	-0.0731616	0.037606	1.26254	2.36628	0.180254	1.4505	0.037606	0.058897	3600000000	2428000000		44223280		3580000000		1026000000	1112000000	3346000000	3346000000	3183000000	1987000000	811400000	240000000	49186743	189700000	47098954	142600000	-0.106147	-0.869146	-0.805951	-0.802666	-0.006801	F52	2.36627	0.310582	0.053579	0.057787	0.097511	0.934639	0.248261	2	35156	2	5362	0
0	0	0	0.609371	0.534477	-0.0359983	0.043185	0.609371	0.739785	0.420116	2.14812	0.043185	0.084788	29000000000	7433000000		1842000000		29380000000		10050000000	15710000000											0.198489	-0.748544	-0.8634	-3.05657	-0.354766	D44	0.739785	0.534477	0.057234	0.085084	0.101621	0.36219	0.123033	2	182089	2	117	0
0	0	0	0.987306	0.412851	-0.0347526	0.077726	0.987306	0.652771	0.441974	1.70314	0.077726	0.157853	30000000000	7730000000		1849000000	0	30250000000		9605000000	14570000000											0.029436	-0.56306	-0.440169	-0.457501	-0.035568	D44	0.804856	0.481501	0.08942	0.147762	0.154197	0.376487	0.18144		171872		137	0
0	0	0	0.764472	0.435322	-0.0364518	0.054482	0.764472	1.12152	0.443075	1.77092	0.054482	0.100682	29000000000	6935000000		1850000000	0	29070000000		6184000000	12650000000											-0.039004	-0.866936	-0.936687	-1.49788	-0.108897	D44	1.12152	0.435322	0.066242	0.098442	0.148147	0.428783	0.182848		164377		127	0
0	0	0	0.51167	0.462982	-0.0329391	0.039051	0.51167	1.05764	0.495807	1.86213	0.039051	0.070965	32000000000	9236000000		1774000000		31510000000		8733000000	14590000000											0.083905	-0.801207	-0.838627	-1.14847	-0.130236	D44	1.05764	0.462982	0.050529	0.069904	0.131824	0.456599	0.243145		149347		3545
0	0	0	0.488427	0.341502	-0.0317148	0.035588	0.488427	0.777363	0.529266	1.51861	0.035588	0.06594	32000000000	9548000000	0	3037000000	0	32360000000	0	9704000000	14810000000											0.02698	-0.687778	-0.535875	-0.729988	-0.22519	D44	0.983918	0.457686	0.048792	0.064761	0.10794	0.39644	0.295731	1	141800	2	3402
0	0	0	0.435308	0.435835	-0.0302252	0.052823	0.435308	0.854566	0.34944	1.77253	0.052823	0.09545	33000000000	9814000000	0	2945000000	3.83447e+06	33390000000	0	11480000000	14550000000											0.031963	0.266301	-0.002525	-0.588616	-0.203142	D44	0.854566	0.435835	0.066045	0.092181	0.159715	0.369856	0.216816	2	136458	2	3467
1	0	0	0.767293	0.470503	-0.0229555	0.065041	0.767293	0.868368	0.407663	1.88859	0.065041	0.119207	38000000000	12410000000	0	3401000000	9.69387e+06	38440000000	0	14290000000	18090000000											0.151164	0.031134	-0.037734	-0.301669	-0.106942	D44	0.868368	0.470503	0.076511	0.11477	0.201148	0.325328	0.199243	1	118241	2	3722
1	0	0	0.669767	0.571741	0.005309	0.042643	0.669767	0.88224	0.531794	2.33504	0.042643	0.091003	58000000000	15930000000	0	3746000000	16613793	58070000000	0	18060000000	33200000000											0.510545	-0.68	-0.640255	-0.714514	-0.230374	D44	0.88224	0.571741	0.047612	0.082745	0.250606	0.191673	0.212635	2	157963	2	4805	0
1	0	0	0.447504	0.592068	0.0093339	0.023655	0.447504	0.733534	0.321196	2.45139	0.023655	0.05661	61000000000	13100000000		3910000000	48137248	60860000000		17850000000	36030000000	11320000000	11320000000	9781000000	8044000000	108400000	616900000	821000000	2042000000	635200000	1407000000	0.04813	-1.06045	-0.861147	-0.932579	-0.250953	D44	0.733534	0.592068	0.036601	0.056656	0.315288	0.185963	0.311103	2	136767	2	5333	0
1	0	0	0.311078	0.679887	0.0329074	0.012239	0.311078	0.718816	0.299385	3.1239	0.012239	0.034109	77000000000	17570000000		4078000000	50957560	77230000000		24440000000	52510000000	15550000000	15550000000	14460000000	11270000000	143300000	790600000	1523000000	1307000000	462400000	845100000	0.268948	-1.08259	-0.795547	-0.748508	0.193976	D44	0.718816	0.679887	0.030661	0.034182	0.300403	0.201291	0.353639	1	127531	2	5845	0
0	0	0	1.12026	0.823731	-0.0730116	0.049303	1.12026	1.04502	0.116308	5.67315	0.049303	0.278426	3700000000	3102000000		57607283	0	3684000000		2968000000	3035000000											0.265496	-0.265174	-0.193117	-0.199039	0.036822	C27	1.04503	0.823731	0.058627	0.250172	0.206536	2.26938	0.201691	2	18022	2	4164	124
0	0	0	1.40162	0.656577	-0.07078	0.044465	1.40162	0.85848	0.114263	2.91186	0.044465	0.259587	5200000000	4423000000		116200000	235375	5233000000		4252000000	4355000000											0.326625	0.01335	0.028663	0.056266	0.009626	C27	1.04038	0.832209	0.047676	0.225774	0.222698	2.09228	0.239764	2	13916	2	3550	116
0	0	0	1.3956	0.698585	-0.0692343	0.045792	1.3956	0.642314	0.078971	3.31768	0.045792	0.262965	6300000000	5249000000		129200000	2.58066e+06	6307000000		5042000000	5175000000											0.197112	0.266826	0.129135	-0.010987	-0.009765	F51	1.04105	0.820599	0.054982	0.233528	0.219437	2.07149	0.22244	2	15264	2	4187
0	0	0	0.733599	0.653156	-0.0672772	0.046923	0.733599	0.733256	0.092876	2.88314	0.046923	0.256281	7700000000	6471000000		119600000	3.99843e+06	7666000000		6027000000	6239000000											0.215477	-0.022039	-0.207469	-0.202818	0.020622	F51	1.07372	0.813874	0.060557	0.229755	0.236045	1.97376	0.199047	1	14318	2	4060
0	0	0	1.00955	0.802164	-0.0649296	0.057033	1.00955	1.10289	0.12914	5.05469	0.057033	0.296206	9300000000	7863000000	0	155200000	5.00244e+06	9296000000	0	7130000000	7457000000											0.210504	-0.017304	-0.099766	-0.292649	-0.037934	F51	1.10289	0.802164	0.069472	0.263006	0.243914	1.93762	0.198295	2	11339	2	4171	587
0	0	0	1.1171	0.790499	-0.062392	0.052493	1.1171	1.11488	0.129317	4.77325	0.052493	0.257103	11000000000	9466000000	0	150600000	5.61932e+06	11060000000	0	8490000000	8741000000											0.189553	-0.089661	-0.134658	-0.140811	-0.003883	F51	1.11488	0.790499	0.063179	0.230601	0.267726	1.91713	0.189474	2	10613	2	4280	665
1	0	0	1.26667	0.621854	-0.0598414	0.056085	1.26667	1.42982	0.111113	2.64448	0.056085	0.186901	13000000000	10990000000	0	144400000	5.61932e+06	12830000000	0	7688000000	7978000000											0.160161	-0.057556	-0.07604	-0.101526	-0.035377	F51	1.42982	0.621854	0.061811	0.138077	0.292987	1.86721	0.192265	2	13867	2	4594
1	0	0	1.0731	0.581754	-0.0476234	0.074245	1.0731	1.45727	0.259639	2.39093	0.074245	0.17705	21000000000	17680000000		320400000		21310000000		12140000000	12400000000	41250000000	41250000000	39920000000	36650000000	2198000000	859700000	101900000	1600000000	318400000	1282000000	0.0492	1.88893	2.00235	1.94615	1.70403	F51	1.45727	0.581754	0.064925	0.143806	0.185564	1.93539	0.198954	1	13506	3	21192	1836
1	0	0	1.0851	0.55569	-0.0461388	0.052993	1.0851	1.51034	0.302838	2.25068	0.052993	0.122786	22000000000	18320000000		325800000		22340000000		12130000000	12420000000	41260000000	41260000000	40090000000	36820000000	2306000000	736000000	110400000	1466000000	309300000	1157000000	0.048183	0.087378	0.107588	0.096148	-0.071509	F51	1.51034	0.55569	0.05671	0.116519	0.183925	1.84677	0.210971	2	18357	2	22480	1934
0	0	0	1.0849	0.47162	-0.0750542	0.008386	1.0849	1.86338	0.410449	1.89258	0.008386	0.016107	2300000000	1357000000		6430760		2266000000		728500000	1069000000											-0.016098	-0.272159	0.198113	0.979447	0.774223	K70	1.86338	0.47162	0.02148	0.016001	0.021157	0.311612	0.533177	2	104002	3	1926	313
0	0	0	2.02076	0.638325	-0.0734765	0.007186	2.02076	1.64375	0.241004	2.76491	0.007186	0.016759	3400000000	2557000000		6232380		3361000000		1555000000	2145000000											0.483504	1.5351	2.35737	2.41164	0.818626	K70	1.64375	0.638325	0.017826	0.016631	0.019638	0.223195	0.441204		104844		1905	342
0	0	0	1.33661	0.615344	-0.0734506	0.025154	1.33661	2.6622	0.366559	2.59973	0.025154	0.067401	3400000000	2696000000		6.21327e+06	0	3379000000		1013000000	2079000000											0.005349	-0.412517	0.513732	0.590221	0.66108	K70	2.6622	0.615344	0.042328	0.065219	0.016799	0.302169	0.24255		95338		1862	371
0	0	0	0.955055	0.559467	-0.0736565	0.030596	0.955055	1.6003	0.116578	2.26998	0.030596	0.07496	3200000000	2577000000		6.19609e+06	0	3236000000		1526000000	1836000000											-0.042308	-0.355318	-0.347696	-0.39129	-0.048593	K70	1.68863	0.567289	0.03648	0.072269	0.018648	0.317168	0.240695	1	86756	3	1786	393
0	0	0	1.0607	0.617205	-0.0729701	0.030754	1.0607	1.84184	0.144898	2.61236	0.030754	0.073505	3700000000	3058000000	0	5.86611e+06	0	3713000000	0	1345000000	2206000000											0.142187	0.855572	0.771616	0.78629	0.240686	K70	2.27408	0.594074	0.029503	0.0709	0.023699	0.277461	0.221503	1	84411	1	1777	398
0	0	0	0.858632	0.588383	-0.0722467	0.057599	0.858632	2.16224	0.313742	2.42945	0.057599	0.140845	4200000000	3579000000	0	6.75357e+06	0	4215000000	0	1655000000	2480000000											0.135297	58.2978	47.3967	97.1246	9.63935	K70	2.16224	0.588383	0.053795	0.131595	0.006663	0.502119	0.248646	1	78539	1	1736	417
1	0	0	1.48214	0.535301	-0.0720162	0.069395	1.48214	2.03624	0.361886	2.15193	0.069395	0.1582	4400000000	3771000000	0	6.20123e+06	0	4375000000	0	1852000000	2342000000											0.037959	9.80259	8.80964	9.04135	3.28977	K70	2.03624	0.535301	0.075855	0.146602	0.039576	0.487374	0.256084	1	66337	3	1839
1	0	0	2.91771	0.472851	-0.0722973	0.070384	2.91771	2.25991	0.738587	1.897	0.070384	0.142129	4200000000	3579000000	0	5654820	0	4180000000	0	1584000000	1976000000											-0.044607	0.408261	0.401968	0.386505	0.20517	K70	2.2599	0.472851	0.079771	0.136635	0.052023	0.517559	0.265515	1	71731	3	1785	441
0	0	0	31.3351	96.9593	-0.0782912	-0.050439	12.9916	0.003728	3e-05	-0.010421	-3.77467	0.050655	18000000	3.75426e+06		0	0	17961178		1007000000	1742000000											-0.338563	6.18848	6.18848	-0.512494	0	C41	0.003728	96.9593	-3.10297	0.049403	0	0.094619	0	2	15887	3	9	0
0	0	0	48.6613	41.9394	-0.0782567	0.133447	12.9916	0.028782	2.2e-05	-0.024426	0.270756	-0.004713	42000000	29427164		1300000	0	41891434		1022000000	1757000000											1.42131	-1.30157	-1.30157	-0.441787	0	C41	0.028782	41.9394	0.940639	-0.004725	0	0.044257	0		12669		8	0
0	0	0	31.383	0.969146	-0.0782218	0.133447	12.9916	1.03184	0.023156	32.4108	20.7876	-1.38588	66000000	66169348		0	0	66169348		64127765	64127765											-0.104853	-0.417611	-0.417611	-3.59748		C41	1.03184	0.969146	22.0029	713.204	0	0.001647	0	2	24670	3	8	0
0	0	0	92.1088	1.06695	-0.0782816	-0.050439	12.9916	0.937249	0.006374	-14.9361	-0.081278	-18.7188	25000000	24606158	0	0	0	24606158	0	26253591	26253591											-0.628134	1.68985	1.68985	1.45784		C41	0.937249	1.06695	-0.152843	2.23925			0	2	23023	3	5	3
0	0	0	1.10024	0.402571	-0.0680771	0.133447	1.10024	1.44907	0.139648	1.67384	0.165489	0.278069	7100000000	3206000000	0	300700000	0	7110000000	0	2212000000	2862000000											0.134041	0.058309	0.082741	0.129857	0.127177	C41	1.44907	0.402571	0.083797	0.13898	0.213539	0.735239	0.050892	2	25081	2	6371	0
1	0	0	1.48927	0.345046	-0.0678455	0.093511	1.48927	1.69315	0.293973	1.52683	0.093511	0.149257	7300000000	3247000000	0	252600000	0	7271000000	0	1918000000	2509000000											0.02261	0.046643	-0.00924	-0.173474	0.010848	C36	1.69315	0.345046	0.094751	0.141197	0.205705	0.689029	0.04284	2	27832	2	6344	0
1	0	0	1.61494	0.343888	-0.0666729	0.068368	1.61494	1.92705	0.474869	1.52413	0.068368	0.104289	8100000000	3744000000	0	276500000	0	8085000000	0	1943000000	2780000000											0.111986	0.895237	0.669872	0.755011	0.391913	C36	1.92705	0.343888	0.065658	0.098955	0.276521	0.535722	0.020907	2	43112	2	7080	527
1	0	0	1.20127	0.3635	-0.0652505	0.078868	1.20127	1.75166	0.473297	1.57109	0.078868	0.122135	9100000000	4377000000		296800000		9073000000		2499000000	3298000000	5857000000	5857000000	5654000000	4767000000	241700000	571100000	-9.78704e+06	705800000	29212114	676600000	0.122148	0.002254	0.058228	0.076058	0.235995	C36	1.75166	0.3635	0.073496	0.117164	0.225724	0.645536	0.041387	2	35383	2	6975	618
1	0	0	1.00168	0.389791	-0.0633908	0.08426	1.00168	1.68676	0.467493	1.63878	0.08426	0.135361	10000000000	5360000000		296600000		10360000000		3177000000	4040000000	7193000000	7193000000	6843000000	5861000000	282900000	632300000	-10639909	879400000	60550017	818900000	0.14233	-0.06312	-0.231435	0.076883	0.254516	C36	1.68676	0.389791	0.077984	0.129481	0.221965	0.694039	0.06885	2	34180	2	6968	742
0	0	0	0.962234	0.637839	-0.0652871	0.018355	0.962234	1.65289	0.295984	2.76121	0.018355	0.039863	9000000000	7223000000		45403448	0	9048000000		4370000000	5771000000											0.505674	-8.92521	-28.2131	-49.7662	5.38818	K70	1.65289	0.637839	0.020914	0.042171	0.025949	0.120125	0.314089	2	143840	2	1455	0
0	0	0	1.53291	0.501281	-0.0591813	0.03366	1.53291	1.93893	0.235105	2.00514	0.03366	0.077189	13000000000	8341000000		25381601	0	13290000000		4164000000	6824000000											0.468594	0.82104	1.01429	1.0328	7.0552	K70	2.00301	0.513593	0.032761	0.058161	0.060037	0.151539	0.164372	2	232192	3	1513
0	0	0	0.560115	0.696077	-0.0492639	0.033149	0.560115	1.82117	0.273518	3.29031	0.033149	0.088072	20000000000	16650000000		27837875	0	20170000000		9142000000	14040000000											0.410723	6.1989	6.14201	6.26049	13.8419	K70	1.82117	0.696077	0.03416	0.090455	0.032689	0.104769	0.255553		189970		1692
0	0	0	0.2114	0.781679	-0.0313643	0.027761	0.2114	1.55074	0.199007	4.58041	0.027761	0.110583	33000000000	29820000000		27890540	0	32600000000		19230000000	25480000000											0.566793	7.83361	6.04421	6.12753	4.46015	K70	1.55074	0.781679	0.033097	0.102919	0.047296	0.169958	0.317033		165130		1887
0	0	0	0.226986	0.782565	-0.0281441	0.02018	0.226986	1.55621	0.283802	4.59908	0.02018	0.092626	35000000000	32040000000	0	31653765	0	34840000000	0	20590000000	27260000000											0.068583	13.8667	8.50233	8.81563	2.56227	K70	1.55621	0.782565	0.030233	0.08983	0.048141	0.228049	0.322105	1	157846	3	2442
0	0	0	0.165726	0.779069	-0.0198429	0.024368	0.165726	1.50023	0.237447	4.5263	0.024368	0.11111	41000000000	36970000000	0	59870116	0	40600000000	0	24650000000	31630000000											0.16011	6.62821	4.68215	4.54376	2.82892	K70	1.50023	0.779069	0.033443	0.102469	0.019175	0.250689	0.250522	1	145202	3	2540
1	0	0	0.331325	0.769711	-0.0116214	0.020775	0.331325	1.71862	0.305583	4.34236	0.020775	0.091957	46000000000	40660000000	0	61763751	0	46310000000	0	23660000000	35650000000											0.1406	84.7072	71.2296	98.0243	3.30501	K70	1.71863	0.769711	0.027898	0.084651	0.02509	0.195218	0.357993	1	131105	3	2773
1	0	0	0.460632	0.79961	0.0013547	0.019703	0.460632	1.87039	0.349286	4.99027	0.019703	0.092062	55000000000	49550000000	0	34547627	0	55320000000	0	26490000000	44240000000											0.194556	-0.178223	-0.195005	-0.230783	0.737092	K70	1.87039	0.79961	0.026731	0.090315	0.011872	0.244019	0.285112	1	251535	3	2859
1	0	0	0.264022	0.815795	0.0099312	0.022873	0.264022	1.64571	0.4245	5.42873	0.022873	0.1192	61000000000	52330000000		56955165		61280000000		31800000000	49990000000	18030000000	18030000000	15850000000	11850000000	541000000	434300000	504100000	2234000000	900700000	1333000000	0.074609	14.7677	8.87172	9.39653	0.827077	K70	1.64571	0.815795	0.029987	0.118136	0.011825	0.294159	0.403142	1	209478	3	3122	256
0	0	0	0.876508	0.325718	-0.0763581	0.051261	0.876508	1.48092	0.347443	1.48306	0.051261	0.100995	1400000000	932600000		45863119	0	1360000000		554200000	562000000											-0.25861	-0.557679	-0.429152	-0.737149	-0.234891	C39	1.68268	0.413141	0.086215	0.102582	0.084193	1.25205	0.234427	2	30735	3	2230	112
0	0	0	1.39725	0.448143	-0.0762457	0.03455	1.39725	1.65402	0.528954	1.81206	0.03455	0.060734	1400000000	1057000000		44526716	247854	1438000000		638900000	644500000											0.057359	7.15463	8.34899	6.43522	1.13096	C39	1.65403	0.448143	0.03489	0.060908	0.082653	0.866797	0.306058		27157		1380	121
0	0	0	1.53059	0.461773	-0.076172	0.032906	1.53059	1.63925	0.396249	1.85795	0.032906	0.060387	1500000000	1127000000		43541782	0	1489000000		687800000	687800000											0.035586	-0.502976	-0.451363	-0.357162	-0.097436	C39	1.63925	0.461773	0.031597	0.060088	0.08435	1.00363	0.278584		27844		1744	136
0	0	0	0.850562	0.359824	-0.0760499	0.0293	0.850562	1.47219	0.454374	1.56207	0.0293	0.053714	1600000000	974500000		311800000	0	1574000000		699300000	704700000											-0.119322	3.88827	3.56515	2.68737	-0.165253	C39	1.39345	0.447662	0.035826	0.051619	0.051506	1.0939	0.323045		24865		1365
0	0	0	1.00467	0.380335	-0.0758803	0.109596	1.00467	1.80338	0.546894	1.61378	0.109596	0.186636	1700000000	1151000000	0	301800000	0	1692000000	0	638200000	643500000											0.074825	4254.92	128.736	153.068	0.552598	C39	1.80338	0.380335	0.111666	0.170706	0.092178	0.896493	0.231029	1	23420	3	1264	143
0	0	0	1.34469	0.32395	-0.0761548	0.009401	1.34469	2.03954	0.500991	1.47918	0.009401	0.014549	1500000000	980900000	0	291000000	0	1501000000	0	480900000	486400000											-0.112648	23.0257	-2.89554	-27.6367	0.344669	C39	2.03954	0.32395	0.01194	0.014789	0.051503	1.08261	0.625637	1	19047	3	1221	145
1	0	0	0.925761	0.460739	-0.0743323	0.044921	0.925761	1.69125	0.288943	1.85439	0.044921	0.076478	2800000000	2129000000	0	292400000	0	2767000000	0	1259000000	1275000000											0.842883	-38.0691	-63.4031	-44.5686	5.39119	C39	1.69125	0.460739	0.0358	0.064252	0.27536	1.10983	0.26238	2	16223	3	1140	150
1	0	0	4.23763	0.290364	-0.0752557	0.020219	4.23763	2.58095	0.88651	1.40917	0.020219	0.032968	2100000000	1519000000	0	287800000	0	2126000000	0	588700000	617200000											-0.231732	-1.06707	-0.892921	-1.49802	-0.472202	F51	2.58095	0.290364	0.01786	0.032788	0.100342	0.926764	0.402603	2	19484	2	1524	158
1	0	0	3.22616	0.20752	-0.075501	0.022424	3.22616	3.60371	1.01207	1.26186	0.022424	0.029925	2000000000	1385000000		272300000		1955000000		384300000	405800000	1987000000	1987000000	1933000000	1710000000	49156811	164000000	-12060814	71046433	25289476	45756957	-0.080124	-1.26877	-0.682964	-0.973268	-0.049747	F51	3.60371	0.20752	0.017232	0.029528	0.117829	1.01631	0.355957	2	20792	2	1460	159
1	0	0	2.20401	0.186046	-0.0755414	0.006731	2.20401	4.14845	0.974169	1.22857	0.006731	0.008381	1900000000	1407000000		256900000		1927000000		339200000	358600000	1721000000	1721000000	1702000000	1409000000	63004769	142400000	-17905978	36822863	23755948	13066915	-0.014358	-2.34087	-1.78689	-1.95584	0.480849	F51	4.14845	0.186046	-0.002511	0.008329	0.095733	0.892974	0.645141	1	24645	2	1261	166
0	0	0	1.96999	0.337881	-0.0776476	0.00729	1.96999	0.51358	0.071527	1.5103	0.00729	0.011524	460000000	37839244		251377	0	464800000		73677400	157100000											-0.075388	-0.958554	-0.785593	-0.210482	0.072427	H61	0.51358	0.337881	0.028443	0.011458	0.288206	0.147663	0.396372	2	40645	3	330	0
0	0	0	4.86767	0.429651	-0.0776007	-0.049971	4.86767	1.49394	0.706497	1.75331	-0.049971	-0.081287	500000000	87176987		207991	0	497400000		58259961	213600000											0.070004	2.52091	2.52091	2.6447	0.147217	H61	1.49635	0.429536	-0.028354	-0.084731	0.166884	0.124566	0	2	40506	3	318
0	0	0	3.39975	0.447815	-0.077558	0.008141	3.39975	2.30471	1.63346	1.81099	0.008141	0.014509	530000000	128300000		114841	0	527100000		55650912	236000000											0.055718	-4.75594	-4.70922	-1.70225	0.264099	H61	2.30471	0.447815	0.027025	0.014327	0.182168	0.135652	-0.048554		41439		303
0	0	0	2.31122	0.431216	-0.077574	0.005399	2.31122	2.08882	1.31777	1.75814	0.005399	0.009628	520000000	125000000		217684	0	515900000		59438307	222100000											-0.021152	-15.6433	-15.3048	-8.40315	-0.414742	H61	2.10304	0.430425	0.030301	0.009582	0.150258	0.140483	-0.064394		36870		296
0	0	0	2.99452	0.428603	-0.0776406	-0.050439	2.99452	1.54038	0.225869	1.7501	-0.05169	-0.090614	470000000	98567324	0	287948	0	469700000	0	63988829	201300000											-0.0896	7.14397	5.83154	5.90646	0.028682	H61	1.54038	0.428603	-0.030139	-0.094915	0.196337	0.142663	-0.117549	1	32467	3	291
0	0	0	2.25066	0.518756	-0.0775035	0.006739	2.25066	1.66901	1.28492	2.07795	0.006739	0.012906	560000000	95334946	0	224039	0	564900000	0	57120595	293100000											0.202756	-3.45126	-3.45126	-2.83281	0.078716	H61	1.66901	0.518756	0.036796	0.012823	0.090264	0.142109	0	1	30820	3	302	0
0	0	0	3.55239	2.74817	-0.0780515	-0.050439	3.55239	0.052817	5.7e-05	-0.572026	-1.0981	0.287205	180000000	131300000		4.12521e+06	0	184400000		850700000	1317000000											-0.408589	14.5752	14.5758	25.6424	0.183175	S90	0.154394	7.14395	-1.25029	0.248454	0.052462	1.51684	-0.000525		32624		1041
0	0	0	20.8908	2.81767	-0.0780999	0.133447	12.9916	0.051228	9.6e-05	-0.550154	0.734655	-0.126976	150000000	105400000		4.00021e+06	0	150800000		682900000	957200000											-0.182292	25.1649	24.8215	24.7171	-0.358766	S90	0.154338	6.34771	1.00093	-0.15269	0.052988	2.25055	0.005838		22810		1095	0
0	0	0	15.692	0.088962	-0.078045	0.133447	12.9916	1.53274	0.724819	1.09765	2.93301	-1.34572	190000000	147200000		3.8752e+06	0	188900000		119400000	122800000											0.252633	-0.960697	-0.959311	-3.88043	0.084092	S90	1.23216	0.650283	2.63941	7.54108	0.06348	2.12911	0.00236	2	28514	2	1153	0
0	0	0	6.74155	0.073516	-0.078018	0.083742	6.74155	1.4747	0.465545	1.07935	0.083742	0.21937	210000000	148700000		8.29476e+06	0	207600000		119700000	122300000											0.099168	0.156055	0.869266	-0.769785	0.054936	S90	1.2419	0.589127	0.081001	0.194621	0.067426	2.08886	0.17262		33644		1073	0
0	0	0	7.54594	0.538522	-0.0780383	0.020015	7.54594	1.17253	0.32691	2.16695	0.020015	0.045982	190000000	109900000	0	8.73073e+06	0	193600000	0	93693027	104200000											-0.067755	18.4109	8.11977	-1.06373	-0.002601	S90	1.17253	0.538522	0.021412	0.044948	0.028834	2.36261	0.22408	2	33934	2	1095
0	0	0	3.98473	0.719504	-0.0777724	0.05865	3.98473	1.02673	0.220912	3.56511	0.05865	0.17161	380000000	272600000	0	4.92622e+06	0	378200000	0	265500000	272100000											0.954054	12.3613	7.77961	11.9973	0.090407	S90	1.02673	0.719504	0.045377	0.158049	0.026754	1.40942	0.115502	1	29542	2	1086
1	0	0	5.30368	0.641221	-0.0776522	0.133447	5.30368	0.886393	0.099413	2.78723	0.146381	0.452454	460000000	260400000	0	4740199	0	461700000	0	293800000	296000000											0.220662	1.1663	0.976713	0.961572	-0.016309	S90	0.886393	0.641221	0.134254	0.371121	0.045017	1.10264	0.026013	1	29059	2	1078
1	0	0	22.333	0.582597	-0.0776719	0.046969	12.9916	1.31811	0.438339	2.39577	0.046969	0.121163	450000000	343800000	0	4.54012e+06	0	448000000	0	260900000	261000000											-0.029588	-2.37654	-1.7343	-1.73665	0.033957	S90	1.31811	0.582597	0.047214	0.114242	0.05057	1.02244	0.129641	1	34242	3	936
1	0	0	0.856882	0.844418	-0.0537809	0.046071	0.856882	1.22303	0.084073	6.42749	0.046071	0.283883	17000000000	15610000000		52615806		17040000000		12760000000	14390000000	40530000000	40530000000	40330000000	38550000000	1178000000	292600000	416800000	497700000	94942279	402800000	37.0287	-0.149061	-0.184846	-0.038279	0.379518	F51	1.22303	0.844418	0.048104	0.151955	0.163377	2.37898	0.190752	2	27964	2	4217	0
0	0	0	0.844744	3.29516	-0.0775447	-0.019695	0.844744	0.021511	0.000417	-0.435699	-0.019695	0.008125	540000000	33185395		7.81896e+06	0	536300000		1543000000	1767000000											0.12849	-7.21731	-7.21731	-6.03022	-0.984462	C39	0.021511	3.29516	0.08508	0.008093	1.67793	0.015504	0	2	21025	3	40	0
0	0	0	1.8837	3.27272	-0.0775257	-0.033075	1.8837	0.051081	0.000374	-0.440001	-0.033075	0.014482	550000000	80410319		7.62982e+06	0	549500000		1574000000	1798000000											0.024604	5.62687	5.62687	-6.98771	-0.060253	C39	0.051081	3.27272	0.110982	0.014378	2.39396	0.010278	0	2	14770	3	39	0
0	0	0	1.68351	3.01297	-0.0774599	0.081736	1.68351	0.049847	0.000362	-0.496779	0.081736	-0.038176	600000000	77791586		7.44069e+06	0	595200000		1564000000	1797000000											0.083232	-11.9656	-11.9656	1.73806	-0.008623	C39	0.049724	3.0195	0.204493	-0.038919	2.56071	0.008879	0		11573		38	0
0	0	0	192.9	-0.194698	-0.078302	0.133447	12.9916	-5.13165	-5.05547	0.837032	7.10894	-1.22627	10000000	10432755	0	0	0	10441933	0	-2.03302e+06	-2.03302e+06											-0.966087	-1.00163	-1.00163	-0.624921		C39	-5.13164	-0.194698	108.352	90.7055	0	3.91909	0	1	14172	2	13	0
1	0	0	2.39212	0.504266	-0.0736045	0.106628	2.39212	0.932885	0.320281	2.01721	0.106628	0.214132	3300000000	864200000	0	655200000	0	3272000000	0	926400000	1650000000											0.608382	0.946755	0.869647	0.911627	1.34609	N77	0.932885	0.504266	0.065631	0.107889	0.188553	0.168353	0.096217	2	16591	2	919
1	0	0	2.16092	0.579366	-0.0719818	0.059493	2.16092	0.695914	0.203989	2.37737	0.059493	0.131428	4400000000	682700000	0	1797000000	22275360	4399000000	0	981000000	2549000000											0.344328	0.977233	0.946058	1.1054	0.930485	N77	0.695914	0.579366	0.071343	0.123324	0.17247	0.187632	0.155464	2	32538	2	1258	0
1	0	0	1.51968	0.65617	-0.0696783	0.040726	1.51968	0.36646	0.090182	2.90842	0.040726	0.10822	6000000000	789100000		1746000000	31971658	5998000000		2153000000	3936000000	980500000	980500000	789500000	540800000	1.31471e+06	111000000	116800000	250400000	38636464	211700000	0.363597	0.212233	0.36606	0.789205	0.949834	N77	0.36646	0.65617	0.054761	0.102656	0.171446	0.163458	0.154323	2	43094	2	1491	0
0	0	0	0.728718	0.536554	-0.073897	-0.049944	0.728718	2.08505	0.7457	2.15775	-0.049944	-0.201491	3100000000	2506000000		11202952		3069000000		1202000000	1647000000											-0.771632	-0.473107	-0.482152	-0.491125	-0.292877	C17	2.08505	0.536554	-0.130087	-0.289538	0.012201	0.041844	-0.007493	2	178805	3	615
0	0	0	2.35734	0.441038	-0.0738266	0.133447	2.35734	2.73574	1.5319	1.78903	0.141081	0.275774	3100000000	2396000000		9.80068e+06		3118000000		875700000	1375000000											0.015924	-0.666551	-0.151326	-0.1799	-0.455427	C17	2.73574	0.441038	0.145449	0.25042	0.000758	0.615668	0.295485	2	116900	3	603
0	0	0	1.05789	0.100795	-0.0723042	0.083314	1.05789	3.53277	3.26826	1.11209	0.083314	0.155093	4200000000	3481000000		8.4513e+06		4175000000		1531000000	2000000000											0.339044	23.4556	22.704	22.7935	9.90014	K70	2.27371	0.47908	0.073446	0.139688	0.00161	0.267149	0.279462		125404		572
0	0	0	0.718747	0.051471	-0.0727548	0.024429	0.718747	5.23864	4.07265	1.05426	0.024429	0.043888	3900000000	2974000000		9.27318e+06		3862000000		1046000000	1563000000											-0.074937	-0.820827	-0.775255	-0.759879	-0.302184	K70	2.84246	0.40477	0.027285	0.042704	0.008168	0.131199	0.270331		122092		740
0	0	0	0.919181	0.430298	-0.0721716	0.02124	0.919181	3.20559	1.16598	1.7553	0.02124	0.036505	4300000000	3392000000	0	7473845	0	4267000000	0	1058000000	1836000000											0.10485	1.16621	1.58766	1.6528	0.098933	K70	3.20559	0.430298	0.021026	0.035513	0.018455	0.08158	0.261637	1	122549	3	529
0	0	0	0.771421	0.395484	-0.0722743	0.02715	0.771421	2.55916	0.962258	1.65421	0.02715	0.046256	4200000000	3296000000	0	6.43011e+06	0	4196000000	0	1288000000	1659000000											-0.016722	-0.792597	-0.755745	-0.719449	0.048196	K70	2.55916	0.395484	0.032012	0.045294	0.025837	0.045904	0.114724	2	113983	3	520
1	0	0	1.11677	0.454282	-0.0717371	0.006876	1.11677	4.06082	0.253227	1.83245	0.006876	0.011983	4600000000	3547000000	0	6.76242e+06	0	4569000000	0	873500000	2076000000											0.088906	-87.8165	68.7123	80.2144	0.161339	K70	4.06082	0.454282	0.010878	0.012086	0.017003	0.044927	0.465876	1	103207	3	595	61
1	0	0	1.5827	0.584915	-0.0690083	0.017166	1.5827	3.1954	0.713401	2.40915	0.017166	0.036588	6500000000	5328000000	0	6183930	0	6464000000	0	1668000000	3781000000											0.414718	5.10912	6.05683	6.19646	3.59368	K70	3.1954	0.584915	0.016773	0.035295	0.007336	0.06328	0.220457	2	73974	3	733	61
1	0	0	0.987176	0.586168	-0.0643109	0.133447	0.987176	1.46269	0.54676	2.41644	0.167159	0.403441	9700000000	7589000000		9.29415e+06		9725000000		5189000000	5701000000	2172000000	2172000000	1297000000	613900000	49987521	101900000	5.64187e+06	1791000000	437700000	1353000000	0.50462	18.3362	18.5861	18.6	42.8422	K70	1.46269	0.586168	0.139708	0.336194	0.000934	0.223305	0.24441	2	64771	3	811	62
1	0	0	1.18356	0.417036	-0.0657608	0.133447	1.18356	2.26883	0.461774	1.71537	0.148815	0.301378	8700000000	6528000000		7.78802e+06		8719000000		2877000000	3636000000	3972000000	3972000000	2397000000	1262000000	81184676	81361568	3.76722e+06	1602000000	229400000	1372000000	-0.103523	5.57643	5.42677	5.07464	4.19213	K70	2.26883	0.417036	0.15784	0.270013	0.006739	0.455546	0.143222	2	75584	3	810	97
0	1	0	0.310428	0.443846	-0.0711365	0.002815	0.310428	1.60161	0.022985	1.79806	0.002815	0.007803	5000000000	2148000000		84312024		4986000000		2768000000	3050000000											-0.102104	-5.98162	-1.83116	-0.594904	-0.616677	D44	0.775778	0.611732	0.034412	0.007663	0.107679	0.633091	0.770942		34853		367	0
0	1	0	0.697528	0.515619	-0.071222	0.024214	0.697528	1.22852	0.021532	2.06449	0.024214	0.060129	4900000000	2080000000		58188189		4927000000		2711000000	2871000000											-0.011902	-1.67857	-1.5953	2.18099	-0.376316	D44	0.767418	0.582695	0.049729	0.058374	0.181888	0.379132	0.09067		47252		363	0
0	1	0	0.467988	0.633932	-0.0707145	-0.024189	0.467988	0.795866	0.187436	2.73173	-0.024189	-0.061897	5300000000	2511000000		64236932	0	5279000000		3155000000	3346000000											0.071522	-0.299219	-0.022615	-0.01893	-0.163808	D44	0.795866	0.633932	0.000921	-0.063874	0.323645	0.303418	-0.251281		45268		347	0
0	1	0	0.304108	0.622591	-0.0704643	0.001683	0.304108	1.27036	0.111733	2.64964	0.001683	0.004728	5500000000	3044000000		63807539		5453000000		3534000000	3565000000											0.032922	-3.49108	-3.60161	-0.418505	0.035271	D44	0.861418	0.653787	0.039123	0.004784	0.386884	0.443046	0.59419		44421		327	0
0	1	0	0.351251	0.688802	-0.0703443	-0.042772	0.351251	0.881219	0.140373	3.21339	-0.042772	-0.130174	5500000000	3307000000	0	62471514	0	5536000000	0	3753000000	3813000000											-0.074615	-0.9833	-1.00314	-0.133969	-0.279248	D44	0.881219	0.688802	0.002269	-0.136407	0.730966	0.228582	-0.012316	1	40443	2	321
0	1	0	0.357571	0.669176	-0.0704822	0.01337	0.357571	0.935529	0.151296	3.02275	0.01337	0.041662	5400000000	3327000000	0	58924612	0	5440000000	0	3556000000	3641000000											-0.0173	-3.60892	-3.79575	-0.967775	-0.556265	D44	0.935529	0.669176	0.056996	0.040771	0.789217	0.204112	0.228455	1	37504	2	314
1	1	1	0.6631	0.727446	-0.071035	-0.050439	0.6631	0.873197	0.164586	3.66899	-0.080336	-0.265351	5100000000	3016000000	0	56524171	0	5056000000	0	3454000000	3678000000											-0.070562	8.34124	8.36473	0.07284	-0.443745	D44	0.873197	0.727446	-0.035019	-0.305941	0.4074	0.244066	-0.007991	2	41004	2	302
1	1	1	1.25077	0.880147	-0.0717214	-0.050439	1.25077	0.841032	0.311813	8.34353	-0.172126	-0.860716	4600000000	2741000000	0	53801476	0	4580000000	0	3259000000	4031000000											-0.094249	-64.4751	-62.7072	6.03266	-0.170941	D44	0.841032	0.880147	-0.130712	-1.51086	0.301402	0.293681	-0.001422	2	41810	2	597	0
1	1	1	1.15189	0.536181	-0.0720326	0.133447	1.15189	1.44669	0.758072	2.15601	0.282831	0.983146	4400000000	2652000000		51081104		4364000000		1833000000	2340000000	1574000000	1574000000	1759000000	1443000000	5.56319e+06	105600000	174100000	1489000000	223800000	1265000000	-0.047196	-85.6128	-111.504	-149.555	-0.277802	D44	1.44669	0.536181	0.329725	0.62489	0.105972	0.360723	0.150349	1	32239	2	562	0
1	1	1	1.12132	0.298029	-0.0741639	0.000104	1.12132	1.62952	0.538211	1.42456	0.000104	0.000186	2900000000	1246000000		48470501		2884000000		764800000	859500000	2046000000	2046000000	2042000000	1875000000	3.04621e+06	99021103	53518126	8.96488e+06	8.5878e+06	377077	-0.339138	-0.528346	-0.343733	-0.321125	-0.319502	D44	1.62952	0.298029	0.018689	0.000186	0.055407	0.709399	0.957938	2	31471	2	519	0
0	0	0	1.76652	0.703714	-0.0773364	0.004504	1.76652	1.41407	0.039992	3.37512	0.004504	0.014708	680000000	674800000	0	0	0	680900000	0	477200000	479200000											0.115969	2.36778	1.31403	1.32168	0.961703	K70	1.41407	0.703714	0.006839	0.014411	0.006887	0.247366	0.753631	1	5688	1	73
1	0	0	2.40819	0.785173	-0.077333	-0.050439	2.40819	1.27959	0.067216	4.65492	-0.080574	-0.315375	680000000	674400000	0	0	0	683300000	0	527000000	536500000											0.003491	8.33026	8.10355	9.47573	4.35616	K70	1.27959	0.785173	-0.080488	-0.374411	0	0.312009	0.047922	2	5913	3	75
1	0	0	7.35169	0.792083	-0.0772445	0.011291	7.35169	1.24614	0.178921	4.80962	0.011291	0.053457	740000000	735100000	0	0	0	744800000	0	589900000	589900000											0.089983	1.77845	1.66659	1.48703	1.29015	K70	1.24614	0.792083	0.010717	0.052065	0.001964	0.410097	0.537307	2	9829	3	81	0
1	0	0	2.36864	0.200153	-0.0691092	0.067375	2.36864	3.13526	1.90045	1.25024	0.067375	0.091284	6400000000	3536000000		57906464		6394000000		1128000000	1280000000	1029000000	1029000000	761300000	616700000	20411427	70247079	-7.27922e+06	307400000	66880108	240500000	7.58461	4.87751	3.36246	3.40483	0.486676	L72	3.13526	0.200153	0.036473	0.047024	0.441978	0.160972	0.217598	2	14010	2	290	1
1	0	0	1.88119	0.06498	-0.0700046	0.058917	1.88119	9.29284	5.42217	1.0695	0.058917	0.068192	5800000000	3258000000		64971938		5772000000		350600000	375100000	1510000000	1510000000	1115000000	1000000000	19791160	65718020	-37850495	448400000	90012411	358400000	-0.097237	0.102965	0.126524	0.106347	1.0298	L72	9.29284	0.06498	0.055532	0.066405	0.449946	0.261675	0.200746	2	20387	2	244	0
0	0	0	0.374341	0.499458	-0.0285484	0.044969	0.374341	10.2125	0.425357	1.99784	0.044969	0.103779	35000000000	18820000000		2645000000		34560000000		11830000000	19620000000											-0.158125	-1.17818	-1.02125	-1.21915	-0.675153	C33	1.59126	0.567842	0.054429	0.11284	0.088611	1.36951	0.125491	2	322461	2	47050	0
0	0	0	0.761045	0.576357	-0.0245152	0.030055	0.761045	1.39881	0.29948	2.36048	0.030055	0.070265	37000000000	20540000000		2778000000		37360000000		14680000000	21530000000											0.081039	-5.76759	-11.4042	-5.39156	0.483084	C33	1.39881	0.576357	0.032436	0.068284	0.188645	0.548083	0.262507	2	251313	2	44608	0
0	0	0	0.927973	0.477126	-0.0003605	0.062321	0.927973	2.34405	0.108344	1.91251	0.062321	0.162751	54000000000	33790000000		3219000000	0	54130000000		29970000000	34920000000											0.448956	-0.812622	-0.623193	-0.63832	-0.197668	C33	1.12746	0.645179	0.06504	0.14843	0.157043	0.956359	0.224173		160312		63354	0
0	0	0	0.406319	0.664184	0.0143738	0.061758	0.406319	1.33204	0.214661	2.97782	0.061758	0.17927	64000000000	40730000000		3172000000		64360000000		30570000000	42750000000											0.189007	-0.524732	-0.575803	-0.684003	-0.095476	C33	1.33204	0.664184	0.069026	0.169288	0.126484	0.996323	0.271521	2	210117	2	64530	0
0	0	0	0.48732	0.648892	0.0124017	0.030316	0.48732	1.54194	0.176829	2.84812	0.030316	0.088287	63000000000	38350000000	0	3274000000	0	62990000000	0	24870000000	40880000000											-0.021276	-0.580338	-0.570979	-0.654846	0.022195	C33	1.54194	0.648892	0.038973	0.087282	0.151618	0.86255	0.336024	2	158327	1	58535	0
0	0	0	0.544903	0.662616	0.0262468	0.038857	0.544903	1.2939	0.131415	2.96398	0.038857	0.113036	73000000000	41170000000	0	3700000000	0	72610000000	0	31820000000	48110000000											0.152615	1.56909	0.916369	0.871036	0.323805	C33	1.2939	0.662616	0.042331	0.107548	0.173937	0.797103	0.260537	2	129100	1	57686	0
1	0	0	0.666512	0.689185	0.0480942	0.037834	0.666512	1.0609	0.068937	3.21735	0.037834	0.117189	88000000000	45170000000	0	4356000000	41705000	87780000000	0	42580000000	60490000000											0.208939	0.391458	0.378631	0.282613	0.169048	C33	1.0609	0.689185	0.040479	0.111206	0.163841	0.79829	0.150259	2	112442	1	61390	0
1	0	0	0.585728	0.667536	0.0754382	0.023357	0.585728	0.966358	0.072351	3.00785	0.023357	0.072382	110000000000	43530000000	0	4984000000	22966000	106800000000	0	45050000000	71270000000											0.216311	0.303069	0.51221	0.187632	0.061802	C33	0.966358	0.667536	0.027161	0.064008	0.181765	0.549682	0.291419	2	76542	1	57477	286
1	0	0	0.349451	0.685954	0.101148	0.006353	0.349451	1.17511	0.139613	3.18425	0.006353	0.019697	120000000000	53350000000		4655000000	49990000	124600000000		45400000000	85480000000	51110000000	51110000000	51160000000	41480000000	2157000000	4209000000	719100000	1702000000	967100000	735000000	0.164003	3.16661	2.31269	0.838375	0.409909	C33	1.17511	0.685954	0.011669	0.018781	0.225508	0.410157	0.568178	2	77211	3	51299	137
1	0	0	0.521874	0.668943	0.109773	0.024751	0.521874	1.17518	0.108409	3.02063	0.024751	0.076686	130000000000	59000000000		4711000000	67399000	130600000000		50210000000	87370000000	76300000000	76300000000	73340000000	62290000000	2927000000	5482000000	1446000000	4409000000	1251000000	3158000000	0.048065	1.01039	0.718378	0.436238	0.08562	C33	1.17518	0.668943	0.035257	0.073048	0.214898	0.584207	0.283683	2	71384	3	50689	98
0	0	0	0.693012	0.594995	-0.074921	-0.050439	0.693012	1.30975	0.100697	2.46911	-0.056487	-0.124998	2400000000	1326000000		178800000	0	2358000000		1012000000	1403000000											0.058751	1.13271	1.98579	2.0887	0.065686	S90	1.30975	0.594995	-0.038351	-0.135604	0.029738	0.135215	0.169047	2	103096	3	3342	414
0	0	0	1.19065	0.503204	-0.0742388	0.019353	1.19065	0.728011	0.05269	2.0129	0.019353	0.05095	2800000000	1774000000		156700000	0	2832000000		1391000000	1815000000											0.200884	24.0313	7.51483	7.33819	0.675114	S90	1.27498	0.641099	0.031513	0.049414	0.007894	0.246034	0.248714	2	75638	3	3380	412
0	0	0	1.04061	0.613091	-0.0750286	0.036122	1.04061	1.28103	0.630768	2.58459	0.036122	0.097259	2300000000	1418000000		112600000	0	2283000000		1107000000	1400000000											-0.2078	0.77454	0.952181	0.819168	0.951376	K70	1.28103	0.613091	0.050618	0.104572	0.005477	0.340372	0.28011		78330		2956	0
0	0	0	0.858038	0.477982	-0.0755978	0.067351	0.858038	1.49301	0.409419	1.91564	0.067351	0.150315	1900000000	1315000000		28632390	0	1888000000		881000000	902500000											-0.173107	0.293564	2.05437	1.77353	0.775476	K70	1.49301	0.477982	0.075296	0.142525	0.00564	0.432896	0.380366	2	71983	3	685	0
0	0	0	0.831675	0.593918	-0.0741862	0.081615	0.831675	1.62833	0.116929	2.46256	0.081615	0.180522	2900000000	2383000000	0	14265445	0	2868000000	0	1464000000	1704000000											0.519139	18.0952	33.1489	28.9706	2.08519	K70	1.62834	0.593918	0.070434	0.16664	0.011633	0.300133	0.286915	2	70855	3	934	0
0	0	0	0.494424	0.683762	-0.0726132	0.030126	0.494424	1.97732	0.162306	3.16218	0.030126	0.085108	4000000000	3603000000	0	14053698	0	3961000000	0	1822000000	2708000000											0.380785	-0.230221	0.029928	0.01758	0.282567	K70	1.97732	0.683762	0.031079	0.082129	0.006911	0.205806	0.387146	2	64206	3	1048	6
1	0	0	0.722568	0.702902	-0.0721679	0.012921	0.722568	1.47139	0.163015	3.36589	0.012921	0.042184	4300000000	3959000000	0	13409840	0	4270000000	0	2690000000	3001000000											0.071972	5.49377	8.38423	5.77224	3.84324	K70	1.47138	0.702902	0.022927	0.041917	0.0611	0.242759	0.435435	1	52932	3	1086	0
1	0	0	1.03577	0.804167	-0.0685688	0.011241	1.03577	1.92919	0.775802	5.10639	0.011241	0.047835	6800000000	6359000000	0	16953521	0	6769000000	0	3296000000	5443000000											0.585294	1.80884	0.939283	1.18428	4.0319	K70	1.92919	0.804167	0.017563	0.046806	0.007735	0.246085	0.391043	2	49975	3	1600	0
1	0	0	0.950595	0.365806	-0.0534197	0.014577	0.950595	3.58383	2.30059	1.5768	0.014577	0.028535	17000000000	13130000000	0	29228466	0	17290000000	0	3664000000	6324000000	3774000000	3774000000	3603000000	3147000000	50202378	156500000	138400000	230400000	55016746	175300000	1.55403	-0.128734	-0.438312	-0.536063	0.26653	K70	3.58383	0.365806	0.018151	0.015992	0.28262	0.218273	0.238834	2	37402	3	1735	41
1	0	0	0.65	0.600067	-0.0366915	0.023378	0.65	1.94758	0.941236	2.50042	0.023378	0.047945	29000000000	20620000000		63931168	4.96032e+06	28900000000		10590000000	17340000000	8131000000	8131000000	7570000000	6801000000	113800000	328200000	206500000	575000000	35048648	539900000	0.671887	0.268972	-0.127614	0.105083	0.503719	E48	1.94758	0.600067	0.025826	0.04671	0.312274	0.281316	0.060955	2	28656	3	2881	2
0	0	0	0.25203	0.686198	-0.0703259	0.001243	0.25203	1.6726	0.15583	3.18672	0.001243	0.003721	5500000000	3908000000		2.50838e+06	0	5549000000		2337000000	3808000000											0.040267	-3.33519	-4.01561	-4.26895	5.73288	K70	1.6726	0.686198	0.014969	0.003898	0.081786	0.205312	0.512262	2	20571	2	1339	0
0	0	0	0.825095	0.662065	-0.0689838	0.044449	0.825095	1.38829	0.546204	2.95915	0.044449	0.140234	6500000000	4734000000		8004411	0	6481000000		2498000000	4409000000											0.167949	3.51573	2.51623	2.69208	0.921443	K70	1.89566	0.680323	0.054391	0.129048	0.016481	0.314892	0.239581		20571		1214
0	0	0	0.611891	0.648746	-0.0685385	0.05456	0.611891	1.97797	0.457849	2.84694	0.05456	0.162462	6800000000	5662000000		6.77557e+06	0	6790000000		2862000000	4405000000											0.04771	0.101951	0.014472	-0.001685	1.12923	K70	1.97797	0.648746	0.059354	0.151793	0.013092	0.213161	0.216629		20032		1260
0	0	0	0.460659	0.646232	-0.0680234	0.045789	0.460659	2.13643	0.323196	2.82671	0.045789	0.129882	7100000000	6127000000		6.96505e+06	0	7148000000		2868000000	4619000000											0.052683	2.49217	3.20297	2.94432	1.3561	K70	2.13643	0.646232	0.052106	0.126194	0.006591	0.268173	0.267787		15832		1115
0	0	0	0.640334	0.613915	-0.0674918	0.056174	0.640334	2.29805	0.36572	2.59011	0.056174	0.151686	7500000000	6422000000	0	6.46619e+06	0	7517000000	0	2795000000	4615000000											0.050078	-0.695101	-0.583579	-0.577745	0.265021	K70	2.29805	0.613915	0.066679	0.141926	0.002933	0.358969	0.273892	1	14901	2	1123	0
0	0	0	0.766457	0.616542	-0.0667984	0.052273	0.766457	2.09894	0.409179	2.60785	0.052273	0.135868	8000000000	7055000000	0	6.60883e+06	0	7998000000	0	3361000000	4931000000											0.064052	4.15036	5.11247	5.20966	3.45864	K70	2.09894	0.616542	0.058089	0.132216	0.003893	0.276686	0.307294	1	10031	2	1150	2
1	0	0	0.453308	0.796201	-0.0549918	0.025263	0.453308	1.68804	0.127076	4.90679	0.025263	0.095989	16000000000	15100000000	0	6.23405e+06	0	16200000000	0	8944000000	12900000000											1.025	-0.985406	1.3121	1.39456	2.42998	K70	1.68804	0.796201	0.025207	0.092589	0.0037	0.187252	0.378179	2	21881	2	1217
1	0	0	0.564818	0.771898	-0.0428584	0.019592	0.564818	1.71981	0.190497	4.38401	0.019592	0.089683	25000000000	20420000000	0	8.06499e+06	0	24620000000	0	11870000000	19010000000											0.518678	1.43299	-3.34852	-3.51744	1.3023	K70	1.71981	0.771898	0.025348	0.071196	0.016104	0.205018	0.352018	2	20066	2	1668	0
1	0	0	0.247369	0.842186	-0.0154977	0.016732	0.247369	1.55112	0.177511	6.33659	0.016732	0.095551	44000000000	37750000000		6.54732e+06		43620000000		24340000000	36740000000	8654000000	8654000000	7694000000	5515000000	209800000	354600000	444200000	991200000	382300000	608900000	0.495798	2.83568	3.60723	4.1279	4.92282	K70	1.55112	0.842186	0.024143	0.088453	0.011436	0.198401	0.385708	2	13525	2	2314	2
0	0	0	0.228241	0.633892	-0.0714574	0.005427	0.228241	1.52333	0.223623	2.73143	0.005427	0.013578	4800000000	3960000000		77212956	0	4763000000		2599000000	3019000000											0.194812	-2.00337	-3.09403	-3.58182	1.99328	S90	1.52333	0.633892	0.011414	0.013615	0.03453	0.37724	0.490448	2	14360	2	6794	0
0	0	0	0.521793	0.653372	-0.0690332	0.016679	0.521793	1.01042	0.186756	2.88493	0.016679	0.048931	6400000000	5232000000		76473838		6446000000		3945000000	4369000000											0.230968	-19.6052	69.0624	41.4455	0.919104	S90	1.326	0.677765	0.016229	0.045004	0.098768	0.271737	0.371572	2	19022	2	9400	0
0	0	0	0.345418	0.708806	-0.0668788	0.041077	0.345418	1.18548	0.109856	3.43414	0.041077	0.133132	7900000000	6271000000		74463179		7942000000		4302000000	5580000000											0.232052	2.38977	2.28076	2.25973	1.19843	K70	1.45788	0.70257	0.046004	0.125101	0.063338	0.493474	0.322136	2	19550	2	11019	0
0	0	0	0.189526	0.744702	-0.0623527	0.052639	0.189526	0.9504	0.018507	3.91699	0.052639	0.173825	11000000000	7808000000		18086708		11090000000		5676000000	7685000000											0.395704	17.8215	17.1881	17.7891	4.57733	K70	1.37566	0.693301	0.051412	0.147302	0.080787	0.334314	0.307485		17706		11751	0
0	0	0	0.340274	0.720261	-0.0575412	0.034141	0.340274	1.33022	0.185995	3.57476	0.034141	0.117141	14000000000	9745000000	0	17748264	0	14430000000	0	7326000000	10390000000											0.30139	0.297012	0.359252	0.367628	3.22343	K70	1.33022	0.720261	0.046119	0.107914	0.090776	0.290121	0.357568	2	34923	2	13902	0
0	0	0	0.228493	0.767877	-0.0528003	0.031074	0.228493	1.55606	0.147898	4.30807	0.031074	0.122584	18000000000	12720000000	0	17409820	0	17720000000	0	8174000000	13610000000											0.22819	7.54526	6.45437	4.91744	1.43215	K70	1.55606	0.767877	0.043515	0.121433	0.072366	0.351313	0.326008	2	23138	2	14998	0
1	0	0	0.297116	0.79297	-0.0494155	0.025387	0.297116	1.45333	0.070727	4.83021	0.025387	0.116032	20000000000	14460000000	0	22055634	0	20070000000	0	9948000000	15910000000											0.132652	-11.5033	-20.8773	-14.8616	2.55541	K70	1.45333	0.79297	0.040247	0.115446	0.05849	0.310251	0.298126	1	25192	2	17037	0
1	0	0	0.350664	0.794793	-0.0453648	0.017263	0.350664	1.23739	0.120535	4.87313	0.017263	0.083775	23000000000	13640000000	0	11853354	0	22880000000	0	11020000000	18190000000											0.140153	-10.6915	-18.7868	-11.1715	0.675386	K70	1.23739	0.794793	0.032518	0.078953	0.072898	0.241194	0.387918	2	35956	2	18789	0
1	0	0	0.376242	0.78246	-0.0470179	0.006156	0.376242	1.30202	0.196076	4.59686	0.006156	0.029144	22000000000	12440000000	0	11514910	0	21730000000	0	9556000000	17010000000	6323000000	6323000000	6671000000	5047000000	321300000	340000000	443800000	296200000	158900000	137300000	-0.050165	-5.11919	-10.144	-8.88161	0.601314	K70	1.30202	0.78246	0.026737	0.029044	0.088644	0.290923	0.53646	1	30371	2	21239	0
1	0	0	0.338818	0.759415	-0.0507898	-0.0017	0.338818	1.15486	0.207638	4.15654	-0.0017	-0.007447	19000000000	11100000000		11176466		19110000000		9613000000	14520000000	5893000000	5893000000	6344000000	4642000000	139800000	433800000	374700000	259900000	294600000	-34728089	-0.120608	-0.914438	1.4964	1.5537	0.575907	K70	1.15486	0.759415	0.017789	-0.007552	0.086689	0.308332	1.13363	2	21087	2	19513	0
0	0	0	1.84088	0.262577	-0.0775022	0.070948	1.84088	1.02999	0.596809	1.35607	0.070948	0.102482	570000000	145000000		5914236	0	565800000		140800000	148600000											-0.168635	-0.578395	-1.00266	-1.16775	-0.982565	C17	1.02999	0.262577	0.084939	0.105968	0.016276	0.643618	0.126708	2	20380	3	692	105
0	0	0	3.69581	0.29434	-0.0771612	0.055564	3.69581	0.550227	0.119053	1.41711	0.055564	0.083507	800000000	237300000		49561413	0	802600000		246100000	309300000											0.418479	-1.01833	-1.10492	-1.13759	0.347025	C17	0.964502	0.385411	0.049689	0.077072	0.080359	0.608143	0.116556	2	16576	2	770	85
0	0	0	3.03919	0.186933	-0.075933	0.033124	3.03919	6.83993	2.92639	1.22991	0.033124	0.044268	1700000000	976300000		48642431	0	1655000000		142700000	309500000											1.06267	-0.681102	-0.832592	-0.915127	0.182038	C17	6.83993	0.186933	0.026226	0.030245	0.075491	0.38528	0.150436		12879		890	89
0	0	0	1.58742	0.242557	-0.0757129	0.028245	1.58742	3.46831	2.50722	1.32023	0.028245	0.036026	1800000000	641600000		46568690	0	1808000000		185000000	438600000											0.092306	-0.395033	-0.363675	-0.84685	0.202776	S90	3.46831	0.242557	0.022994	0.035714	0.079913	0.39425	0.198984	2	22078	2	808	70
0	0	0	1.08706	0.307152	-0.0756086	-0.04391	1.08706	1.81793	0.736821	1.44332	-0.04391	-0.060606	1900000000	560500000	0	46162462	0	1881000000	0	308300000	577600000											0.040058	-0.518628	0.010696	0.092611	0.615932	F51	1.81793	0.307152	-0.043271	-0.062155	0.119441	0.449371	0.170701	1	21190	2	1227	73
0	0	0	1.36378	0.194236	-0.0742101	0.019957	1.36378	6.51866	3.899	1.24106	0.019957	0.026229	2900000000	1578000000	0	43878071	0	2852000000	0	242100000	553900000											0.516361	2.59935	3.96785	20.4265	0.201528	F51	6.51866	0.194236	0.006971	0.020551	0.122379	0.396632	0.537117	2	17891	2	1475	100
1	0	0	1.6103	0.221956	-0.0742518	-0.040035	1.6103	3.8002	2.58543	1.28527	-0.040035	-0.050551	2800000000	1614000000	0	41771403	0	2823000000	0	424800000	626500000											-0.010161	3.55301	2.10699	1.42327	0.16147	F51	3.8002	0.221956	-0.051008	-0.051721	0.128926	0.428992	-0.830378	2	21007	2	1465	104
1	0	0	2.29293	0.267673	-0.0740407	0.002934	2.29293	3.29443	1.32635	1.36551	0.002934	0.003888	3000000000	1860000000	0	40626936	0	2969000000	0	564400000	794800000											0.02942	-2.55823	31.9797	-2.17195	-0.119224	C39	3.29443	0.267673	-0.005372	0.003908	0.148985	0.41313	0.803085	1	30984	2	1279	109
1	0	0	1.63356	0.164936	-0.0723842	-0.024621	1.63356	6.10537	1.90044	1.19751	-0.024621	-0.031087	4100000000	2988000000		39698654		4120000000		489400000	679500000	1198000000	1198000000	1296000000	1128000000	10161700	106900000	-1.67814e+06	-77986532	9.28407e+06	-87270605	0.387349	0.560234	0.760108	0.561954	0.113247	C39	6.10537	0.164936	-0.021592	-0.025368	0.183794	0.290855	-0.119047	2	41555	2	1256	0
1	0	0	1.13281	0.160336	-0.0722745	0.017717	1.13281	5.76045	2.33199	1.19095	0.017717	0.021158	4200000000	2868000000		38870673		4196000000		498000000	672700000	1476000000	1476000000	1456000000	1300000000	9.9407e+06	114400000	-31171161	84940496	11278818	73661678	0.018487	0.302872	0.197913	0.116461	0.224184	C39	5.76045	0.160336	0.010127	0.020909	0.130462	0.351677	0.132785	2	38243	2	1335	0
0	0	0	0.668082	0.311838	-0.0497705	0.015133	0.668082	2.34805	0.42436	1.45315	0.015133	0.032364	20000000000	19600000000		772072	4.89191e+06	19820000000		7628000000	11160000000											0.063043	-1.01997	-0.845112	-0.8432	0.460709	K70	2.56932	0.563166	0.010505	0.024126	0.067515	0.071615	0.294053	2	43285	2	1954	0
0	0	0	1.42645	0.505567	-0.0455666	0.018345	1.42645	3.06115	0.577888	2.02252	0.018345	0.044096	23000000000	22470000000		5.74739e+06	0	22740000000		5135000000	13690000000											0.147264	1.14756	0.23709	0.228463	0.569126	K70	4.37666	0.602118	0.017137	0.043147	0.01728	0.104613	0.335769	1	57074	2	2335	9
0	0	0	0.915709	0.487645	-0.0461355	0.0053	0.915709	1.78874	0.148799	1.95177	0.0053	0.01374	22000000000	22140000000		4.59574e+06	0	22350000000		6480000000	14000000000											-0.01737	-1.61044	-1.42764	-1.72046	-0.849662	K70	3.41601	0.626553	0.008647	0.014318	0.033444	0.072726	0.435318		51706		2450	0
0	0	0	0.840017	0.451532	-0.044564	0.010723	0.840017	1.69119	0.006274	1.82326	0.010723	0.029194	23000000000	23230000000		2.94612e+06	2940464	23440000000		7143000000	14970000000											0.048834	-0.537421	-0.658327	-0.671395	-0.596021	K70	3.25165	0.638528	0.012137	0.028975	0.09464	0.08545	0.285407		53269		2857	0
0	0	0	0.795528	0.710283	-0.0337662	0.02862	0.795528	4.17413	0.434301	3.45164	0.02862	0.089255	31000000000	30160000000	0	5.67226e+06	0	30930000000	0	7226000000	21970000000											0.319904	1.64738	1.29113	1.29506	1.84268	K70	4.17413	0.710283	0.034531	0.086813	0.088522	0.143702	0.195041	1	51501	2	3058	0
0	0	0	0.50229	0.763096	-0.019648	0.0329	0.50229	3.20817	0.319365	4.22112	0.0329	0.126687	41000000000	38950000000	0	7.42453e+06	0	40740000000	0	12140000000	31090000000											0.316902	3.51129	3.3299	3.37089	2.31326	K70	3.20817	0.763096	0.031496	0.122167	0.177164	0.145748	0.24776	2	40317		3761	0
1	0	0	0.635807	0.823456	0.0237742	0.029818	0.635807	1.92099	0.437206	5.66431	0.029818	0.150164	71000000000	59520000000	0	33606162	0	70890000000	0	30980000000	58370000000											0.316603	4.08631	4.04408	4.08818	3.45597	K70	1.92099	0.823456	0.028337	0.132981	0.255916	0.08552	0.276046	2	42795	2	6295	0
1	0	0	0.483238	0.87189	0.0921339	0.028111	0.483238	2.07111	0.65095	7.80578	0.028111	0.192205	120000000000	100400000000	0	65702756	0	118400000000	0	48450000000	103200000000											0.659484	1.2469	1.18793	1.14878	1.22001	K70	2.07111	0.87189	0.032519	0.175424	0.125123	0.079822	0.266494	2	45178	2	10179	65
1	0	0	0.287618	0.851677	0.163393	0.021363	0.287618	2.32556	0.592284	6.74205	0.021363	0.152633	170000000000	125900000000		86001357		167800000000		54120000000	142900000000	24670000000	18620000000	21850000000	10890000000	341800000	3723000000	2172000000	4258000000	1201000000	3057000000	0.371544	0.363701	0.195944	-0.307741	-0.239214	K70	2.32556	0.851677	0.031153	0.1228	0.022946	0.110951	0.282001	2	39823	2	9929	22
1	0	0	0.206437	0.85357	0.192108	0.017393	0.206437	1.51194	0.200531	6.82921	0.017393	0.118061	190000000000	135700000000		104600000		187800000000		89730000000	160300000000	16880000000	8385000000	14830000000	5187000000	166800000	4154000000	2288000000	4049000000	956200000	3093000000	0.118801	3.60779	4.06081	3.976	2.80684	K70	1.51194	0.85357	0.028656	0.112475	0.246813	0.044653	0.236176	2	37669	2	10523	52
0	0	0	0.615938	1.62075	-0.076508	0.035004	0.615938	0.364641	0.007952	-1.61096	0.035004	-0.266429	1300000000	704900000		135500000	0	1256000000		1265000000	1391000000											0.110518	2.93435	1.09242	-80.643	-0.235798	C13	0.557207	1.10768	0.060444	-0.308903	0.027559	0.747409	0.091837		37258		1432	0
0	0	0	2.23341	1.69782	-0.0770698	0.051067	2.23341	0.345895	0.000478	-1.43304	0.051067	-0.798975	870000000	341700000		134100000	0	866100000		768800000	866500000											-0.193806	-50.0642	46.4718	57.0244	1.46759	C13	0.444374	1.00044	0.095278	-141.763	0.015608	1.65184	0.319194	2	31268	3	1439
0	0	0	2.64927	1.77044	-0.0771785	-0.030335	2.64927	0.320829	0.000572	-1.29797	-0.030335	2.07466	790000000	221800000		151500000	0	790600000		735100000	814400000											-0.087145	-7.43115	-5.13039	-4.8802	0.028088	C13	0.301773	1.03015	-0.008171	1.05396	0.015051	1.47003	-0.636313		28587		1420
0	0	0	2.50053	0.648379	-0.0765008	0.133447	2.50053	1.05169	0.761792	2.84397	0.479594	2.34509	1300000000	754600000		94120963	0	1261000000		717500000	817700000											0.595151	129.884	86.7106	2.54445	-0.051464	C13	1.05169	0.648379	0.401854	1.1095	0.023076	1.05444	0.218395		17198		1210
0	0	0	2.17679	0.592418	-0.076572	0.024476	2.17679	0.931321	0.456306	2.4535	0.024476	0.064574	1200000000	645000000	0	87325409	0	1212000000	0	692600000	717900000											-0.03917	-1.56032	0.163886	-1.86432	-0.210579	C13	0.931321	0.592418	0.025429	0.061276	0.009279	1.1994	0.388623	1	18789	2	1412	0
0	0	0	3.26285	0.636463	-0.0764008	-0.007818	3.26285	0.805288	0.253491	2.75075	-0.007818	-0.020332	1300000000	633400000	0	127700000	0	1331000000	0	786500000	846900000											0.098067	-9.14899	-6.13419	-10.8753	-0.19215	C13	0.805288	0.636463	-0.000321	-0.020546	0.019169	1.17642	1.89794	1	13983	2	1449	0
1	0	0	2.08298	0.695063	-0.0754613	0.072533	2.08298	0.961715	0.521796	3.27937	0.072533	0.220821	2000000000	1290000000	0	139400000	0	1983000000	0	1342000000	1378000000											0.490298	7.96214	7.24926	8.14581	0.684955	C13	0.961715	0.695063	0.064607	0.198734	0.020574	1.08143	0.272673	1	15422	2	1471	0
1	0	0	7.32892	0.58659	-0.075522	0.106927	7.32892	1.09501	0.814019	2.41891	0.106927	0.298186	1900000000	1181000000	0	127700000	0	1941000000	0	1078000000	1138000000											-0.02125	0.091724	-0.501962	-0.718184	-0.064631	C13	1.09501	0.58659	0.106844	0.261454	0.017379	1.18612	0.190584	2	21205	2	1615	0
1	0	0	2.05819	0.700403	-0.0728321	0.101777	2.05819	1.46989	0.596311	3.33781	0.101777	0.29845	3800000000	2789000000		106800000		3809000000		1898000000	2668000000	2943000000	2943000000	2495000000	1757000000	155200000	198800000	8.005e+06	404600000	111100000	293500000	0.943424	-41.988	-54.2645	-47.8545	2.93396	C13	1.46989	0.700403	0.079175	0.257256	0.12602	0.772654	0.274496	2	10484	2	1562	6
0	0	0	1.47157	0.008366	-0.0774359	-0.002394	1.47157	29.872	0.027848	1.00844	-0.002394	-0.007138	610000000	450600000		22754869	1.14911e+06	611800000		400000000	400000000											-0.074295	-1.89135	-1.67778	-1.70381	-0.285236	C38	1.12653	0.653792	0.030454	-0.007169	0.218183	1.29561	1.27807	2	21780	3	2910	0
0	0	0	2.23428	0.013949	-0.0773742	-0.050439	2.23428	12.455	0.010717	1.01415	-0.062425	-0.204965	650000000	505700000		22380801	624420	654700000		477800000	480800000											0.07003	-1.26976	-1.69256	-1.77444	0.208882	C38	1.05845	0.734349	-0.045993	-0.227301	0.310738	1.39964	-0.546724	2	23223	3	3001	0
0	0	0	4.23366	0.672747	-0.0770925	0.11651	4.23366	1.24165	0.180712	3.05574	0.11651	0.387778	850000000	699600000		8.88515e+06	1802900	850300000		563500000	572100000											0.298868	0.245056	0.435312	-0.432086	0.30242	C38	1.24165	0.672747	0.115266	0.315065	0.314067	1.54767	0.17695		41861		4193	0
0	0	0	2.00623	0.016155	-0.0762731	0.133447	2.00623	15.3552	0.015475	1.01642	0.138379	0.445064	1400000000	1241000000		26623450	0	1419000000		971200000	991900000											0.669116	1.67786	0.991961	0.985235	0.885411	C38	1.27773	0.698867	0.112657	0.36742	0.395846	1.58271	0.1843	1	33639	3	5335	0
0	0	0	2.24732	0.009521	-0.0756365	0.104086	2.24732	37.4799	0.017304	1.00961	0.104086	0.382973	1900000000	1673000000	0	25556253	0	1861000000	0	1385000000	1397000000											0.31141	0.460545	0.526395	0.855974	0.728592	C38	1.20846	0.750595	0.091866	0.367787	0.337708	1.7167	0.204918	2	24613	3	4570	0
0	0	0	2.84934	0.806481	-0.0734622	0.105129	2.84934	1.21585	0.083196	5.16744	0.105129	0.492641	3400000000	3169000000	0	23871115	0	3371000000	0	2606000000	2719000000											0.811183	1.15011	1.26744	1.26715	1.3587	C38	1.21585	0.806481	0.084014	0.421595	0.457376	1.30596	0.189785	1	10692	3	5262	0
1	0	0	1.32217	0.803558	-0.0715835	0.077766	1.32217	1.19666	0.066651	5.09057	0.077766	0.398358	4700000000	4409000000	0	46635576	0	4676000000	0	3685000000	3757000000											0.38697	0.591251	0.805385	0.825799	0.54791	C38	1.19666	0.803558	0.067047	0.34065	0.272151	1.36658	0.215942	2	38295	3	6061	0
1	0	0	3.42498	0.647971	-0.0734168	0.076278	3.42498	1.38322	0.187948	2.84068	0.076278	0.291166	3400000000	3017000000	0	46769357	0	3403000000	0	2181000000	2205000000											-0.272271	-0.057095	-0.031237	-0.0674	0.205368	C38	1.38322	0.647971	0.085279	0.257216	0.173883	2.47877	0.212575	1	25322	3	6309	0
1	0	0	1.67719	0.708479	-0.0709063	0.081814	1.67719	1.24717	0.096883	3.43029	0.081814	0.259228	5100000000	4545000000		62163923		5146000000		3644000000	3646000000	8724000000	8724000000	8306000000	7877000000	75122632	329600000	-16607949	440700000	91060510	349700000	0.512323	1.41073	1.10578	1.05843	0.420699	C38	1.24717	0.708479	0.064728	0.233108	0.296159	1.69545	0.206605	1	22594	3	8691	0
1	0	0	1.06648	0.761753	-0.0673444	0.056996	1.06648	1.11453	0.040807	4.19732	0.056996	0.219447	7600000000	6468000000		59127792		7619000000		5804000000	5804000000	12490000000	12490000000	11990000000	11390000000	98913275	501200000	-17335613	498900000	135200000	363800000	0.48064	0.59465	0.553324	0.615607	0.508158	C38	1.11453	0.761753	0.045469	0.2004	0.291244	1.63878	0.270889	1	31947	3	10586	0
0	1	0	0.350951	0.602524	-0.0710828	-0.014651	0.350951	1.12025	0.272731	2.51587	-0.014651	-0.03326	5000000000	1012000000		163900000	0	5023000000		903600000	3027000000											0.073926	12.1809	9.09704	8.96334	-0.038756	C39	1.12025	0.602524	-0.003274	-0.035592	0.176837	0.273978	0.243263	2	32798	2	6662
0	1	0	0.58966	0.348062	-0.0689905	-0.050439	0.58966	0.809313	0.26274	1.53389	-0.053899	-0.151345	6500000000	1889000000		191200000	0	6476000000		1673000000	4377000000											0.289225	3.51734	4.95279	5.406	-0.13688	C39	1.12887	0.675933	-0.025856	-0.147664	0.114544	0.338237	0.145723	2	47894	3	6063
0	1	0	1.07766	0.687552	-0.0668368	0.019464	1.07766	1.07066	0.338375	3.20054	0.019464	0.061274	8000000000	2332000000		212000000		7972000000		2178000000	5481000000											0.230918	-0.463649	-0.459551	-0.325765	0.321369	C39	1.07066	0.687552	0.03225	0.056453	0.215803	0.433319	0.207187		51234		7474
0	1	0	0.443577	0.6375	-0.0667207	0.032132	0.443577	1.08557	0.274782	2.75862	0.032132	0.095177	8100000000	2375000000		209600000		8052000000		2188000000	5133000000											0.010117	3.84956	3.71312	-362.161	0.016331	C39	1.08557	0.6375	0.047475	0.088196	0.22291	0.573134	0.075669	2	55683	3	8195
0	1	0	0.582098	0.608351	-0.0670793	0.017352	0.582098	0.863854	0.181199	2.55331	0.017352	0.046045	7800000000	2191000000	0	205700000	0	7803000000	0	2537000000	4747000000											-0.061955	-0.848258	-0.795345	-7.43003	-0.04439	C39	0.863854	0.608351	0.039643	0.045012	0.217736	0.555356	0.081231	1	48276	3	7184	14
0	1	0	0.812754	0.588088	-0.0668293	0.03619	0.812754	0.986294	0.33477	2.4277	0.03619	0.090049	8000000000	2814000000	0	202200000	0	7977000000	0	2853000000	4691000000											0.022244	-0.679127	-0.70702	-0.658953	-0.179688	C39	0.986294	0.588088	0.052914	0.086903	0.208839	0.566568	0.106584	1	46640	3	7479	9
1	1	1	1.38181	0.454445	-0.0557174	0.058044	1.38181	1.077	0.16966	1.833	0.058044	0.115969	16000000000	5143000000	0	594000000	0	15690000000	0	4775000000	7131000000											0.329951	0.157302	0.107585	-1.85472	-0.311382	C39	1.077	0.454445	0.05567	0.080238	0.25714	0.594065	0.113475	2	53555	2	13300	9
1	1	1	1.10983	0.387465	-0.0471684	0.029773	1.10983	1.83168	1.19736	1.63256	0.029773	0.050948	22000000000	11220000000	0	957700000	0	21630000000	0	6125000000	8380000000											0.378282	1.93801	1.97955	-2.62486	0.026459	C39	1.83169	0.387465	0.025597	0.041935	0.194625	0.486853	0.086151	2	57702	2	13264	0
1	1	1	0.931317	0.511848	-0.0356132	0.031451	0.931317	1.10405	0.407637	2.04854	0.031451	0.05718	30000000000	11260000000		1019000000		29650000000		10200000000	15180000000	14010000000	14010000000	13610000000	11090000000	398000000	1563000000	227200000	892500000	85282812	807200000	0.367766	-0.823938	-0.993004	0.630463	0.003681	C39	1.10405	0.511848	0.034883	0.055766	0.237666	0.472561	0.095556	2	88113	2	16541	0
0	0	0	0.860324	0.550492	-0.0763072	0.014173	0.860324	1.2657	0.192939	2.22465	0.014173	0.030014	1400000000	736900000		60834578	7.78318e+06	1396000000		582200000	768300000											0.059736	-1.88058	-1.17908	-1.58636	0.135188	C33	1.2657	0.550492	0.033969	0.030642	0.395004	0.562294	-0.178422	2	66792	2	1122
0	0	0	1.9712	0.418248	-0.0761816	0.025665	1.9712	0.905509	0.101401	1.71895	0.025665	0.055059	1500000000	812300000		78469314	1.1859e+06	1483000000		741500000	768400000											0.062514	-0.341969	0.722207	0.69255	0.340393	C33	1.09547	0.518206	0.037058	0.051703	0.365456	0.615707	0.18115	2	66092	2	2175
0	0	0	1.87666	0.450407	-0.0754495	0.027799	1.87666	1.45815	0.542916	1.81953	0.027799	0.053392	2000000000	1259000000		114500000	1.18297e+06	1991000000		863600000	896800000											0.342826	0.037303	0.948502	0.57443	0.486993	C33	1.45815	0.450407	0.034072	0.044124	0.341391	0.583546	0.286292	2	63780	2	2289
0	0	0	1.02454	0.229282	-0.0752015	0.028586	1.02454	1.25296	0.086428	1.29749	0.028586	0.052867	2200000000	1329000000		110600000	914684	2163000000		974300000	1011000000											0.086464	0.853865	1.86898	0.976029	0.416663	C33	1.36388	0.46746	0.036579	0.051543	0.492545	0.623474	0.249873		79593		2923
0	0	0	1.09176	0.502397	-0.0749647	0.002869	1.09176	1.24362	0.211925	2.00964	0.002869	0.005578	2300000000	1409000000	0	102400000	67700	2328000000	0	1133000000	1169000000											0.07603	-0.987087	-0.637539	-1.46296	0.214473	C33	1.24362	0.502397	0.01341	0.005563	0.554324	0.600524	0.670371	2	73145	2	2880	0
0	0	0	1.22017	0.5322	-0.0745733	0.03304	1.22017	1.33411	0.21405	2.13767	0.03304	0.068566	2600000000	1778000000	0	91527651	0	2600000000	0	1333000000	1383000000											0.116743	0.637253	0.608312	0.565994	0.288663	C33	1.33411	0.5322	0.040203	0.066937	0.514288	0.672276	0.191253	2	56745	2	2081	0
1	0	0	1.52979	0.644927	-0.0730422	0.029602	1.52979	1.18314	0.04481	2.81632	0.029602	0.073662	3700000000	2710000000	0	98947331	0	3663000000	0	2291000000	2362000000											0.408978	1.18915	1.42873	1.58528	0.230733	C33	1.18314	0.644927	0.033269	0.07127	0.570205	0.529204	0.15877	1	46209	2	3019	0
1	0	0	1.81122	0.701165	-0.071888	0.016788	1.81122	1.22501	0.090333	3.34633	0.016788	0.051785	4500000000	3360000000	0	95062982	0	4464000000	0	2743000000	3130000000											0.218807	-0.50637	0.717896	-0.554846	0.022251	C33	1.22501	0.701165	0.026632	0.051134	0.551161	0.571322	0.340438	2	47030	2	2327	0
1	0	0	1.23458	0.660779	-0.0685427	0.116608	1.23458	1.67322	0.279548	2.94793	0.116608	0.360795	6800000000	5601000000		60228653		6787000000		3348000000	4485000000	4204000000	4204000000	3433000000	2595000000	59273046	171900000	28255397	860000000	204000000	656000000	0.520346	8.16688	9.84826	10.3063	2.36517	C33	1.67322	0.660779	0.100816	0.284927	0.557327	0.619395	0.237199	2	44032	2	2349	0
1	0	0	0.801468	0.575245	-0.0673353	0.133447	0.801468	1.42835	0.294587	2.3543	0.159729	0.415447	7600000000	4515000000		58869445		7625000000		3161000000	4386000000	2947000000	2947000000	2530000000	1998000000	61063948	152800000	67058846	1425000000	273800000	1151000000	0.123525	4.94521	6.47825	6.61538	0.370091	C33	1.42836	0.575245	0.159743	0.355378	0.651532	0.386532	0.192158	2	58540	2	2150	0
0	0	0	0.894012	0.868018	-0.0766953	-0.046126	0.894012	1.90678	0.125243	7.57678	-0.046126	-0.287221	1100000000	1042000000		0	0	1126000000		546300000	977500000											0.087766	5.86193	5.89538	4.31282	3.32361	F52	1.90678	0.868018	-0.039003	-0.335386	0.047599	0.024023	-0.001859	2	21261	2	284	0
0	0	0	1.12343	0.322272	-0.0762264	-0.010501	1.12343	2.26772	0.003255	1.47552	-0.010501	-0.095408	1500000000	1377000000		0	0	1452000000		1056000000	1317000000											0.28908	3.33376	3.3312	2.72074	1.47777	F52	1.30409	0.906939	0.007336	-0.100187	0.061666	0.015633	0	2	24190	2	281
0	0	0	1.25906	1.09739	-0.0760982	-0.050439	1.25906	0.915848	0.096549	-10.2682	-0.190126	38.0442	1500000000	1455000000		26248835	0	1541000000		1588000000	1691000000											0.064417	0.840219	0.840219	-0.113536	1.31161	K70	0.915848	1.09739	-0.11053	1.89583	0.069651	0.011885	0		17639		290
0	0	0	1.55613	1.2517	-0.0760981	-0.050439	1.55613	2.34546	0.032722	-3.97303	-0.138262	0.792132	1500000000	1433000000		25413329	0	1541000000		610900000	1929000000											4e-05	11.8357	11.8412	11.0701	0.368794	K70	2.34546	1.2517	-0.069811	0.549307	0.02646	0.012632	0.000362		16131		333
0	0	0	1.22541	1.20186	-0.0754274	-0.009076	1.22541	3.10551	0.007466	-4.95389	-0.009076	0.040607	2000000000	1932000000	0	565902	0	2006000000	0	622100000	2412000000											0.302239	0.553212	0.53527	0.613927	-0.151917	K70	3.10551	1.20186	0.0193	0.039743	0.004031	0.040181	-0.033403	1	13349	2	366
0	0	0	0.417414	0.555532	-0.0670791	0.133447	0.417414	0.029666	0.002175	2.24988	0.789691	2.52889	7800000000	67724864	0	608765	0	7803000000	0	2283000000	4335000000											2.88904	-1.04097	-1.03336	-1.02963	2.84768	K70	0.029666	0.555532	0.510132	1.11678	0.064933	0.004523	0.260368	1	15275	2	390
1	0	0	0.35491	0.628363	-0.0669802	-0.050439	0.35491	0.08642	0.009772	2.6908	-0.069256	-0.169789	7900000000	115600000	0	1.48577e+06	0	7872000000	0	1338000000	4946000000											0.008801	1.78023	2.12272	1.96112	-0.23583	K70	0.08642	0.628363	-0.031193	-0.18554	0.309704	0.012568	-0.031	2	22170	2	564
1	0	0	2.07937	0.374701	-0.066802	0.004833	2.07937	0.458183	0.245292	1.59924	0.004833	0.009677	8000000000	196800000	0	1.53687e+06	0	7996000000	0	429500000	2996000000											0.015721	-0.610895	0.04482	-0.475308	4.17758	K70	0.458183	0.374701	0.026289	0.007669	0.1804	0.033554	0.26751	2	15572	2	487	0
1	0	0	1.23088	0.482337	-0.0629931	0.012493	1.23088	3.84356	1.41721	1.93176	0.012493	0.022156	11000000000	2030000000		1.70212e+06		10640000000		528300000	5132000000	325800000	325800000	289400000	97997026	9.60053e+06	62086890	110700000	111400000	-4979105	116400000	0.330776	0.742576	0.522301	28.0162	0.342581	K70	3.84356	0.482337	0.021346	0.021133	0.127455	0.030623	-0.044685	2	19916	2	513	2
0	0	0	0.825508	0.159902	-0.0760425	0.03443	0.825508	1.92258	1.60576	1.19034	0.03443	0.042182	1600000000	479100000		696404	0	1579000000		249200000	252500000											-0.039079	-0.085037	0.02996	-0.256927	0.174749	L71	1.92258	0.159902	0.036412	0.041816	0.116521	0.201352	0.163782	2	51011	3	744	4
0	0	0	3.13671	0.123237	-0.0763592	-0.050439	3.13671	3.15758	2.74169	1.14056	-0.212715	-0.256909	1400000000	542000000		4.75643e+06	0	1359000000		229800000	253000000											-0.139207	2.98514	11.3975	11.6591	0.17962	L71	2.35803	0.186105	-0.239086	-0.282487	0.062586	0.213088	-0.107385		72875		353	4
0	0	0	2.3301	0.116823	-0.0762054	0.044977	2.3301	3.61322	3.23817	1.13228	0.044977	0.055741	1500000000	638900000		631365	0	1466000000		271100000	292700000											0.078546	1.32508	0.960137	1.06083	0.062596	L71	2.35655	0.199613	0.038579	0.054148	0.063771	0.267608	0.194248	2	62187	3	404	0
0	0	0	1.54572	0.211593	-0.0758102	0.032371	1.54572	2.50991	1.30846	1.26838	0.032371	0.041015	1700000000	869200000	0	453282	0	1741000000	0	346300000	368300000											0.040101	-0.955077	-0.967627	-0.841647	0.029828	L72	2.50991	0.211593	0.024706	0.040268	0.023161	0.266449	0.248079	1	63503	3	300	0
0	0	0	1.49595	0.327471	-0.0752424	0.037567	1.49595	1.70198	0.493394	1.48693	0.037567	0.051848	2100000000	1158000000	0	886901	0	2135000000	0	680200000	699100000											0.226486	-0.799041	-0.615646	-0.633461	-0.179468	L72	1.70198	0.327471	0.029186	0.050702	0.341648	0.279801	0.308341	1	64867	3	368	68
1	0	0	1.63665	0.437772	-0.0744867	0.032817	1.63665	1.32814	0.335857	1.77864	0.032817	0.053681	2700000000	1511000000	0	655588	0	2660000000	0	1138000000	1164000000											0.245804	-0.015704	0.087487	0.123175	-0.09165	L72	1.32814	0.437772	0.033027	0.052612	0.272793	0.256172	0.296053	2	55987	3	407	0
1	0	0	2.75841	0.309922	-0.0746471	0.055097	2.75841	1.64309	0.235038	1.44911	0.055097	0.08272	2500000000	1255000000		1.25199e+06		2548000000		763700000	789800000	757900000	672400000	676100000	578500000	17846142	60042027	4.62718e+06	187500000	45306572	142200000	-0.025389	2.67146	2.61798	2.19567	0.220497	L72	1.64309	0.309922	0.05763	0.080881	0.075657	0.263858	0.241588	2	76108	3	733	0
1	0	0	1.15584	0.630906	-0.0682466	0.06457	1.15584	1.48102	0.266844	2.70934	0.06457	0.141965	7000000000	5261000000		31831783		6993000000		3552000000	4412000000	2030000000	1981000000	1687000000	1398000000	43173370	144000000	21598611	428300000	120200000	308000000	0.010012	8.32509	6.79128	7.64328	3.24581	L72	1.48102	0.630906	0.047139	0.119347	0.031259	0.283344	0.280763	2	71481	3	2763	2
0	0	0	0.364531	0.640793	-0.054176	0.029899	0.364531	3.19362	1.61258	2.78391	0.029899	0.06581	17000000000	9085000000		590200000	0	16760000000		2845000000	10740000000											0.866745	-0.920184	-0.835687	-0.793274	-0.136329	C25	3.19362	0.640793	0.030477	0.063913	0.00067	0.218865	0.149761	2	66451	3	7505	0
0	0	0	0.632538	0.736503	-0.0465561	0.010684	0.632538	1.04637	0.121382	3.7951	0.010684	0.032971	22000000000	5586000000		655800000	0	22050000000		5188000000	15500000000											0.31564	-2.3746	-1.33186	-1.3389	0.092867	C25	1.07672	0.702672	0.017358	0.031623	0.001037	0.130839	0.202993	2	62002	3	7929
0	0	0	0.524331	0.771828	-0.0401005	0.016985	0.524331	0.65109	0.192344	4.38266	0.016985	0.062645	27000000000	7512000000		1043000000	0	26540000000		11060000000	19920000000											0.203256	-2.84511	-2.97093	-2.96987	0.725519	C25	0.679193	0.750634	0.044058	0.062361	0.002372	0.901679	0.114642		56576		9780	85
0	0	0	0.319727	0.735552	-0.0372203	0.030578	0.319727	0.667846	0.158972	3.78146	0.030578	0.118896	29000000000	8130000000		1476000000	0	28540000000		12170000000	20990000000											0.075366	3.83978	3.57197	3.60453	0.003738	C25	0.667846	0.735552	0.056648	0.111577	0.005036	1.31611	0.189991	2	66658	3	12603	1179
0	0	0	0.249607	0.774421	-0.0311473	0.00065	0.249607	0.679528	0.227238	4.43304	0.00065	0.002669	33000000000	12020000000	0	1687000000	0	32750000000	0	17680000000	25360000000											0.147773	-2.2012	-2.39226	-2.35167	0.897223	C25	0.679528	0.774421	0.030625	0.002698	0.004588	1.09939	0.90932	1	60063	3	10247
0	0	0	0.210608	0.745773	-0.0373533	-0.005294	0.210608	0.596891	0.197997	3.93349	-0.005294	-0.02216	28000000000	7971000000	0	1666000000	0	28440000000	0	13350000000	21210000000											-0.131567	-2.8401	-2.69418	-2.72966	0.12799	C25	0.596891	0.745773	0.017189	-0.022401	0.000298	1.46104	-0.255085	1	57915	3	10463
1	0	0	0.455364	0.725987	-0.0284912	-0.047146	0.455364	0.62615	0.242122	3.64946	-0.047146	-0.177854	35000000000	12850000000	0	1630000000	0	34600000000	0	20530000000	25120000000											0.21634	1.21964	1.36933	1.2272	0.725537	C25	0.62615	0.725987	-0.014078	-0.156758	0.004173	1.27018	0.025228	2	39039	3	10355
1	0	0	0.428189	0.691936	-0.0352272	0.011238	0.428189	0.52358	0.189606	3.24608	0.011238	0.038778	30000000000	8822000000	0	1684000000	0	29920000000	0	16850000000	20700000000											-0.135192	-2.53788	-1.83989	-2.35041	0.58393	C25	0.52358	0.691936	0.040238	0.039331	0.00378	1.03306	-0.055453	1	60196	2	11779	5581
1	0	0	0.606726	0.646672	-0.0331385	0.060307	0.606726	0.642034	0.216171	2.83023	0.060307	0.18207	31000000000	12180000000		1594000000		31370000000		18970000000	20290000000	29100000000	29100000000	26980000000	20900000000	327700000	1596000000	750000000	2172000000	323800000	1848000000	0.048473	1.35624	1.89261	2.43192	0.122838	C25	0.642034	0.646672	0.082822	0.166738	0.005949	0.927746	0.149065	2	57218	2	10835	5842
1	0	0	0.492205	0.591054	-0.0337181	0.062278	0.492205	0.747474	0.355937	2.44531	0.062278	0.163476	31000000000	13290000000		1524000000		30970000000		17780000000	18300000000	33710000000	33710000000	31330000000	25680000000	305100000	1623000000	589300000	2490000000	548300000	1941000000	-0.012829	0.51853	0.645052	0.719197	0.260029	C25	0.747474	0.591054	0.081711	0.153278	0.011084	1.08866	0.220264	1	77486	2	10233	6707
0	0	0	1.00829	0.489638	-0.0669111	0.051147	1.00829	1.59324	0.483804	1.95939	0.051147	0.104778	7900000000	3539000000		651300000	19116944	7920000000		2267000000	3944000000											-0.011885	-3.38304	-3.21911	-3.20056	-0.210388	C32	1.56084	0.498024	0.083641	0.101983	0.022653	0.939618	0.218013	2	161677	2	9005	5100
0	0	0	2.45246	0.554074	-0.0615436	0.053145	2.45246	0.93355	0.158788	2.24253	0.053145	0.119504	12000000000	5632000000		1238000000	11660421	11650000000		5375000000	6921000000											0.46783	1.33529	0.493632	0.462697	0.127268	C32	1.04784	0.594227	0.045336	0.110016	0.04268	0.648333	0.174697	2	117129	2	10209	5325
0	0	0	2.45042	0.6138	-0.0573327	0.072469	2.45042	0.966528	0.195154	2.58933	0.072469	0.183514	15000000000	6065000000		2881000000	5.19774e+06	14570000000		6275000000	8944000000											0.25104	2.48805	0.289278	0.886584	-0.035805	C32	0.966528	0.6138	0.069877	0.168819	0.038787	0.660268	-0.293069		197127		10081
0	0	0	1.20905	0.525585	-0.0580938	0.07644	1.20905	1.00903	0.182186	2.10786	0.07644	0.177977	14000000000	5080000000		3239000000	17656942	14040000000		5034000000	7380000000											-0.03627	-0.169291	-0.337233	-0.399832	1.21359	C32	1.00903	0.525585	0.093872	0.164156	0.033731	1.32698	0.206711		245730		11066
0	0	0	1.32661	0.495988	-0.0580495	0.037986	1.32661	0.8977	0.19239	1.98408	0.037986	0.077643	14000000000	4478000000	0	3594000000	14283122	14070000000	0	4988000000	6980000000											0.002192	0.086172	-0.164956	-0.675884	0.408548	C32	0.8977	0.495988	0.056995	0.075284	0.020741	1.30742	0.224394	2	220507	2	10831
0	0	0	0.896579	0.561427	-0.0575073	0.029525	0.896579	0.825486	0.183459	2.28012	0.029525	0.062703	14000000000	4605000000	0	3608000000	0	14450000000	0	5579000000	8112000000											0.026752	6.91374	8.01361	3.80318	0.998256	C32	0.825486	0.561427	0.043486	0.066443	0.020002	1.46147	0.117196	2	205197	2	10521
1	0	0	1.37715	0.540798	-0.0578441	0.038425	1.37715	0.790924	0.13561	2.17769	0.038425	0.085616	14000000000	3838000000	0	3467000000	17411202	14220000000	0	4852000000	7688000000											-0.014209	-0.811392	-0.847408	-0.654586	-0.178816	C32	0.790924	0.540798	0.058785	0.084365	0.012574	1.72865	0.101007	2	181630	2	10221
1	0	0	1.95451	0.503239	-0.0554433	0.017324	1.95451	0.923408	0.180184	2.01304	0.017324	0.036166	16000000000	5166000000	0	3367000000	1.07967e+06	15880000000	0	5595000000	7993000000											0.117268	-3.66133	-3.36015	-1.01667	0.146009	C32	0.923408	0.503239	0.032866	0.033045	0.021123	1.06643	0.208467	2	167918	2	7848	6685
1	0	0	1.45387	0.515829	-0.0538789	0.020815	1.45387	0.964341	0.192	2.06539	0.020815	0.042458	17000000000	5781000000		3339000000		16970000000		5995000000	8753000000	15080000000	15060000000	14620000000	13380000000	268800000	527100000	216700000	435000000	93117306	341900000	0.068393	0.314345	0.388456	0.103922	-0.233071	C32	0.964341	0.515829	0.032917	0.041615	0.035086	0.887443	0.214049	2	139725	2	10120	6770
1	0	0	1.40879	0.448532	-0.051143	0.061028	1.40879	1.2812	0.37289	1.81334	0.061028	0.117451	19000000000	7367000000		3152000000		18870000000		5750000000	8463000000	19010000000	18970000000	17750000000	16270000000	273700000	741800000	193400000	1490000000	396900000	1094000000	0.111953	-0.324089	-0.103451	-0.120353	-0.15031	C32	1.2812	0.448532	0.068203	0.105093	0.025798	1.00518	0.266291	2	150067	2	9685	6984
0	0	0	1.16787	0.446161	-0.0694535	0.021936	1.16787	1.00182	0.712793	1.80558	0.021936	0.043842	6200000000	2194000000		931900000	0	6155000000		2190000000	2746000000											0.160543	-1.71365	-1.76383	-3.9571	0.174655	F51	1.00182	0.446161	0.030621	0.036867	0.048601	0.207974	0.086936	2	17712	2	4332	0
0	0	0	1.52145	0.353385	-0.0682201	0.023772	1.52145	1.47345	0.885782	1.54651	0.023772	0.045512	7000000000	2921000000		930000000	0	7011000000		2775000000	3543000000											0.139147	-2.38445	-1.89966	-1.66779	-1.40602	F51	1.05273	0.50535	0.02804	0.045122	0.033164	0.177714	0.246413	2	75169	2	5370
0	0	0	1.48511	0.467122	-0.0651933	0.034658	1.48511	0.863607	0.460504	1.8766	0.034658	0.077123	9100000000	4084000000		1162000000	0	9113000000		4621000000	5335000000											0.29978	-3.27014	-3.65184	-5.19047	0.079427	F51	0.883662	0.585435	0.036164	0.073961	0.028403	0.150429	0.169381		58523		5964
0	0	0	0.904944	0.517585	-0.0646803	0.028139	0.904944	0.600121	0.213397	2.0729	0.028139	0.066196	9500000000	2978000000		1569000000	0	9469000000		4565000000	5348000000											0.039086	-0.828478	-0.698723	-1.32608	-0.162725	F51	0.652318	0.564772	0.037149	0.063438	0.033958	0.189639	0.238686	2	47352	2	7029
0	0	0	0.742692	0.593047	-0.0630274	0.010453	0.742692	0.497923	0.28875	2.45728	0.010453	0.02487	11000000000	2597000000	0	1678000000	446513	10620000000	0	5215000000	6296000000											0.119048	-3.86163	-3.21956	-79.2087	0.16929	L72	0.497923	0.593047	0.025722	0.024297	0.041227	0.158428	0.290828	2	78358	2	5336
0	0	0	1.16894	0.499835	-0.0607135	0.018903	1.16894	0.683772	0.311588	1.99934	0.018903	0.041377	12000000000	3200000000	0	2046000000	598184	12220000000	0	4680000000	6110000000											0.151343	1.04223	0.625709	1.47564	-0.084236	L72	0.683772	0.499835	0.029085	0.035309	0.02085	0.177417	0.258932	2	53616	2	4363
1	0	0	1.61028	0.554065	-0.0584355	0.010404	1.61028	0.45323	0.182863	2.24248	0.010404	0.02207	14000000000	2552000000	0	2891000000	924919	13810000000	0	5631000000	7649000000											0.129405	-0.848047	-0.451568	2.53176	0.091098	L72	0.45323	0.554065	0.019388	0.021994	0.044274	0.119394	0.414646	2	48942	2	4880
1	0	0	1.86091	0.622803	-0.0550852	0.002957	1.86091	0.427123	0.163745	2.65113	0.002957	0.007233	16000000000	3036000000	0	2957000000	0	16130000000	0	7107000000	10050000000											0.168511	-5.98982	-1.8441	-13.5953	0.105475	L72	0.427123	0.622803	0.015178	0.007275	0.04108	0.107656	0.670271	2	65127	2	5368	0
1	0	0	1.21695	0.637762	-0.0534756	0.005589	1.21695	0.453847	0.190268	2.76062	0.005589	0.015126	17000000000	2810000000		2094000000		17250000000		6192000000	11000000000	2020000000	2020000000	2225000000	1315000000	175800000	400600000	241400000	260800000	167500000	93274236	0.069287	-1.79844	-1.41676	-1.55177	0.214403	L72	0.453847	0.637762	0.019401	0.014928	0.039024	0.117112	0.642347	2	49450	2	5244	0
1	0	0	0.689829	0.659883	-0.0511796	0.00339	0.689829	0.513526	0.258389	2.94017	0.00339	0.009666	19000000000	3623000000		2200000000		18840000000		7054000000	12430000000	2446000000	2446000000	2432000000	1523000000	179500000	386500000	255700000	196500000	135300000	61172542	0.092424	-59.4988	2.763	7.29775		L72	0.513526	0.659883	0.016817	0.009545	0.023703	0.129821	0.688626	2	51793	2	5036	0
0	0	0	0.624041	0.091165	-0.0753654	0.013205	0.624041	4.98417	3.86394	1.10031	0.013205	0.020043	2000000000	1145000000		7360462	0	2050000000		681700000	682200000											-0.264057	-0.049917	-0.162763	-0.301825	-0.206426	L71	1.67942	0.332836	0.009344	0.023343	0.128967	0.875667	0.291326	2	41623	3	11955	0
0	0	0	2.46731	0.113265	-0.0743579	0.084634	2.46731	4.43432	2.77307	1.12773	0.084634	0.132669	2700000000	846400000		115900000	0	2749000000		510700000	1055000000											-0.244867	6.49848	6.80249	6.78017	1.02606	L71	1.65741	0.383852	0.090133	0.119883	0.001248	0.799137	0.145025	2	36038	3	13984
0	0	0	1.47989	0.531336	-0.0728067	0.053835	1.47989	2.8953	1.04955	2.13372	0.053835	0.101512	3800000000	1904000000		141300000	0	3826000000		657600000	2033000000											0.391816	-0.594055	-0.415202	-0.424556	0.151324	L71	2.8953	0.531336	0.054461	0.0987	0.008003	0.11677	0.111708		36284		1026
0	0	0	0.829434	0.302934	-0.0716005	0.011673	0.829434	2.18007	0.687635	1.43458	0.011673	0.027815	4700000000	2440000000		145700000	0	4664000000		1170000000	2894000000											0.218897	0.017619	-0.045151	-0.110066	0.170711	L71	2.08585	0.620521	0.021861	0.027999	0.01371	0.14652	0.440617		31232		1559
0	0	0	0.804671	0.679874	-0.0711192	0.05856	0.804671	1.38517	0.417077	3.12377	0.05856	0.167901	5000000000	2837000000	0	129300000	0	4998000000	0	2048000000	3398000000											0.071648	2.99589	3.33917	3.48044	2.05753	L72	1.38517	0.679874	0.069804	0.176812	0.01083	0.311921	0.286014	2	30781	3	1791	0
0	0	0	1.62171	0.588971	-0.0712985	0.082264	1.62171	1.27475	0.250289	2.43292	0.082264	0.225378	4900000000	2822000000	0	128900000	0	4873000000	0	2214000000	2870000000											-0.024904	6.70974	6.3678	6.60381	1.88922	L72	1.27475	0.588971	0.10068	0.202697	0.006819	0.425945	0.20119	1	36748	3	1744	0
1	0	0	2.50056	0.411927	-0.07249	0.105712	2.50056	1.35283	0.641006	1.70047	0.105712	0.215149	4000000000	1394000000	0	198400000	0	4046000000	0	1030000000	1667000000											-0.169763	-0.379854	-0.20132	-0.218618	-0.286599	L72	1.35283	0.411927	0.124902	0.198138	0.007716	0.659466	0.255895	1	27463	3	1712	0
1	0	0	4.27025	0.404929	-0.0694135	0.073072	4.27025	1.62406	0.688932	1.68047	0.073072	0.12337	6200000000	2996000000	0	200300000	0	6182000000	0	1845000000	2503000000											0.527965	1.7961	1.53878	1.62094	2.78822	L72	1.62406	0.404929	0.064787	0.101581	0.342024	0.328944	0.237323	2	46962	2	1709	0
1	0	0	2.96023	0.410328	-0.0683474	0.06712	2.96023	1.57673	0.379268	1.69586	0.06712	0.113336	6900000000	3726000000	0	178900000	0	6923000000	0	2363000000	2841000000	5545000000	5545000000	5066000000	4482000000	292500000	192800000	25786558	565100000	125200000	439800000	0.119741	0.23	0.111455	0.126706	0.098887	L72	1.57673	0.410328	0.067256	0.10774	0.195175	0.800936	0.221656	2	40096	2	1640	0
1	0	0	1.97814	0.477586	-0.0659814	0.058976	1.97814	1.38953	0.33296	1.91419	0.058976	0.106748	8600000000	4711000000		189100000		8565000000		3391000000	4091000000	8298000000	8298000000	7722000000	6953000000	308100000	260400000	61285028	594200000	137500000	456700000	0.237316	-0.274444	-0.395197	-0.399343	0.17002	F51	1.38953	0.477586	0.060475	0.102065	0.207181	0.968756	0.231386	1	38016	2	1832	0
0	1	0	0.718331	0.701499	-0.0050623	0.042469	0.718331	1.43081	0.380339	3.35007	0.042469	0.136217	51000000000	42680000000		589100000	476000000	50870000000		29830000000	35680000000											0.296622	2.09079	2.22012	21.6962	0.317758	C39	1.43081	0.701499	0.063307	0.125921	0.225146	0.870788	0.154962	2	36324	2	61350	20
0	1	0	1.20236	0.822872	0.0201065	0.045226	1.20236	1.17455	0.217114	5.64565	0.045226	0.16272	68000000000	55590000000		613800000	778400000	68340000000		41100000000	50390000000											0.343578	2.05091	1.5053	2.06971	0.151512	C39	1.35281	0.737368	0.050926	0.150186	0.254166	0.881921	0.189212	2	32761	2	70345	56
0	1	0	0.930001	0.703371	0.0428754	0.045595	0.930001	1.36649	0.310824	3.37122	0.045595	0.162033	84000000000	65530000000		891300000	1467000000	84150000000		47950000000	59190000000											0.231336	2.98209	2.3492	5.46679	0.578002	C39	1.36649	0.703371	0.055554	0.139271	0.249971	0.83496	0.202679	2	99640	2	85232	71
0	1	0	0.551754	0.750505	0.0734292	0.023671	0.551754	1.33918	0.327546	4.0081	0.023671	0.087534	110000000000	84480000000		1195000000	1926000000	105400000000		63080000000	79080000000											0.252111	2.08197	2.43289	-1.57783	0.335183	C39	1.33918	0.750505	0.043651	0.085325	0.276779	0.818601	0.148775		115812		89786	76
0	1	0	0.312163	0.789302	0.0764218	-0.024478	0.312163	1.13695	0.311826	4.74613	-0.024478	-0.106469	110000000000	82620000000	0	1087000000	2447000000	107400000000	0	72670000000	84810000000											0.019723	-0.423049	-0.670936	-0.420099	0.298165	C39	1.13695	0.789302	-0.002545	-0.115052	0.262032	0.783827	-0.313343	2	136777	2	78402	33
0	1	0	0.44893	0.864621	0.0658122	0.013816	0.44893	1.00812	0.152458	7.38665	0.013816	0.061976	100000000000	76410000000	0	1237000000	2932000000	100100000000	0	60470000000	76450000000											-0.068563	2.40109	2.00454	-1.02239	0.204428	C39	1.26362	0.763931	0.038908	0.060681	0.284357	0.75174	0.215668	2	168300	2	69093	54
1	1	1	0.584498	0.752458	0.0746475	0.026445	0.584498	1.26145	0.264333	4.03971	0.026445	0.109288	110000000000	82230000000	0	1365000000	3484000000	106200000000	0	65180000000	79920000000											0.061298	0.23761	-0.210684	-0.869907	0.074262	C39	1.26145	0.752458	0.045462	0.103746	0.308734	0.767047	0.229068	2	167184	2	75609	62
1	1	1	0.639646	0.641433	0.095789	0.032938	0.639646	1.51591	0.423424	2.78888	0.032938	0.107416	120000000000	95290000000	0	4224000000	789800000	120900000000	0	62860000000	77550000000											0.138208	-0.205352	-0.379821	-1.34508	0.39951	C39	1.51591	0.641433	0.042774	0.086284	0.252043	0.828713	0.130884	2	200808	3	84622	75
1	1	1	0.471226	0.711347	0.125668	-0.010725	0.471226	1.24205	0.330727	3.46437	-0.010725	-0.033428	140000000000	112900000000		4354000000	1366000000	141600000000		90860000000	100800000000	101200000000	101200000000	101700000000	70100000000	12460000000	15250000000	207800000	-767800000	640100000	-1408000000	0.134655	-4.91684	-4.35084	-0.533442	0.246253	C39	1.24205	0.711347	-0.008473	-0.034435	0.256815	0.714717	-0.833757	2	172424	3	81468	82
1	1	1	1.05893	0.684777	0.129011	0.037719	1.05893	1.20243	0.334511	3.17236	0.037719	0.124879	140000000000	108200000000		4742000000	1902000000	144000000000		90010000000	98580000000	108800000000	108800000000	107600000000	75010000000	12100000000	16020000000	1043000000	6719000000	1333000000	5386000000	0.016389	-0.376139	-0.286931	-0.263208	0.428301	C39	1.20243	0.684777	0.044663	0.118694	0.22373	0.75586	0.198333	2	266964	3	74773	84
0	0	0	0.442184	0.767668	-0.0751375	0.017841	0.442184	0.947476	0.189802	4.30418	0.017841	0.072193	2200000000	1439000000		21294663	0	2208000000		1334000000	1759000000											0.635279	0.917694	1.63426	1.67653	3.26987	E48	1.07795	0.796744	0.010228	0.070581	0.240101	0.500514	0.309031	2	13634	2	598	0
0	0	0	1.95675	0.77056	-0.0749492	0.020502	1.95675	1.28096	0.518293	4.35843	0.020502	0.094599	2300000000	2141000000		397167	0	2339000000		1672000000	1802000000											0.059207	-56.2378	46.7816	31.7815	1.30475	E48	1.28096	0.77056	0.033168	0.086859	0.18648	0.801408	0.202319	1	6497	2	229	2
0	0	0	1.59429	0.706491	-0.0755042	0.02317	1.59429	1.24046	0.643236	3.40705	0.02317	0.089599	2000000000	1678000000		166462	0	1953000000		1353000000	1380000000											-0.164779	0.711799	0.736693	0.691147	3.81039	E48	1.24046	0.706491	0.057429	0.086729	0.125832	0.936509	0.131163	1	15713	2	225	3
0	0	0	0.869302	0.73967	-0.0749613	0.039827	0.869302	1.09291	0.490278	3.84128	0.039827	0.140164	2300000000	2197000000		33805.9	0	2330000000		1663000000	1686000000											0.193005	-2.93673	-2.88961	-2.87621	0.886885	E48	1.32125	0.723701	0.057305	0.132485	0.27922	1.1297	0.109878	1	13232	3	249	4
0	0	0	0.489413	0.756321	-0.0737236	0.051874	0.489413	1.18542	0.425746	4.10376	0.051874	0.201491	3200000000	2769000000	0	398484	0	3190000000	0	2336000000	2412000000											0.368838	-61.0275	-77.8097	-82.201	50.818	E48	1.18542	0.756321	0.035648	0.184197	0.452096	0.520557	-0.091251	1	14085	3	260	4
0	0	0	0.711049	0.757927	-0.0725816	0.054648	0.711049	1.24169	0.611873	4.13098	0.054648	0.225084	4000000000	3663000000	0	712991	0	3983000000	0	2950000000	3018000000											0.248604	8.73133	11.7913	11.993	9.77843	E48	1.24169	0.757927	0.03665	0.203274	0.237348	0.74281	0.26343	2	12651	3	289	6
1	0	0	0.934159	0.75983	-0.0712344	0.050407	0.934159	1.17257	0.529708	4.16372	0.050407	0.209138	4900000000	4311000000	0	301700000	0	4918000000	0	3677000000	3737000000											0.234892	-0.615272	-0.545333	-0.546429	1.20678	E48	1.17257	0.75983	0.040366	0.189919	0.200752	0.614907	0.140688	2	21453	2	287	9
1	0	0	1.1444	0.698646	-0.0608218	0.056307	1.1444	1.22969	0.421547	3.31836	0.056307	0.181399	12000000000	10060000000		1319000000		12150000000		8179000000	8487000000	8762000000	8762000000	8147000000	7722000000	311000000	182600000	-165900000	641800000	113500000	528300000	0.372547	6.61962	6.47293	6.45899	3.95854	E48	1.22969	0.698646	0.029837	0.144314	0.276104	0.721254	0.176792	2	16620	2	2030	34
1	0	0	0.814391	0.640241	-0.0618063	0.046006	0.814391	1.45587	0.654083	2.77964	0.046006	0.139535	11000000000	9241000000		1421000000		11460000000		6347000000	7340000000	9730000000	9730000000	9077000000	8388000000	360900000	174900000	110600000	672400000	129200000	543200000	-0.05627	0.214806	0.237418	0.267037	0.729102	E48	1.45587	0.640241	0.057029	0.131694	0.220711	0.848703	0.192174	2	30762	2	2001	38
0	1	0	0.713873	0.539303	-0.0746431	0.004047	0.713873	0.766974	0.275302	2.17062	0.004047	0.008073	2600000000	1042000000		18076370	0	2551000000		1359000000	1376000000											-0.212413	-0.350483	-0.349803	0.068723	0.055581	C39	0.766974	0.539303	0.024836	0.010061	0.06307	1.54844	-0.05897	2	69259	3	4079	4
0	1	0	0.322752	0.700102	-0.0387914	0.04316	0.322752	1.20093	0.12088	3.33447	0.04316	0.137638	27000000000	22530000000		531700000	0	27450000000		18760000000	19210000000											7.60906	3.2673	4.12774	1.28638	15.4402	C39	1.20093	0.700102	0.027851	0.078646	0.537719	0.826117	0.118295		34115		4421	16
0	1	0	0.387935	0.289494	-0.0309003	0.027651	0.387935	1.0321	0.269285	1.40745	0.027651	0.087357	33000000000	27460000000		562600000	0	32920000000		21680000000	22210000000											0.199644	2.04457	1.76987	1.57842	0.093596	C39	1.26644	0.674447	0.02488	0.076727	0.161356	2.5344	0.26433		123054		4941	5
0	1	0	0.200555	0.68834	-0.0310796	0.014437	0.200555	1.2407	0.112926	3.20863	0.014437	0.044968	33000000000	26800000000		750300000	0	32800000000		21600000000	22580000000											-0.017381	4.669	5.11419	-5.41593	-0.016921	C39	1.2407	0.68834	0.016665	0.04641	0.179682	2.33132	0.283375	2	116245	2	33593	205
0	1	0	0.112823	0.738523	-0.0218866	0.002652	0.15067	1.19246	0.137782	3.82443	0.002652	0.009327	39000000000	30360000000	0	2252000000	0	39180000000	0	25460000000	28940000000											0.194612	-2.15953	-1.19332	0.92407	0.107096	C39	1.19246	0.738523	0.014347	0.009316	0.164228	2.03533	0.676331	2	108131	2	42371	5
0	1	0	0.127887	0.77851	-0.0218262	-0.019459	0.15067	1.10452	0.105474	4.51488	-0.019459	-0.080583	39000000000	29790000000	0	1732000000	0	39230000000	0	26970000000	30540000000											0.001069	-0.844949	-1.41439	-0.218517	0.045263	C39	1.10452	0.77851	0.003182	-0.087807	0.168133	1.9849	-0.758213	2	102138	2	40558	10
1	1	1	0.187025	0.791154	-0.0199163	-0.008519	0.187025	1.08259	0.1146	4.78821	-0.008519	-0.03961	41000000000	31400000000	0	970100000	0	40550000000	0	29010000000	32080000000											0.03381	-0.940383	-0.819214	-3.28913	0.139072	C39	1.08259	0.791154	0.029063	-0.040122	0.159665	1.90387	-3.34768	1	78435	3	39510	11
1	1	1	0.402965	0.767378	-0.0194711	0.005345	0.402965	1.28674	0.163936	4.29881	0.005345	0.023575	41000000000	38760000000		106200000		40860000000		30120000000	31360000000	69130000000	69130000000	68820000000	62350000000	2612000000	2927000000	391700000	597000000	382400000	214600000	0.035604	-0.515348	0.060884	-0.371525	0.1336	C39	1.28673	0.767378	0.014838	0.022581	0.009508	1.69179	0.640471	1	96378	2	36288	15
1	1	1	1.41184	0.502777	-0.0564244	0.024832	1.41184	1.47596	0.548314	2.01117	0.024832	0.081586	15000000000	7924000000		402800000	93421876	15200000000		5369000000	7643000000	9507000000	9507000000	9172000000	7447000000	394600000	1106000000	46827313	781600000	85500863	696100000	-0.707063	12.6042	10.3416	27.7025	0.414324	C39	1.47596	0.502777	0.048871	0.092092	0.228433	0.625385	0.109394	2	158299	2	13829	2201
0	0	0	0.659007	0.397693	-0.0737709	0.006287	0.659007	1.29601	0.272109	1.66028	0.006287	0.010964	3200000000	849400000		54134293	0	3157000000		655400000	1255000000											-0.082095	0.107476	-0.089524	-6.19658	-0.335871	C39	1.29601	0.397693	0.034778	0.010904	0.094468	0.727159	-0.031739	2	85962	2	798	38
0	0	0	10.2521	0.748636	-0.0773069	-0.050439	10.2521	0.361112	0.142255	3.97829	-0.998602	-1.85441	700000000	108000000		43734826	0	701400000		299100000	525100000											-0.777789	0.698627	0.698627	0.628459	-0.592396	C39	0.361112	0.748636	-2.68469	-10.9255	0.030814	0.762706	-0.001065		59817		212	30
0	0	0	12.3	0.387955	-0.0776871	0.062151	12.3	0.220123	0.206016	1.63387	0.062151	0.159406	440000000	35980714		42720110	0	437400000		163500000	169700000											-0.376432	-8.07189	-8.07189	0.668737	-0.893846	C39	0.220123	0.387955	0.102303	0.132197	0	0.156574	0		36740		133	26
0	0	0	9.71858	0.453366	-0.0777032	0.007731	9.71858	0.683021	0.18476	1.82938	0.007731	0.01377	430000000	131700000	0	40690678	0	426300000	0	192800000	193300000											0.085238	-2.58376	-2.58376	0.055528	31.1438	C39	0.683021	0.453366	0.018647	0.013588	0.667841	0.246222	0	1	35779	2	30	11
0	0	0	8.35137	0.669023	-0.0774651	-0.050439	8.35137	0.85321	0.019347	3.02136	-0.073098	-0.173509	590000000	337300000	0	39675962	0	591600000	0	395300000	395800000											0.387888	0.013169	0.013169	0.03921	-0.366987	C39	0.85321	0.669023	-0.034896	-0.189992	0.44749	1.22001	0	2	30921	2	36	6
1	0	0	18.6267	0.723252	-0.0777111	-0.050439	12.9916	0.522418	0.155645	3.6134	-0.208206	-0.675033	420000000	158700000	0	42507235	0	420700000	0	303800000	304300000											-0.288817	2.81931	2.86307	2.86879	2.49583	C39	0.522418	0.723252	-0.192581	-0.905098	0.982817	0.159708	0.006521	1	26833	2	256	2
1	0	0	16.8293	0.125987	-0.0772256	0.013802	12.9916	4.20367	2.28317	1.14415	0.013802	0.020887	760000000	395600000	0	42849031	0	757900000	0	94113724	95482910											0.80132	-1248.32	-17.3088	-5.06803	8.10051	C39	4.20367	0.125987	-6.2e-05	0.012279	0.657962	0.225127	0.146729	2	28011	2	372	2
1	0	0	6.37539	0.390353	-0.0764251	0.008422	6.37539	1.50616	1.05806	1.6403	0.008422	0.011923	1300000000	766900000		40771027		1314000000		509200000	512800000	297600000	297600000	270800000	171400000	12669949	87092603	-8.79612e+06	23328329	14605042	8.72329e+06	0.733424	-6.39749	-7.23844	-7.02266	3.77665	C39	1.50616	0.390353	-5.5e-05	0.010892	0.417276	0.226504	0.626065	1	37914	2	418	1
1	0	0	1.81321	0.610299	-0.0742793	0.015857	1.81321	0.691	0.394933	2.56607	0.015857	0.03448	2800000000	1118000000		38587389		2804000000		1618000000	1711000000	412900000	412900000	363400000	236100000	10789525	77625939	28497874	40115551	7.47147e+06	32644084	1.13416	3.36894	2.94739	2.5671	2.37203	C39	0.691	0.610299	0.021808	0.029877	0.596599	0.14728	0.186249	1	33387	2	555	1
0	0	0	1.53729	0.504461	-0.0582313	0.088518	1.53729	0.450749	0.12758	2.01801	0.088518	0.185325	14000000000	3139000000		526400000	0	13950000000		6965000000	7036000000											0.118576	5.7649	6.00458	5.97098	0.983323	L72	0.450749	0.504461	0.09425	0.169162	0.01002	0.250283	0.087762	2	49310	2	4315	0
0	0	0	1.73543	0.627589	-0.0340398	0.08343	1.73543	0.894519	0.180543	2.6852	0.08343	0.203073	31000000000	14610000000		1405000000	0	30740000000		16330000000	19300000000											0.047649	3.65338	4.11601	4.08538	6.24525	L72	0.894519	0.627589	0.064914	0.162826	0.016325	0.356384	0.216957		110688		16865	499
0	0	0	0.777858	0.41889	-0.0084145	0.083966	0.777858	1.73496	0.273909	1.72084	0.083966	0.254475	49000000000	28840000000		2858000000	0	48540000000		19920000000	33830000000											0.578746	3.89629	4.67811	4.52044	4.02383	L72	1.44724	0.696934	0.073834	0.226273	0.010927	0.356784	0.234033		106863		19337	502
0	0	0	0.636331	0.711698	0.0120697	0.059053	0.636331	1.62312	0.24682	3.46859	0.059053	0.200355	63000000000	40160000000		3857000000	0	62760000000		24740000000	44670000000											0.293039	2.74692	2.65691	2.68596	1.7165	L72	1.62312	0.711698	0.057236	0.181619	0.014885	0.27603	0.239868		124124		20974	614
0	0	0	0.74709	0.699528	0.0268117	0.059763	0.74709	1.43996	0.282442	3.3281	0.059763	0.202691	73000000000	46300000000	0	4669000000	0	73000000000	0	32160000000	51060000000											0.163099	2.89863	2.69819	2.66337	2.26597	N78	1.43996	0.699528	0.060773	0.184951	0.01691	0.305274	0.240378	2	87391	1	21425	813
0	0	0	0.438547	0.685297	0.048242	0.061614	0.438547	1.33669	0.213057	3.1776	0.061614	0.199886	88000000000	58580000000	0	4692000000	0	87880000000	0	43830000000	60220000000											0.203848	0.381745	0.436755	0.208747	0.650045	N78	1.33669	0.685297	0.062098	0.179209	0.013793	0.3204	0.282615	2	111605	1	21454	957
1	0	0	0.632288	0.660105	0.0583182	0.061184	0.632288	1.59182	0.342098	2.94208	0.061184	0.186662	95000000000	65230000000	0	4619000000	0	94880000000	0	40980000000	62630000000											0.079617	1.46344	1.52124	1.18859	1.05874	N78	1.59182	0.660105	0.066023	0.173372	0.017066	0.323774	0.283861	2	92621	3	24575	893
1	0	0	0.561441	0.634098	0.0876838	0.049903	0.561441	1.88236	0.344714	2.73298	0.049903	0.140905	120000000000	81930000000	0	4491000000	0	115300000000	0	43520000000	73090000000											0.214922	0.889608	1.04404	0.797907	1.03425	N78	1.88236	0.634098	0.052388	0.12432	0.015045	0.279669	0.284824	2	142496	3	24290	970
1	0	0	0.389692	0.671215	0.132442	0.055892	0.389692	1.47911	0.214026	3.0415	0.055892	0.16194	150000000000	106200000000		4358000000		146300000000		71790000000	98230000000	35480000000	35480000000	27530000000	16580000000	1249000000	1987000000	928500000	9457000000	2146000000	7311000000	0.269626	1.919	2.22328	1.7546	1.16499	N78	1.47911	0.671215	0.056302	0.151944	0.010875	0.242449	0.226964	2	117611	2	24427	1537
1	0	0	0.320358	0.698911	0.234863	0.051227	0.320358	1.62132	0.267609	3.32127	0.051227	0.164069	220000000000	166700000000		6199000000		217500000000		102800000000	152000000000	42340000000	42340000000	34950000000	21060000000	1445000000	2230000000	1598000000	12820000000	3502000000	9318000000	0.485965	0.48455	0.783792	0.612941	3.11732	N78	1.62132	0.698911	0.050199	0.142319	0.011437	0.194705	0.273169	2	100829	2	25130	1549
0	0	0	0.878356	0.445874	-0.0766938	0.033481	0.878356	1.68586	0.724548	1.80464	0.033481	0.052492	1100000000	797600000		48312444	0	1127000000		322400000	435100000											0.159054	0.079827	0.110316	-1.01983	0.159314	C39	2.47384	0.386032	0.024957	0.050818	0.350663	0.623704	0.0307	2	26567	2	993	39
0	0	0	1.99545	0.427117	-0.0765488	0.034441	1.99545	1.58048	0.515777	1.74556	0.034441	0.056844	1200000000	806600000		114000000	0	1228000000		380600000	493000000											0.089332	-0.233654	-0.201644	-0.291112	0.118961	C39	2.11956	0.401516	0.031739	0.055188	0.293992	0.709496	0.048721	2	24658	2	1136	38
0	0	0	1.74304	0.492462	-0.0760181	0.044335	1.74304	1.42856	0.439364	1.9703	0.044335	0.077972	1600000000	1053000000		128600000	0	1596000000		515600000	725400000											0.300179	2.28134	2.72445	-0.77973	0.128592	C39	2.04248	0.454388	0.038238	0.071877	0.273398	0.666344	0.067558		27241		1371	41
0	0	0	0.96548	0.517703	-0.0756955	0.024539	0.96548	1.3822	0.492125	2.07341	0.024539	0.046862	1800000000	1128000000		125100000	0	1820000000		666800000	902200000											0.140313	-0.114096	-0.003323	-0.627694	-0.05583	C39	1.69172	0.495641	0.024057	0.04566	0.285011	0.684962	0.06659		23557		1598	42
0	0	0	0.83096	0.509238	-0.0754487	0.028659	0.83096	1.5235	0.292536	2.03765	0.028659	0.057634	2000000000	1295000000	0	106200000	0	1992000000	0	850100000	1014000000											0.094121	-0.40519	-0.233929	-0.305896	-0.012217	C38	1.5235	0.509238	0.033739	0.055885	0.275605	0.80841	0.114293	2	23590	2	1776	42
0	0	0	1.22424	0.482769	-0.0750717	0.030341	1.22424	1.51163	0.220608	1.93337	0.030341	0.060104	2300000000	1401000000	0	85013716	0	2253000000	0	926800000	1088000000											0.131445	-0.368539	-0.284545	-0.422461	0.170322	C38	1.51163	0.482769	0.033044	0.055254	0.367265	0.69757	0.104935	2	26151	2	1945
1	0	0	2.48739	0.552956	-0.0724924	0.034158	2.48739	1.3015	0.200068	2.23692	0.034158	0.074032	4000000000	2680000000	0	139500000	0	4044000000	0	2059000000	2236000000											0.550705	1.15657	0.863242	0.766036	0.321172	C38	1.3015	0.552956	0.031266	0.062841	0.425523	0.605718	0.107295	2	21218	2	3380	44
1	0	0	1.56517	0.594942	-0.071022	0.050289	1.56517	1.26384	0.188061	2.46879	0.050289	0.118692	5100000000	3578000000		127400000		5065000000		2831000000	3014000000	4612000000	4612000000	4369000000	3814000000	138100000	316600000	48213553	264000000	34967265	229100000	0.252455	0.495827	0.395326	0.394065	0.211501	C38	1.26384	0.594942	0.054739	0.111641	0.308608	0.910557	0.132435	2	23915	2	4442	44
1	0	0	0.962058	0.610373	-0.0695507	0.053362	0.962058	1.28621	0.224116	2.56656	0.053362	0.134537	6100000000	4535000000		122200000		6087000000		3526000000	3715000000	5473000000	5473000000	5159000000	4562000000	131400000	348400000	66802006	339300000	41706975	297600000	0.201678	0.265451	0.125207	0.28451	0.357078	C38	1.28621	0.610373	0.059859	0.125464	0.37693	0.899128	0.122931	2	37315	2	4916	0
0	0	0	0.730614	0.387069	-0.074317	0.005709	0.730614	1.47724	0.028489	1.63151	0.005709	0.019995	2800000000	1793000000		142700000	7.44469e+06	2778000000		1792000000	1997000000											-0.104871	3.10923	4.36999	10.2328	-0.11736	C27	1.00032	0.718892	0.031425	0.021568	0.202772	0.796317	0.264534	2	129328	3	2784
0	0	0	3.50301	0.437974	-0.0737593	0.000206	3.50301	1.01521	0.039725	1.77928	0.000206	0.00083	3200000000	1915000000		155400000	18428363	3165000000		2345000000	2472000000											0.089636	-6.22628	-3.51692	-5.5509	-0.093392	C27	0.816558	0.781156	0.021	0.000883	0.258402	0.856321	1.16914	2	213532	3	3076
0	0	0	1.87677	0.553886	-0.0723436	0.015118	1.87677	0.920549	0.064055	2.24158	0.015118	0.069303	4100000000	2958000000		160900000	26800204	4148000000		3181000000	3245000000											0.31062	0.847688	1.69679	0.848015	-0.139747	C27	0.929988	0.782385	0.033894	0.06124	0.244572	0.964141	0.486838	2	201395	3	3484
0	0	0	0.869056	0.627063	-0.0713534	0.01378	0.869056	0.898868	0.126269	2.68142	0.01378	0.066065	4800000000	3867000000		176400000	33378185	4835000000		3856000000	3864000000											0.165759	-1.67518	-0.983712	-1.46288	-0.030272	C27	1.00286	0.799178	0.035919	0.063738	0.327117	1.09714	0.381036	1	187022	3	4177
0	0	0	0.647668	0.819737	-0.0698727	0.018896	0.647668	0.984753	0.152698	5.54743	0.018896	0.099685	5900000000	4728000000	0	201200000	43280467	5864000000	0	4801000000	4807000000											0.212642	-0.393058	-1.468	-2.03476	0.007283	F52	0.984753	0.819737	0.042604	0.095633	0.337111	1.09457	0.065654	1	171640	3	4511	0
0	0	0	0.688898	0.764565	-0.0667681	0.033036	0.688898	1.08324	0.164955	4.24746	0.033036	0.155732	8000000000	6626000000	0	258000000	51160138	8019000000	0	6117000000	6131000000											0.367651	5.11818	4.58831	-1.24893	-0.032444	F52	1.08323	0.764565	0.048892	0.121458	0.403017	0.996782	0.341692	2	166433	3	4798	0
1	0	0	0.74222	0.814926	-0.0644459	0.009476	0.74222	1.01985	0.100433	5.40325	0.009476	0.045567	9600000000	7934000000	0	258700000	56080367	9632000000	0	7780000000	7849000000											0.201074	-2.05266	-0.794203	-0.533775	0.026776	F52	1.01985	0.814926	0.028302	0.046914	0.422115	1.01772	0.466366	2	149327	3	4982	62
1	0	0	1.41278	0.832078	-0.0599374	0.046306	1.41278	1.07093	0.141118	5.95515	0.046306	0.264155	13000000000	11170000000	0	271100000	61542301	12760000000	0	10430000000	10620000000											0.325026	-0.592186	-0.452049	-0.462376	0.025153	F52	1.07093	0.832078	0.057702	0.241938	0.483305	0.871142	0.176001	2	97559	3	4502	80
1	0	0	1.00134	0.647212	-0.054322	0.033908	1.00134	1.34804	0.159117	2.83456	0.033908	0.124385	17000000000	14310000000		313800000	52488023	16660000000		10620000000	10780000000	13610000000	13610000000	12970000000	11580000000	705000000	457900000	161400000	653800000	155000000	498800000	0.305526	0.501894	0.489153	0.483534	-0.097512	F52	1.34804	0.647212	0.039628	0.084867	0.529773	0.81661	0.237029	2	163005	3	5616	101
1	0	0	0.505924	0.790469	-0.0338676	0.034542	0.505924	1.10358	0.080259	4.77257	0.034542	0.132982	31000000000	25000000000		340900000	58427542	30860000000		22660000000	24400000000	24940000000	24940000000	23680000000	21340000000	1248000000	664000000	317700000	1153000000	331900000	820800000	0.852441	0.187225	0.357388	0.609995	0.26696	F52	1.10358	0.790469	0.036889	0.126925	0.561829	0.808039	0.287942	2	138832	3	9262	42
0	0	0	1.29625	0.012403	-0.0717329	0.133447	1.29625	32.857	1.28395	1.01256	0.144995	0.154818	4600000000	1699000000		812000000	0	4572000000		153200000	368800000											0.111121	-0.202688	-0.218168	-0.221134	-0.063442	G58	11.0874	0.080665	0.128545	0.150249	0.038258	0.094012	0.077829	2	110390	3	644
0	0	0	2.12742	0.079491	-0.0713134	0.10956	2.12742	16.3334	0.669977	1.08635	0.10956	0.119095	4900000000	1839000000		788000000	0	4863000000		112600000	386600000											0.063725	0.014452	0.008885	0.00712	0.088143	G58	16.3334	0.079491	0.100388	0.115456	0.034182	0.082544	0.077323		110390		676
0	0	0	1.53395	0.078657	-0.0711519	0.094941	1.53395	18.8455	1.62754	1.08537	0.094941	0.103092	5000000000	1998000000		764600000	0	4975000000		106000000	391300000											0.023058	-0.247768	-0.25022	-0.254915	0.039648	G58	18.8455	0.078657	0.089036	0.101885	0.043555	0.083802	0.091247		99696		684
0	0	0	1.38799	0.077074	-0.0705198	0.090314	1.38799	8.6843	0.781245	1.08351	0.090314	0.097937	5400000000	1197000000		709200000	0	5414000000		137800000	417300000											0.088218	0.04377	0.040613	0.048972	0.058801	G58	8.6843	0.077074	0.079943	0.09389	0.071039	0.066632	0.137165	2	81986	3	544
0	0	0	1.4862	0.074929	-0.0706948	0.082953	1.4862	6.70864	1.47461	1.081	0.082953	0.089778	5300000000	897400000	0	744600000	0	5293000000	0	133800000	396600000											-0.02245	0.405582	0.340448	0.344888	0.021974	G54	6.70864	0.074929	0.082645	0.090702	0.065221	0.059793	0.066376	2	80346	3	529	26
0	0	0	2.10312	0.085955	-0.0702708	0.07808	2.10312	6.0306	1.39398	1.09404	0.07808	0.084924	5600000000	909800000	0	717700000	0	5587000000	0	150900000	480200000											0.055634	-0.071754	-0.013904	-0.014533	0.020488	G54	6.0306	0.085955	0.073849	0.083171	0.081719	0.055073	0.088809	1	87490	3	531	28
1	0	0	2.81117	0.188218	-0.0684866	0.076284	2.81117	12.4091	5.35336	1.23186	0.076284	0.088929	6800000000	1383000000	0	687500000	0	6826000000	0	111400000	1285000000											0.221738	-0.227543	-0.246348	-0.239103	-0.03393	G54	12.4091	0.188218	0.067059	0.085444	0.087715	0.044075	0.106477	1	101749	3	537	34
1	0	0	2.12491	0.229364	-0.0669703	0.071088	2.12491	3.22688	1.45453	1.29763	0.071088	0.090015	7900000000	1634000000	0	187400000	0	7879000000	0	506400000	1807000000											0.154246	-0.732332	-0.785715	-0.445452	0.033058	G54	3.22688	0.229364	0.064953	0.086082	0.122162	0.031593	0.144286	2	61651	3	546	39
1	0	0	1.67708	0.215342	-0.0664255	0.047694	1.67708	4.55099	1.50468	1.27444	0.047694	0.061318	8300000000	1435000000		245500000		8257000000		315400000	1778000000	283700000	283700000	189000000	141600000	1.40989e+06	64465929	-27480371	425600000	40804202	384800000	0.048014	-0.258353	-0.178804	-0.191814	0.018605	G54	4.55099	0.215342	0.043273	0.05939	0.096149	0.034363	0.095876	2	56043	3	604	66
1	0	0	1.60248	0.238875	-0.0649294	0.049319	1.60248	2.91157	2.03104	1.31385	0.049319	0.063869	9300000000	1239000000		232000000		9296000000		425700000	2221000000	343800000	343800000	271600000	187800000	996440	94403038	-20969464	470300000	37441240	432900000	0.125816	-0.122327	-0.126595	-0.095994	0.00051	G54	2.91157	0.238875	0.044308	0.061177	0.080386	0.036981	0.079612	1	73890	3	714	73
0	0	0	1.64952	0.235738	-0.0704958	0.053869	1.64952	1.55713	0.214436	1.30845	0.053869	0.061206	5400000000	1584000000		216100000	0	5431000000		462800000	756800000											0.097683	-0.286727	-0.000374	0.275454	0.074587	G58	3.42335	0.139359	0.039052	0.054238	0.176458	0.279108	0.36467	2	122871	2	3998	62
0	0	0	2.19206	0.103256	-0.0699775	0.103893	2.19206	3.63813	0.202173	1.11514	0.103893	0.118159	5800000000	1803000000		213800000	0	5791000000		495600000	597900000											0.066271	-0.28772	-0.318942	-0.28775	-0.002376	G58	3.63813	0.103256	0.096252	0.112256	0.158646	0.287132	0.194567	1	137014	2	3926	70
0	0	0	1.43007	0.143836	-0.0689041	0.117361	1.43007	1.10375	0.406656	1.168	0.117361	0.130949	6500000000	1142000000		289300000	0	6536000000		673100000	681100000											0.128706	0.02079	-0.091918	-0.332235	0.057203	G58	1.69667	0.104214	0.106768	0.123545	0.129732	0.290613	0.192427		128091		4153	82
0	0	0	0.765437	0.280005	-0.0651194	0.085006	0.765437	2.00574	1.0379	1.3889	0.085006	0.104954	9200000000	2094000000		293500000	0	9164000000		704400000	2303000000											0.402075	-0.258702	-0.26743	-0.261078	0.641567	G58	2.97255	0.251293	0.072037	0.097258	0.102145	0.254619	0.220281		115925		4222	114
0	0	0	0.625567	0.293495	-0.0633358	0.059951	0.625567	2.00651	0.902826	1.41542	0.059951	0.082547	10000000000	1574000000	0	286700000	0	10400000000	0	784500000	3053000000											0.135144	-0.194322	-0.305511	-0.306995	1.11244	G56	2.00651	0.293495	0.055927	0.079805	0.117773	0.23776	0.237901	2	110820	3	4592	127
0	0	0	0.61759	0.341296	-0.0612349	0.045728	0.61759	0.792981	0.270487	1.51813	0.045728	0.067145	12000000000	1353000000	0	281500000	0	11860000000	0	1706000000	4048000000											0.140234	-0.803916	-0.771229	-0.772528	0.075149	G56	0.792981	0.341296	0.043398	0.065153	0.132499	0.214684	0.264087	2	99046	2	4896
1	0	0	0.772778	0.376038	-0.0600306	0.022493	0.772778	0.867282	0.158087	1.60266	0.022493	0.035104	13000000000	2443000000	0	247700000	0	12700000000	0	2817000000	4775000000											0.067829	0.151038	-0.338278	-0.400067	0.080301	G56	0.867282	0.376038	0.031458	0.034861	0.132235	0.234164	0.21573	2	95088	2	5042
1	0	0	1.39977	0.142207	-0.0611	0.043236	1.39977	1.27623	0.24149	1.16578	0.043236	0.058636	12000000000	2158000000	0	243000000	0	11960000000	0	1691000000	1700000000											-0.058479	0.539022	0.723693	0.740211	-0.009281	G56	1.27623	0.142207	0.047091	0.051969	0.10591	0.246972	0.279341	2	82193	3	5069	127
1	0	0	1.31461	0.141008	-0.0603441	0.04706	1.31461	1.67465	0.198738	1.16416	0.04706	0.054823	12000000000	2936000000		237500000		12480000000		1753000000	1760000000	3036000000	3036000000	2329000000	2208000000	17166967	84433719	-33975165	755100000	180100000	575000000	0.043903	0.109681	0.051607	0.071802	0.063498	G56	1.67465	0.141008	0.043348	0.053634	0.102386	0.243296	0.238569	1	68241	2	5226	0
1	0	0	1.36021	0.144605	-0.0594267	0.052743	1.36021	2.00968	0.225578	1.16905	0.052743	0.061533	13000000000	3802000000		234200000		13120000000		1892000000	1897000000	3321000000	3321000000	2518000000	2362000000	23412070	91391517	-48320136	888400000	213400000	675000000	0.051042	-0.142224	-0.172797	-0.116765	0.033381	G56	2.00968	0.144605	0.047779	0.060162	0.115686	0.253171	0.240214	1	59897	2	5444	0
0	0	0	0.23997	0.613565	-0.0705524	-0.018887	0.23997	1.45396	0.228853	2.58776	-0.018887	-0.043779	5400000000	4166000000		63876152		5392000000		2865000000	3308000000											-0.198242	3.50851	3.272	2.67818	1.49036	E47	1.45396	0.613565	-0.012164	-0.055094	0.095735	0.528065	0.023802	2	33390	3	1113	195
0	0	0	0.92649	0.510828	-0.0698349	0.010232	0.92649	1.20013	0.188514	2.04427	0.010232	0.024455	5900000000	3855000000		34367346	0	5890000000		2624000000	3253000000											0.092413	-0.679592	-1.11899	-1.33504	0.179157	E47	1.46873	0.552343	0.017399	0.02189	0.107186	0.452729	0.301108	2	30823	3	408	0
0	0	0	0.533479	0.539683	-0.0636847	0.013803	0.533479	1.23554	0.211328	2.17242	0.013803	0.030292	10000000000	5301000000		53124452	0	10160000000		4290000000	5483000000											0.725067	-1.18094	-1.14395	-1.1306	-0.211561	E47	1.23554	0.539683	0.014355	0.023685	0.096298	0.349051	0.315768		33667		1062	402
0	0	0	0.417048	0.565199	-0.0675155	0.023014	0.417048	1.16782	0.215038	2.2999	0.023014	0.052466	7500000000	4840000000		148600000	0	7500000000		3994000000	4430000000											-0.261805	-0.83251	-0.777346	-0.805229	-0.263484	E47	1.21169	0.590704	0.04061	0.066199	0.071128	0.472946	0.276865	2	45098	3	1199	435
0	0	0	0.444432	0.624482	-0.065963	0.031115	0.444432	1.3346	0.252546	2.66299	0.031115	0.079523	8600000000	6025000000	0	121700000	0	8578000000	0	4514000000	5357000000											0.14127	-0.250484	-0.60171	-0.610949	0.288371	E48	1.3346	0.624482	0.032008	0.077653	0.088339	0.359114	0.175431	2	46015	3	2232	0
0	0	0	0.379206	0.655718	-0.0642157	0.041201	0.379206	1.3801	0.353825	2.90459	0.041201	0.114807	9800000000	7191000000	0	115500000	0	9792000000	0	5210000000	6420000000											0.141432	4.95682	3.91386	3.83292	0.734174	E48	1.3801	0.655718	0.040488	0.112257	0.063022	0.461002	0.19368	2	41164	3	2255	0
1	0	0	0.691459	0.664769	-0.062436	0.040492	0.691459	1.34885	0.341111	2.98301	0.040492	0.119275	11000000000	8444000000	0	111100000	0	11030000000	0	6260000000	7331000000											0.126208	1.82208	2.38116	2.38772	1.58826	E48	1.34885	0.664769	0.044044	0.114022	0.073761	0.48051	0.252693	2	26056	3	2496	0
1	0	0	0.879655	0.625577	-0.054477	0.028453	0.879655	1.55053	0.481871	2.67078	0.028453	0.079311	17000000000	13580000000	0	106400000	0	16550000000	0	8755000000	10360000000											0.501168	2.60667	1.50338	1.38359	1.35472	E48	1.55053	0.625577	0.030914	0.063307	0.076336	0.381651	0.247049	2	34290	2	2722	0
1	0	0	0.599804	0.671569	-0.0505356	0.024893	0.599804	1.709	0.391756	3.04478	0.024893	0.07119	19000000000	15620000000		120900000		19290000000		9139000000	12950000000	6209000000	6209000000	5692000000	4832000000	55171899	164100000	168300000	644700000	198600000	446100000	0.165328	4.11066	3.1665	2.75049	1.28981	E48	1.709	0.671569	0.031852	0.070418	0.102719	0.321867	0.30803	2	47569	2	4240	0
1	0	0	0.466247	0.74455	-0.0411716	0.026539	0.466247	1.74064	0.193832	3.91466	0.026539	0.092574	26000000000	21880000000		122200000		25790000000		12570000000	19200000000	6750000000	6750000000	6009000000	4989000000	79671991	223700000	191500000	838700000	240400000	598200000	0.337057	-0.715889	-0.663513	-0.57129	0.542101	E48	1.74064	0.74455	0.030617	0.090795	0.208706	0.261686	0.286687	1	37999	2	5978	0
0	0	0	1.16225	0.076335	-0.0758963	0.075275	1.16225	5.74279	4.75625	1.08264	0.075275	0.082949	1700000000	730500000		43654032	0	1681000000		84817829	84817829											-0.053816	4.15578	4.19628	5.00371	-0.247354	F51	8.61272	0.05046	0.072946	0.081264	0.007528	1.0721	0.01957	2	59195	2	679	0
0	0	0	2.23653	0.054955	-0.0756719	0.063874	2.23653	2.40504	1.19606	1.05815	0.063874	0.069258	1800000000	656800000		172200000	0	1837000000		156900000	188600000											0.091531	-0.910861	-0.676172	-0.630766	0.533816	F51	4.18767	0.102706	0.053518	0.068165	0.00991	0.504617	0.168085	2	58913	2	728	0
0	0	0	1.85972	0.037951	-0.0756184	0.047008	1.85972	2.88484	1.78011	1.03945	0.047008	0.051708	1900000000	745400000		167000000	0	1874000000		117700000	148600000											0.019192	0.168678	0.286499	0.201827	0.1049	F51	6.33158	0.079303	0.043751	0.050551	0.00745	0.73663	0.138291		61738		691	0
0	0	0	1.10918	0.088711	-0.0754515	0.048745	1.10918	5.23319	4.06826	1.09735	0.048745	0.053224	2000000000	771600000		144200000	0	1990000000		147500000	176500000											0.061879	-5.13895	-5.28882	-5.29158	0.157938	F51	5.23319	0.088711	0.04288	0.051932	0.00199	0.734546	0.085849		54777		371	0
0	0	0	1.01881	0.09312	-0.075451	0.010562	1.01881	5.21712	4.20221	1.10268	0.010562	0.011618	2000000000	820200000	0	139500000	0	1990000000	0	157200000	185300000											-0.001424	-0.899686	-0.896559	-0.67612	-0.399442	F51	5.21712	0.09312	0.004571	0.011646	0.003364	0.484986	0.233496	1	51915	2	371	0
0	0	0	1.36616	0.085742	-0.0753671	0.033838	1.36616	5.96683	5.52804	1.09378	0.033838	0.03716	2000000000	886500000	0	134700000	0	2048000000	0	148600000	175600000											0.029278	-6.78565	-10.3841	-11.1045	-0.11292	F51	5.96683	0.085742	0.025233	0.036486	0.002025	0.423892	0.10726	1	53673	2	371	0
1	0	0	2.05688	0.070359	-0.0753891	0.021367	2.05688	8.45855	8.01421	1.07568	0.021367	0.023177	2000000000	985100000	0	130000000	0	2033000000	0	116500000	143000000											-0.007471	-6.19782	-4.01929	-4.00356	0.105231	F51	8.45855	0.070359	0.012184	0.023071	0.002581	0.495746	0.210809	1	41969	3	385	0
1	0	0	4.08196	0.089219	-0.0751242	0.070287	4.08196	7.56098	6.81219	1.09796	0.070287	0.076415	2200000000	1295000000	0	125300000	0	2217000000	0	171300000	197800000											0.0905	-3.61059	-2.96438	-2.96168	-0.195812	F51	7.56098	0.089219	0.056711	0.07397	0.002322	0.450074	0.301378	1	69824	3	384	0
1	0	0	3.21597	0.051592	-0.0748177	0.127754	3.21597	13.4903	11.7904	1.0544	0.127754	0.137303	2400000000	1341000000		120600000		2430000000		99407486	125400000	905100000	905100000	814800000	735000000	53906205	47156829	-25392193	323800000	26966505	296800000	0.095993	6.75434	5.1087	5.13252	0.008252	F51	13.4903	0.051592	0.111709	0.128805	0.00386	0.372487	0.083282	1	42931	3	390	0
1	0	0	2.73393	0.0593	-0.0746401	0.062204	2.73393	11.5089	10.2478	1.06304	0.062204	0.065862	2600000000	1474000000		116000000		2553000000		128100000	151400000	1243000000	1243000000	1151000000	1071000000	56027634	47379483	-29231550	182400000	27399780	155000000	0.050739	0.255178	0.270514	0.358003	0.082901	F51	11.5089	0.0593	0.049253	0.064528	0.005509	0.486915	0.150233	1	34218	2	398	0
0	0	0	0.751627	0.378659	-0.0749909	0.041107	0.751627	2.8538	1.04118	1.60942	0.041107	0.067461	2300000000	708900000		15416275		2310000000		248400000	874600000											0.007957	0.634523	0.694525	0.43983	0.205818	G56	2.8538	0.378659	0.035762	0.065897	0.184736	0.29398	0.169556	1	66260	2	603	37
0	0	0	1.5957	0.380453	-0.0747108	0.04708	1.5957	2.45443	0.8077	1.61408	0.04708	0.076622	2500000000	755900000		15040948	0	2504000000		305800000	981400000											0.08421	0.002339	-0.007888	0.021027	0.044233	G56	2.47229	0.391922	0.053589	0.074417	0.243707	0.322472	0.175037	1	70958	3	803
0	0	0	2.29817	0.343116	-0.074693	0.049815	2.29817	3.61881	1.00082	1.52234	0.049815	0.079576	2500000000	737000000		14665621	0	2516000000		219100000	896300000											0.004914	-0.099635	-0.191158	-0.192607	0.231202	G56	3.36331	0.356164	0.044447	0.077183	0.173812	0.349358	0.230728		72740		839	50
0	0	0	1.37355	0.3603	-0.0744129	0.054202	1.37355	2.66309	0.79364	1.56323	0.054202	0.084468	2700000000	819900000		14290294	0	2711000000		307900000	976700000											0.077302	-0.065672	-0.072196	-0.058105	0.356914	G56	2.66309	0.3603	0.04435	0.081691	0.243219	0.363954	0.24575	2	67579	2	894	53
0	0	0	1.11708	0.435512	-0.0732318	0.046483	1.11708	3.54005	2.0431	1.77152	0.046483	0.077841	3500000000	1494000000	0	14978301	0	3531000000	0	422000000	1538000000											0.302513	-0.396748	-0.378085	-0.377949	0.036897	G56	3.54005	0.435512	0.044009	0.072783	0.210345	0.309089	0.25354	1	65654	3	967
0	0	0	1.25272	0.360138	-0.0727869	0.052789	1.25272	1.81922	0.399089	1.56284	0.052789	0.087435	3800000000	1003000000	0	15956810	0	3840000000	0	551300000	1383000000											0.0875	0.048381	0.048468	-0.666523	0.02809	G56	1.81922	0.360138	0.051946	0.079182	0.211348	0.309166	0.275623	2	68900	3	1030	78
1	0	0	1.87082	0.388661	-0.071902	0.04961	1.87082	2.22015	0.597677	1.63575	0.04961	0.079434	4500000000	1224000000	0	15023028	0	4454000000	0	551300000	1731000000											0.148676	-0.575942	-0.57099	-0.405286	0.101562	G56	2.22015	0.388661	0.05229	0.075553	0.2176	0.300623	0.257451	2	62459	3	1095	89
1	0	0	1.80535	0.432835	-0.0711714	0.036846	1.80535	1.87195	0.484961	1.76316	0.036846	0.062656	5000000000	1426000000	0	15599283	0	4962000000	0	761900000	2148000000											0.113891	-0.568258	-0.574901	-0.575742	0.085178	G56	1.87195	0.432835	0.05835	0.061643	0.311807	0.259868	0.253667	1	74578	3	1045	96
1	0	0	1.4504	0.412218	-0.0712701	0.018204	1.4504	1.61162	0.391147	1.70131	0.018204	0.031527	4900000000	1421000000		98733678		4893000000		881600000	2017000000	1172000000	1172000000	1172000000	947500000		101000000	118900000	114900000	25238660	89698178	-0.013819	-0.689805	-0.769125	13.9164	0.154684	G56	1.61162	0.412218	0.042621	0.031187	0.377466	0.239501	0.219587	1	64761	3	1071	109
1	0	0	0.972485	0.455037	-0.0702213	0.01818	0.972485	2.05301	0.627653	1.83499	0.01818	0.032184	5600000000	1802000000		95114131		5621000000		877700000	2558000000	1270000000	1270000000	1209000000	1018000000	1.3773e+06	126700000	57033650	131600000	36037894	95578989	0.148826	-0.878148	-0.805022	-0.764192	0.1323	G56	2.05301	0.455037	0.027148	0.0312	0.336282	0.225879	0.273809	1	63772	3	1095	118
0	0	0	0.292169	0.732179	-0.044916	0.020091	0.292169	1.09528	0.208825	3.73384	0.020091	0.074272	23000000000	18250000000		675700000	34156000	23190000000		16670000000	16980000000											0.1226	-0.275486	-0.400385	-0.831781	-0.09661	C39	1.09528	0.732179	0.030383	0.070921	0.083672	1.65629	0.331762	2	384317	3	40150	230
0	0	0	0.498321	0.721231	-0.0347748	0.026337	0.498321	1.26689	0.298532	3.58719	0.026337	0.096113	30000000000	24600000000		419000000	38883000	30230000000		19420000000	21810000000											0.303621	2.80329	1.9892	1.20041	0.035096	C39	1.26689	0.721231	0.027266	0.083473	0.125175	1.46479	0.278175		362145		45960	111
0	0	0	0.271826	0.661685	-0.0013004	0.011286	0.271826	1.45906	0.525892	2.95582	0.011286	0.035625	53000000000	44530000000		893700000	55326000	53480000000		30520000000	35390000000											0.768779	-4.32875	-9.6216	-1.97132	0.19847	C39	1.45906	0.661685	0.009448	0.026111	0.106401	0.969249	0.388744	2	333862	3	51673	0
0	0	0	0.210719	0.500101	0.028275	0.026214	0.210719	1.98326	0.867347	2.0004	0.026214	0.089419	74000000000	48220000000		1361000000	354000000	74010000000		38110000000	54730000000											0.384013	-0.383716	-0.326585	-0.63052	0.025238	C39	1.26551	0.739467	0.021723	0.086659	0.108693	0.820808	0.181963	2	726726	3	56190	0
0	0	0	0.232779	0.74628	0.0365278	0.016555	0.232779	1.13113	0.220268	3.94135	0.016555	0.064415	80000000000	51180000000	0	1799000000	508600000	79740000000	0	45250000000	59510000000											0.077424	0.914973	0.887221	0.823771	0.119537	C39	1.13113	0.74628	0.020365	0.062903	0.113091	0.870883	0.224024	2	566807	3	68935	0
0	0	0	0.254588	0.744391	0.0341311	0.036555	0.254588	1.29013	0.254138	3.91223	0.036555	0.143549	78000000000	47930000000	0	1873000000	642100000	78080000000	0	37150000000	58120000000											-0.020869	0.690144	0.775389	-0.022758	0.099571	C39	1.29012	0.744391	0.039224	0.144537	0.120331	1.09277	0.204983	2	483575	3	73809	0
1	0	0	0.38674	0.710795	0.05544	0.049518	0.38674	1.15641	0.220673	3.45775	0.049518	0.180814	93000000000	55480000000	0	2243000000	1048000000	92880000000	0	47980000000	66020000000											0.1895	0.185223	0.138959	0.274584	0.251808	C39	1.15641	0.710795	0.055809	0.157582	0.131733	1.08777	0.163331	2	368079	3	76320	181
1	0	0	0.466135	0.663286	0.0826274	0.031569	0.466135	0.995864	0.237272	2.96988	0.031569	0.100171	110000000000	53750000000	0	2984000000	1177000000	111800000000	0	53970000000	74130000000											0.203258	0.18964	0.006128	-1.69859	0.110913	C39	0.995864	0.663286	0.037556	0.085837	0.12725	0.935794	0.165093	2	586602	2	29810	187
1	0	0	0.27393	0.689087	0.133583	0.016513	0.27393	1.12823	0.353909	3.21633	0.016513	0.051275	150000000000	75920000000		4755000000	1158000000	147100000000		67290000000	101400000000	106500000000	106500000000	108800000000	88470000000	9628000000	8492000000	816300000	2797000000	659400000	2138000000	0.316603	-0.922285	-0.729194	-1.47182	-0.01942	C39	1.12823	0.689087	0.020076	0.046725	0.130173	0.723636	0.235766	2	512718	3	79561	244
1	0	0	0.328823	0.662227	0.152531	0.02306	0.328823	1.10863	0.322241	2.96057	0.02306	0.070972	160000000000	80100000000		6373000000	872800000	160300000000		72250000000	106200000000	111600000000	111600000000	111600000000	88660000000	9511000000	9456000000	1665000000	4790000000	1245000000	3545000000	0.089422	-0.625552	-0.519046	-0.786439	-0.022556	C39	1.10863	0.662227	0.032503	0.065469	0.13217	0.69608	0.259939	2	467540	2	75059	189
0	0	0	0.77088	0.008755	-0.0765617	0.074157	0.77088	0.08492	0.075484	1.00883	0.074157	0.144739	1200000000	1202000000		41215	0	1219000000		463900000	585100000											0.120251	6.52538	6.40763	6.46742	4.30462	K70	2.59049	0.480059	0.067518	0.134971	0.014902	0.404711	0.260828	2	31935	3	122	0
0	0	0	2.3064	0.347549	-0.0767127	0.08598	2.3064	4.16369	0.4374	1.53268	0.08598	0.147424	1100000000	1101000000		100435	0	1114000000		264500000	387200000											-0.086039	-0.254629	-0.29728	-0.402178	-0.235661	K70	4.16369	0.347549	0.08743	0.137983	0.017397	0.325378	0.244805	2	42339	3	138	0
0	0	0	1.61149	0.314051	-0.0768317	0.009301	1.61149	0.826539	0.001226	1.45783	0.009301	0.013634	1000000000	977300000		83886.5	0	1031000000		102100000	294600000											-0.074129	1.77169	1.97684	2.17252	20.2174	K70	9.57335	0.285637	0.009737	0.013541	0.003219	0.076514	0.342542		34784		140	0
0	0	0	0.717566	0.627183	-0.0761712	0.00625	0.717566	0.157106	0.001046	2.68228	0.00625	0.010951	1500000000	1186000000		58194.5	0	1490000000		615100000	787700000											0.358729	1.69395	1.431	1.29358	5.23809	K70	1.92804	0.528672	0.007423	0.01122	0.084515	0.070545	0.409731		29774		160	0
0	0	0	0.947261	0.574363	-0.0759329	0.001482	0.947261	1.78153	0.017448	2.34942	0.001482	0.003313	1700000000	1347000000	0	5.34552e+06	0	1655000000	0	756200000	950800000											0.111024	-0.589986	-1.5979	-3.38254	1.48704	K70	1.78153	0.574363	0.005773	0.003308	0.160259	0.051287	0.679108	1	26733	3	170	0
0	0	0	0.647725	0.706744	-0.0744054	0.042045	0.647725	3.54711	0.162128	3.40999	0.042045	0.122441	2700000000	2404000000	0	6.04276e+06	0	2716000000	0	677700000	1920000000											0.640716	41.6987	58.1075	63.0196	2354.55	K70	3.54711	0.706744	0.034276	0.115378	0.055511	0.26849	0.25599	1	24084	3	177	0
1	0	0	2.23287	0.673085	-0.0746767	0.011374	2.23287	1.52692	0.006038	3.0589	0.011374	0.036753	2500000000	2411000000	0	6.2345e+06	0	2528000000	0	1579000000	1701000000											-0.069373	-5.76003	-5.54294	-5.19568	12.9948	K70	1.52692	0.673085	0.023655	0.036089	0.0131	0.062377	0.055831	1	12113	3	172	0
1	0	0	3.75005	0.630016	-0.0717649	0.01556	3.75005	2.52577	0.231863	2.70282	0.01556	0.043879	4500000000	3509000000	0	5.39199e+06	0	4550000000	0	1389000000	2866000000											0.799897	1226.73	6.53221	6.39773	0.542145	K70	2.52577	0.630016	0.026983	0.03271	0.225592	0.226661	0.186937	2	22545	3	11726	4023
1	0	0	1.91997	0.65133	-0.067948	0.126427	1.91997	0.957744	0.424234	2.86804	0.126427	0.354214	7200000000	3289000000		639400000		7200000000		3434000000	4690000000	1296000000	1296000000	1305000000	960500000	58650835	138100000	125500000	1029000000	286100000	742700000	0.582539	-7.30025	-3.55284	-3.5073	0.244921	Q83	0.957744	0.65133	0.120591	0.295861	0.216667	0.180064	0.278063	2	25804	3	12100	4315
1	0	0	1.79703	0.68845	-0.0673427	0.024873	1.79703	0.711852	0.078853	3.20976	0.024873	0.075469	7600000000	2832000000		619400000	1.13917e+06	7620000000		3978000000	5246000000	2116000000	2116000000	1893000000	1449000000	96960781	165000000	137300000	232000000	47651074	184300000	0.058375	-0.378184	-0.339454	-0.231573	0.51886	Q83	0.711852	0.68845	0.042199	0.077636	0.403056	0.277703	0.205422	2	16166	3	18022	5801
0	0	0	0.911893	0.20936	-0.076653	0.039662	0.911893	2.35905	1.09063	1.2648	0.039662	0.049013	1200000000	651100000		2.7586e+06	0	1155000000		252900000	259700000											0.100219	-18.8737	-5.75931	-5.69089	2.60022	O81	2.57436	0.224753	0.058865	0.04883	0.05513	0.554837	-0.07946	2	47802	3	328	32
0	0	0	2.79815	0.168905	-0.0767053	0.025569	2.79815	2.96141	1.44149	1.20323	0.025569	0.032428	1100000000	620200000		19634770	0	1119000000		216300000	221400000											-0.031479	0.022024	0.237825	0.22507	0.205135	O81	2.86706	0.197865	0.013944	0.032394	0.023065	0.630862	0.283014	1	35704	3	314	46
0	0	0	3.3508	0.190006	-0.0767498	0.00702	3.3508	3.16773	0.90273	1.23458	0.00702	0.00871	1100000000	639400000		19194085	0	1088000000		201800000	206800000											-0.027596	-2.89015	-6.41465	-6.32627	1.55997	F52	3.16773	0.190006	0.009649	0.00879	0.002043	0.859984	0.23937		43163		291	63
0	0	0	2.14771	0.272902	-0.0766102	-0.009551	2.14771	2.56592	1.02132	1.37533	-0.009551	-0.012456	1200000000	817900000		19178074	0	1185000000		318800000	323400000											0.089084	2.59835	3.29509	2.91987	0.839334	F52	2.56592	0.272902	-0.0102	-0.012599	0.000941	0.876145	0.255715	1	44456	3	288	76
0	0	0	1.21885	0.45525	-0.075918	0.030937	1.21885	1.76019	1.14793	1.8357	0.030937	0.049854	1700000000	1327000000	0	18700315	0	1666000000	0	753700000	758400000											0.405567	1.56581	1.63847	1.64392	0.948011	F51	1.76019	0.45525	0.018815	0.048598	0.013703	1.00505	0.314106	1	38365	3	256	0
0	0	0	0.867763	0.606677	-0.0747312	0.044539	0.867763	1.49054	1.05409	2.54244	0.044539	0.098099	2500000000	2245000000	0	18222242	0	2490000000	0	1506000000	1511000000											0.494675	0.159706	0.957034	0.95677	1.13263	F51	1.49054	0.606677	0.03356	0.0945	0.003759	0.624567	0.384866	1	34577	3	234	0
1	0	0	1.91904	0.656582	-0.0741123	0.041665	1.91904	1.38702	1.18373	2.9119	0.041665	0.113717	2900000000	2653000000	0	17739910	0	2920000000	0	1912000000	1917000000											0.172587	-1.38448	-0.972485	-1.01518	-0.022144	F51	1.38702	0.656582	0.03332	0.112395	0.041789	0.869272	0.359673	1	24779	3	308	0
1	0	0	2.99451	0.579701	-0.0748381	0.050351	2.99451	1.56181	1.23984	2.37926	0.050351	0.133124	2400000000	2180000000	0	17497412	0	2416000000	0	1396000000	1400000000											-0.172613	2.27074	1.74074	1.7125	7.44612	F51	1.56181	0.579701	0.032876	0.132295	0.040653	0.501904	0.197683	1	41800	2	383	141
1	0	0	2.8028	0.517535	-0.0753378	0.044994	2.8028	1.67434	1.20738	2.07269	0.044994	0.100214	2100000000	1784000000		22323746		2069000000		1066000000	1071000000	1767000000	1767000000	1639000000	1562000000	53364010	76775174	-64384959	132500000	31642872	100900000	-0.143619	0.203061	0.632494	0.527603	3.14578	F51	1.67434	0.517535	0.017644	0.101078	0.020996	0.85432	0.238763	1	35718	2	405	146
1	0	0	1.68932	0.54077	-0.0752109	0.041858	1.68932	1.51895	1.0511	2.17756	0.041858	0.088945	2200000000	1764000000		21306271		2157000000		1162000000	1166000000	2229000000	2229000000	2129000000	1921000000	77333413	96183249	27439555	104900000	16459946	88435880	0.042569	0.634803	0.683602	0.75976	0.084118	F51	1.51895	0.54077	0.053726	0.089287	0.040212	1.03329	0.156917	1	37360	2	393	140
0	0	0	0.74954	0.438817	-0.0766385	0.013484	0.74954	1.10651	0.215863	1.78195	0.013484	0.023508	1200000000	562200000		69367421	0	1166000000		508100000	511500000											0.070674	0.104478	-0.002115	0.17534	-0.090494	C27	1.10651	0.438817	0.028068	0.023235	0.253598	0.749692	0.262006	2	43872	3	4735	52
0	0	0	1.62846	0.387983	-0.076581	0.019997	1.62846	1.44879	0.230136	1.63394	0.019997	0.035575	1200000000	575600000		66449405	1320000	1205000000		454300000	526800000											0.034248	-0.768518	-0.391046	-0.672859	-0.050755	C27	1.26697	0.436987	0.032767	0.03493	0.245411	0.792797	0.261831	2	41113	3	4659	83
0	0	0	2.04	0.395465	-0.0764797	0.032625	2.04	1.03806	0.069861	1.65417	0.032625	0.056512	1300000000	546500000		145700000	2374000	1276000000		479000000	522000000											0.058365	-0.609925	-0.386638	-0.792877	-0.092284	C27	1.14096	0.40916	0.042557	0.053696	0.190058	0.841947	0.230063	2	41704	2	4908	85
0	0	0	1.19528	0.445046	-0.0764186	0.007651	1.19528	1.14983	0.037856	1.80195	0.007651	0.013066	1300000000	562400000		161600000	3644068	1318000000		549700000	553000000											0.033232	-3.15175	-2.22525	-3.44418	-0.1761	C27	1.02317	0.419497	0.019731	0.012969	0.159132	1.1504	0.280586		42590		4966	82
0	0	0	1.16158	0.465688	-0.0762281	0.013069	1.16158	1.01607	0.107476	1.87156	0.013069	0.023492	1500000000	621500000	0	161900000	6.28146e+06	1450000000	0	611700000	675500000											0.095283	-0.577144	-0.566641	-1.12239	-0.196956	C27	1.01607	0.465688	0.026611	0.023344	0.157277	1.1429	0.284459	1	38527	2	5467	82
0	0	0	1.23216	0.467801	-0.0754641	0.015846	1.23216	1.40667	0.471597	1.87899	0.015846	0.029725	2000000000	921500000	0	161200000	10943141	1981000000	0	655100000	926700000											0.365764	-0.528397	-0.37911	-0.244918	0.100202	C27	1.40667	0.467801	0.024725	0.025788	0.205519	0.772277	0.339269	2	33699	2	4992	82
1	0	0	1.72285	0.487414	-0.0750947	0.019493	1.72285	1.00993	0.178866	1.95089	0.019493	0.037358	2200000000	948000000	0	160300000	14386426	2238000000	0	938600000	1091000000											0.087151	-0.696344	-0.574894	-0.755817	0.03619	C27	1.00993	0.487414	0.031622	0.035849	0.240231	0.759294	0.270896	2	21980	2	4703	82
1	0	0	1.61562	0.537108	-0.0747305	0.019064	1.61562	0.943412	0.111511	2.16033	0.019064	0.039119	2500000000	1180000000		123500000	14997966	2490000000		1251000000	1338000000	2034000000	2034000000	1979000000	1492000000	265500000	161100000	27451896	66560828	20849587	45711240	0.067292	-0.834351	-0.648173	-0.532833	0.486513	C27	0.943412	0.537108	0.029378	0.039653	0.272057	0.816618	0.313241	2	32736	2	4593	81
1	0	0	0.906193	0.559038	-0.0743311	0.024856	0.906193	1.00424	0.137634	2.26777	0.024856	0.055071	2800000000	1496000000		119800000	16463571	2768000000		1490000000	1547000000	2578000000	2578000000	2504000000	1789000000	463200000	178300000	31321025	96685814	31337673	65348141	0.111365	-0.701898	-0.545937	0.103231	0.246285	C27	1.00424	0.559038	0.034927	0.053544	0.243859	0.931492	0.324119	2	34790	2	4571	81
0	0	0	0.907894	0.246229	-0.07406	0.051232	0.907894	0.671218	0.086163	1.32666	0.051232	0.078966	3000000000	691100000		87763407	0	2956000000		787400000	1042000000											0.063125	-1.55678	-1.66544	-1.74275	-0.203228	C26	0.877726	0.352525	0.065728	0.076776	0.013802	0.893837	0.145689	2	41312	3	5031	2311
0	0	0	1.3092	0.396789	-0.0736846	0.023651	1.3092	0.972422	0.259951	1.65779	0.023651	0.037878	3200000000	761300000		78422861	0	3217000000		782900000	1276000000											0.08729	-0.999738	-1.41028	-1.36882	0.055024	C26	0.972422	0.396789	0.034583	0.03762	0.016017	0.699902	0.088586	2	47873	3	4877	2357
0	0	0	0.97118	0.495575	-0.0734523	-0.050439	0.97118	0.668796	0.165574	1.98246	-0.066347	-0.12006	3400000000	799200000		71022525	0	3378000000		1195000000	1674000000											0.050152	4.0546	5.76639	4.66531	-0.125304	C26	0.668796	0.495575	-0.054446	-0.128388	0.021242	0.593784	0.180772	1	41214	3	4891	2428
0	0	0	0.648326	0.523088	-0.0738382	-0.050439	0.648326	0.468131	0.139171	2.09682	-0.06867	-0.139791	3100000000	602800000		62690845	0	3110000000		1288000000	1627000000											-0.079321	6.96601	7.72139	11.6448	-0.296065	C26	0.468131	0.523088	-0.053122	-0.150193	0.0117	0.638911	0.16749		40324		4842	2481
0	0	0	0.592924	0.536233	-0.0737735	0.000496	0.592924	0.552829	0.232579	2.15626	0.000496	0.001055	3200000000	835600000	0	54930758	0	3155000000	0	1512000000	1692000000											0.014426	5.14232	8.66192	10.7068	0.187168	C26	0.552829	0.536233	0.020887	0.001062	0.019806	0.671919	0.268407	1	33475	3	4696	2616
0	0	0	0.5079	0.74215	-0.0740924	-0.050439	0.5079	0.638428	0.195272	3.87822	-0.233908	-0.64163	2900000000	1018000000	0	48241590	0	2933000000	0	1595000000	2177000000											-0.085264	4.69768	2.85279	2.83035	0.061128	C26	0.638428	0.74215	-0.20842	-0.941385	0.027567	0.617335	-0.091855	1	32359	3	3937	2815
1	0	0	2.41624	1.64989	-0.0763729	-0.050439	2.41624	0.226729	0.085419	-1.53873	-0.768914	27.2368	1300000000	459900000	0	29290842	0	1350000000	0	2028000000	2227000000											-0.546165	8.99368	7.61794	7.76971	-0.620052	C26	0.226729	1.64989	-1.12032	1.87707	0.040411	0.623836	-0.046108	1	28381	3	1625	2986
1	0	0	6.07244	3.2619	-0.0772804	-0.050439	6.07244	0.141229	0.021293	-0.442107	-0.686623	0.567221	720000000	319900000	0	25572307	0	719800000	0	2265000000	2348000000											-0.46874	7.63675	7.53212	7.43295	-0.234111	C26	0.141229	3.2619	-0.857621	0.436433	0.114475	0.444047	-0.008687	1	29426	2	1416	3066
1	0	0	1.12865	0.458189	-0.0685453	0.078444	1.12865	2.41142	0.408274	1.84566	0.078444	0.116855	6800000000	3458000000		36699556		6785000000		1434000000	3109000000	6509000000	6509000000	6239000000	6131000000	2.67347e+06	67398689	26592080	293900000	-87612879	381500000	0.141944	0.274854	-0.468353	-0.43326	0.454755	C26	2.41142	0.458189	0.060151	0.103786	0.181795	0.959311	-0.298069	1	62684	2	188	0
0	0	0	3.38163	0.74873	-0.0734442	0.094706	3.38163	0.457171	0.254534	3.97978	0.094706	0.533996	3400000000	724100000	0	167300000	0	3384000000	0	1584000000	2533000000											0.09653	-0.349533	-0.41277	-0.583155	-0.169991	R86	0.457171	0.74873	0.064612	0.204409	0.149151	0.445862	0.028217	2	19014	3	3802
0	0	0	4.63676	0.643314	-0.0709945	0.060331	4.63676	0.581073	0.355867	2.80359	0.060331	0.191792	5100000000	1344000000	0	211200000	0	5085000000	0	2313000000	3271000000											0.464391	0.113022	0.090896	-0.243141	0.279875	R86	0.581073	0.643314	0.057773	0.140851	0.157914	0.354248	0.003328	2	23451	2	4371
1	0	0	5.11637	0.602917	-0.0703124	0.072137	5.11637	0.661145	0.390406	2.51837	0.072137	0.190949	5600000000	1491000000	0	225400000	0	5558000000	0	2255000000	3351000000											0.093154	0.913404	-0.419092	-0.397024	0.131986	R86	0.661145	0.602917	0.071927	0.173928	0.13363	0.433886	0.007794	2	19216	3	4679
1	0	0	3.70919	0.269583	-0.0600631	0.058418	3.70919	3.45281	1.147	1.36908	0.058418	0.092904	13000000000	7603000000	0	229000000	0	12670000000	0	2202000000	3417000000											1.28042	-0.143052	-0.137555	-0.074233	0.321683	R86	3.45281	0.269583	0.039779	0.057526	0.164806	0.225528	0.026096	2	46276	3	4759	0
1	0	0	1.82938	0.279278	-0.0581076	0.044976	1.82938	3.25198	0.959519	1.3875	0.044976	0.062009	14000000000	8109000000		260500000		14030000000		2493000000	3919000000	3081000000	3081000000	2495000000	1698000000	474700000	362100000	-113900000	612300000	11684704	600600000	0.107128	-0.118054	-0.119719	-0.211272	0.139039	R86	3.25198	0.279278	0.034687	0.059385	0.166511	0.21957	0.019083	2	41833	3	4952	0
1	0	0	1.13314	0.280398	-0.0575496	0.04507	1.13314	3.22372	0.75293	1.38966	0.04507	0.062584	14000000000	8389000000		314800000		14420000000		2602000000	4043000000	3209000000	3209000000	2642000000	1776000000	511400000	414300000	-102200000	641900000	746845	641200000	0.02761	0.024269	0.023012	0.111519	0.267476	R86	3.22372	0.280398	0.037377	0.061791	0.194738	0.222555	0.001163	1	39676	3	4937	0
0	0	0	0.73835	0.771943	-0.0451491	0.100987	0.73835	1.07852	0.25918	4.38487	0.100987	0.354041	23000000000	14010000000		2300000000	0	23030000000		12990000000	17780000000											1.69929	-0.595071	-0.442735	-0.65187	-0.01065	C35	1.07852	0.771943	0.083118	0.303433	0.272409	0.58829	0.107244		84074		18681	0
0	0	0	1.28315	0.77615	-0.0294748	0.084952	1.28315	1.05361	0.1783	4.46729	0.084952	0.376644	34000000000	20480000000		2339000000	0	33910000000		19430000000	26320000000											0.466766	0.177236	0.111303	0.079189	0.070483	C35	1.05361	0.77615	0.081466	0.318612	0.244366	0.61219	0.144505		85632		18511
0	0	0	1.30125	0.45134	0.0124059	0.094685	1.30125	2.13375	0.83939	1.82262	0.094685	0.261674	63000000000	44370000000		2375000000	0	63000000000		25980000000	35520000000											0.85747	0.688425	0.648039	0.62807	0.061303	C35	1.70765	0.563865	0.079694	0.16699	0.215802	0.511033	0.152905	2	527886	2	22356
0	0	0	0.827847	0.502181	0.0247718	0.121467	0.827847	1.83914	0.600427	2.00876	0.121467	0.259022	72000000000	49020000000		2606000000	0	71580000000		26650000000	35950000000											0.134749	0.625429	0.54034	0.571223	0.447835	C35	1.83914	0.502181	0.115732	0.229364	0.251671	0.647128	0.14883	2	485756	2	28833
0	0	0	0.797665	0.53707	0.0498199	0.093786	0.797665	1.92802	0.57769	2.16015	0.093786	0.196006	89000000000	67030000000	0	2731000000	0	88970000000	0	34770000000	47790000000											0.242977	-0.707925	-0.653415	-0.69658	-0.102741	C35	1.92802	0.53707	0.088247	0.182791	0.393174	0.540281	0.150052	1	389156	2	31707	0
0	0	0	0.469051	0.530345	0.0506303	0.044276	0.469051	2.10548	0.504415	2.12922	0.044276	0.094951	90000000000	69530000000	0	2931000000	0	89540000000	0	33020000000	47490000000											0.006324	-0.946408	-1.10609	-1.15303	0.104483	C35	2.10548	0.530345	0.042613	0.093977	0.721459	0.430456	0.126059	2	444277	2	27028	0
1	0	0	0.58026	0.56006	0.0567089	0.006851	0.58026	2.93249	0.573318	2.27304	0.006851	0.015075	94000000000	74080000000	0	3307000000	0	93760000000	0	25260000000	52510000000											0.04714	-4.82918	-3.72721	-5.68637	0.053278	C35	2.93249	0.56006	0.014648	0.015222	1.17748	0.275723	0.272568	2	436293	2	20314	0
1	0	0	0.437492	0.566712	0.0566586	0.000972	0.437492	2.47112	0.380575	2.30793	0.000972	0.002227	94000000000	74580000000	0	4640000000	93265324	93720000000	0	30180000000	53110000000											-0.000373	-4.06078	-3.36579	-1.5858	0.32372	C35	2.47112	0.566712	0.014452	0.002245	1.43324	0.221433	-1.73858	2	460740	2	19141	0
1	0	0	0.390338	0.576009	0.0500598	-0.009896	0.390338	2.56215	0.244418	2.35854	-0.009896	-0.023081	89000000000	68920000000		4793000000	90387883	89140000000		26900000000	51350000000	20020000000	20020000000	21960000000	15240000000	2446000000	1734000000	1035000000	-1015000000	-110400000	-904800000	-0.048889	-3.41594	-2.60917	101.497	0.160939	C35	2.56215	0.576009	0.001466	-0.02394	1.50412	0.224616	0.108761	2	395238	2	15154	0
1	0	0	0.418999	0.540256	0.0414305	0.014487	0.418999	2.5354	0.292117	2.17512	0.014487	0.032832	83000000000	62040000000		4100000000	84417256	83150000000		24470000000	44920000000	23270000000	23270000000	33120000000	18300000000	2451000000	1769000000	1504000000	1241000000	-6.5611e+06	1248000000	-0.067219	-0.865355	-0.334278	-0.07725	0.067551	C35	2.5354	0.540256	0.033097	0.032646	0.929465	0.279894	-0.005285	2	379875	2	13461	0
0	0	0	0.483675	0.449843	-0.0720456	0.02935	0.483675	1.32637	0.552744	1.81766	0.02935	0.060371	4400000000	1996000000		416700000	0	4355000000		1689000000	2108000000											0.207529	8.76376	5.32289	-6.39211	-0.123773	C17	1.18208	0.484158	0.041234	0.051978	0.039612	0.68986	0.015958	2	35324	3	18079	335
0	0	0	1.56844	0.422693	-0.0721653	0.017381	1.56844	1.24557	0.477044	1.73218	0.017381	0.032792	4300000000	1953000000		184800000	0	4272000000		1800000000	1946000000											-0.019081	-3.32201	-3.11193	4.83145	0.866729	C17	1.08515	0.455477	0.027379	0.03223	0.043407	0.724762	-0.003704	2	38656	3	17337	334
0	0	0	1.01108	0.463955	-0.0714875	0.012178	1.01108	1.14763	0.42477	1.86552	0.012178	0.023357	4700000000	2382000000		227000000	0	4742000000		2331000000	2368000000											0.110175	0.75564	0.969091	0.67293	0.170442	C17	1.02196	0.49943	0.019589	0.023122	0.033066	0.780392	0.295347		42274		17951	348
0	0	0	0.542089	0.502804	-0.070697	0.0114	0.542089	1.05266	0.223019	2.01128	0.0114	0.023885	5300000000	2770000000		150800000	0	5291000000		2837000000	2876000000											0.115741	22.8257	14.4943	-43.1916	-0.202522	C17	0.976625	0.543603	0.025909	0.023683	0.01723	0.889205	0.077519		42307		16741	353
0	0	0	0.426272	0.575353	-0.0700839	0.002126	0.426272	1.18968	0.283789	2.3549	0.002126	0.004832	5700000000	3076000000	0	203300000	0	5717000000	0	2586000000	3289000000											0.080466	-7.14175	-7.90676	5.0275	1.11583	C17	1.18968	0.575353	0.022902	0.00482	0.012456	0.878543	0.264392	1	40773	3	13042	0
0	0	0	0.515496	0.576942	-0.0700027	0.003054	0.515496	1.16186	0.119202	2.36374	0.003054	0.007204	5800000000	3082000000	0	198800000	0	5773000000	0	2652000000	3331000000											0.009861	-6.06904	-6.55086	2.68168	0.209059	C17	1.16186	0.576942	0.022529	0.007182	0.018877	1.01458	0.186907	1	33791	3	8768	0
1	0	0	1.24143	0.554528	-0.0703196	0.004284	1.24143	0.92969	0.062337	2.24481	0.004284	0.009871	5600000000	2731000000	0	194200000	0	5553000000	0	2937000000	3079000000											-0.03812	-7.91841	-7.84135	1.15326	0.325635	C17	0.92969	0.554528	0.027386	0.009808	0.006281	1.18284	-0.101895	1	29820	2	5826	0
1	0	0	2.36467	0.503495	-0.0625591	0.030157	2.36467	1.16122	0.184565	2.01408	0.030157	0.062916	11000000000	5967000000	0	267100000	24510168	10940000000	0	5139000000	5509000000											0.970384	-9.21865	-10.6133	-3.35882	0.65363	C17	1.16122	0.503495	0.035317	0.045782	0.142679	0.813567	0.131651	2	37376	2	5782	0
1	0	0	1.24124	0.551411	-0.059877	0.029225	1.24124	1.31963	0.322506	2.22921	0.029225	0.062094	13000000000	7571000000		256700000	68938757	12800000000		5737000000	7060000000	10970000000	10970000000	11060000000	10140000000	191000000	293100000	201400000	335700000	-11334954	347000000	0.170202	-11.001	-10.0909	-0.471534	1.22395	C17	1.31963	0.551411	0.042826	0.060412	0.170511	0.857088	-0.033769	2	38195	2	5911	364
1	0	0	1.02616	0.52987	-0.0598986	0.027744	1.02616	1.30382	0.216942	2.12707	0.027744	0.060399	13000000000	7564000000		245200000	109700000	12790000000		5801000000	6777000000	11250000000	11250000000	11540000000	10440000000	212000000	338300000	221500000	347500000	-7563998	355000000	-0.00117	20.5511	15.6693	14.4853	2.55727	C17	1.30382	0.52987	0.045081	0.059049	0.206413	0.879997	-0.021769	2	52947	2	5054	366
0	0	0	1.05775	0.456378	-0.0756312	0.095042	1.05775	1.83006	0.833816	1.83951	0.095042	0.185301	1900000000	951400000		97678830	0	1865000000		519900000	851100000											0.39808	-0.735991	-0.757349	-0.846044	0.000891	C25	1.83006	0.456378	0.087515	0.148015	0.005823	0.413188	0.166138	2	31461	3	2153	1323
0	0	0	1.96151	0.235295	-0.0750017	0.072305	1.96151	1.08917	0.092043	1.30769	0.072305	0.138247	2300000000	1182000000		156600000	0	2302000000		601900000	1136000000											0.248687	1.25113	0.915548	0.971407	0.22652	C25	1.96357	0.493682	0.076005	0.129248	0.030766	0.224804	0.152704	2	31461	3	1931	1314
0	0	0	2.24511	0.467699	-0.0736443	0.133447	2.24511	2.02125	0.541145	1.87864	0.234303	0.449272	3200000000	2336000000		131900000	0	3245000000		1156000000	1517000000											0.409434	17.6659	17.8347	36.399	0.043613	C25	2.02125	0.467699	0.211175	0.376237	0.071465	0.230209	0.187912		101464		536	1159
0	0	0	1.22971	0.257307	-0.0737416	0.103675	1.22971	2.76392	0.916651	1.34645	0.103675	0.177365	3200000000	2101000000		141600000	0	3177000000		877400000	1151000000											-0.020818	1.13731	0.698293	0.650842	0.308202	C25	2.39485	0.362134	0.118089	0.164262	0.121856	0.389606	0.161111	1	95287	3	591	848
0	0	0	1.03573	0.302494	-0.0740153	0.032852	1.03573	2.43663	0.510464	1.43368	0.032852	0.049271	3000000000	1941000000	0	93593200	0	2987000000	0	796700000	903600000											-0.059816	-4.29872	-5.39328	-4.25772	0.008149	F51	2.43663	0.302494	0.048012	0.048598	0.058406	0.4688	0.170271	1	87006	3	573	821
0	0	0	1.16938	0.30427	-0.0740211	0.011759	1.16938	2.49428	0.739261	1.43734	0.011759	0.016881	3000000000	1974000000	0	103000000	0	2983000000	0	791300000	907600000											-0.001342	-1.91418	-1.29483	-1.39434	0.014125	F51	2.49428	0.30427	0.026056	0.016914	0.154407	0.35819	0.421083	1	79321	3	593	824
1	0	0	1.6485	0.264477	-0.0740423	0.044555	1.6485	3.07958	0.595668	1.35958	0.044555	0.062264	3000000000	1942000000	0	102600000	0	2968000000	0	630600000	785000000											-0.004941	0.030897	0.187113	0.182641	-0.60728	F51	3.07958	0.264477	0.05516	0.060726	0.110834	0.396395	0.328587	1	71414	3	671	803
1	0	0	1.51733	0.260288	-0.07407	0.020305	1.51733	3.13188	0.515392	1.35188	0.020305	0.027528	2900000000	1889000000	0	83463844	0	2949000000	0	603200000	767600000											-0.00649	-2.06128	-2.10151	-1.92112	3.19979	F51	3.13188	0.260288	0.032322	0.027539	0.171212	0.230498	0.348471	1	55694	3	614	753
1	0	0	1.31237	0.292732	-0.0738292	0.011826	1.31237	2.55604	0.322818	1.41389	0.011826	0.016357	3100000000	1958000000		67530321		3116000000		765900000	912200000	523800000	523200000	556600000	432600000	26598447	77269320	2.14875e+06	48415326	12550112	35865214	0.056716	-0.194022	-0.103871	-0.098847	-0.163132	F51	2.55604	0.292732	0.012199	0.016273	0.212979	0.167895	0.259218	1	54064	3	529	291
1	0	0	0.834665	0.310459	-0.0739421	-0.023117	0.834665	2.24827	0.333416	1.45024	-0.023117	-0.033094	3000000000	1904000000		67372679		3038000000		846800000	943100000	356000000	355200000	487300000	314500000	22429056	68230830	36601341	-71606743	-475383	-71131360	-0.025152	-3.53708	-2.05436	-2.11387	-0.158039	F51	2.24827	0.310459	-0.011367	-0.033957	0.30133	0.116926	0.006639	1	58748	3	400	709
1	0	0	0.477009	0.844513	0.402074	0.052549	0.477009	0	0	6.4314	0.052549	0.333536	330000000000	0	0	113300000	0	333600000000	0	0	281700000000											0.648791	2.38719	2.40462	2.44821	0.453981	J67		0.844513	0.037259	0.239627	0.083381	0.068434	0.291695	2	357880	2	14807
1	0	0	0.455022	0.803719	0.31843	0.018154	0.455022	0	0	5.09474	0.018154	0.104367	280000000000			117200000		275500000000			221400000000	11820000000		8483000000					6385000000	857000000	5528000000	-0.174117	-0.100678	0.012356	-0.039156	-0.16011	J67		0.803719		0.102237	0.124035	0.042922	0.134219	2	331418	2	13831	353
1	0	0	0.359081	0.809945	0.353647	0.016425	0.359081	0	0	5.26163	0.016425	0.085088	300000000000			142000000		299900000000			242900000000	9234000000		7425000000					5927000000	1202000000	4726000000	0.088766	-0.317198	-0.325325	-0.323837	-0.197566	J67		0.809945		0.0829	0.165204	0.030785	0.20274	2	312555	2	14129	419
0	0	0	1.08615	0.335575	-0.0728251	0.047958	1.08615	1.75309	0.171029	1.50506	0.047958	0.070342	3800000000	1659000000		397900000	0	3813000000		980400000	1348000000											0.212482	-0.435334	-0.463041	-3.82762	0.129714	C17	1.69212	0.353383	0.052008	0.067668	0.051966	0.213107	0.240821	2	182324	3	563	0
0	0	0	2.201	0.352886	-0.0727373	0.023583	2.201	1.26494	0.321096	1.54532	0.023583	0.036652	3900000000	1382000000		866100000	0	3874000000		1095000000	1394000000											0.015986	-0.102085	0.014285	0.082979	-0.10123	C17	1.26131	0.359717	0.03579	0.036543	0.095627	0.191827	0.292501	2	158185	3	602	0
0	0	0	1.66011	0.304585	-0.0729272	0.018798	1.66011	1.92363	0.424275	1.43799	0.018798	0.02849	3700000000	1746000000		248300000	0	3743000000		943400000	1197000000											-0.034048	-2.25695	-1.92281	-1.15678	-0.868866	S90	1.85097	0.319968	0.021869	0.02813	0.427325	0.244916	0.335735		154049		619	0
0	0	0	0.996958	0.262025	-0.0733016	0.029838	0.996958	1.7793	0.548338	1.35506	0.029838	0.042237	3500000000	1262000000		217800000	0	3483000000		717800000	923400000											-0.06946	-0.614587	-0.440428	-0.442762	0.601751	S90	1.75812	0.265155	0.029105	0.04212	0.072102	0.307997	0.281879	1	145465	3	625	0
0	0	0	1.05068	0.247966	-0.0731573	0.045176	1.05068	1.62751	0.628562	1.32973	0.045176	0.060756	3600000000	1145000000	0	313400000	0	3583000000	0	703800000	888400000											0.028776	-0.680817	-0.677168	-0.685894	0.26026	D44	1.62751	0.247966	0.03836	0.059232	0.04188	0.244314	0.242122	1	137011	3	625	0
0	0	0	1.06982	0.191626	-0.0730364	0.091209	1.06982	2.39287	0.850786	1.23705	0.091209	0.116856	3700000000	1334000000	0	182300000	0	3667000000	0	557300000	702600000											0.023425	-0.715991	-0.667873	-0.040594	-0.155451	D44	2.39288	0.191626	0.078819	0.111539	0.036797	0.280088	0.26028	1	127519	3	600	0
1	0	0	1.56141	0.215455	-0.0725753	0.058728	1.56141	3.30202	0.903505	1.27462	0.058728	0.073783	4000000000	1355000000	0	465400000	0	3987000000	0	410400000	859000000											0.087324	0.257223	0.353547	0.272125	0.472661	D44	3.30202	0.215455	0.046279	0.071851	0.053085	0.197015	0.276028	1	120856	3	613	0
1	0	0	1.77723	0.264025	-0.0719695	0.039757	1.77723	2.5913	0.638754	1.35874	0.039757	0.052377	4400000000	1239000000	0	544600000	0	4408000000	0	478000000	1164000000											0.105513	-0.350035	-0.022895	0.007119	0.253267	D44	2.5913	0.264025	0.035072	0.051441	0.057939	0.15743	0.338488	1	118583	3	627	0
1	0	0	1.31197	0.302185	-0.0711627	0.031402	1.31197	1.43383	0.401705	1.43304	0.031402	0.043873	5000000000	1514000000		365700000		4968000000		1056000000	1501000000	793100000	793100000	591200000	445800000	15407919	99541314	-2.61898e+06	210700000	63507420	147200000	0.127097	-0.993595	-0.841011	-0.855596	0.137181	D44	1.43383	0.302185	0.029105	0.042464	0.050695	0.159652	0.301396	1	111599	3	655	0
1	0	0	1.46509	0.186972	-0.0719583	0.048601	1.46509	5.33911	1.65538	1.22997	0.048601	0.064626	4400000000	2278000000		183500000		4415000000		426600000	825500000	1112000000	1112000000	929800000	763600000	8.12754e+06	95944793	32815695	245700000	17737235	228000000	-0.111203	-0.4908	-0.401738	-0.328253	-0.026996	D44	5.33911	0.186972	0.059073	0.063517	0.039075	0.251855	0.072176	1	104710	3	573	0
0	0	0	0.869723	0.596883	0.0613002	0	0.869723	1.06318	0.295934	2.48067	0	0	97000000000	60230000000	0	3326000000	0	96950000000	0	56650000000	57870000000											0.104968					C38	1.06319	0.596883	0.091409	0.212318	0.065538	1.24786	0.171226	2	64617	2	109085	1859
1	0	0	0.961674	0.61983	0.094922	0.107222	0.961674	1.1004	0.072081	2.6304	0.107222	0.274639	120000000000	80490000000	0	3432000000	0	120300000000	0	73140000000	74560000000											0.240815	-0.310845	-0.323384	-0.328329	0.026161	C38	1.1004	0.61983	0.098906	0.254668	0.066085	1.1777	0.167565	2	99367	2	108120	2202
1	0	0	1.08689	0.565113	0.107235	0.109376	1.08689	1.20492	0.072042	2.29945	0.109376	0.267772	130000000000	86760000000	0	3392000000	0	128800000000	0	72000000000	72810000000											0.071076	-0.376323	-0.430676	-0.366824	-0.062305	C38	1.20492	0.565113	0.106825	0.24316	0.074918	1.0745	0.151183	2	75479	2	93299	2181
1	0	0	1.06649	0.595683	0.167375	0.105943	1.06649	1.23731	0.140314	2.47331	0.105943	0.253774	170000000000	110300000000		6869000000		170600000000		89180000000	101600000000	159400000000	159000000000	143400000000	115600000000	17680000000	9621000000	-1006000000	18910000000	3053000000	15860000000	0.324109	-0.400775	-0.38154	-0.445594	0.098041	C38	1.23731	0.595683	0.08708	0.22996	0.084596	0.932259	0.161393	2	107577	3	96418	2116
1	0	0	1.46582	0.665768	0.278995	0.088898	1.46582	1.32361	0.183318	2.99194	0.088898	0.245042	250000000000	157600000000		15170000000		248100000000		119100000000	165200000000	241700000000	240700000000	224500000000	180500000000	26740000000	14780000000	815900000	21850000000	3244000000	18610000000	0.454313	-0.448801	-0.423679	-0.349945	-0.139769	C38	1.32361	0.665768	0.078301	0.224434	0.07282	0.970196	0.148415	2	142730	3	101826	1660
0	0	0	0.511764	0.613005	-0.036167	0.093318	0.511764	1.1929	0.20074	2.58401	0.093318	0.232643	29000000000	19950000000		576900000	583988	29270000000		16720000000	17940000000											0.305275	-1.29054	-1.52704	-1.66813	-0.369985	C36	1.1929	0.613005	0.092189	0.212936	0.088575	1.13189	0.120034		80406		32027	0
0	0	0	1.48309	0.567584	-0.0261573	0.120561	1.48309	1.4216	0.218932	2.31259	0.120561	0.29254	36000000000	25120000000		911000000	585759	36220000000		17670000000	20560000000											0.237477	-0.119521	-0.091688	-0.141291	0.046839	C36	1.4216	0.567584	0.113039	0.252055	0.093477	0.980867	0.156495		47766		31995	0
0	0	0	1.6728	0.551952	-0.0031988	0.133447	1.6728	1.48621	0.358951	2.2319	0.18102	0.40988	52000000000	37690000000		918600000	0	52160000000		25360000000	28790000000											0.440158	0.273642	0.2918	0.284027	0.195256	C36	1.48621	0.551952	0.15518	0.342279	0.072338	1.21318	0.148729		162630		38174	5
0	0	0	0.852746	0.530377	0.0103166	0.111165	0.852746	1.45202	0.452766	2.12937	0.111165	0.241808	62000000000	42710000000		1155000000	2994232	61540000000		29410000000	32640000000											0.171893	-0.038763	0.030416	-0.004019	0.216615	C36	1.45202	0.530377	0.10319	0.218664	0.078933	0.975217	0.148077		176694		41426	5
0	0	0	0.763001	0.526552	0.0171945	0.050589	0.763001	1.63687	0.589336	2.11216	0.050589	0.107269	66000000000	39160000000		2160000000	431700000	66320000000		23920000000	34920000000											0.077599	0.192328	0.167456	0.044716	0.292061	C36	1.63687	0.526552	0.048619	0.103005	0.086546	0.726253	0.183228	2	158422	3	60916	0
0	0	0	0.483775	0.562831	0.0347665	0.052714	0.483775	1.64003	0.566481	2.28744	0.052714	0.116167	79000000000	48050000000	0	2273000000	497400000	78520000000	0	29300000000	44190000000											0.183977	0.365015	0.503485	0.448365	0.206912	C36	1.64003	0.562831	0.051378	0.111213	0.076152	0.742618	0.171654	2	146124	3	40984
1	0	0	0.453122	0.660711	0.0950948	0.058155	0.453122	1.3394	0.426438	2.94734	0.058155	0.15388	120000000000	64370000000	0	12720000000	533700000	120400000000	0	48060000000	79560000000											0.533482	-0.138185	-0.052573	-0.13408	0.066069	C36	1.3394	0.660711	0.048231	0.141588	0.121301	0.661374	0.169574	2	144309	3	64817
1	0	0	0.336254	0.636761	0.0871178	0.018383	0.336254	1.44854	0.527072	2.75301	0.018383	0.052377	110000000000	57750000000	0	12860000000	466100000	114900000000	0	39870000000	73150000000											-0.060383	1.2987	0.548577	0.146853	0.056951	C36	1.44854	0.636761	0.023056	0.05183	0.121766	0.641749	0.298612	2	174363	3	42446	0
1	0	0	0.242857	0.728267	0.157855	0.025792	0.242857	1.29545	0.366204	3.68008	0.025792	0.083355	160000000000	76410000000		25360000000	445800000	164000000000		58980000000	119400000000	93180000000	93180000000	89030000000	72100000000	7645000000	7652000000	198800000	4638000000	1041000000	3596000000	0.41566	1.15237	0.871251	0.830749	0.470085	C36	1.29545	0.728267	0.023142	0.080703	0.121654	0.568224	0.224552	2	142440	3	39219	4
1	0	0	0.351706	0.702829	0.194791	0.05191	0.351706	1.27865	0.334566	3.36506	0.05191	0.1819	190000000000	100300000000		23840000000	515900000	189600000000		78470000000	133300000000	151600000000	151600000000	141700000000	118500000000	10340000000	9602000000	590800000	10520000000	1344000000	9178000000	0.15961	0.333311	-0.047401	-0.066216	0.019912	C36	1.27865	0.702829	0.051515	0.162867	0.089547	0.799256	0.12772	2	201097	2	41402	3728
0	0	0	1.0486	0.50229	-0.0714906	0.021895	1.0486	1.6335	0.403807	2.0092	0.021895	0.043876	4700000000	3816000000		32249067	0	4740000000		2336000000	2381000000											0.01861	-0.231873	0.089239	-0.190514	0.207755	C38	1.6335	0.50229	0.053514	0.043589	0.550136	0.548802	0.293374	1	41600	2	2649	0
0	0	0	1.87286	0.457737	-0.0716851	0.049334	1.87286	1.60316	0.216085	1.84412	0.049334	0.094206	4600000000	3633000000		43518300	0	4605000000		2017000000	2070000000											-0.028494	0.919979	0.837424	1.02787	0.639718	C38	1.80139	0.449573	0.072384	0.090943	0.572949	0.660061	0.157574	2	40322	2	2758	0
0	0	0	2.18754	0.542715	-0.0700292	0.047726	2.18754	1.65932	0.274169	2.18682	0.047726	0.09342	5800000000	4659000000		64735391	0	5755000000		2547000000	2997000000											0.249681	1.55852	1.3827	0.950444	1.36069	C38	1.82929	0.520769	0.055994	0.089641	0.568472	0.669964	0.149217	2	37527	2	6054	0
0	0	0	1.03506	0.580492	-0.0681328	0.047431	1.03506	1.81486	0.362601	2.38374	0.047431	0.106274	7100000000	5863000000		75358261	0	7072000000		3230000000	4105000000											0.228813	1.93266	1.6656	1.18718	1.04982	C38	1.81486	0.580492	0.0553	0.102536	0.610468	0.616876	0.163801	2	33296	2	6020	0
0	0	0	1.34637	0.539772	-0.0683432	0.081379	1.34637	1.87785	0.176987	2.17284	0.081379	0.185096	6900000000	5723000000	0	45384249	0	6926000000	0	3047000000	3738000000											-0.020652	5.0637	4.27329	2.8418	0.958401	C38	1.87785	0.539772	0.095562	0.178687	0.508638	0.954695	0.152872	1	35512	2	5479	10
0	0	0	1.84402	0.539619	-0.0663768	0.101229	1.84402	1.87688	0.309779	2.17212	0.101229	0.219914	8300000000	7098000000	0	39427978	0	8291000000	0	3782000000	4474000000											0.197146	0.870971	0.828829	1.111	0.826604	C38	1.87688	0.539619	0.099438	0.201776	0.515358	0.862947	0.131174	2	27402	2	5169
1	0	0	1.89665	0.422345	-0.0627746	0.133447	1.89665	2.45626	0.189476	1.73114	0.135121	0.256541	11000000000	9485000000	0	76947989	0	10790000000	0	3862000000	4558000000											0.039033	0.742761	0.72636	0.64692	0.90235	C38	2.45627	0.422345	0.123836	0.206807	0.749068	0.774559	0.076106	2	85814	2	5990
1	0	0	1.56893	0.449712	-0.0603334	0.069233	1.56893	2.21946	0.164847	1.81723	0.069233	0.122978	12000000000	10910000000	0	104100000	128800000	12490000000	0	4914000000	5616000000											0.157071	5.8947	5.48046	6.2962	2.14073	C38	2.21946	0.449712	0.068089	0.117274	1.02669	0.5883	0.133312	2	70448	3	5919	0
1	0	0	1.27972	0.472021	-0.0577216	0.070217	1.27972	2.0417	0.281926	1.89402	0.070217	0.130422	14000000000	12330000000		223000000	266400000	14300000000		6039000000	6750000000	9607000000	9607000000	8643000000	7371000000	447600000	616000000	45356556	1085000000	144800000	940500000	0.145227	3.51792	3.63366	3.8481	1.51432	C38	2.0417	0.472021	0.068936	0.124559	0.811596	0.67178	0.133425	2	51372	3	5890	0
1	0	0	0.868775	0.469273	-0.0562701	0.046052	0.868775	1.83447	0.171821	1.88421	0.046052	0.086989	15000000000	13140000000		392800000	245100000	15310000000		7161000000	7184000000	10330000000	10330000000	9621000000	8200000000	360300000	693500000	43909162	792700000	110900000	681800000	0.070477	1.44239	1.21035	1.23422	1.52138	C38	1.83447	0.469273	0.047404	0.083915	0.883144	0.674826	0.139955	2	63493	3	5662	0
0	0	0	0.942654	0.504574	-0.059974	0.048041	0.942654	1.29878	0.575054	2.01847	0.048041	0.112626	13000000000	4531000000		384500000	0	12740000000		3488000000	6427000000											0.551331	-0.442962	-0.380288	-0.731823	-0.061475	C30	1.29878	0.504574	0.060655	0.0827	0.027987	0.358702	0.109424	2	52036	2	8052	611
0	0	0	1.08276	0.535426	-0.0471848	0.061968	1.08276	1.20445	0.350632	2.15251	0.061968	0.151809	22000000000	6422000000		738200000	0	21620000000		6616000000	13900000000											0.697228	-0.424026	-0.439179	-0.557646	-0.088147	C30	0.970584	0.643191	0.061815	0.138001	0.053613	0.320934	0.168692		32054		12840	665
0	0	0	0.947292	0.692911	-0.034749	0.060479	0.947292	0.862248	0.328711	3.25638	0.060479	0.184492	30000000000	7811000000		1132000000	0	30250000000		9059000000	20960000000											0.395909	-0.450007	-0.413953	-0.509325	-0.107454	C30	0.862248	0.692911	0.069725	0.168834	0.051957	0.365727	0.211641		37440		15794	919
0	0	0	0.530972	0.565081	-0.0234829	0.046296	0.530972	1.08853	0.209485	2.29928	0.046296	0.140913	38000000000	9247000000		1833000000	0	38080000000		14330000000	24920000000											0.258589	-0.914483	-0.862073	-1.06983	-0.244664	C30	0.645423	0.654412	0.064988	0.120201	0.039147	0.413081	0.252569		59655		17390	941
0	0	0	0.448048	0.677956	-0.0185448	0.003468	0.448048	0.735718	0.236086	3.10517	0.003468	0.010404	42000000000	10020000000	0	2100000000	0	41500000000	0	13610000000	28140000000											0.090054	-1.59295	-1.26783	-3.82304	-0.255342	C30	0.735718	0.677956	0.032612	0.010323	0.064293	0.352094	0.393005	2	58253	2	18066	1135
0	0	0	0.265163	0.677456	-0.0162547	0.004698	0.265163	0.687723	0.175466	3.10035	0.004698	0.014577	43000000000	9820000000	0	2538000000	0	43090000000	0	14280000000	29190000000											0.038314	-0.631378	-0.354575	-0.881941	-0.163911	C30	0.687723	0.677456	0.037412	0.014297	0.07407	0.364567	0.552813	2	62786	2	18064	590
1	0	0	0.399782	0.694987	-0.0148721	-0.006368	0.399782	0.526451	0.138669	3.27855	-0.006368	-0.020301	44000000000	10410000000	0	2845000000	0	44050000000	0	19770000000	30620000000											0.022278	-1.61275	-1.1594	-5.29113	-0.252916	C30	0.526451	0.694987	0.028198	-0.02065	0.107541	0.355578	-0.548822	2	44696	2	19061	1003
1	0	0	0.355803	0.725467	-0.0188657	-0.050397	0.355803	0.425869	0.085098	3.64256	-0.050397	-0.173624	41000000000	8761000000	0	2879000000	0	41280000000	0	20570000000	29950000000											-0.062946	0.466932	-0.285946	-0.251843	-0.241204	C30	0.425869	0.725467	-0.01735	-0.189741	0.14062	0.269087	-0.238923	2	67566	3	16477	1194
1	0	0	0.386584	0.730765	-0.0185794	-0.000572	0.386584	0.515765	0.121495	3.71423	-0.000572	-0.002102	41000000000	10670000000		2884000000		41480000000		20700000000	30310000000	12340000000	12340000000	13200000000	9353000000	454800000	1674000000	1250000000	198800000	222500000	-23653371	-0.000636	0.03307	0.171402	-0.494688	-0.146015	C30	0.515765	0.730765	0.029568	-0.002118	0.112311	0.297376	1.11895	2	44662	3	14536	2258
0	0	0	0.68665	0.461092	-0.0387146	0.050228	0.68665	3.04976	1.05657	1.85561	0.050228	0.10534	27000000000	21070000000		700300000	0	27500000000		6908000000	12680000000											0.760072	1.67367	1.38926	1.40982	0.478677	K70	3.04976	0.461092	0.038597	0.070101	0.107847	0.203466	0.266923	2	140391	2	734	0
0	0	0	0.710608	0.623564	-0.0173207	0.039341	0.710608	2.70322	1.06811	2.65649	0.039341	0.089332	42000000000	33380000000		684200000	0	42350000000		12350000000	26410000000											0.540216	0.93923	0.970091	0.968065	1.55237	K70	2.70322	0.623564	0.039299	0.086182	0.086599	0.147128	0.283398	2	243464	2	883
0	0	0	0.369387	0.681675	-0.0003066	0.037994	0.369387	2.14163	0.665075	3.14145	0.037994	0.110503	54000000000	44780000000		594000000	0	54170000000		20910000000	36930000000											0.278936	6.62431	5.66537	5.26943	2.80712	K70	2.14163	0.681675	0.038577	0.106339	0.038109	0.149725	0.275419		261721		1781
0	0	0	0.306651	0.690309	0.007692	0.036134	0.306651	1.54141	0.306845	3.22903	0.036134	0.115151	60000000000	46390000000		697300000	0	59720000000		30090000000	41230000000											0.102532	-0.566848	-0.477961	-0.484929	-0.13142	K70	1.54141	0.690309	0.038898	0.111252	0.021852	0.161369	0.284789	2	211029	3	2492
0	0	0	0.291771	0.699479	0.0225374	0.041564	0.291771	1.76538	0.370554	3.32756	0.041564	0.136392	70000000000	54220000000	0	810100000	0	70030000000	0	30710000000	48980000000											0.172603	2.3879	2.28636	2.24809	1.25708	K70	1.76538	0.699479	0.043925	0.128129	0.014001	0.246091	0.263941	2	191128	3	2621
0	0	0	0.208118	0.678514	0.0312363	0.048186	0.208118	2.21027	0.358305	3.11055	0.048186	0.154723	76000000000	60290000000	0	817100000	0	76070000000	0	27280000000	51610000000											0.086252	1.8826	2.13827	2.21574	1.63693	K70	2.21027	0.678514	0.049101	0.143935	0.019525	0.26137	0.253294	2	178313	3	2489	0
1	0	0	0.420762	0.693987	0.0478224	0.038037	0.420762	2.05963	0.242688	3.26784	0.038037	0.121445	88000000000	68420000000	0	808900000	0	87590000000	0	33220000000	60780000000											0.151397	7.92218	7.70571	8.4277	1.42786	K70	2.05963	0.693987	0.042923	0.116127	0.076238	0.251587	0.262279	2	120678	2	2541	0
1	0	0	0.326105	0.72555	0.0738771	0.02344	0.326105	3.10096	0.26475	3.64365	0.02344	0.081175	110000000000	82730000000	0	791400000	0	105700000000	0	26680000000	76680000000											0.206551	5.96851	6.24192	5.9923	2.16024	K70	3.10096	0.72555	0.030027	0.078096	0.053197	0.147284	0.293902	2	155864	2	2732	0
1	0	0	0.272839	0.724098	0.0841842	0.02577	0.272839	2.60995	0.422772	3.62448	0.02577	0.093642	110000000000	82350000000		615000000		112800000000		31550000000	81700000000	19850000000	19850000000	17840000000	13890000000	872600000	612900000	879500000	4215000000	1399000000	2816000000	0.067723	87.5784	69.9742	64.0766	3.955	K70	2.60995	0.724098	0.032748	0.090442	0.048377	0.175942	0.33202	2	99365	2	3430	0
1	0	0	0.265199	0.730814	0.102013	0.034469	0.265199	2.63616	0.331593	3.7149	0.034469	0.126552	130000000000	83890000000		599600000		125200000000		31820000000	91510000000	25520000000	25520000000	22190000000	18010000000	722500000	550000000	1001000000	5600000000	1497000000	4103000000	0.109718	4.07184	4.33672	4.28877	0.623077	K70	2.63616	0.730814	0.040759	0.121719	0.012976	0.203803	0.267387	2	83864	2	3415	174
0	0	0	3.6094	0.703759	-0.0766074	0.056765	3.6094	0.460859	0.02552	3.37563	0.056765	0.200215	1200000000	289500000	0	103700000	0	1187000000	0	628100000	835500000											0.111625	-1.55394	-1.35246	-2.12661	-0.224076	C27	0.460859	0.703759	0.113366	0.181996	0.00265	0.402403	0.277912	2	21366	3	798	495
1	0	0	4.06421	0.615809	-0.0765978	0.089823	4.06421	0.567829	0.071294	2.60287	0.089823	0.263921	1200000000	347800000	0	68948474	0	1194000000	0	612500000	735200000											0.005601	-1.44232	-0.311307	0.112347	0.325546	C27	0.567829	0.615809	0.12063	0.233145	0.004034	0.41003	0.276709	2	18977	3	742	528
1	0	0	6.32053	0.584694	-0.0764948	0.054361	6.32053	0.609959	0.077315	2.40787	0.054361	0.135834	1300000000	407100000	0	73125895	0	1265000000	0	667500000	739800000											0.059895	-0.577563	-0.40838	-1.71962	-0.024072	C27	0.609959	0.584694	0.077402	0.127196	0.002839	0.395373	0.275519	2	17215	3	706	566
1	0	0	6.98914	0.588208	-0.0764742	0.03214	6.98914	0.905741	0.293416	2.43174	0.03214	0.077772	1300000000	626000000		71889859		1280000000		691100000	752700000	561200000	561200000	513600000	246300000	49545180	170700000	30825563	64468881	23572714	40896167	0.011291	-1.78397	-1.42878	-2.10006	-0.02674	C27	0.905741	0.588208	0.05605	0.077719	0.085118	0.438587	0.365645	2	17884	3	651	553
1	0	0	6.1365	0.589444	-0.0764152	0.011726	6.1365	0.98418	0.165455	2.43572	0.011726	0.028538	1300000000	689200000		69810669		1321000000		700300000	778400000	685400000	685400000	607200000	294800000	78151472	189400000	27880678	44424579	29179927	15244652	0.032029	4.82111	-6.16715	-1.22726	-0.113592	C27	0.98418	0.589444	0.032656	0.028118	0.146173	0.518998	0.656842	2	13206	2	1111	616
0	0	0	0.519946	0.610499	-0.0753233	0.0326	0.519946	0.635586	0.118982	2.56739	0.0326	0.112988	2100000000	1286000000		43151567	0	2079000000		1251000000	1401000000											-0.137332	-0.433374	-1.42343	355.439	-0.312952	C34	1.02816	0.673729	0.065757	0.107869	0.117062	1.4814	0.18513	2	40780	3	4871	69
0	0	0	1.01871	0.653219	-0.0744351	0.071779	1.01871	0.744355	0.145881	2.88366	0.071779	0.225624	2700000000	1878000000		43636073	0	2696000000		1730000000	1855000000											0.296679	-0.290926	-0.238288	-0.200541	-0.387457	C34	1.08578	0.688138	0.072109	0.203833	0.151674	1.20783	0.142648	2	37738	3	5792	53
0	0	0	0.821354	0.788164	-0.0731438	0.02453	0.821354	0.821326	0.040204	4.72064	0.02453	0.089158	3600000000	2394000000		151600000	0	3592000000		2578000000	2703000000											0.215531	-1.40034	-1.36394	-1.60139	-0.149443	C34	0.928451	0.752424	0.038044	0.086717	0.126954	1.2853	0.200213	1	40682	3	6173	27
0	0	0	0.343317	0.820763	-0.0722445	0.018442	0.343317	0.865556	0.12534	5.57919	0.018442	0.078604	4200000000	3056000000		111300000	0	4217000000		3199000000	3274000000											0.173834	0.587385	-0.437531	-0.223316	-0.208976	C34	0.955315	0.776426	0.032536	0.076378	0.138079	1.27305	0.144974		34967		6343	24
0	0	0	0.400139	0.763796	-0.0715064	0.038719	0.400139	0.980091	0.155416	4.23362	0.038719	0.168161	4700000000	3496000000	0	152900000	0	4729000000	0	3567000000	3612000000											0.121546	-0.292501	-0.374367	-0.433962	-0.40171	C34	0.980091	0.763796	0.046775	0.15504	0.15369	1.18446	0.102576	1	39027	3	5983	0
0	0	0	0.540685	0.609224	-0.0691499	0.045731	0.540685	1.25646	0.273067	2.55901	0.045731	0.140759	6400000000	4817000000	0	153100000	0	6365000000	0	3834000000	3878000000											0.346004	-0.395833	-0.458548	-0.856705	-0.31151	C34	1.25646	0.609224	0.039869	0.101985	0.137548	1.05413	0.111454	2	36597	3	6122
1	0	0	0.684645	0.591573	-0.0688055	0.044652	0.684645	1.27749	0.296883	2.44842	0.044652	0.111696	6600000000	4856000000	0	151500000	0	6605000000	0	3801000000	3907000000											0.037565	-0.077404	-0.532264	-0.57593	-0.08499	C34	1.27749	0.591573	0.042909	0.107348	0.171485	1.06032	0.112724	2	45571	3	6679	898
1	0	0	0.750661	0.574696	-0.0682785	0.048857	0.750661	1.33128	0.224803	2.35126	0.048857	0.117136	7000000000	5191000000	0	163200000	0	6971000000	0	3899000000	4006000000											0.055411	-0.356692	-0.310226	-0.310128	0.099974	C34	1.33128	0.574696	0.032483	0.111859	0.199064	0.983596	0.148145	2	50455	2	6685	947
1	0	0	0.690681	0.598875	-0.0666482	0.052513	0.690681	1.32221	0.415403	2.49299	0.052513	0.127364	8100000000	6268000000		156900000		8102000000		4741000000	4852000000	6965000000	6965000000	6586000000	6010000000	157000000	488200000	-106600000	458600000	62859589	395800000	0.162397	0.219132	0.143772	0.029916	0.10318	C34	1.32221	0.598875	0.035687	0.12177	0.174469	0.859623	0.137061	2	32481	2	6447	1005
1	0	0	0.438738	0.602868	-0.0639469	0.023461	0.438738	1.29524	0.295408	2.51805	0.023461	0.058812	10000000000	7629000000		184500000	10206358	9978000000		5890000000	6016000000	8114000000	8114000000	7923000000	7156000000	177100000	529400000	18296734	247900000	35848187	212100000	0.231497	-1.59492	-1.72047	-1.35626	0.00083	C34	1.29524	0.602868	0.02309	0.053524	0.138854	0.813184	0.14458	2	42419	2	6441	1229
0	0	0	0.94394	0.550517	-0.0752965	0.133447	0.94394	1.03384	0.260292	2.22478	0.135819	0.354576	2100000000	1096000000		33216024	10875833	2097000000		1060000000	1155000000											-0.094088	0.381401	0.4726	0.838412	-0.332302	C29	1.03384	0.550517	0.166255	0.317858	0.062141	0.857889	0.259314	2	56278	3	1646	14
0	0	0	1.80975	0.52568	-0.0748476	0.106238	1.80975	1.07276	0.357624	2.10828	0.106238	0.229575	2400000000	1227000000		38343570	18473083	2409000000		1144000000	1266000000											0.148919	-0.016295	-0.118522	-0.120877	0.047115	C29	1.07276	0.52568	0.114633	0.20949	0.169814	0.606015	0.125219	2	77266	2	1749	14
0	0	0	1.30033	0.548944	-0.0738313	0.12146	1.30033	0.8539	0.106782	2.21702	0.12146	0.258165	3100000000	1333000000		164900000	24369056	3115000000		1596000000	1659000000											0.292915	537.913	127.634	226.629	1.18683	C29	0.835385	0.5325	0.127505	0.230377	0.115355	0.691073	-0.06211		74168		1653	14
0	0	0	0.791354	0.567141	-0.0738037	0.001993	0.791354	0.801774	0.113128	2.31022	0.001993	0.004356	3100000000	1413000000		158300000	35071975	3134000000		1713000000	1731000000											0.006166	-1.27874	-1.01849	2.63279	-0.067858	C29	0.824444	0.552447	0.032117	0.004439	0.115607	0.730302	-1.37577		73212		1551	28
0	0	0	1.3311	0.585817	-0.0737443	-0.044176	1.3311	0.904426	0.253736	2.41439	-0.044176	-0.102554	3200000000	1667000000	0	186800000	15506963	3175000000	0	1843000000	1860000000											0.013161	3.23314	3.22319	3.24495	0.02472	C26	0.904426	0.585817	-0.013019	-0.105966	0.146356	0.688668	0.146107	2	54716	3	1552	0
0	0	0	1.0154	0.615876	-0.0732894	0.015261	1.0154	0.864199	0.196392	2.60332	0.015261	0.038302	3500000000	1607000000	0	187800000	27644826	3491000000	0	1859000000	2150000000											0.099477	-1.62696	-1.64325	-1.66151	-0.118775	C26	0.864199	0.615876	0.041521	0.037932	0.140535	0.639581	-0.113582	2	60856	3	1588	0
1	0	0	1.16028	0.506253	-0.0724084	0.013956	1.16028	1.10151	0.282205	2.02533	0.013956	0.031478	4100000000	1874000000	0	187100000	0	4103000000	0	1702000000	2077000000											0.154223	-0.791923	-1.20604	-0.767693	0.114594	C26	1.10151	0.506253	0.031903	0.026158	0.110447	0.700085	-0.233299	2	52460	3	1466	0
1	0	0	1.54935	0.494332	-0.072338	0.010047	1.54935	0.94427	0.312235	1.97758	0.010047	0.020105	4200000000	1626000000	0	193100000	0	4152000000	0	1722000000	2052000000											0.011905	2.53592	0.158372	0.303588	-0.073224	C26	0.94427	0.494332	0.026599	0.019752	0.118418	0.604434	-0.540227	2	61905	3	1535	0
1	0	0	1.8839	0.41451	-0.0721207	-0.050439	1.8839	1.12267	0.347583	1.70797	-0.07693	-0.140823	4300000000	1572000000		96816754		4303000000		1400000000	1783000000	2650000000	2650000000	2995000000	2306000000	159000000	145300000	46761080	-251400000	73796064	-325200000	0.03635	-131.7	-45.3471	-51.3367	0.556288	D45	1.12267	0.41451	-0.064713	-0.12909	0.106128	0.615865	-0.293546	2	58186	2	1609	0
1	0	0	1.34147	0.465132	-0.0710513	0.026253	1.34147	0.864609	0.262796	1.86962	0.026253	0.047035	5000000000	1743000000		107300000		5045000000		2016000000	2347000000	3828000000	3828000000	3707000000	3261000000	165900000	141100000	53322060	161000000	38252033	122700000	0.172582	-1.16817	-1.20781	-1.46419	0.554125	D45	0.864609	0.465132	0.03489	0.045471	0.081587	0.758747	0.237656	2	45589	2	1481	0
0	0	0	1.44159	0.479958	-0.0773063	-0.050439	1.44159	1.25506	0.001149	1.92292	-0.128265	-0.343863	700000000	459700000		4.9119e+06	0	701800000		428000000	428000000											-0.332439	17.9041	51.9351	50.5472	-0.293165	C30	1.07416	0.609795	-0.119081	-0.410559	0.086147	1.28638	0.033728		13381		3510	1400
0	0	0	4.37454	0.482789	-0.077577	-0.050439	4.37454	1.22274	0.000714	1.93345	-0.26642	-0.79415	510000000	373800000		4790537	0	513900000		379900000	379900000											-0.267778	-17.142	-14.3872	-15.2685	-0.778318	C30	0.983866	0.739263	-0.294104	-1.20864	0.415166	0.276753	-0.075957		13381		3458	1400
0	0	0	6.73985	0.473897	-0.077682	0.06808	6.73985	1.51441	0.000615	1.90077	0.06808	0.217704	440000000	348500000		17713882	0	441000000		264200000	276400000											-0.141877	-0.08497	-0.08497	0.193185	5.76681	C30	1.31914	0.62671	0.079778	0.197454	0.02106	0.505961	0		26087		1824	1400
0	0	0	4.03917	0.600549	-0.0777008	0.013066	4.03917	1.27043	0.007088	2.50344	0.013066	0.033834	430000000	318800000		8967700	0	427900000		251000000	257000000											-0.029706	-2.32784	-1.93061	1.74881	-0.72475	C32	1.27043	0.600549	0.014554	0.03321	0.015188	0.511672	0.204225	1	34588	3	95	0
0	0	0	4.34641	0.607177	-0.0776675	0.011013	4.34641	1.25489	0.022486	2.54568	0.011013	0.027808	450000000	336100000	0	8871700	0	451000000	0	267900000	273900000											0.054126	-41.5191	-32.2798	85.228	0.095331	F51	1.25489	0.607177	-0.002501	0.027317	0.569561	0.073727	0.163587	1	33623	3	96
0	0	0	2.61151	0.664357	-0.0774864	0.031936	2.61151	1.29378	0.006961	2.97936	0.031936	0.088529	580000000	464600000	0	8775700	0	576800000	0	359100000	383200000											0.27877	-18.9523	-18.9975	38.5139	-0.221371	F51	1.29378	0.664357	0.029382	0.084777	0.128853	0.333943	0.003794	1	24672	3	103
1	0	0	5.8425	0.69855	-0.0776597	-0.050439	5.8425	1.3529	0.000788	3.3173	-0.107281	-0.334692	460000000	375200000	0	6607700	0	456500000	0	277400000	318900000											-0.208606	-0.61887	-0.613344	0.087919	-1.70003	F51	1.3529	0.69855	-0.113818	-0.402788	1.98841	0.1241	-0.000587	2	31174	3	46
1	0	0	10.7849	0.833984	-0.077649	-0.050439	10.7849	1.06585	0.003095	6.02352	-0.131652	-0.564581	460000000	368100000	0	6607700	0	463900000	0	345400000	386900000											0.016322	24.1129	24.1129	35.9508	-1	F51	1.06585	0.833984	-0.12883	-0.786639	0.719162	0.258468	0	1	31713	3	39	0
1	0	0	4.25667	0.186463	-0.0677165	0.133447	4.25667	2.99849	1.43662	1.2292	0.234962	0.303119	7400000000	3248000000		335100000		7361000000		1083000000	1373000000	2603000000	2603000000	1531000000	737700000	372400000	133300000	64951504	1087000000	168200000	919200000	0.393106	0.117204	0.099165	0.108843	-0.28149	F51	2.99849	0.186463	0.133709	0.153509	0.066455	0.353618	0.154661	2	20865	2	1894	0
1	0	0	4.5567	0.156207	-0.0671636	0.133447	4.5567	3.13261	0.717203	1.18512	0.161128	0.194353	7700000000	3626000000		355100000		7745000000		1158000000	1210000000	3173000000	3173000000	1737000000	855100000	500800000	62076383	48838674	1443000000	225800000	1217000000	0.052156	0.495067	0.53437	0.596512	0.332432	C26	3.13261	0.156207	0.16344	0.186224	0.215157	0.409727	0.156482	2	28157	2	1776	4
0	0	0	7.53527	0.189893	-0.0782227	0.041455	7.53527	3.7577	0.071051	1.23441	0.041455	0.051205	65000000	46399803		2.99901e+06	0	65499650		12347929	12437929											0.036421	-7.44248	-7.44248	-1.72445		C35	3.7577	0.189893	0.017711	0.051965	1.182	0.233243	0	2	15028	3	12	0
0	0	0	28.5039	0.207246	-0.078242	-0.050439	12.9916	3.29679	1.87246	1.26143	-0.235223	-0.293143	52000000	35318578		0	0	52126610		10713012	10803012											-0.20417	3.62648	3.62648	4.31886	-0.11754	C35	3.29679	0.207246	-0.288424	-0.334778	0.003183	0.292289	0	2	11304	3	9	0
0	0	0	25.2791	0.250909	-0.0782476	-0.050439	12.9916	2.71835	1.73619	1.33495	-0.112726	-0.146061	48000000	32631108		0	0	48200667		12003990	12093990											-0.075316	1.12364	1.12364	1.12364		C35	2.71835	0.250909	-0.138008	-0.156613	0	0.393356	0		12018		9	0
0	0	0	17.5426	0.110442	-0.0782495	0.117903	12.9916	6.21112	0.148316	1.12415	0.117903	0.144073	47000000	31606942		0	0	46891250		5.08876e+06	5.17876e+06											-0.027166	1.42522	1.54506	-4.92288	0.271609	C35	6.21112	0.110442	0.085651	0.134392	0.098379	1.85526	0.046805		13256		21	0
0	0	0	2.09066	0.213988	-0.0765911	0.12942	2.09066	1.64777	0.878168	1.27225	0.12942	0.163841	1200000000	360300000	0	385800000	0	1198000000	0	218600000	256400000											-0.011229	-1255.44	-1198.31	-1199.39	11.963	F51	1.64777	0.213988	0.065206	0.085548	0.162855	0.249536	0.271454	2	13365	1	48	0
0	0	0	3.42911	0.383685	-0.075758	0.085583	3.42911	0.855001	0.40827	1.62255	0.085583	0.125	1800000000	436900000	0	535700000	0	1777000000	0	511000000	681800000											0.48271	0.867511	0.699875	0.685974	0.672364	B08	0.855001	0.383685	0.073835	0.116259	0.217871	0.230194	0.251359	2	14346	2	57	0
1	0	0	1.4544	0.617375	-0.0735473	-0.011588	1.4544	0.247449	0.129616	2.61352	-0.011588	-0.024961	3300000000	348400000	0	1309000000	0	3312000000	0	1408000000	2045000000											0.863875	2.91438	3.48295	4.26153	-0.406601	B08	0.247449	0.617375	-0.002226	-0.023266	0.155708	0.095909	-0.284556	2	21398	2	54	0
1	0	0	1.06759	0.727898	-0.070142	0.02745	1.06759	0.62523	0.093171	3.67509	0.02745	0.087747	5700000000	1963000000	0	1399000000	0	5676000000	0	3140000000	4132000000											0.713943	0.367288	0.783659	0.735898	1.85544	B08	0.62523	0.727898	0.03792	0.079869	0.105753	0.391015	0.409292	2	36734	2	2357	1
1	0	0	1.08296	0.78185	-0.0693906	-0.032305	1.08296	0.545536	0.036859	4.584	-0.032305	-0.132431	6200000000	2311000000		1391000000		6198000000		4237000000	4846000000	2217000000	2217000000	2418000000	1952000000	69060204	163200000	187200000	-177100000	14733097	-191800000	0.091919	-72.898	-7.53403	-8.35684	-0.845509	S90	0.545536	0.78185	-0.000743	-0.141855	0.171825	0.357745	-0.083202	2	36734	2	2140	2
1	0	0	0.448205	0.818473	-0.0697145	-0.044571	0.448205	0.543143	0.012918	5.50882	-0.044571	-0.222658	6000000000	2182000000		1245000000		5973000000		4017000000	4889000000	1430000000	1430000000	1755000000	1295000000	61410329	154000000	201800000	-275900000	-4.69632e+06	-271300000	-0.036288	1.66275	2.34134	1.53954	-0.963282	S90	0.543143	0.818473	-0.011631	-0.250157	0.302268	0.23944	0.017019	2	38004	2	1887	0
0	0	0	0.281848	0.851519	-0.0648828	0.005082	0.281848	0.915627	0.016407	6.73485	0.005082	0.030947	9300000000	7234000000		204800000	0	9328000000		7901000000	7943000000											0.165215	-1.20475	-6.97874	6.14439	0.141244	C34	0.915627	0.851519	0.022564	0.030553	0.186162	0.701671	0.304517	2	89751	3	12263	0
0	0	0	0.689429	0.866902	-0.0654186	0.005754	0.689429	1.02385	0.036611	7.51325	0.005754	0.037527	9000000000	6646000000		416700000	2.50972e+06	8956000000		6503000000	7538000000											-0.039883	1.22162	0.839115	0.240746	0.177142	C34	1.02195	0.841649	0.024835	0.037089	0.34579	0.66743	0.464829		81645		13459
0	0	0	0.629627	0.873185	-0.0632203	0.014356	0.629627	1.0146	0.04952	7.88552	0.014356	0.094044	10000000000	8021000000		494800000	19080769	10480000000		8022000000	8933000000											0.157158	-4.9532	-1.87154	-3.77474	-0.525539	C34	0.999987	0.852209	0.040015	0.090068	0.266988	0.767643	0.312316		80851		13830
0	0	0	0.303743	0.873971	-0.0605235	0.00964	0.303743	0.948334	0.10156	7.9347	0.00964	0.069288	12000000000	9657000000		466500000	50946489	12360000000		10400000000	10730000000											0.178636	-1.62367	-1.42838	-2.74689	-0.107753	C34	0.928901	0.868213	0.035418	0.067607	0.268023	0.777872	0.219973		75577		14893	7959
0	0	0	0.257305	0.875378	-0.0594187	0.002656	0.257305	0.917397	0.040985	8.02427	0.002656	0.020737	13000000000	10180000000	0	587600000	62333023	13120000000	0	11090000000	11490000000											0.06209	-1.08407	-1.61739	-1.47213	0.464351	C34	0.917397	0.875378	0.035733	0.020692	0.540965	0.593402	0.473598	2	72439	3	14380	7764
0	0	0	0.271635	0.833668	-0.0547379	0.002329	0.271635	0.987318	0.104587	6.01207	0.002329	0.01576	16000000000	13090000000	0	762800000	67705054	16370000000	0	13260000000	13650000000											0.247682	-5.60621	1.25577	-0.692552	0.517937	C34	0.987318	0.833668	0.031764	0.012612	0.761523	0.450695	0.508078	2	67040	2	14252	7942
1	0	0	0.47609	0.863882	-0.0493036	0.001209	0.47609	1.13875	0.058655	7.34655	0.001209	0.008081	20000000000	16830000000	0	920200000	102400000	20150000000	0	14780000000	17400000000											0.230473	10.9751	6.45655	64.2074	0.457545	C34	1.13875	0.863882	0.03553	0.008053	0.966302	0.387914	0.654431	2	85511	3	14022	8266
1	0	0	0.859237	0.89864	-0.0462165	-0.030157	0.859237	1.32017	0.055343	9.86578	-0.030157	-0.255871	22000000000	18600000000	0	1094000000	115300000	22290000000	0	14090000000	20030000000											0.1064	-0.180507	0.139699	0.189679	0.470203	C34	1.32017	0.89864	0.008162	-0.283219	1.23903	0.286407	0.149703	2	172664	3	13070	8217
1	0	0	0.412393	0.966771	-0.0426035	-0.050439	0.412393	1.10752	0.022362	30.0941	-0.061053	-0.9324	25000000000	20180000000		1086000000	134500000	24800000000		18220000000	23970000000	6244000000	6244000000	7771000000	4806000000	761100000	626600000	838100000	-1491000000	-53090155	-1437000000	0.112552	0.744958	0.657894	0.656164	0.670854	C34	1.10752	0.966771	-0.024168	-1.74441	1.26487	0.251782	0.035618	2	148871	3	12385	8253
1	0	0	0.348938	0.952312	-0.0474824	0.00469	0.348938	0.903782	0.120181	20.9698	0.00469	0.117453	21000000000	17080000000		705100000	149700000	21410000000		18900000000	20390000000	4189000000	4189000000	5554000000	3105000000	646900000	590800000	1014000000	53098240	-55255023	108400000	-0.13661	-4.11736	-3.68194	-3.32731	0.14188	C34	0.903782	0.952312	0.05241	0.106122	1.17202	0.195661	-1.04062	2	116271	2	11877	8330
0	0	0	0.565309	0.808319	-0.0761978	0.029216	0.565309	1.03513	0.218944	5.21701	0.029216	0.147374	1500000000	1226000000		20726114	0	1472000000		1185000000	1189000000											0.128196	-0.186772	-0.116173	-0.471908	0.113224	F52	1.03513	0.808319	0.055948	0.14376	0.158606	2.78544	0.26943	2	19644	2	578	0
0	0	0	0.809175	0.812174	-0.075655	0.038342	0.809175	1.04884	0.14504	5.32408	0.038342	0.202297	1800000000	1566000000		20958209	0	1848000000		1493000000	1501000000											0.256129	1.01729	0.87046	0.508768	0.124308	F52	1.04884	0.812174	0.053488	0.183325	0.152296	2.7467	0.278096	2	16679	2	628	0
0	0	0	0.871526	0.81415	-0.0747656	0.040537	0.871526	1.06678	0.14347	5.3807	0.040537	0.217126	2500000000	2124000000		21620289	0	2466000000		1991000000	2008000000											0.334094	0.534007	0.708211	0.254117	0.078205	F51	1.06679	0.81415	0.05505	0.190804	0.152656	2.69191	0.273573		14349		934	0
0	0	0	0.550336	0.750787	-0.0730187	0.124928	0.550336	1.19142	0.262418	4.01263	0.124928	0.55825	3700000000	3270000000		35186716	0	3679000000		2745000000	2762000000											0.49191	-0.466701	-0.248909	-0.474154	0.017574	F51	1.19142	0.750787	0.124381	0.418648	0.174255	2.31754	0.266543		23137		1570	0
0	0	0	0.425478	0.745088	-0.0723977	0.036896	0.425478	1.19675	0.178567	3.92293	0.036896	0.146286	4100000000	3648000000	0	75692664	0	4110000000	0	3048000000	3062000000											0.117193	0.077419	0.122113	-0.058012	-0.009851	F51	1.19675	0.745088	0.058838	0.13715	0.164599	2.5765	0.279386	2	17776	2	1658	0
0	0	0	0.459644	0.740446	-0.0714078	0.037894	0.459644	1.23086	0.163684	3.85276	0.037894	0.147212	4800000000	4307000000	0	75346795	0	4798000000	0	3499000000	3552000000											0.167243	0.1272	0.138403	-0.141374	0.0485	F51	1.23086	0.740446	0.055602	0.135538	0.176564	2.57822	0.290403	1	12249	3	1882	426
1	0	0	0.900591	0.752556	-0.0694961	0.027153	0.900591	1.19832	0.122403	4.04132	0.027153	0.10679	6100000000	5488000000	0	85047927	0	6125000000	0	4580000000	4609000000											0.175366	-0.051046	0.079131	-0.070079	-0.003689	F51	1.19832	0.752556	0.043975	0.101546	0.175042	2.52514	0.283517	2	13187	2	2002	2
1	0	0	0.656154	0.757153	-0.0682545	0.029267	0.656154	1.19757	0.123666	4.11782	0.029267	0.119462	7000000000	6276000000		85254094		6987000000		5241000000	5290000000	17260000000	17260000000	17000000000	16280000000	288300000	281100000	113900000	265700000	73870513	191900000	0.140763	0.310151	0.3086	0.185157	0.012759	F51	1.19758	0.757153	0.043762	0.113082	0.188152	2.46987	0.277971	2	10704	2	1981	1
1	0	0	0.454484	0.790254	-0.0652356	0.023826	0.454484	1.15888	0.203674	4.76767	0.023826	0.106302	9100000000	8179000000		115100000		9083000000		7058000000	7178000000	18910000000	18910000000	18640000000	17760000000	395500000	314700000	135800000	275800000	84367363	191500000	0.300015	0.159516	0.112709	0.216189	0.047605	F51	1.15888	0.790254	0.036032	0.100488	0.197495	2.08153	0.30588	2	8386	2	2432	0
0	0	0	3.1969	0.349361	-0.0777318	0.01165	3.1969	1.41333	0.133203	1.53695	0.01165	0.018653	410000000	247700000		12479947	0	406400000		135900000	141400000											-0.064605	1.50783	-0.485384	-0.613104	-0.414846	C39	1.82304	0.347825	0.003251	0.01848	0.49943	0.505003	0.043654	2	27532	3	660	78
0	0	0	8.12853	0.362231	-0.0777926	-0.050439	8.12853	1.74875	0.038652	1.56797	-0.085091	-0.13185	360000000	221100000		12152733	0	364200000		126400000	131900000											-0.103901	1.90353	1.90395	1.90701	-0.311442	C39	1.74875	0.362231	-0.087506	-0.141155	1.085	0.170357	-0.011819	2	31867	3	638	88
0	0	0	12.1757	0.363774	-0.0777772	0.011002	12.1757	1.79781	0.07495	1.57177	0.011002	0.017272	370000000	244900000		11825520	0	374900000		136200000	136400000											0.029424	-7.48556	-8.17204	-2.96775	-0.01162	C39	1.79781	0.363774	0.007669	0.017045	0.063575	0.209012	0.31616		26424		565	36
0	0	0	9.24773	0.305501	-0.0777783	0.032405	9.24773	2.26601	0.138784	1.43989	0.032405	0.048706	370000000	258700000		11498306	0	374100000		114200000	114300000											-0.002034	0.88364	1.17357	1.17582	0.167103	C39	2.26601	0.305501	0.02503	0.046708	0.117726	0.279129	0.181876	1	19788	3	588	32
0	0	0	1.89574	0.755861	-0.0753479	0.133447	1.89574	2.33631	0.153287	4.09602	0.197903	0.631655	2100000000	1688000000	0	58245679	0	2062000000	0	722600000	1558000000											4.51094	-0.217196	-0.166415	-0.295269	-0.077781	C39	2.33631	0.755861	0.11678	0.478854	0.736742	0.377811	0.262036	1	20743	2	1896	0
0	0	0	1.59188	0.349694	-0.0653082	0.073827	1.59188	8.14782	2.98766	1.53774	0.073827	0.128433	9000000000	6722000000	0	112800000	0	9033000000	0	825100000	3159000000											3.38131	0.53866	0.616652	0.597989	0.39564	C39	8.14782	0.349694	0.045676	0.069719	1.01222	0.103166	0.251815	2	16688	2	2531
1	0	0	1.1713	0.49437	-0.0368426	0.067489	1.1713	2.59455	1.787	1.97773	0.067489	0.132386	29000000000	17370000000	0	462300000	0	28800000000	0	6695000000	14240000000											0.557674	0.528242	0.410995	2.31126	1.72257	C39	2.59455	0.49437	0.058577	0.095631	0.224192	0.161473	0.145852	2	212702	2	5050	0
1	0	0	1.15751	0.507345	-0.0108799	0.034659	1.15751	3.809	2.74793	2.02982	0.034659	0.069652	47000000000	34710000000		578200000		46830000000		9111000000	23760000000	6901000000	6901000000	5726000000	4822000000	64047044	418900000	344100000	1525000000	214700000	1311000000	0.625992	0.667483	0.709591	0.731376	0.913302	C39	3.809	0.507345	0.035335	0.056808	0.239478	0.147381	0.140763	2	361573	2	4461	0
1	0	0	0.776996	0.526364	0.0191574	0.033864	0.776996	2.25016	1.2105	2.11133	0.033864	0.070343	68000000000	46530000000		976500000	15397705	67680000000		20680000000	35630000000	17340000000	17340000000	15470000000	13720000000	207900000	642100000	754300000	2281000000	342000000	1939000000	0.345931	0.956757	0.724566	0.90465	1.93358	C39	2.25016	0.526364	0.039791	0.060482	0.456417	0.256139	0.149953	2	376913	2	7931	0
0	0	0	1.16115	0.654681	-0.0767451	-0.050439	1.16115	0.914345	0.056428	2.89588	-0.078205	-0.201522	1100000000	579300000		69948255	0	1092000000		633600000	714600000											-0.080332	-5.11694	-4.8657	-4.81522	-0.132374	E48	0.914345	0.654681	-0.063463	-0.236352	0.581919	0.217196	-0.076164	2	44725	3	1285	73
0	0	0	2.32169	0.745751	-0.0766553	-0.050439	2.32169	0.898263	0.148122	3.93315	-0.076102	-0.254931	1200000000	658900000		68342244	0	1154000000		733500000	860500000											0.057156	-13.1362	-12.9454	-16.4644	-0.241103	E48	0.898263	0.745751	-0.057428	-0.291228	0.3923	0.220492	-0.011334	2	36557	3	1026	72
0	0	0	2.54926	0.782727	-0.0764711	0.00172	2.54926	0.913662	0.240466	4.6025	0.00172	0.007327	1300000000	825300000		67327685	0	1282000000		903300000	1003000000											0.110842	9.43092	16.3707	5.45588	-0.15524	E48	0.913662	0.782727	0.013524	0.007523	0.391141	0.24938	0.818508	2	24650	3	904	68
0	0	0	0.452628	0.541802	-0.0515079	0.036911	0.452628	2.61815	2.42485	2.18246	0.036911	0.083381	19000000000	5562000000		648252	0	18620000000		2125000000	10090000000											0.60646	0.280846	0.302205	0.302239	0.236856	L71	2.61815	0.541802	0.017168	0.043052	0.087274	0.057407	0.25537		23170		42	0
0	0	0	0.277942	0.680917	-0.0351086	0.02595	0.277942	0.51549	0.349047	3.13399	0.02595	0.069693	30000000000	2652000000	0	75084271	0	30000000000	0	5145000000	20430000000											0.102154	-0.493921	-0.452414	-0.54432	-0.467096	L71	0.51549	0.680917	0.029885	0.065894	0.078547	0.083054	0.242454	2	29106	2	179	0
0	0	0	0.17575	0.853207	0.0039523	0.030618	0.17575	0.552892	0.120388	6.81231	0.030618	0.148544	57000000000	9749000000	0	58594000	0	57130000000	0	17630000000	48740000000											0.193071	3.02297	2.4808	2.51697	4.55029	L71	0.552892	0.853207	0.039183	0.159064	0.092337	0.111623	0.177003	2	38751	2	503	0
1	0	0	0.358158	0.81397	0.0192112	0.018882	0.358158	0.659905	0.11785	5.37546	0.018882	0.112339	68000000000	13290000000	0	46971000	0	67720000000	0	20130000000	55120000000											0.185475	-0.140607	-0.044044	0.078449	0.056297	L71	0.659905	0.81397	0.032048	0.093557	0.090718	0.10118	0.158346	2	35345	2	482	0
1	0	0	0.24267	0.753311	0.111641	0.017916	0.24267	1.34169	0.811234	4.05369	0.017916	0.079237	130000000000	41790000000	0	648300000	0	131900000000	0	31150000000	99360000000											0.947719	0.021546	0.095325	0.105631	0.077577	L71	1.34169	0.753311	0.026185	0.054958	0.121487	0.073229	0.14682	2	107947	2	530	0
1	0	0	0.204122	0.825802	0.233666	0.016304	0.204122	0.982807	0.220325	5.74059	0.016304	0.080859	220000000000	44620000000		585000000		216600000000		45400000000	178900000000	24260000000	24260000000	21660000000	15370000000	122800000	1226000000	3920000000	3303000000	461700000	2841000000	0.642385	0.080792	0.122482	0.027721	0.215511	L71	0.982807	0.825802	0.03121	0.07529	0.061992	0.111976	0.13979	2	123524	2	640	0
1	0	0	0.118587	0.882109	0.354297	0.012209	0.15067	0.743597	0.188037	8.4824	0.012209	0.086291	300000000000	49350000000		465300000		300400000000		66360000000	265000000000	35930000000	35930000000	32220000000	21150000000	175900000	1977000000	7952000000	4062000000	905800000	3156000000	0.386657	-0.073693	-0.061235	-0.008592	-0.077874	L71	0.743597	0.882109	0.03698	0.089121	0.054099	0.119624	0.223006	2	104420	2	800	0
0	0	0	2.3459	0.194119	-0.0771122	-0.000351	2.3459	4.31168	1.27803	1.24088	-0.000351	-0.000431	840000000	700200000		326592	0	836600000		162400000	162400000											0.003633	-3.09139	-7.10014	0.405964	0.032255	C14	4.31168	0.194119	-0.009986	-0.000435	0.000966	0.75135	4.89811	2	49048	3	91	80
0	0	0	4.76752	0.241461	-0.0769064	0.085443	4.76752	4.29104	3.88418	1.31832	0.085443	0.109494	980000000	762100000		8.2568e+06	0	979500000		177600000	236500000											0.170807	15.7483	14.7165	14.842	0.230509	C14	4.29104	0.241461	0.070943	0.104425	0.000318	0.642315	0.249272	2	46482	3	81
0	0	0	3.8533	0.007376	-0.0768878	0.029854	3.8533	111.953	95.4113	1.00743	0.029854	0.039132	990000000	783100000		7.91646e+06	0	992400000		190200000	231000000											0.013198	0.662547	0.740653	0.745313	0.070121	F52	4.11675	0.232765	0.022296	0.038658	0.000779	0.713387	0.275711		39842		61
0	0	0	2.97507	0.121643	-0.0770246	0.055547	2.97507	7.40195	5.57807	1.13849	0.055547	0.06774	900000000	805900000		238636	0	897500000		108900000	109200000											-0.095703	-10.6487	-22.8918	-27.2842	-0.110379	F52	7.40195	0.121643	0.044187	0.066587	0.000471	0.764724	0.286822		37096		61
0	0	0	3.04749	0.118874	-0.0769321	0.081271	3.04749	8.8868	4.95268	1.13491	0.081271	0.092375	960000000	875100000	0	157048	0	961600000	0	98475022	114300000											0.071526	-17.4098	-20.0899	-20.6584	0.052789	F52	8.8868	0.118874	0.065172	0.089157	0.000182	0.505113	0.266927	1	36574	3	53
0	0	0	3.87816	0.119955	-0.07697	0.022239	3.87816	8.19868	4.77376	1.13631	0.022239	0.025255	940000000	852500000	0	91418	0	935300000	0	104000000	112200000											-0.027367	-1.5368	-1.53627	-1.53648	0.029613	F52	8.19868	0.119955	0.013253	0.025626	0.007273	0.515602	0.161523	1	34739	3	360
1	0	0	4.68486	0.049781	-0.0769698	0.106615	4.68486	16.3498	9.61923	1.05239	0.106615	0.116502	940000000	760600000	0	0	0	935500000	0	46521898	46569587											-0.096577	1.65983	2.2727	2.27557	-0.242442	F52	16.3498	0.049781	0.1013	0.112191	0.000924	0.4597	0.233485	2	30101	3	59
1	0	0	3.49224	0.37754	-0.0762706	0.019675	3.49224	2.11571	0.274356	1.60653	0.019675	0.026144	1400000000	1131000000	0	1.71033e+06	0	1421000000	0	534500000	536500000											0.370204	-1.92063	-2.01921	-2.01867	0.529441	J69	2.11571	0.37754	0.02002	0.026209	0.036029	0.130525	0.364111	1	47561	3	335
1	0	0	6.39364	0.019555	-0.0769908	0.015909	6.39364	40.8447	6.56804	1.01995	0.015909	0.020845	920000000	735500000		451955		920900000		18007641	18007641	329400000	282200000	358700000	158039	252700000	81079976	12406441	27831459	9.20272e+06	18628738	-0.351929	-0.477933	-0.310088	-0.304281	-0.362602	J69	40.8447	0.019555	0.033701	0.020633	0.008904	0.306467	0.330659	1	33872	3	473	0
1	0	0	4.0168	0.042377	-0.0769593	0.031939	4.0168	17.2055	2.00466	1.04425	0.031939	0.032964	940000000	678300000		401738		942800000		39424221	39951742	71418431	10208897	47507164	63308.2	13674146	32443343	278994	41284072	11522544	29761528	0.023767	-0.936464	-0.814246	-0.824187	1.63538	J69	17.2055	0.042377	0.031864	0.032965	0.73763	0.010829	0.279104	2	33733	3	63	0
0	0	0	0.949952	0.457277	-0.0735059	0.064798	0.949952	1.11127	0.46197	1.84256	0.064798	0.172081	3300000000	2021000000		196700000		3341000000		2130000000	2154000000											0.342073	0.483478	0.280406	0.156969	0.195248	F52	0.949167	0.644616	0.063466	0.159095	0.003587	1.50976	0.218947	2	32472	2	6886	0
0	0	0	1.90521	0.464379	-0.0729974	0.082082	1.90521	1.14154	0.381356	1.86699	0.082082	0.23131	3700000000	2350000000		217200000	0	3694000000		2347000000	2385000000											0.105692	0.411918	0.358467	0.243975	0.228685	F52	1.00106	0.645623	0.082212	0.220552	0.003604	1.5933	0.273854	2	19034	2	6945	0
0	0	0	2.08038	0.470918	-0.0718745	0.089902	2.08038	1.12601	0.484605	1.89007	0.089902	0.248069	4500000000	3061000000		283900000	0	4474000000		2776000000	2823000000											0.211078	0.179863	0.252055	0.25303	0.222239	F52	1.10292	0.630959	0.084151	0.222381	0.003241	1.57855	0.233603	2	15683	2	7762	0
0	0	0	1.19037	0.321035	-0.069429	0.109805	1.19037	1.7609	0.982889	1.47283	0.109805	0.269828	6200000000	4650000000		385500000	0	6172000000		3356000000	3491000000											0.379584	0.14235	0.16615	0.023929	0.046579	F52	1.38555	0.565579	0.093109	0.217989	0.001844	1.38562	0.252116		17458		7960	0
0	0	0	0.817981	0.539711	-0.0687192	0.071546	0.817981	1.34481	0.987642	2.17255	0.071546	0.159753	6700000000	4616000000	0	374400000	0	6664000000	0	3433000000	3597000000											0.079855	-0.199811	-0.073498	-0.178157	0.206399	F52	1.34481	0.539711	0.06524	0.149689	0.002029	1.36628	0.278961	2	30826	2	8396	0
0	0	0	0.650448	0.540901	-0.0674904	0.066883	0.650448	1.26963	0.841775	2.17818	0.066883	0.145505	7500000000	4875000000	0	818900000	0	7518000000	0	3839000000	4066000000											0.128032	-0.287191	-0.200352	-0.258618	0.145388	F52	1.26963	0.540901	0.059067	0.137415	0.002645	1.31822	0.261774	2	41884	2	8101	0
1	0	0	0.813266	0.532677	-0.0668682	0.057688	0.813266	1.20763	0.724071	2.13985	0.057688	0.124509	7900000000	4841000000	0	930500000	0	7950000000	0	4008000000	4235000000											0.057466	0.785456	0.862899	0.792751	0.239287	F52	1.20763	0.532677	0.050889	0.12009	0.004224	1.25441	0.287989	2	29235	2	8213	0
1	0	0	1.02763	0.530825	-0.0663711	0.04094	1.02763	1.0704	0.545433	2.1314	0.04094	0.087428	8300000000	4456000000	0	994300000	0	8295000000	0	4163000000	4403000000											0.043424	0.44958	0.561442	0.567295	0.206317	F52	1.0704	0.530825	0.036665	0.085443	0.004782	1.1772	0.313308	2	47783	2	8280	0
1	0	0	0.729538	0.551745	-0.0650308	0.04132	0.729538	1.11922	0.561855	2.23088	0.04132	0.090188	9200000000	5124000000		1020000000		9226000000		4578000000	5090000000	9736000000	9736000000	9267000000	7799000000	395400000	873800000	-868227	510500000	148500000	362000000	0.112193	-0.032142	0.039383	-0.019091	0.091633	F52	1.11922	0.551745	0.039142	0.087531	0.00608	1.05531	0.29089	2	40134	3	7980	0
1	0	0	0.623362	0.572341	-0.0637768	0.030631	0.623362	1.06343	0.578285	2.33831	0.030631	0.070014	10000000000	5580000000		1004000000		10100000000		5247000000	5779000000	10390000000	10390000000	10020000000	8294000000	445200000	943400000	13862045	437900000	142000000	295900000	0.094387	-1.19019	-0.982522	-0.926085	0.057698	F52	1.06343	0.572341	0.030683	0.068535	0.007303	1.02908	0.324261	2	31049	3	9248	0
0	0	0	0.605584	0.305375	-0.073508	0.007021	0.605584	1.74224	0.44578	1.43963	0.007021	0.014649	3300000000	2324000000		152400000	0	3339000000		1624000000	1643000000											-0.117645	-2.99142	-2.97687	-3.05063	-0.131501	C38	1.43061	0.492168	0.012546	0.014747	0.098456	1.2856	0.368731		46487		1153
0	0	0	1.67475	0.399716	-0.0727312	0.061429	1.67475	1.56218	0.467453	1.66588	0.061429	0.122805	3900000000	2881000000		141500000	0	3879000000		1949000000	1964000000											0.161514	0.187391	0.352658	-0.528407	0.435051	C38	1.47816	0.506345	0.057537	0.115785	0.199906	1.12804	0.201457		32102		970
0	0	0	1.4465	0.465199	-0.0667935	0.102648	1.4465	1.33767	0.494849	1.86986	0.102648	0.224766	8000000000	6243000000		240200000	0	8002000000		4463000000	4491000000											0.332635	2.16972	2.1979	2.44775	1.89234	C38	1.39879	0.561231	0.080431	0.173673	0.080864	1.40002	0.155115	2	22976	2	1423
0	0	0	0.561736	0.491764	-0.0651466	0.062818	0.561736	1.34324	0.403692	1.96759	0.062818	0.144081	9100000000	7294000000		316900000	0	9145000000		5153000000	5180000000											0.142923	-0.760914	-0.716219	-0.84535	-0.385144	C38	1.41559	0.566435	0.058779	0.135829	0.084678	1.20015	0.196619		31490		1073
0	0	0	0.658165	0.494206	-0.0662144	0.043175	0.658165	1.6103	0.312725	1.97709	0.043175	0.092224	8400000000	6659000000	0	308700000	0	8404000000	0	4135000000	4153000000											-0.081079	-0.399088	-0.338751	-0.484302	0.577393	C38	1.6103	0.494206	0.044716	0.089127	0.104669	0.82105	0.149775	2	33689	2	8747	454
0	0	0	0.636724	0.508342	-0.0650352	0.053869	0.636724	1.63022	0.333523	2.03393	0.053869	0.108085	9200000000	7616000000	0	219400000	0	9223000000	0	4672000000	4688000000											0.097436	-0.142373	-0.215957	-0.275989	0.011034	C38	1.63022	0.508342	0.054146	0.104703	0.08911	0.946374	0.134635	2	28907	2
1	0	0	0.675511	0.54779	-0.0619327	0.076782	0.675511	1.5757	0.243999	2.21136	0.076782	0.16341	11000000000	9795000000	0	202800000	0	11380000000	0	6216000000	6232000000											0.233587	-0.101045	-0.118539	-0.098672	0.079038	C38	1.5757	0.54779	0.068206	0.153717	0.07926	0.949672	0.153294	2	33520	2	8497	442
1	0	0	0.946126	0.582086	-0.057683	0.081941	0.946126	1.53679	0.336545	2.39284	0.081941	0.1892	14000000000	12750000000	0	197500000	0	14330000000	0	8298000000	8340000000											0.259375	-0.152557	-0.175869	-0.093672	0.002729	C38	1.53679	0.582086	0.065818	0.175881	0.068238	0.916523	0.140602	2	22046	2	7872	430
1	0	0	0.976971	0.631521	-0.0511183	0.080857	0.976971	1.45537	0.350382	2.71386	0.080857	0.207429	19000000000	17330000000	0	192300000	0	18890000000	0	11910000000	11930000000	16330000000	16330000000	14980000000	12110000000	2326000000	505300000	-154800000	1584000000	241700000	1343000000	0.318149	-0.303547	-0.323023	-0.319068	0.051201	C38	1.45538	0.631521	0.062901	0.192953	0.089725	0.864922	0.152517	2	18394	2	7686	428
1	0	0	1.73551	0.614859	-0.0475864	0.084944	1.73551	1.49313	0.108178	2.59645	0.084944	0.225127	21000000000	19560000000		187000000		21340000000		13100000000	13120000000	21380000000	21380000000	19710000000	15980000000	2873000000	728300000	-71808983	2065000000	356300000	1708000000	0.129855	-0.177793	-0.092665	-0.070264	-0.000272	C38	1.49313	0.614859	0.076698	0.20788	0.081213	1.00217	0.172556	2	16031	2	9890	424
0	0	0	0.559679	0.609326	-0.0749932	0.02296	0.559679	0.636894	0.30772	2.55968	0.02296	0.055947	2300000000	686700000		178900000	0	2308000000		1078000000	1406000000											0.203551	0.360983	0.556477	0.706684	0.09455	F52	0.636894	0.609326	0.03031	0.053802	0.003838	0.784456	0.256536		28918		2786	0
0	0	0	0.90144	0.748371	-0.0741953	0.020846	0.90144	0.755427	0.280829	3.97411	0.020846	0.063053	2900000000	938800000		372300000	0	2862000000		1881000000	2054000000											0.240058	1.66202	1.65107	2.33162	0.318126	F52	0.499021	0.717833	0.031129	0.066726	0.006086	0.839548	0.359743	2	30834	3	3817
0	0	0	1.16074	0.718966	-0.0737268	0.034212	1.16074	0.607218	0.307173	3.55829	0.034212	0.121504	3200000000	1183000000		307500000	0	3187000000		1948000000	2292000000											0.113663	1.42804	1.35961	1.03659	0.238145	F52	0.607218	0.718966	0.048432	0.115523	0.014553	1.02145	0.306761		29090		5094
0	0	0	0.690365	0.532363	-0.0731765	0.063879	0.690365	0.92181	0.521302	2.13841	0.063879	0.168274	3600000000	1618000000		299500000	0	3569000000		1755000000	1900000000											0.119883	3.56437	3.61138	3.62508	0.199939	F52	0.92181	0.532363	0.069858	0.129288	0.007309	1.04437	0.27163		30629		4607
0	0	0	0.655398	0.530868	-0.0729778	0.042702	0.655398	0.95755	0.383581	2.1316	0.042702	0.091166	3700000000	1858000000	0	290300000	0	3707000000	0	1940000000	1968000000											0.038637	0.341284	0.525869	0.506077	0.224471	F52	0.95755	0.530868	0.043053	0.089331	0.006534	1.04391	0.275949	2	33330	3	4784
0	0	0	0.782257	0.520257	-0.0728229	0.038631	0.782257	1.01425	0.4095	2.08445	0.038631	0.081412	3800000000	1984000000	0	280900000	0	3815000000	0	1957000000	1985000000											0.029011	0.308792	0.29605	0.671462	0.18698	F52	1.01425	0.520257	0.039126	0.079389	0.003401	1.11769	0.297074	1	37741	1	4247
1	0	0	0.97078	0.487812	-0.0728738	0.036305	0.97078	1.13176	0.45095	1.95241	0.036305	0.073212	3800000000	2019000000	0	271900000	0	3780000000	0	1784000000	1844000000											-0.009259	3.60732	2.56509	2.0781	0.175022	F52	1.13176	0.487812	0.034806	0.071214	0.002261	1.13644	0.298413	1	30345	3	4104	155
1	0	0	1.27303	0.487041	-0.0727826	0.029066	1.27303	1.12436	0.460148	1.94947	0.029066	0.056705	3800000000	2033000000	0	308800000	0	3843000000	0	1808000000	1872000000											0.016766	-0.437327	-0.291511	0.206276	0.061391	F52	1.12436	0.487041	0.026117	0.056196	0.002637	1.08371	0.306889	1	33332	3	4013	153
1	0	0	1.07826	0.475139	-0.0725887	0.029771	1.07826	1.08095	0.465732	1.90527	0.029771	0.057361	4000000000	1969000000		301700000		3978000000		1822000000	1890000000	3860000000	3774000000	3745000000	3020000000	268300000	420200000	-4.72595e+06	160100000	43667016	116400000	0.035024	0.929319	0.607913	0.300276	0.24545	F52	1.08095	0.475139	0.028079	0.055762	0.003414	0.948804	0.272781	1	32882	3	4175	152
1	0	0	0.793845	0.470669	-0.0723312	0.036268	0.793845	1.19064	0.443721	1.88918	0.036268	0.068801	4200000000	2244000000		289800000		4156000000		1885000000	1956000000	4045000000	3924000000	3901000000	3139000000	281500000	433100000	4.55032e+06	193000000	45459766	147500000	0.044958	0.826413	0.668607	0.721641	0.162658	F52	1.19064	0.470669	0.036582	0.067043	0.003201	0.943994	0.23559	1	28256	3	3860	148
0	0	0	0.360603	0.588252	-0.0749332	-0.050439	0.360603	0.503936	0.085773	2.42867	-0.149306	-0.325415	2300000000	574000000		68911665	0	2350000000		1139000000	1382000000											-0.130427	0.91597	1.44138	1.80401	-0.266607	C28	0.503936	0.588252	-0.133716	-0.38981	0.033711	0.75947	0.111961	2	93505	3	4396	18
0	0	0	0.781229	0.53734	-0.0743843	0.003903	0.781229	0.44129	0.08348	2.16142	0.003903	0.010125	2700000000	850900000		178500000	0	2731000000		1544000000	1740000000											0.132593	0.910464	1.07188	-0.471074	0.02545	C28	0.551007	0.63713	0.024015	0.010005	0.054129	0.675665	0.785345		82040		4330	1
0	0	0	1.09083	0.621567	-0.0741172	-0.030706	1.09083	0.546691	0.236207	2.64248	-0.030706	-0.091053	2900000000	1061000000		172500000	0	2916000000		1620000000	2003000000											0.06792	-1.15991	-1.32192	-1.1168	0.339079	C28	0.654772	0.686778	-0.004406	-0.094915	0.038778	0.800328	-0.14359		52657		4426	0
0	0	0	0.457257	0.801884	-0.0739448	-0.050439	0.457257	0.511853	0.155391	5.04756	-0.104086	-0.408963	3000000000	1058000000		213500000	0	3036000000		2067000000	2434000000											0.041038	0.076338	0.120581	0.132923	-0.10281	C28	0.511853	0.801884	-0.064415	-0.515024	0.046739	0.763236	0.147127		61277		4081	0
0	0	0	0.345311	0.825412	-0.0733477	0.002625	0.345311	0.665666	0.16335	5.72776	0.002625	0.014145	3500000000	1519000000	0	193500000	0	3451000000	0	2281000000	2848000000											0.12298	-3.86867	-3.60455	1.35684	-0.007064	C28	0.665666	0.825412	0.038887	0.014134	0.065242	0.449086	-6.60729	2	52143	3	3775	42
0	0	0	0.297982	0.957023	-0.0725584	-0.050439	0.297982	0.418364	0.147466	23.2683	-0.115604	-1.11221	4000000000	1235000000	0	290900000	0	3999000000	0	2951000000	3827000000											0.158835	2.3468	1.29834	1.29612	-0.176805	C28	0.418364	0.957023	-0.071867	-2.50558	0.070135	0.348867	-0.189761	2	47242	3	6724	35
1	0	0	1.11543	0.692103	-0.0735522	-0.000481	1.11543	0.574682	0.226289	3.24784	-0.000481	-0.00295	3300000000	1028000000	0	137900000	3.00855e+06	3309000000	0	1789000000	2290000000											-0.172563	2.8793	3.14122	3.43756	-0.000834	C28	0.574682	0.692103	0.031471	-0.001724	0.090127	0.313429	-1.80493	2	45286	3	3694	21
1	0	0	2.06858	0.632747	-0.0745004	0.000841	2.06858	0.6522	0.031178	2.72292	0.000841	0.002514	2700000000	1000000000	0	118000000	0	2650000000	0	1534000000	1677000000											-0.204676	1.48025	-0.091819	-0.649729	0.447272	C28	0.6522	0.632747	0.023914	0.002573	0.088333	0.39101	9.85737	2	48793	3	3754	11
1	0	0	1.66333	0.417175	-0.0716625	0.006366	1.66333	1.04295	0.391602	1.71578	0.006366	0.012625	4600000000	1828000000		115200000		4621000000		1753000000	1928000000	1395000000	1395000000	1379000000	1232000000	36228626	62801496	34773143	25203430	2.05909e+06	23144342	0.743574	-0.281451	-0.253099	-0.499672	-0.121759	C28	1.04295	0.417175	0.012534	0.008594	0.085198	0.301798	0.081699	2	59216	3	3985	3
1	0	0	0.998088	0.550183	-0.0694167	0.015818	0.998088	0.442085	0.048092	2.22313	0.015818	0.031216	6200000000	1417000000		228700000		6180000000		3205000000	3400000000	2198000000	2198000000	2116000000	1941000000	41410510	58337882	75069071	90985991	5564608	85421383	0.337487	-0.987159	-0.930214	-0.772398	-0.023256	C28	0.442085	0.550183	0.025969	0.030728	0.061328	0.355627	0.061159	2	66500	3	4664	3
0	0	0	0.40654	0.732008	-0.0740314	0.020672	0.40654	0.70884	0.060953	3.73145	0.020672	0.063532	3000000000	1391000000		258100000	0	2976000000		1561000000	1989000000											0.034102	-3.066	-2.46109	2.6385	-0.001521	O79	0.891224	0.66825	0.034014	0.061285	0.047169	0.591221	0.351567	2	55827	2	4029	0
0	0	0	0.855078	0.744647	-0.0744433	0.025995	0.855078	0.697067	0.096273	3.91615	0.025995	0.07489	2700000000	1478000000		159200000	0	2690000000		1355000000	1710000000											-0.096106	-0.69595	-0.355292	-6.81494	-0.261378	O79	1.09104	0.635898	0.038377	0.075191	0.055484	0.58195	0.279743		46244		3089
0	0	0	0.668393	0.698296	-0.0740281	0.014645	0.668393	0.642551	0.145538	3.3145	0.014645	0.040256	3000000000	1654000000		145300000	0	2978000000		1320000000	1895000000											0.107165	-2.79386	-3.70016	-1.17535	0.777116	O79	1.25314	0.636461	0.020971	0.038336	0.0387	0.585244	0.515598		40026		4231
0	0	0	0.516062	0.646859	-0.0741067	0.033369	0.516062	0.715139	0.192714	2.83173	0.033369	0.089909	2900000000	1742000000		128700000	0	2924000000		1386000000	1816000000											-0.018317	-3.48634	-3.4886	-0.052198	0.512554	O79	1.25641	0.621109	0.04114	0.088892	0.033321	0.525129	0.186834		36456		4343
0	0	0	0.628546	0.54628	-0.0745862	0.039964	0.628546	1.40045	0.358198	2.204	0.039964	0.096522	2600000000	1624000000	0	99901983	0	2591000000	0	1159000000	1415000000											-0.113888	0.564683	-1.12271	-0.0476	0.107803	S90	1.40045	0.54628	0.050116	0.093742	0.029901	0.679125	0.238763	1	35078	2	3661	948
0	0	0	0.652959	0.47894	-0.0748421	0.038788	0.652959	1.59471	0.352847	1.91917	0.038788	0.079778	2400000000	1478000000	0	87243331	0	2413000000	0	926600000	1156000000											-0.068575	-0.468865	-0.355591	0.247855	-0.513708	S90	1.59471	0.47894	0.042485	0.07718	0.033904	0.690327	0.270006	1	32057	2	3481	1046
1	0	0	1.07989	0.387614	-0.0749918	0.071172	1.07989	1.79692	0.520744	1.63296	0.071172	0.125809	2300000000	1291000000	0	56375445	0	2309000000	0	718300000	895000000											-0.043085	-29.9516	55.3171	-0.87267	0.54707	S90	1.79692	0.387614	0.075332	0.118838	0.118656	0.680643	0.288454	2	32700	2	3432	1175
1	0	0	0.826053	0.474536	-0.0686928	0.080177	0.826053	0.894007	0.25089	1.90308	0.080177	0.146367	6700000000	2697000000	0	123200000	0	6683000000	0	3017000000	3171000000											0.181108	3.0648	2.3573	-3.98146	0.510157	D45	0.894007	0.474536	0.060192	0.102652	0.045724	0.59617	0.203072	2	32049	2	6423	2118
1	0	0	0.722892	0.491874	-0.068175	0.042117	0.722892	0.936719	0.186161	1.96801	0.042117	0.081532	7000000000	3121000000		115500000		7042000000		3332000000	3464000000	3902000000	3888000000	3770000000	3105000000	377000000	186100000	27583753	386100000	97066240	289000000	0.053802	81.871	365.221	17.186	0.558944	D45	0.936719	0.491874	0.044958	0.080771	0.054483	0.552044	0.251406	2	29551	2	2914	1246
1	0	0	0.326175	0.686656	-0.0625904	0.027755	0.326175	0.780774	0.358768	3.19138	0.027755	0.07122	11000000000	5367000000		132500000		10920000000		6874000000	7498000000	3609000000	3609000000	3295000000	2718000000	363800000	157200000	27195032	323800000	74535129	249300000	0.550642	2.76722	2.50501	1.92766	0.166343	D45	0.780774	0.686656	0.025318	0.07285	0.107187	0.330521	0.230181	1	31260	2	2871	1290
0	1	0	0.3708	0.722692	-0.0620334	0.040593	0.3708	0.542864	0.067339	3.6061	0.040593	0.139027	11000000000	3153000000		671600000	0	11310000000		5808000000	8171000000											0.286564	-4.69924	-4.47271	-4.73177	-0.035145	C26	0.542864	0.722692	0.06064	0.130081	0.010572	0.630655	0.018473	2	65857	3	2339	0
0	1	0	0.856745	0.727806	-0.0588519	0.036089	0.856745	0.799568	0.222551	3.67385	0.036089	0.13146	14000000000	3818000000		865500000	0	13520000000		4775000000	9837000000											0.191788	-0.092539	-0.03418	0.2452	0.071974	C26	0.799568	0.727806	0.058683	0.12175	0.021354	0.648167	0.176608	2	25468	3	3098	0
0	1	0	0.545393	0.724969	-0.0513202	0.063687	0.545393	1.08919	0.219046	3.63595	0.063687	0.232568	19000000000	7220000000		520500000	0	18750000000		6629000000	13590000000											0.386935	0.297629	0.428766	1.03575	0.00924	C26	1.08919	0.724969	0.077829	0.199261	0.053743	0.615868	0.114139		66308		3275	0
0	1	0	0.357476	0.736392	-0.0397506	0.055628	0.357476	0.950287	0.279562	3.79351	0.055628	0.207324	27000000000	11130000000		549000000	0	26780000000		11710000000	19720000000											0.428552	-0.70021	-0.661497	-0.667107	-0.01474	C26	0.950287	0.736392	0.07036	0.179371	0.023821	0.663378	0.152585		69714		4680	0
0	1	0	0.336452	0.734845	-0.0356186	0.052242	0.336452	0.729915	0.106029	3.77138	0.052242	0.197571	30000000000	9202000000	0	635000000	0	29650000000	0	12610000000	21790000000											0.107139	0.522619	0.443781	0.409208	0.223647	C26	0.729915	0.734845	0.077607	0.187491	0.029518	0.652701	0.081954	2	69995	3	3567	0
0	1	0	0.159232	0.788887	-0.0274005	0.006167	0.159232	0.746206	0.152267	4.73681	0.006167	0.026159	35000000000	12400000000	0	707500000	0	35350000000	0	16620000000	27890000000											0.192468	-7.47982	-4.87366	19.8801	-0.029513	C26	0.746206	0.788887	0.036599	0.026856	0.039038	0.545327	0.371795	2	81687	3	15572	0
1	1	1	0.179936	0.79884	-0.0244918	0.002172	0.179936	0.640853	0.144265	4.97118	0.002172	0.010545	37000000000	12180000000	0	661600000	0	37370000000	0	19010000000	29860000000											0.057127	-2.84333	-11.2787	0.704271	-0.123955	C26	0.640853	0.79884	0.039704	0.010507	0.043483	0.486478	0.268944	2	63283	3	10036	0
1	1	1	0.174501	0.798186	-0.0207407	0.001404	0.174501	0.592574	0.136008	4.95507	0.001404	0.006969	40000000000	13300000000	0	671600000	0	39980000000	0	22440000000	31910000000											0.069692	0.89458	1.33845	-2.52451	-0.123912	C26	0.592574	0.798186	0.028282	0.006731	0.026352	0.458671	0.416525	2	59357	3	9742	454
1	1	1	0.17947	0.828879	-0.0210378	-0.035301	0.17947	0.554162	0.162875	5.84383	-0.035301	-0.189276	40000000000	12960000000		684900000		39770000000		23390000000	32970000000	15180000000	15180000000	16630000000	13380000000	1127000000	589800000	938300000	-1334000000	73311515	-1408000000	-0.005161	-116.866	-37.7397	-339.701	-0.48954	C26	0.554162	0.828879	-0.011801	-0.20683	0.034042	0.381715	-0.054941	2	47010	3	8395	430
1	1	1	0.112539	0.951838	-0.0314382	-0.050439	0.15067	0.319557	0.1	20.7633	-0.142338	-1.22938	33000000000	8171000000		644200000		32550000000		25570000000	30980000000	11960000000	11960000000	17050000000	11660000000	721700000	1553000000	1053000000	-5116000000	31737380	-5147000000	-0.181573	1.91169	1.94297	1.72112	-0.037232	C26	0.319557	0.951838	-0.125774	-3.28324	0.021444	0.36728	-0.006204	1	66249	3	9871	147
0	0	0	3.73488	0.234181	-0.0755906	0.133447	3.73488	2.67175	1.58624	1.30579	0.169219	0.218359	1900000000	1161000000		80855038	0	1893000000		434600000	443300000											0.178157	1.34679	1.07302	1.05789	0.256012	C27	2.67175	0.234181	0.150534	0.204258	0.065963	0.890542	0.132331	1	53142	3	2687	4
0	0	0	5.48738	0.210992	-0.0738285	0.133447	5.48738	3.98933	3.20522	1.26741	0.162503	0.208271	3100000000	2445000000		124900000	0	3117000000		612900000	657600000											0.646293	0.817544	0.662197	0.647961	0.181376	C27	3.98933	0.210992	0.125326	0.165531	0.059249	0.66708	0.140178	1	42535	3	4318	4
0	0	0	9.28936	0.193079	-0.0731358	0.133447	9.28936	3.36514	1.3901	1.23928	0.176967	0.225194	3600000000	2502000000		128000000	0	3598000000		718800000	780300000											0.14757	0.40797	0.416134	0.410513	0.289978	C27	3.48038	0.2169	0.15934	0.210877	0.052445	0.684818	0.152525		45574		5420	4
0	0	0	6.64645	0.177752	-0.0722305	0.133447	6.64645	4.78816	2.19312	1.21618	0.222457	0.276603	4200000000	3281000000		146300000	0	4226000000		685100000	751200000											0.17473	0.478563	0.419849	0.408412	0.536968	C27	4.78816	0.177752	0.200834	0.250427	0.020248	0.652773	0.160222		51080		5665	4
0	0	0	4.96258	0.190484	-0.0706473	0.133447	4.96258	4.47008	2.88146	1.2353	0.220595	0.270619	5300000000	4169000000	0	151700000	0	5326000000	0	932700000	1014000000											0.260108	0.105765	0.024807	0.03922	0.678458	C27	4.47007	0.190484	0.19379	0.244377	0.033924	0.57384	0.153491	2	55905	3	6227	4
0	0	0	4.3268	0.149746	-0.0697053	0.133447	4.3268	5.1137	2.39725	1.17612	0.215776	0.259639	6000000000	4083000000	0	184200000	257633	5980000000	0	798400000	895400000											0.122815	0.081271	-0.016795	-0.038001	0.060283	C27	5.1137	0.149746	0.195988	0.239899	0.0448	0.671654	0.151239	1	61739	2	5666	4
1	0	0	3.26839	0.192	-0.0675736	0.133447	3.26839	3.99947	1.87923	1.23762	0.204213	0.246992	7500000000	5427000000	0	231400000	2.10346e+06	7460000000	0	1357000000	1432000000											0.247536	0.487842	0.408697	0.420109	0.601038	C27	3.99947	0.192	0.178542	0.227665	0.029071	0.537406	0.149416	2	73739	3	5046	4
1	0	0	3.9732	0.177256	-0.0659187	0.133447	3.9732	4.42129	1.1399	1.21545	0.203848	0.249845	8600000000	6433000000	0	199000000	4.6564e+06	8609000000	0	1455000000	1526000000											0.154035	0.398629	0.320009	0.311926	0.345222	C27	4.42129	0.177256	0.188219	0.231231	0.056455	0.633018	0.150153	2	65946	3	5117	4
1	0	0	3.54107	0.157136	-0.0639881	0.133447	3.54107	5.08731	0.949069	1.18643	0.199923	0.23985	9900000000	7583000000	0	183700000	5.49983e+06	9950000000	0	1491000000	1563000000	6317000000	6317000000	4261000000	2088000000	1618000000	492800000	-16503543	2196000000	341000000	1855000000	0.155715	0.571116	0.558925	0.519238	0.780067	C27	5.08731	0.157136	0.184796	0.221215	0.06115	0.634916	0.155289	2	699135	2	4391	4
1	0	0	3.18502	0.202369	-0.0604937	0.133447	3.18502	3.94857	0.70665	1.25371	0.183108	0.223906	12000000000	9640000000		328800000	5.49983e+06	12380000000		2441000000	2505000000	7372000000	7372000000	5099000000	2577000000	1805000000	578100000	11785622	2408000000	364100000	2044000000	0.243876	1.29195	1.31981	1.3725	0.869584	C27	3.94857	0.202369	0.16611	0.20706	0.068462	0.595695	0.151215	1	98803	2	4817	4
0	0	0	2.32973	0.632337	-0.0730774	0.030578	2.32973	1.0857	0.204771	2.71988	0.030578	0.081274	3600000000	2468000000		83635455	0	3638000000		2311000000	2321000000											0.203416	-1.06125	-0.865698	-0.947406	-0.301816	C35	1.06758	0.637826	0.031518	0.077294	0.124979	0.921934	0.247255	2	20236	2	4736	1805
0	0	0	2.02125	0.707521	-0.0566108	0.133447	2.02125	1.05954	0.476252	3.41905	0.183029	0.598071	15000000000	11200000000		1038000000	0	15070000000		10570000000	10660000000											0.293772	-0.668547	-0.670104	-0.689196	-0.475565	C35	1.05954	0.707521	0.115674	0.38842	0.088289	1.37333	0.174787	2	25456	2	12072	3782
0	0	0	2.37872	0.513903	-0.0425996	0.133447	2.37872	1.63826	0.724553	2.0572	0.146384	0.354518	25000000000	20570000000		1144000000	0	24800000000		12550000000	12750000000											0.645489	0.583142	0.603292	0.565707	0.093296	C35	1.63826	0.513903	0.117517	0.242076	0.154562	1.01664	0.140709		28326		11699	3901
0	0	0	0.844986	0.501798	-0.0283242	0.113538	0.844986	2.02645	0.553102	2.00722	0.113538	0.248329	35000000000	27890000000		1326000000	0	34710000000		16320000000	19560000000											0.369554	-0.09137	-0.053506	-0.087145	0.353167	C35	1.7086	0.563431	0.099594	0.222938	0.29637	0.949805	0.144258	2	200019	3	16605	4277
0	0	0	0.524342	0.613681	-0.0129932	0.061589	0.524342	1.70199	0.330341	2.58854	0.061589	0.150914	45000000000	35970000000	0	1917000000	0	45360000000	0	21140000000	27840000000											0.306665	0.327849	0.211165	-0.430648	0.071278	C35	1.70199	0.613681	0.061167	0.140717	0.55208	0.708404	0.125425	2	170535	3	15206	3498
0	0	0	0.319728	0.598504	-0.0076101	0.032777	0.319728	1.95861	0.337169	2.49068	0.032777	0.083147	49000000000	38370000000	0	2152000000	0	49100000000	0	19590000000	29380000000											0.077822	1.05392	1.03274	0.768259	0.714573	C35	1.95861	0.598504	0.04533	0.07853	0.77024	0.549828	0.125546	2	158262	3	8325	3739
1	0	0	0.677512	0.581602	-0.0079647	0.008309	0.677512	1.84887	0.240625	2.39007	0.008309	0.02027	49000000000	36540000000	0	2188000000	0	48850000000	0	19760000000	28410000000											-0.0506	-7.21452	-7.13966	-10.029	0.441209	C35	1.84887	0.581602	0.020828	0.019909	0.85962	0.477094	0.250983	2	157569	3	7566	3841
1	0	0	0.704979	0.517557	-0.016811	-0.001369	0.704979	1.70244	0.245753	2.07278	-0.001369	-0.003054	43000000000	32780000000	0	1498000000	0	42710000000	0	19250000000	22100000000											-0.126303	1.45711	-1.58613	-0.116726	0.02063	C35	1.70243	0.517557	0.023315	-0.003042	1.08233	0.390041	2.35526	2	310633	3	14559	4728
1	0	0	0.538602	0.534267	-0.0149833	0.004997	0.538602	1.56135	0.252774	2.14715	0.004997	0.010543	44000000000	30490000000		1821000000	40369399	43980000000		19530000000	23500000000	16890000000	16890000000	16970000000	13610000000	1277000000	1503000000	-54832147	239900000	23301079	216600000	0.028453	0.125329	-0.972458	-1.61806	0.214973	C35	1.56135	0.534267	0.003678	0.010575	0.91255	0.384092	0.097132	2	261840	2	13461	4907
1	0	0	0.651914	0.516661	-0.0066405	0.021948	0.651914	1.73068	0.284302	2.06894	0.021948	0.046198	50000000000	36180000000		1983000000	57518856	49770000000		20900000000	25710000000	29130000000	29130000000	28320000000	23630000000	1652000000	2166000000	318500000	1154000000	125400000	1029000000	0.131727	0.068428	-0.053245	0.088651	0.067999	C35	1.73068	0.516661	0.027069	0.042766	0.497268	0.585314	0.108658	1	269749	3	13620	4775
0	0	0	0.502035	0.35777	-0.0748881	-0.050439	0.502035	0.574303	0.018216	1.55707	-0.055945	-0.106982	2400000000	375300000		459200000	0	2381000000		322500000	1164000000											-0.058403	-950.57	-63.2891	24.6306	1.86984	D44	1.16347	0.488947	-0.014949	-0.112866	0.423829	0.136424	-0.005917	1	39877	3	390	0
0	0	0	3.5077	0.287939	-0.0759179	0.038596	3.5077	1.39649	0.252923	1.40437	0.038596	0.064999	1700000000	508600000		399100000	0	1666000000		364200000	479700000											-0.300335	-0.381482	-0.367192	0.102198	19.1641	D44	1.39649	0.287939	0.077431	0.065837	0.423273	0.194609	0.011702	1	24896	3	387
0	0	0	4.05068	0.302007	-0.0759756	-0.031222	4.05068	1.28712	0.287154	1.43268	-0.031222	-0.044279	1600000000	506600000		388200000	0	1626000000		393600000	491000000											-0.024038	-0.831603	-0.831828	-0.341744	11.6036	D44	1.28712	0.302007	-0.00848	-0.045281	0.381124	0.244679	-0.028445	2	30909	3	385
0	0	0	1.22196	0.486809	-0.0737938	0.07797	1.22196	0.509262	0.260998	1.94859	0.07797	0.135313	3100000000	513700000		1463000000	0	3141000000		1009000000	1529000000											0.931843	-11.0708	-11.1832	-0.444118	37.3169	B09	0.509262	0.486809	0.068229	0.115289	0.065371	0.12161	0.013625		33536		294
0	0	0	1.64744	0.487297	-0.0735277	0.032738	1.64744	0.378878	0.028396	1.95045	0.032738	0.063825	3300000000	378300000	0	1368000000	0	3326000000	0	998400000	1621000000											0.05881	-1.16767	-1.17113	-1.11207	-0.132257	B09	0.378878	0.487297	0.050751	0.062081	0.0232	0.265971	0.336331	2	35377	3	300	0
0	0	0	1.05009	0.358713	-0.0721851	0.013178	1.05009	0.858388	0.620804	1.55936	0.013178	0.02253	4300000000	1124000000	0	1317000000	0	4258000000	0	1309000000	1527000000											0.280341	-1.62167	-1.58131	-1.54415	0.132426	B09	0.858388	0.358713	0.02507	0.0183	0.037793	0.194207	0.415272	2	31157	3	266	0
1	0	0	1.81378	0.299452	-0.072653	0.038565	1.81378	0.6639	0.06102	1.42745	0.038565	0.057583	3900000000	570300000	0	1501000000	0	3933000000	0	859000000	1178000000											-0.165455	-1.30221	-1.33859	-1.35468	-0.35624	B09	0.6639	0.299452	0.047401	0.057324	0.046868	0.294789	0.037524	2	27132	3	243	0
1	0	0	1.54694	0.501488	-0.0642571	0.012893	1.54694	0.802024	0.575831	2.00597	0.012893	0.023576	9800000000	1585000000		3641000000		9763000000		1976000000	4896000000	865700000	865700000	716500000	478800000	3.50404e+06	201000000	53521357	150000000	60804259	89202309	0.492207	-1.10326	-0.857741	-0.861632	0.369349	B09	0.802024	0.501488	0.014619	0.018329	0.001352	0.088675	0.405344	2	48408	2	323	0
1	0	0	1.96835	0.423948	-0.0648785	0.057982	1.96835	0.496881	0.286572	1.73595	0.057982	0.108093	9300000000	921100000		3641000000		9331000000		1854000000	3956000000	2111000000	2111000000	1348000000	769900000	5.58474e+06	224900000	181800000	756100000	202500000	553600000	-0.04419	-0.219157	-0.180773	-0.142308	0.031904	B09	0.496881	0.423948	0.078805	0.102981	0.000832	0.226273	0.267856	2	31793	2	315	0
0	0	0	0.614927	0.572588	-0.0738012	0.048841	0.614927	0.981554	0.088786	2.33966	0.048841	0.12856	3100000000	960700000		154800000	0	3136000000		1309000000	1849000000											0.368295	-88.4223	7.56929	3.31599	0.837205	H61	0.734164	0.589695	0.063465	0.10308	0.088587	0.287458	0.097713	2	35658	2	1018	4
0	0	0	1.22979	0.610817	-0.0726828	0.043824	1.22979	1.09166	0.173995	2.56948	0.043824	0.112472	3900000000	994800000		177500000	0	3912000000		1344000000	2453000000											0.175967	2.36209	4.05422	0.052357	0.538946	H61	0.740259	0.626921	0.0636	0.105806	0.051577	0.324762	0.137246	2	46279	3	1163
0	0	0	1.14125	0.596778	-0.0717502	0.033875	1.14125	0.748544	0.089235	2.48002	0.033875	0.095241	4600000000	1146000000		213500000	0	4560000000		1397000000	3006000000											0.165522	-0.295967	-0.245034	-0.676122	0.050493	H61	0.82009	0.65925	0.053587	0.092355	0.02862	0.301252	0.164619		39485		7728
0	0	0	0.538198	0.68591	-0.0703719	0.026496	0.538198	0.659527	0.167472	3.1838	0.026496	0.081237	5500000000	1392000000		199800000	0	5517000000		2111000000	3784000000											0.209878	0.282037	0.306354	0.253602	0.040227	H61	0.659527	0.68591	0.044371	0.07704	0.041462	0.28368	0.222124	2	51660	3	9055
0	0	0	0.449865	0.731865	-0.0686507	0.019041	0.449865	0.429746	0.079288	3.72947	0.019041	0.065916	6700000000	1329000000	0	411300000	0	6712000000	0	3094000000	4912000000											0.199279	-0.724865	-0.214186	-0.628402	0.193068	H61	0.429746	0.731865	0.033986	0.06469	0.051462	0.245103	0.333073	1	45451	3	8886	78
0	0	0	0.549894	0.76369	-0.0667376	0.015093	0.549894	0.623399	0.05334	4.23173	0.015093	0.060184	8000000000	2680000000	0	435300000	0	8040000000	0	4299000000	6140000000											0.197922	-1.46939	-1.30947	-1.33878	-0.424557	H61	0.623399	0.76369	0.027279	0.058595	0.042849	0.221504	0.413651	2	38965	3	7185	82
1	0	0	0.453283	0.80305	-0.0650233	-0.011113	0.453283	0.693789	0.06782	5.07744	-0.011113	-0.051622	9200000000	3056000000	0	506600000	0	9231000000	0	4405000000	7413000000											0.13301	-3.08586	-3.16429	-3.614	0.625242	H61	0.693789	0.80305	0.003409	-0.052787	0.0522	0.164057	-0.05881	1	40880	3	6247
1	0	0	1.09666	0.642123	-0.0646018	-0.003732	1.09666	0.829425	0.173622	2.79425	-0.003732	-0.013391	9500000000	3468000000	0	484500000	0	9523000000	0	4182000000	6115000000											0.031705	2.57734	1.21313	-1.08793	0.34422	H61	0.829425	0.642123	0.010449	-0.010267	0.084573	0.125437	6.69105	2	32865	2	5298	0
1	0	0	0.830345	0.666576	-0.065487	-0.047504	0.830345	0.712273	0.103494	2.99919	-0.047504	-0.137273	8900000000	3134000000		575000000		8909000000		4401000000	5938000000	1004000000	1004000000	1420000000	436100000	22848088	595000000	276600000	-427100000	10681075	-437800000	-0.064536	2.85778	3.0863	2.82273	0.063053	H61	0.712273	0.666576	-0.01809	-0.147389	0.048953	0.112672	-0.025007	2	31981	2	5323	0
1	0	0	0.471789	0.676985	-0.065316	-0.007883	0.471789	0.674274	0.164989	3.09583	-0.007883	-0.02402	9000000000	3103000000		559100000		9028000000		4603000000	6112000000	1063000000	1063000000	1879000000	476200000	33255672	607000000	275100000	59107992	129800000	-70695402	0.013329	-2.91422	-4.5492	-4.74587	0.460167	H61	0.674274	0.676985	0.022637	-0.024244	0.041472	0.117761	2.19604	2	37331	3	5197	0
0	0	0	0.580777	0.04787	-0.0678561	0.072238	0.580777	0.554138	0.25966	1.05028	0.072238	0.124401	7300000000	489800000		72888205	0	7264000000		1003000000	3455000000											0.256694	-0.584282	-0.549208	-0.482725	-0.110372	G58	0.488329	0.475639	0.082414	0.123906	0.013797	0.128986	0.135448	2	116213	2	1369	13
0	0	0	0.694442	0.549822	-0.0654778	0.046582	0.694442	0.472416	0.186312	2.22134	0.046582	0.096347	8900000000	554700000		66342785	0	8915000000		1174000000	4902000000											0.227346	-0.777114	-0.818833	-0.764736	0.092911	G58	0.472416	0.549822	0.057164	0.093891	0.012674	0.105088	0.136167		108593		1366	25
0	0	0	0.522782	0.210482	-0.0631573	0.045092	0.522782	0.683565	0.603753	1.2666	0.045092	0.09947	11000000000	504200000		59244651	0	10530000000		1232000000	5726000000											0.180735	-0.103111	0.028439	-0.491394	-0.001236	G58	0.409382	0.544009	0.057024	0.09132	0.018004	0.09521	0.113413	2	100704	2	1433	71
0	0	0	0.305472	0.597053	-0.0613197	0.020052	0.305472	0.720991	0.560682	2.48171	0.020052	0.046856	12000000000	1310000000		53166164	0	11800000000		1817000000	7047000000											0.121215	-1.25925	-1.52564	-0.765021	0.076228	G58	0.720991	0.597053	0.038618	0.047074	0.016443	0.091341	0.091072		98964		1477	75
0	0	0	0.27625	0.611355	-0.0593724	0.016123	0.27625	0.346858	0.289051	2.57304	0.016123	0.040775	13000000000	958200000	0	45467841	0	13150000000	0	2762000000	8042000000											0.114564	-1.76843	-1.81358	-1.48124	-0.022054	G54	0.346858	0.611355	0.038433	0.039352	0.019948	0.084056	0.137955	2	93467	2	1636	4
0	0	0	0.264455	0.601973	-0.060035	0.007741	0.264455	0.693643	0.640929	2.51239	0.007741	0.019685	13000000000	1057000000	0	5.32652e+06	0	12690000000	0	1524000000	7642000000											-0.034976	-1.12825	-2.18372	1.15724	-0.024599	G54	0.693643	0.601973	0.041707	0.019801	0.021016	0.104574	-0.399774	2	89112	2	1583
1	0	0	0.434892	0.530826	-0.0602957	0.028471	0.434892	0.58221	0.499166	2.1314	0.028471	0.065701	13000000000	655300000	0	5.05105e+06	0	12510000000	0	1125000000	6642000000											-0.014256	-0.905071	-0.959257	-0.918224	0.020424	G54	0.58221	0.530826	0.0608	0.061122	0.016234	0.116279	0.128985	2	84766	2	1467
1	0	0	0.620249	0.493845	-0.06088	0.043818	0.620249	0.609604	0.570681	1.97568	0.043818	0.089909	12000000000	1054000000	0	4.09961e+06	0	12110000000	0	1729000000	5979000000											-0.032424	-0.537512	-0.509511	-0.454065	-0.001975	G54	0.609604	0.493845	0.072799	0.088021	0.031153	0.127645	0.16031	2	81529	2	1379	91
1	0	0	0.836288	0.449772	-0.0551702	0.083204	0.836288	1.72895	1.68425	1.81743	0.083204	0.156608	16000000000	2672000000		6.13829e+06		16070000000		1546000000	7229000000	2825000000	2825000000	1852000000	1281000000		189800000	340900000	1487000000	314200000	1172000000	0.062507	-0.302733	-0.285647	-0.303055	0.011651	G54	1.72895	0.449772	0.094149	0.132567	0.0144	0.17577	0.211365	2	64783	2	2241	93
1	0	0	0.974836	0.427832	-0.0545209	0.104935	0.974836	1.2004	1.14578	1.74774	0.104935	0.186934	17000000000	2476000000		7.09644e+06		16520000000		2062000000	7069000000	3089000000	3089000000	1700000000	1247000000		189600000	247300000	1896000000	185800000	1710000000	0.028052	-0.381173	-0.30057	-0.300096	0.004595	G54	1.2004	0.427832	0.118471	0.180897	0.029991	0.186951	0.097979	2	65473	2	2191	98
0	0	0	2.34967	1.09653	-0.0778602	-0.050439	2.34967	0.03954	0.004061	-10.3593	-0.098565	0.748402	320000000	11147819		79912324	0	317200000		281900000	347900000											-0.147731	-68.9271	-53.53	-52.481	-0.355039	L72	0.03954	1.09653	-0.039448	1.10956	0.011577	0.27527	-0.05625	1	12852	2	895	0
0	0	0	4.95846	1.09981	-0.0778652	-0.050439	4.95846	0.091573	0.070178	-10.0187	-0.150065	1.52873	310000000	30075226		63064555	0	313700000		328400000	345100000											-0.01105	-6.51159	-6.22432	-6.68798	-0.504704	L72	0.091573	1.09981	-0.088073	1.51186	0.008444	0.288635	-0.022746	2	17457	2	895	0
0	0	0	6.78029	1.03746	-0.0779497	0.133447	6.78029	0.237817	0.199724	-26.6983	0.283391	-3.94421	260000000	62933272		35882866	0	255100000		264600000	264600000											-0.18698	5.40697	7.28058	32.237	9.18666	L72	0.237817	1.03746	0.384682	-8.43609	0.001213	1.48813	0.218458	2	12981	2	361	0
0	0	0	6.83972	0.376404	-0.0776719	0.133447	6.83972	0.613426	0.475178	1.6036	0.254793	0.663946	450000000	78590393		36975136	0	448000000		128100000	168600000											0.005617	-0.614409	-0.615477	-0.621138	-0.194669	L72	0.613426	0.376404	0.222894	0.320619	0.001387	1.2435	0.267631	2	20016	2	733	0
0	0	0	5.82249	0.255149	-0.0775782	0.133447	5.82249	0.653088	0.380517	1.34255	0.21083	0.306293	510000000	83791523	0	81512739	0	513000000	0	128300000	130900000											0.145186	-0.675626	-0.629832	-0.644908	-0.138206	N78	0.653088	0.255149	0.211	0.265107	0.000737	1.33039	0.258926	2	19442	2	780
0	0	0	3.7578	0.280697	-0.077449	0.09395	3.7578	1.12952	0.943545	1.39023	0.09395	0.128514	600000000	79926543	0	78140594	0	602800000	0	70761794	169200000											0.174979	-0.837915	-0.781372	-0.763962	-0.16071	N78	1.12952	0.280697	0.098144	0.120887	0.003346	0.830031	0.303115	1	22355	2	858
1	0	0	3.79992	0.272118	-0.0773309	0.093268	3.79992	0.695218	0.510665	1.37385	0.093268	0.128848	680000000	76885158	0	77305675	0	684700000	0	110600000	186300000											0.135992	-1.10212	-1.04355	-1.02391	-0.249644	N78	0.695218	0.272118	0.098547	0.120467	0.002188	0.706846	0.288082	2	21865	2	1060
1	0	0	5.71975	0.29778	-0.0770601	0.133447	5.71975	0.720607	0.59006	1.42405	0.146817	0.20577	870000000	137600000	0	88854288	0	872800000	0	191000000	259900000											0.274634	-1.19827	-1.11328	-1.11488	-0.358052	N78	0.720607	0.29778	0.140434	0.186552	0.006666	0.773236	0.278091	2	21948	2	1093
1	0	0	1.91638	0.667676	-0.0753731	0.041442	1.91638	0.134364	0.101019	3.00911	0.041442	0.093547	2000000000	157600000		1060000000		2044000000		1173000000	1365000000	592200000	592200000	499100000	358400000	34217538	76753860	16248076	92109120	31667375	60441744	1.34208	-1.58754	-1.48981	-1.44816	-0.364123	N78	0.134364	0.667676	0.037516	0.088973	0.0061	0.289694	0.343803	1	21781	3	1274	13
1	0	0	1.48154	0.331729	-0.0749526	0.030146	1.48154	0.418471	0.307431	1.4964	0.030146	0.058936	2300000000	248400000		1022000000		2336000000		593600000	775000000	549600000	549600000	537000000	379100000	31732017	98486202	17559575	78525377	12500868	66024509	0.142868	-1.12677	-1.16517	-0.259879	-0.373956	N78	0.418471	0.331729	0.035778	0.04229	0.007523	0.235274	0.159195	2	25000	3	1170	14
0	0	0	0.352939	0.466842	-0.0404417	0.052143	0.352939	1.18704	0.327945	1.87562	0.052143	0.102392	26000000000	9728000000		1277000000		26300000000		8195000000	12280000000											0.194828	-1.53234	-1.55994	-1.7454	-0.190999	C22	1.18704	0.466842	0.05881	0.089828	0.112843	0.59049	0.190182	2	153980	2	17163	0
0	0	0	0.557403	0.477652	-0.0376858	0.034998	0.557403	1.49203	0.335088	1.91443	0.034998	0.066339	28000000000	10540000000		1313000000		28210000000		7065000000	13480000000											0.072761	0.218713	0.056389	0.005664	-0.007575	C22	1.49203	0.477652	0.044894	0.064729	0.102723	0.527579	0.186723	2	156835	2	16291	0
0	0	0	0.387076	0.483754	-0.0278006	0.041133	0.387076	1.39248	0.075771	1.93706	0.041133	0.086785	35000000000	11580000000		1459000000	0	35080000000		12660000000	19820000000											0.243293	0.398879	0.300855	0.357466	0.078278	C22	0.914895	0.564953	0.043764	0.085298	0.123383	0.490437	0.166861		168277		17679	0
0	0	0	0.192245	0.555249	-0.0126016	0.014589	0.192245	1.22741	0.115118	2.24845	0.014589	0.038927	46000000000	17240000000		1517000000	0	45630000000		19920000000	30640000000											0.300871	-1.35159	-1.39428	-2.79996	-0.005523	C22	0.865314	0.671543	0.02237	0.03928	0.162639	0.388936	0.157746		166389		17862	5
0	0	0	0.162905	0.699418	-0.0095851	0.001	0.162905	0.952946	0.117243	3.32688	0.001	0.003183	48000000000	19050000000	0	1416000000	0	47730000000	0	19990000000	33380000000											0.045903	-0.16544	-3.15525	0.73379	-0.040995	C22	0.952946	0.699418	0.023875	0.003254	0.18232	0.41407	3.89258	2	156442	2	15775	4
0	0	0	0.178721	0.691966	-0.0098782	0.014496	0.178721	0.875434	0.037617	3.2464	0.014496	0.047637	48000000000	16910000000	0	1365000000	0	47520000000	0	19310000000	32880000000											-0.004265	-0.036375	0.069383	-0.028647	0.061767	C22	0.875434	0.691966	0.03411	0.047161	0.152173	0.429042	0.203094	2	131890	2	12954	4
1	0	0	0.186523	0.747491	0.0035155	0.008689	0.186523	0.838926	0.034742	3.96026	0.008689	0.031277	57000000000	23570000000	0	1319000000	0	56820000000	0	28100000000	42470000000											0.195702	0.539786	0.698871	1.54013	0.021025	C22	0.838926	0.747491	0.029611	0.031594	0.182676	0.336167	0.191975	2	128595	3	12833	12
1	0	0	0.195406	0.778623	0.0339599	0.014511	0.195406	0.723028	0.038823	4.51718	0.014511	0.061881	78000000000	35160000000	0	1463000000	0	77960000000	0	48630000000	60700000000											0.372033	0.664973	0.508279	0.328089	0.03287	C22	0.723028	0.778623	0.033957	0.056662	0.195203	0.259639	0.306515	1	111976	2	11893	11
1	0	0	0.223933	0.725773	0.0401866	0.025244	0.223933	0.765743	0.042387	3.64662	0.025244	0.101578	82000000000	35770000000	0	1541000000	0	82290000000	0	46710000000	59720000000	22910000000	22910000000	20880000000	15790000000	1166000000	1441000000	1819000000	2583000000	560600000	2023000000	0.055459	-0.208796	-0.102688	-0.225578	0.061914	C22	0.765743	0.725773	0.046681	0.089635	0.173486	0.278386	0.217005	2	106915	2	12986	11
1	0	0	0.279961	0.713381	0.0737993	0.040008	0.279961	0.863212	0.048986	3.48895	0.040008	0.14228	110000000000	49420000000		2059000000		105600000000		57250000000	75350000000	29850000000	29850000000	25800000000	19730000000	1304000000	1909000000	2497000000	4536000000	777500000	3759000000	0.283644	0.059561	0.058486	0.177644	-0.03147	C22	0.863212	0.713381	0.059224	0.124164	0.122802	0.28262	0.171392	2	94435	2	13579	0
0	0	0	0.480395	0.003698	-0.0647507	0.028665	0.480395	21.4834	0.125689	1.00371	0.028665	0.120901	9400000000	8066000000	0	24102514	19982542	9420000000	0	6338000000	7114000000											0.065054	-0.240313	-0.08581	-0.131723	0.916988	E48	1.2727	0.755201	0.023714	0.113521	0.299535	0.760221	0.281789	2	49985	2	2624
1	0	0	0.964647	0.708156	-0.0633166	0.036953	0.964647	1.2892	0.096156	3.42649	0.036953	0.132628	10000000000	9446000000	0	27888577	32238780	10420000000	0	7327000000	7376000000											0.03888	0.991825	1.24525	1.2662	1.02667	E48	1.2892	0.708156	0.041731	0.12425	0.485691	0.712248	0.290831	1	61283	2	6753	509
1	0	0	0.590481	0.769289	-0.0566526	0.033856	0.590481	1.30175	0.22255	4.33442	0.033856	0.132392	15000000000	13150000000		42697547	743800	15040000000		10100000000	11570000000	8148000000	8148000000	7569000000	6983000000		389900000	67030039	604100000	173100000	431000000	0.444252	0.576926	0.561318	0.564754	0.765266	E48	1.30175	0.769289	0.033104	0.124175	0.43911	0.541619	0.286603	1	53531	2	7953	516
1	0	0	0.424498	0.769372	-0.0529318	0.035376	0.424498	1.33483	0.163186	4.33599	0.035376	0.153365	18000000000	14500000000		37671647	1572241	17630000000		10870000000	13560000000	12380000000	12380000000	11610000000	10810000000		433600000	79249990	771400000	193600000	577900000	0.171747	0.079438	0.172389	0.059217	0.248412	E48	1.33483	0.769372	0.03728	0.142149	0.390734	0.702609	0.250909	2	51129	2	8445	532
0	0	0	0.491758	0.70319	-0.0708597	0.058055	0.491758	0.852765	0.460703	3.36916	0.058055	0.193929	5200000000	2625000000		166500000	0	5178000000		3078000000	3641000000											0.21677	3.32227	2.92556	3.03045	0.300146	F52	0.852765	0.70319	0.064895	0.178653	0.002462	1.28033	0.268041	2	25476	2	12117	1691
0	0	0	1.28872	0.658624	-0.0698936	0.057608	1.28872	0.344677	0.129259	2.92933	0.057608	0.205406	5800000000	2110000000		1201000000	0	5849000000		3787000000	4293000000											0.129553	1.30038	1.28496	1.57277	0.259583	F52	0.557218	0.734018	0.068599	0.204165	0.00271	1.35709	0.257185	2	23125	2	12990	1598
0	0	0	1.25087	0.706537	-0.0675772	0.056801	1.25087	0.402283	0.218051	3.40758	0.056801	0.221949	7500000000	2904000000		1320000000	0	7457000000		5256000000	5608000000											0.275	0.594086	0.697413	0.679544	0.239804	F52	0.552438	0.751975	0.05984	0.204315	0.001607	1.41296	0.2809		18001		14379	1587
0	0	0	0.797889	0.769568	-0.0643547	0.051932	0.797889	0.539129	0.318051	4.33967	0.051932	0.218126	9700000000	3861000000		1292000000	0	9695000000		7161000000	7461000000											0.300045	-0.055753	0.029988	0.215083	0.238825	F52	0.539129	0.769568	0.051078	0.199359	0.000941	1.31344	0.262121	1	14670	2	15916	1489
0	0	0	0.528453	0.760921	-0.0624198	0.050216	0.528453	0.545615	0.264986	4.18272	0.050216	0.213654	11000000000	4476000000	0	1602000000	0	11040000000	0	8204000000	8399000000											0.138582	0.466367	0.571809	0.670171	0.236545	F52	0.545615	0.760921	0.053671	0.197258	0.000537	1.34995	0.287649	1	18999	2	15793	1330
0	0	0	0.512292	0.752536	-0.0601216	0.051215	0.512292	0.535432	0.222206	4.04099	0.051215	0.210281	13000000000	5016000000	0	1710000000	0	12630000000	0	9368000000	9508000000											0.144569	0.640191	0.61429	0.645909	0.22893	F52	0.535432	0.752536	0.051494	0.193888	0.000532	1.33303	0.295785	2	21576	2	16081	1084
1	0	0	0.512731	0.759467	-0.0557774	0.045341	0.512731	0.374807	0.1892	4.15743	0.045341	0.186109	16000000000	4431000000	0	2871000000	0	15650000000	0	11820000000	11890000000											0.23875	0.326054	0.392631	0.452154	0.239878	F52	0.374807	0.759467	0.04372	0.170338	0.000628	1.09648	0.276736	2	18622	2	15304	913
1	0	0	0.637692	0.767476	-0.0527495	0.047944	0.637692	0.328652	0.171247	4.30062	0.047944	0.202916	18000000000	3846000000	0	2796000000	0	17750000000	0	11700000000	13630000000											0.134335	1.09219	0.947642	0.992388	0.196302	F52	0.328652	0.767476	0.049912	0.193981	0.000528	0.987064	0.253733	2	19552	2	13368	796
1	0	0	0.649367	0.659722	-0.0526959	0.055878	0.649367	0.415385	0.222894	2.93878	0.055878	0.195065	18000000000	4079000000		2726000000		17790000000		9820000000	11740000000	17690000000	17690000000	16400000000	13760000000	2158000000	267600000	48384785	1320000000	327200000	993100000	0.002099	0.487146	0.442037	0.542849	0.31058	F52	0.415385	0.659722	0.058539	0.16404	0.000451	0.994327	0.247821	2	20650	2	11589	679
1	0	0	0.681086	0.601671	-0.0523656	0.069328	0.681086	0.536387	0.21224	2.51049	0.069328	0.187633	18000000000	4942000000		2646000000		18020000000		9214000000	10840000000	18120000000	18120000000	16540000000	14010000000	2082000000	259500000	6.41505e+06	1644000000	402300000	1241000000	0.012892	0.69007	0.661818	0.683287	0.224481	F52	0.536387	0.601671	0.069243	0.17294	0.000516	1.00567	0.244772	2	24569	2	11482	0
0	0	0	1.772	1.0925	-0.0771665	0.073843	1.772	0.248897	0.001604	-10.8107	0.073843	0.191146	800000000	730900000		0	0	798900000		484200000	484500000											0.058654	-1.49641	-1.06683	-1.05595	-0.723463	K70	1.50953	0.606376	0.070003	0.179192	0.006303	0.584415	0.476318	2	44387	3	101	0
0	0	0	3.25727	1.1099	-0.0775032	0.05088	3.25727	0.199107	0.001614	-9.09904	0.05088	0.104578	570000000	512500000		0	0	565100000		194700000	216000000											-0.292638	-5.16197	-10.1941	-10.3404	0.018782	K70	2.63272	0.382128	0.060978	0.099381	0.011332	0.812452	0.261684	2	38658	3	96	0
0	0	0	1.91865	0.226177	-0.0771393	-0.050439	1.91865	0.034116	0.033305	1.29228	-0.0746	-0.177702	820000000	768300000		0	0	817800000		586200000	586400000											0.447122	2.43959	0.555765	0.574615	-0.044532	K70	1.31068	0.717066	-0.063039	-0.222933	0.010225	0.087058	-0.167142	2	31269	3	74	0
0	0	0	1.99974	0.406705	-0.0776662	0.057877	1.99974	1.98264	0.80941	1.6855	0.057877	0.147119	450000000	356900000		0	0	451900000		180000000	183800000											-0.447384	-1.10034	-1.03281	-0.983208	-0.890711	K70	1.98264	0.406705	0.076224	0.137039	0.001267	1.38327	0.393485	1	28573	1	89	0
0	0	0	3.83015	0.212002	-0.0778848	-0.030251	3.83015	3.26396	0.198614	1.26904	-0.030251	-0.045084	300000000	207700000	0	0	0	300100000	0	63630106	63630106											-0.33589	-0.407525	-0.527614	-0.10927	0.808897	K70	3.26396	0.212002	-0.042149	-0.048098	0.054392	0.111246	-0.202984	1	30486	3	79	0
0	0	0	3.78946	0.210434	-0.077871	0.026307	3.78946	3.36769	0.312652	1.26652	0.026307	0.033351	310000000	219500000	0	0	0	309700000	0	65171884	65171884											0.031863	-1.01297	-0.077042	-0.201562	-0.180468	K70	3.36768	0.210434	0.027684	0.032804	0.099305	0.093697	9.73315	1	23513	1	80	0
1	0	0	6.44494	0.167579	-0.0779272	0.012965	6.44494	5.34963	1.04148	1.20132	0.012965	0.016016	270000000	242700000	0	0	0	270700000	0	45364946	45364946											-0.125909	-2.47106	-2.15763	-2.18381	12.6887	K70	5.34963	0.167579	0.013659	0.016697	0.071991	0.225935	0.075405	1	19222	3	82	0
1	0	0	14.4769	0.475371	-0.0777342	-0.050439	12.9916	1.90415	0.593214	1.90611	-0.071671	-0.110605	400000000	366300000	0	65141.1	0	404700000	0	192400000	192400000											0.494966	3.36955	3.17473	3.05216	0.264889	K70	1.90415	0.475371	-0.060492	-0.113998	0.087455	0.048838	-0.006854	2	28007	3	184	0
1	0	0	6.29151	0.596444	-0.0774202	0.08207	6.29151	1.46449	0.920501	2.47797	0.08207	0.181876	620000000	544000000		133146	4.73918e+06	622800000		371400000	371400000	299500000	299500000	259100000	137900000	386137	79482239	-1.19986e+06	51797859	9.63544e+06	42162419	0.53885	-7.23215	-8.44311	-9.7009	40.0803	K70	1.46449	0.596444	0.065775	0.167762	0.017108	0.480917	0.18602	1	19766	3	216	0
1	0	0	3.93483	0.715851	-0.0775709	-0.050439	3.93483	0.589251	0.353518	3.51928	-0.148615	-0.425426	520000000	218500000		148300000	4.65102e+06	518100000		370900000	370900000	22061343	22061343	104900000	19875989	3.63983e+06	76496851	-2.19843e+06	-84776966	-3215.27	-84773750	-0.168106	0.412172	0.409137	0.323321	-0.556575	K70	0.589251	0.715851	-0.167874	-0.575861	0.107678	0.042583	3.8e-05	2	23200	3	192	0
0	0	0	1.95033	0.192152	-0.0759664	0.003482	1.95033	3.62911	0.583574	1.23786	0.003482	0.004246	1600000000	1138000000		208200000	0	1632000000		313600000	313600000											-0.005142	-0.058495	0.887358	0.343239	0.802543	S90	3.62911	0.192152	0.00433	0.004322	0.171362	0.175623	0.603936	2	97473	1	1106	2
0	0	0	5.15659	0.350871	-0.0759783	0.003867	5.15659	0.777368	0.010221	1.54053	0.003867	0.004789	1600000000	1184000000		174700000	0	1624000000		308100000	313100000											-0.005057	-1.0022	-0.217397	-0.574338	0.19598	S90	3.84452	0.192789	0.007292	0.004803	0.151174	0.1678	0.523198		101669		658
0	0	0	5.99302	0.238752	-0.0760779	0.00681	5.99302	1.37944	0.013487	1.31363	0.00681	0.008307	1600000000	1237000000		130000000	0	1555000000		255000000	259500000											-0.042596	78.9413	20.2628	8.90309	0.388169	S90	4.85022	0.166907	0.004604	0.008357	0.051748	0.1272	0.192153		75960		596	7
0	0	0	3.88105	0.247942	-0.0762725	0.012781	3.88105	1.44508	0.059039	1.32968	0.012781	0.014873	1400000000	1060000000		51413655	0	1420000000		154800000	158800000											-0.086901	-2.02549	-2.08854	-1.02249	0.395988	S90	6.84725	0.111885	0.008717	0.015076	0.032483	0.114711	0.062225		80238		420	10
0	0	0	5.7633	0.128211	-0.0761878	0.015458	5.7633	5.72189	2.1404	1.14707	0.015458	0.017571	1500000000	1065000000	0	63108642	0	1478000000	0	186100000	189600000											0.04142	-7.86214	-12.2747	-13.514	0.748268	I63	5.72189	0.128211	0.01049	0.017379	0.009336	0.130498	0.362119	1	62513	3	452	13
0	0	0	13.1546	0.109044	-0.0762604	0.008486	12.9916	7.37872	3.49475	1.12239	0.008486	0.00963	1400000000	1128000000	0	61007176	12279847	1428000000	0	152900000	155700000											-0.034103	-3.25082	-5.13838	-4.55348	0.402488	I64	7.37872	0.109044	0.00304	0.009693	0.010875	0.144188	0.499613	2	43113	3	629	13
1	0	0	19.5933	0.074383	-0.0762505	0.013509	12.9916	11.0577	6.81635	1.08036	0.013509	0.014872	1400000000	1156000000	0	65568363	24310452	1435000000	0	104500000	106700000											0.004826	-3.71871	-5.51316	6.02041	0.501862	I64	11.0577	0.074383	0.012976	0.014559	0.010663	0.135944	0.422908	1	30642	3	1028	18
1	0	0	20.314	0.068741	-0.076183	0.006613	12.9916	11.7849	8.08758	1.07381	0.006613	0.007122	1500000000	1182000000	0	136300000	2.13894e+06	1482000000	0	100300000	101900000											0.032671	-3.10527	-3.63942	-3.61899	0.836495	I64	11.7849	0.068741	-0.004573	0.006989	0.020105	0.130804	0.760131	1	75931	3	1581	11
1	0	0	25.3275	0.053002	-0.076168	0.008811	12.9916	14.2376	11.7804	1.05597	0.008811	0.009382	1500000000	1114000000		202900000	6.61365e+06	1492000000		78262475	79092746	216800000	216800000	306100000	147200000	22916445	154500000	-16765503	29343436	16240956	13102480	0.007055	-4.53217	-5.67593	-5.49632	0.439956	I64	14.2376	0.053002	-0.002455	0.009272	0.031365	0.145304	0.553478	2	40827	3	1737	5
1	0	0	26.7805	0.038413	-0.0762309	-0.000204	12.9916	17.1498	11.4024	1.03995	-0.000204	-0.000214	1400000000	953200000		170400000	48567099	1449000000		55578492	55643932	184000000	184000000	435500000	180800000	21728864	167000000	13459955	8.24065e+06	8540368	-299720	-0.029292	-3.12364	-3.22655	-3.20748	1.33771	I64	17.1498	0.038413	0.009085	-0.000215	0.01525	0.127019	1.03637	1	47293	3	1167	0
0	0	0	1.75961	0.326555	-0.0775444	-0.050439	1.75961	0.289045	0.009948	1.4849	-0.279289	-0.467748	540000000	215000000		91658382	0	536500000		256900000	258400000											-0.211935	38.5194	35.3966	35.4165	-0.527474	R85	0.83695	0.481551	-0.298291	-0.611389	0.645803	0.368028	-0.006124	2	50102		180
0	0	0	6.17218	0.480877	-0.0777231	-0.050439	6.17218	0.264287	0.00353	1.92632	-0.286065	-0.642299	410000000	177000000		83586068	0	412400000		266400000	267900000											-0.231301	24.5216	23.6531	23.745	3.48951	R85	0.664263	0.649683	-0.311644	-0.939445	0.504026	0.432346	-0.030915		50077		192
0	0	0	10.298	0.438212	-0.077904	0.016446	10.298	0.65887	0.128898	1.78003	0.016446	0.037628	290000000	81825105		84479180	0	286800000		124200000	125700000											-0.304541	2.15331	2.21486	1.98584	0.622093	R85	0.65887	0.438212	0.024051	0.035683	0.376033	0.529907	0.039558		26953		187
0	0	0	5.35307	0.528417	-0.0779189	-0.050439	5.35307	0.512928	0.191044	2.12052	-0.109195	-0.210998	280000000	74165703		84126052	0	276500000		144600000	146100000											-0.036091	47.2344	46.4178	46.5867	-0.004571	R85	0.512928	0.528417	-0.110923	-0.235884	0.453077	0.32876	-0.015437		25987		207	0
0	0	0	21.4653	1.27351	-0.0782075	-0.050439	12.9916	0.465048	0.086331	-3.6562	-0.857696	-2.75939	76000000	44348328	0	28377772	0	76059874	0	95362842	96862842											-0.724892	47.5585	47.5626	52.0463	0.230707	R85	0.465048	1.27351	-1.91204	7.26737	0.412663	1.00995	8.1e-05	1	22855	3	206	0
0	0	0	14.7503	0.971638	-0.0781357	0.132006	12.9916	0.411051	0.245301	35.2588	0.132006	-1.54704	130000000	46777208	0	22320068	0	125900000	0	113800000	122300000											0.655205	-13.6196	-17.3816	3.78923	0.277745	R85	0.411051	0.971638	0.117091	3.73317	0.504947	0.208753	0.394911	1	22492	3	154	0
1	0	0	76.0931	1.11816	-0.0781403	-0.050439	12.9916	0.448604	0.344493	-8.46301	-0.187736	5.75885	120000000	60903561	0	14496166	0	122800000	0	135800000	137300000											0.151221	2.54096	2.54096	3.3385	-0.298551	R85	0.448604	1.11816	-0.168429	1.48446	0.459433	0.108948	0	1	25633	3	89	0
1	0	0	17.1414	0.735191	-0.0778833	0.133447	12.9916	0.812709	0.414336	3.7763	0.136326	0.885716	300000000	175700000		8.90691e+06		301200000		216200000	221400000	67251431	67251431	78010825	45583792	1.63465e+06	25337331	3193647	32822949	3.92556e+06	28897385	1.45352	-14.9745	-16.2	-10.3277	5.82423	R85	0.812709	0.735191	0.106548	0.362317	0.551514	0.223288	0.119598	2	20422	3	65	0
1	0	0	18.089	0.682708	-0.0777341	-0.050439	12.9916	0.944433	0.661063	3.15167	-0.102694	-0.348233	400000000	238000000		7.70765e+06		404800000		252000000	276300000	67392990	67392990	103400000	49587754	6.47731e+06	37543732	8.52928e+06	-35785457	463744	-36249201	0.343934	0.366809	0.317361	0.285266	13.5979	R85	0.944433	0.682708	-0.068482	-0.282244	0.077393	0.166495	-0.012959	1	16786	3	143	0
0	0	0	2.05536	0.701689	-0.0769127	-0.050439	2.05536	0.481903	0.015645	3.3522	-0.083349	-0.468467	980000000	558100000		32926434	0	975100000		687700000	844700000											0.038285	0.00408	-0.030553	-0.299609	1.70869	K70	0.811528	0.866267	-0.062568	-0.611761	0.040567	0.104389	-0.00761	2	53924	3	33	0
0	0	0	1.45185	0.499943	-0.0753882	0.053793	1.45185	0.856934	0.296622	1.99977	0.053793	0.20326	2000000000	1068000000		32617179	0	2034000000		1123000000	1368000000											1.08558	-1.82295	-1.83403	-1.85866	7.61715	K70	0.9503	0.672578	0.059438	0.121533	0.00928	0.140191	0.003154		41762		37	0
0	0	0	1.38461	0.642128	-0.0762304	0.020778	1.38461	1.1435	0.256789	2.79429	0.020778	0.061095	1400000000	607300000		33492984	0	1449000000		531100000	930400000											-0.28756	-0.001445	-0.82844	-0.825446	0.819516	K70	1.1435	0.642128	0.041158	0.069776	0.005287	0.473513	0.388327		52354		27	0
0	0	0	0.88212	0.641534	-0.0764276	-0.035655	0.88212	0.714467	0.000805	2.78967	-0.035655	-0.107207	1300000000	559800000		32558550	0	1312000000		781900000	912300000											-0.094511	-0.158132	-0.197426	-0.216067	0.400474	K70	0.715938	0.695355	-0.02345	-0.123145	0.030227	0.177709	-0.172318		44647		28	0
0	0	0	0.806983	0.823408	-0.0762652	-0.050439	0.806983	0.826229	0.083821	5.66277	-0.092791	-0.389914	1400000000	648200000	0	31636551	0	1425000000	0	784600000	1173000000											0.08599	0.146067	0.151318	0.166746	0.311148	K70	0.826229	0.823408	-0.040689	-0.504653	0.048474	0.143192	-0.014077	1	42242	3	26	0
0	0	0	1.14189	0.896609	-0.0765346	0.00651	1.14189	0.592979	0.064542	9.67206	0.00651	0.045666	1200000000	573000000	0	31185914	0	1238000000	0	966200000	1110000000											-0.131285	-4.09804	-4.17864	-3.53645	0.50166	K70	0.592979	0.896609	0.082638	0.067726	0.058334	0.182036	0.254792	1	37262	3	25	2
1	0	0	1.80473	0.988419	-0.0759474	-0.050439	1.80473	0.676904	0.060667	86.3517	-0.125387	-2.45887	1600000000	863700000	0	30660801	0	1645000000	0	1276000000	1626000000											0.329416	0.328365	0.670452	0.688585	0.431636	K70	0.676904	0.988419	-0.044871	-9.48596	0.051813	0.145192	0.075031	1	34036	3	3563
1	0	0	2.44884	1.13602	-0.075848	-0.050439	2.44884	0.718585	0.132181	-7.35201	-0.07567	1.18728	1700000000	1119000000	0	29519154	0	1714000000	0	1557000000	1948000000											0.041939	0.510083	0.49457	0.409473	0.514658	K70	0.718585	1.13602	-0.002688	0.545132	0.064261	0.155776	-0.151283	1	39996	3	3719	0
1	0	0	3.37509	0.955978	-0.0763218	0.049988	3.37509	0.792353	0.19317	22.7158	0.049988	-0.899867	1400000000	990600000		3.69213e+06		1385000000		1250000000	1324000000	969100000	969100000	1054000000	705800000	21903095	102900000	78742377	134700000	57173311	77479725	-0.191884	-4.85364	-6.118	-6.17938	10.0351	K70	0.792353	0.955978	0.112758	1.27034	0.016596	0.699504	0.424597	1	33468	3	3743	0
1	0	0	0.902208	0.572467	-0.0695575	0.055892	0.902208	1.16464	0.305626	2.339	0.055892	0.156831	6100000000	3866000000		398800000		6082000000		3319000000	3482000000	7918000000	7918000000	7693000000	7181000000	184700000	236300000	32018799	284700000	75954171	208700000	0.214693	-0.506819	-0.542939	-0.433822	-0.530917	K70	1.16464	0.572467	0.039576	0.080255	0.009493	1.30173	0.266833	2	30241	3	2968	110
0	0	0	1.81245	0.472927	-0.0732666	0.0706	1.81245	0.635561	0.077569	1.89727	0.0706	0.413036	3500000000	2972000000		0	0	3507000000		2528000000	2813000000											0.088072	-0.439464	-0.432405	-0.430127	-0.554666	K70	1.17569	0.802116	0.069154	0.342337	0.054351	0.287228	0.261371	1	30448	3	559	0
0	0	0	1.58518	0.472984	-0.0703973	0.062852	1.58518	0.575665	0.339558	1.89748	0.062852	0.338766	5500000000	4930000000		0	0	5499000000		3213000000	4522000000											0.568134	-0.262347	-0.234403	-0.205334	1.23351	K70	1.53424	0.822343	0.053633	0.289696	0.058037	0.217596	0.248104		42111		360	0
0	0	0	1.11558	0.156026	-0.069682	0.038764	1.11558	1.43031	0.020385	1.18487	0.038764	0.197568	6000000000	5133000000		194200000	0	5996000000		3872000000	4717000000											0.090314	-0.784657	-0.762924	-0.715317	-0.198784	K70	1.32577	0.786778	0.042733	0.174273	0.09876	0.221331	0.277506		40310		468	0
0	0	0	1.17755	0.692001	-0.0709034	0.055317	1.17755	1.54398	0.03004	3.24676	0.055317	0.215239	5100000000	4172000000	0	221000000	0	5148000000	0	2702000000	3562000000											-0.14144	2.29055	1.14746	1.20535	0.022104	K70	1.54398	0.692001	0.067908	0.194396	0.028985	0.207974	0.11628	2	40224	2	330	0
0	0	0	1.25723	0.450567	-0.0734431	0.041094	1.25723	1.71267	0.091198	1.82006	0.041094	0.101776	3400000000	2507000000	0	379600000	0	3384000000	0	1464000000	1525000000											-0.34257	-13.397	-10.4484	-27.2933	-0.899482	K70	1.71267	0.450567	0.057503	0.094279	0.017683	0.268056	0.076019	2	44412	2	197	0
1	0	0	2.74662	0.524292	-0.0736505	0.001812	2.74662	1.61142	0.055651	2.10213	0.001812	0.003773	3200000000	2384000000	0	324700000	0	3240000000	0	1479000000	1699000000											0.022356	-2.55201	-4.81725	-4.95627	12.2021	B09	1.61142	0.524292	-0.00314	0.003768	0.021971	0.428296	0.866033	1	46529	2	1428	0
1	0	0	3.15915	0.511496	-0.0736669	0.003056	3.15915	1.45278	0.035738	2.04706	0.003056	0.006339	3200000000	2153000000		353500000		3229000000		1482000000	1652000000	812100000	812100000	771200000	507300000	17497517	102100000	8.14878e+06	41401689	31516636	9.88505e+06	-0.00353	-1.084	0.302702	0.335017	0.511248	B09	1.45278	0.511496	0.005585	0.006267	0.00964	0.251519	0.76124	2	62812	2	1538	0
1	0	0	2.68781	0.57663	-0.0746484	-0.050439	2.68781	1.08088	0.046841	2.362	-0.16461	-0.358018	2500000000	1492000000		250200000		2547000000		1380000000	1469000000	769100000	769100000	1236000000	688100000	15901341	101400000	89781555	-489500000	-14082128	-475400000	-0.211072	121.38	473.504	-54.2651	-0.354428	B09	1.08088	0.57663	-0.151385	-0.440819	0.012179	0.301911	0.028768	2	40172	2	1650	0
0	0	0	0.747895	0.328355	-0.0758059	0.039821	0.747895	0.867038	0.399713	1.48888	0.039821	0.074524	1700000000	484900000		56532976	7.72745e+06	1744000000		559200000	572500000											-0.329731	-11.9098	-13.0508	-12.9362	0.419583	S90	0.867038	0.328355	0.07278	0.073872	0.027901	0.977042	0.222357	2	62681	2	786	34
0	0	0	1.89207	0.254169	-0.0758329	0.056926	1.89207	1.21138	0.359252	1.34079	0.056926	0.081235	1700000000	482400000		6.11365e+06	10176244	1725000000		446800000	465400000											-0.010759	7.22273	7.66923	9.58767	0.741104	S90	1.07982	0.269815	0.066452	0.078385	0.192683	0.238151	0.049842	2	62301	2	708	16
0	0	0	2.39777	0.243714	-0.0756999	0.11858	2.39777	1.06059	0.901498	1.32225	0.11858	0.1567	1800000000	606100000		50166768	0	1817000000		263100000	396300000											-0.061146	14.8877	14.4918	13.6785	5.11447	S90	2.30403	0.218068	0.119431	0.147798	0.103192	0.204293	0.035381		52695		613	27
0	0	0	0.803968	0.476831	-0.0733978	0.11263	0.803968	1.48932	1.0609	1.91143	0.11263	0.183727	3400000000	872900000		188800000	0	3416000000		586100000	1629000000											0.700591	-37.1669	-91.4272	-937.196	0.035854	S90	1.48932	0.476831	0.090945	0.164908	0.209002	0.132943	0.011208	1	54847	2	983	34
0	0	0	0.859984	0.4375	-0.0732214	0.043677	0.859984	1.80586	0.641323	1.77778	0.043677	0.080409	3500000000	705000000	0	181400000	0	3538000000	0	390400000	1548000000											0.035867	-0.288199	-0.662404	-0.345742	0.31987	G55	1.80586	0.4375	0.066623	0.076303	0.164003	0.184941	0.055764	2	56240	3	1096	38
0	0	0	1.08255	0.354787	-0.0726556	0.024397	1.08255	2.61052	1.29535	1.54988	0.024397	0.040257	3900000000	787700000	0	224400000	0	3931000000	0	301700000	1395000000											0.111023	358.351	26.8916	31.8451	0.120737	G55	2.61052	0.354787	0.041828	0.035923	0.093533	0.328431	0.08105	2	75014	3	1192	41
1	0	0	1.31682	0.50672	-0.0705975	0.003644	1.31682	0.736966	0.243654	2.02724	0.003644	0.006535	5400000000	1115000000	0	243600000	0	5360000000	0	1513000000	2716000000											0.322512	64.7817	0.910578	0.777011	-0.192302	G55	0.736966	0.50672	0.019303	0.006402	0.11577	0.399055	0.546671	2	107829	3	1259	46
1	0	0	1.06869	0.488875	-0.070433	0.014869	1.06869	0.90232	0.351872	1.95647	0.014869	0.029602	5500000000	1023000000	0	264200000	0	5474000000	0	1134000000	2676000000											0.021304	2.49129	0.221177	0.247264	-0.233492	G55	0.90232	0.488875	0.034294	0.028787	0.137689	0.369473	0.189419	1	106816	3	1993	96
1	0	0	0.866685	0.490038	-0.0700779	0.021477	0.866685	0.999855	0.349315	1.96093	0.021477	0.042068	5700000000	885800000		214400000		5721000000		885900000	2804000000	1801000000	1801000000	1745000000	1398000000	78681738	131900000	102400000	152100000	31869012	120200000	0.045039	1.04822	0.936706	2.21096	-0.068755	G55	0.999855	0.490038	0.038917	0.041208	0.179257	0.314826	0.209537	1	91718	3	2031	105
1	0	0	1.35879	0.477613	-0.0697983	0.02851	1.35879	1.12135	0.486154	1.91429	0.02851	0.055221	5900000000	1040000000		224800000		5915000000		927800000	2825000000	1861000000	1861000000	1773000000	1411000000	83388176	136200000	111100000	203900000	37982665	165900000	0.033942	1.21643	0.610951	0.503767	0.25585	G55	1.12135	0.477613	0.046816	0.05368	0.190857	0.314552	0.186322	1	133549	3	2102	105
0	0	0	1.14146	0.957424	-0.0773645	-0.050439	1.14146	0.3212	0.017039	23.4876	-0.191848	-1.345	660000000	198800000		94478968	0	661500000		618900000	633300000											-0.207457	-0.562044	-0.560292	-0.652278	0.275653	A04	0.3212	0.957424	-0.168545	-5.0958	0.157397	0.605246	-0.006015	1	22346	3	2703	0
0	0	0	3.98874	0.950815	-0.0774622	-0.050439	3.98874	0.659782	0.00344	20.3315	-0.067815	-6.21545	590000000	291300000		91729175	0	593600000		583000000	608000000											-0.102637	-162.723	-76.6628	-0.329902	2.52227	A04	0.499746	1.02438	-0.003369	2.94115	0.092422	0.971298	-0.016463	2	21319	3	2324	0
0	0	0	4.16008	1.01043	-0.0773815	0.012799	4.16008	0.460077	0.084104	-95.8269	0.012799	-0.748842	650000000	289900000		88973369	0	649700000		630000000	656400000											0.094485	2.50692	2.37996	-10.1547	0.109903	A04	0.460077	1.01043	0.044471	-1.17352	0.157427	0.627015	-0.015682		21254		2102	0
0	0	0	6.02132	1.23303	-0.0775834	-0.050439	6.02132	0.309761	0.012776	-4.29127	-0.207243	1.91409	510000000	185700000		82247049	0	509500000		599500000	628200000											-0.215796	1.99454	2.05757	0.841697	-0.262995	C29	0.309761	1.23303	-0.166788	1.0117	0.163291	0.721313	0.002216		19993		2094	0
0	0	0	5.95228	1.46934	-0.0776674	-0.050439	5.95228	0.239207	0.018353	-2.13067	-0.193611	0.562815	450000000	151500000	0	79832696	0	451100000	0	633200000	662800000											-0.114542	15.4831	14.902	14.0438	-0.165767	C29	0.239207	1.46934	-0.101339	0.439204	0.172668	0.674031	-0.034537	2	19762	3	2094	0
0	0	0	4.77738	0.898231	-0.0772612	0.026803	4.77738	0.797898	0.331117	9.82614	0.026803	-0.231517	730000000	516900000	0	21971664	0	733200000	0	647800000	658600000											0.625277	-15.5061	-16.0546	-12.8324	1.14293	C29	0.797898	0.898231	0.067453	0.212709	0.177891	0.371054	0.096862	2	20309	3	2094	0
1	0	0	6.37642	0.980329	-0.0774147	-0.050439	6.37642	0.661879	0.178633	50.8374	-0.080831	-1.26421	630000000	399800000	0	0	0	626600000	0	604100000	614300000											-0.145384	-2.72112	-2.70258	-1.46767	-0.290446	C29	0.661879	0.980329	-0.054149	-4.45876	0.263913	0.361607	-0.015424	2	50468	3	537
1	0	0	12.5023	0.941537	-0.0774993	0.033236	12.5023	0.727116	0.201891	17.1047	0.033236	0.872038	570000000	372500000	0	71440.2	0	567800000	0	512300000	534600000											-0.093768	-8.60916	-8.56995	-2.97512	0.550097	C29	0.727116	0.941537	0.056223	0.597901	0.275534	0.311427	-0.011243	2	47072	3	369	0
1	0	0	19.2399	0.934028	-0.0778252	-0.050439	12.9916	0.872701	0.238785	15.1579	-0.164535	-2.68482	340000000	257500000	0	0	0	341500000	0	295000000	319000000	78835009	78835009	276700000	73382318	6.6442e+06	74786197	5.98196e+06	-78478499	-3.66856e+06	-74809936	-0.398546	3.33967	3.73708	-2.19224	-0.724205	C29	0.872701	0.934028	-0.201533	-3.32032	0.130387	0.230834	0.046746	2	44513	3	70	0
0	1	0	0.583878	0.578799	-0.0744705	-0.024075	0.583878	0.694118	0.081034	2.37416	-0.024075	-0.055537	2700000000	988200000		81536991	0	2671000000		1424000000	1546000000											-0.027016	-2.56632	-2.57509	-2.63015	-0.481923	C26	0.694118	0.578799	0.005055	-0.057951	0.007983	0.755588	0.014603	2	96616	3	3464	1383
0	1	0	2.05952	0.589261	-0.0742745	0.002726	2.05952	0.735633	0.20932	2.43464	0.002726	0.006556	2800000000	1178000000		110800000	0	2807000000		1601000000	1654000000											0.050952	6.59998	6.77572	5.36192	0.513844	C26	0.735633	0.589261	0.024074	0.006477	0.006505	0.813652	0.107911	2	58991	2	3061	1419
0	1	0	2.1428	0.076739	-0.0748328	0.031819	2.1428	5.38747	3.55936	1.08312	0.031819	0.071366	2400000000	1045000000		87372335	0	2419000000		1220000000	1242000000											-0.138119	4.44407	4.46414	6.59204	-0.18983	C26	0.857001	0.513404	0.057806	0.07063	0.002134	1.11707	0.009967		46727		3041	1457
0	1	0	1.30165	0.048826	-0.0749268	-0.04855	1.30165	8.58228	0.141535	1.05133	-0.04855	-0.100951	2400000000	795500000		101900000	0	2354000000		1165000000	1236000000											-0.026971	11.6636	11.6651	7.16502	-0.056673	C26	0.682839	0.524906	-0.027049	-0.103606	0.001184	1.09901	-0.029707		70950		3360	1538
0	1	0	1.52476	0.509003	-0.0750029	0.001857	1.52476	0.787692	0.343401	2.03667	0.001857	0.003845	2300000000	777300000	0	77295622	0	2301000000	0	986700000	1171000000											-0.022432	-23.1815	-23.9053	0.451092	-0.085919	C26	0.787692	0.509003	0.025909	0.003826	0.00145	0.944115	0.078498	1	67005	3	3340	1663
0	1	0	1.76259	0.48871	-0.0756641	-0.050439	1.76259	0.566967	0.106884	1.95584	-0.092269	-0.184532	1800000000	437400000	0	72865409	0	1842000000	0	771500000	900300000											-0.19951	1.42197	1.42284	1.82278	0.415677	C26	0.566967	0.48871	-0.0813	-0.202953	0.002981	1.0887	-0.005971	2	74588	2	3095	1693
1	1	1	1.85074	0.559173	-0.0757193	-0.050439	1.85074	0.570846	0.16086	2.26846	-0.080232	-0.168402	1800000000	533600000	0	70834077	0	1804000000	0	934800000	1009000000											-0.02083	1.19907	1.19907	2.1671	-0.002827	C26	0.570846	0.559173	-0.056883	-0.183938	0.011026	1.13772	-0.000141	2	83666	2	3116	2110
1	1	1	3.35686	0.484045	-0.0760956	0.003907	3.35686	0.561774	0.246026	1.93815	0.003907	0.008218	1500000000	394900000	0	64369062	0	1543000000	0	703000000	746700000											-0.144834	-6.28225	-7.031	-3.55516	-0.081972	C26	0.561774	0.484045	0.029142	0.008214	0.002837	1.05028	0.684318	2	48347	3	2811	2182
1	1	1	5.63688	0.35885	-0.0764136	0.037931	5.63688	0.547131	0.103492	1.5597	0.037931	0.066113	1300000000	241400000		62513780		1322000000		441300000	474300000	1534000000	1534000000	1486000000	1273000000	47537230	129500000	18984472	54286711	-34201.2	54320912	-0.143156	3.0224	3.00675	1.4869	0.30467	C26	0.547131	0.35885	0.055463	0.064102	0.003924	1.16074	-0.00063	2	75714	3	2589	2218
1	1	1	3.58826	0.416092	-0.0761557	0.029965	3.58826	0.786195	0.218131	1.7126	0.029965	0.049066	1500000000	468500000		60946667		1501000000		595900000	624500000	1728000000	1728000000	1675000000	1432000000	49961705	160400000	11165550	42533543	245504	42288040	0.135483	-4.07679	-4.09798	12.0712	0.120662	C26	0.786195	0.416092	0.035617	0.048257	0.003432	1.15151	0.005772	2	56437	3	2537	2263
0	0	0	1.42766	0.332509	-0.0752999	0.060677	1.42766	2.84922	0.072155	1.49815	0.060677	0.095814	2100000000	1771000000		8.69435e+06	0	2095000000		621600000	696600000											-0.030394	-0.996511	-0.997837	-0.989224	-0.555162	K70	2.84922	0.332509	0.061547	0.092328	0.046817	0.309968	0.266885	2	206470	3	71	0
0	0	0	1.7933	0.558298	-0.0733554	0.044526	1.7933	6.93062	0.782164	2.26397	0.044526	0.084475	3400000000	3138000000		8.47702e+06	0	3445000000		452800000	1923000000											0.644468	-0.252764	-0.322406	-0.328379	-0.326342	K70	6.93062	0.558298	0.03576	0.081052	0.044	0.17982	0.255268	2	211462	3	85	0
0	0	0	1.02373	0.576666	-0.0730047	0.011161	1.02373	6.94735	0.611731	2.3622	0.011161	0.025823	3700000000	3413000000		8.2597e+06	0	3689000000		491300000	2127000000											0.070683	-1.30814	-1.11354	-1.07478	-0.10457	K70	6.94735	0.576666	0.011322	0.025494	0.066072	0.119932	0.320267		191537		80	0
0	0	0	0.805857	0.310536	-0.0731988	-0.003967	0.805857	4.51338	0.211716	1.4504	-0.003967	-0.009243	3600000000	3157000000		3.0833e+06	0	3554000000		1257000000	2007000000											-0.036544	-3.3011	-2.07808	-2.03359	-0.094007	K70	2.51265	0.564651	-0.003664	-0.009286	0.119693	0.150736	1.77435	1	173175	3	87	0
0	0	0	1.11358	0.585663	-0.0726418	0.019757	1.11358	2.16541	0.128606	2.4135	0.019757	0.046565	3900000000	3494000000	0	23580.3	0	3941000000	0	1613000000	2308000000											0.125484	5.36943	2.63868	2.71087	3.59382	K70	2.16541	0.585663	0.019388	0.045344	0.20555	0.181076	0.12576	1	153287	3	68	0
0	0	0	1.3571	0.507358	-0.0734273	0.012736	1.3571	2.04627	0.066713	2.02987	0.012736	0.028266	3400000000	2141000000	0	0	0	3395000000	0	1046000000	1723000000											-0.117618	0.319005	0.893848	-0.378673	4.86226	K70	2.04627	0.507358	0.014316	0.027929	0.179967	0.183238	0.266444	1	126969	3	153	0
1	0	0	2.61367	0.614595	-0.0730928	-0.050439	2.61367	1.28792	0.073918	2.59468	-0.077279	-0.176738	3600000000	2485000000	0	109987	0	3628000000	0	1929000000	2229000000											0.068398	-22.2907	-19.8167	-22.2104	1.49502	C32	1.28792	0.614595	-0.054453	-0.194095	0.077369	0.454929	0.019963	1	165143	3	105	0
1	0	0	3.55193	0.628225	-0.072834	-0.004683	3.55193	1.075	0.034772	2.6898	-0.004683	-0.012376	3800000000	2571000000	0	92357.9	0	3807000000	0	2392000000	2392000000											0.049541	-4.63031	-3.99279	-3.95069	-0.236072	C30	1.07499	0.628225	0.02413	-0.0123	0.016258	0.293164	0.088441	1	195178	3	74	2
1	0	0	2.02308	0.629227	-0.0730722	-0.050439	2.02308	1.50707	0.024032	2.69707	-0.12752	-0.343457	3600000000	3318000000		82194.3		3642000000		2202000000	2292000000	1416000000	1416000000	1969000000	1412000000	3.0125e+06	46330900	111300000	-437500000	37499385	-475000000	-0.045415	13.8716	12.6643	10.2333	1.29604	C30	1.50707	0.629227	-0.099866	-0.351739	0.00931	0.388716	-0.085721	2	191670	3	128	0
0	0	0	1.426	0.470707	-0.0741063	0.024843	1.426	1.32208	0.443829	1.88931	0.024843	0.038117	2900000000	1610000000		154400000	4.01029e+06	2924000000		967400000	1089000000											-0.007438	-3.11	4.97401	-27.4926	0.004485	C27	1.66414	0.372558	0.034005	0.039742	0.166803	0.704094	0.309943	2	34405	2	4241	135
0	0	0	2.93781	0.287711	-0.0738175	0.133447	2.93781	2.36946	0.718293	1.40392	0.1699	0.253102	3100000000	1842000000		146300000	7.36997e+06	3124000000		777200000	898900000											0.068597	0.264383	0.270634	0.231857	0.06503	C27	2.36946	0.287711	0.168671	0.230871	0.143554	0.830837	0.128303	2	24320	2	4683	630
0	0	0	2.92588	0.462324	-0.0730432	0.133353	2.92588	1.14538	0.558383	1.85986	0.133353	0.186033	3700000000	2156000000		163800000	4.33214e+06	3662000000		925200000	1023000000											0.172071	0.037798	0.032648	-0.032752	0.068706	C27	2.32997	0.279313	0.123448	0.171453	0.160913	0.7446	0.152112		18817		4641	68
0	0	0	1.12222	0.584187	-0.0716882	0.093842	1.12222	0.938903	0.618764	2.40493	0.093842	0.137255	4600000000	2908000000		170400000	1.51015e+06	4603000000		1521000000	1591000000											0.256941	0.328004	0.120438	0.068543	0.134612	C27	1.91184	0.345714	0.079748	0.128767	0.17773	0.687156	0.162696		28837		5308	188
0	0	0	1.58364	0.435524	-0.0702036	0.092847	1.58364	1.25153	0.49602	1.77155	0.092847	0.153502	5600000000	2974000000	0	205100000	1.51015e+06	5634000000	0	2376000000	2454000000											0.223955	-0.068688	-0.118836	-0.305239	0.010248	C27	1.25153	0.435524	0.081314	0.149436	0.196277	0.699982	0.151861	1	20291	2	5587	543
0	0	0	1.68853	0.451033	-0.068861	0.085901	1.68853	1.27946	0.322331	1.8216	0.085901	0.154463	6600000000	2981000000	0	224500000	0	6566000000	0	2330000000	2961000000											0.165476	-0.028286	-0.023067	0.016004	0.293365	C27	1.27946	0.451033	0.077507	0.145369	0.228063	0.703423	0.166874	1	18548	2	5058	585
1	0	0	2.00209	0.440964	-0.0678002	0.079838	2.00209	1.18609	0.265668	1.78879	0.079838	0.144042	7300000000	3166000000	0	258300000	0	7303000000	0	2669000000	3220000000											0.112184	-0.273499	-0.357683	-0.233962	-0.045359	C27	1.18609	0.440964	0.078637	0.135611	0.193515	0.759213	0.150919	2	11628	2	5544	590
1	0	0	2.82182	0.404534	-0.0666841	0.085768	2.82182	1.13406	0.24314	1.67936	0.085768	0.148345	8100000000	3578000000	0	259500000	13252992	8078000000	0	3155000000	3268000000											0.106117	-0.302874	-0.257771	-0.219505	-0.021202	C27	1.13406	0.404534	0.085022	0.137126	0.189728	0.819621	0.183629	2	18068	2	5913	621
1	0	0	2.40577	0.325153	-0.0631533	0.089206	2.40577	1.80351	0.622817	1.48182	0.089206	0.1393	11000000000	5971000000		298900000	14821798	10530000000		3311000000	3424000000	7652000000	7652000000	6776000000	2748000000	3070000000	724600000	5.4115e+06	1005000000	175100000	829900000	0.303524	-0.214564	-0.182691	-0.180815	-0.005994	C27	1.80351	0.325153	0.079334	0.116797	0.191376	0.726715	0.174264	2	13319	2	6297	637
1	0	0	2.31242	0.293382	-0.0554219	0.133447	2.31242	2.57307	1.67783	1.41519	0.33963	0.489409	16000000000	11350000000		263800000	25328934	15900000000		4411000000	4664000000	8531000000	8531000000	7490000000	3083000000	3265000000	934000000	-39007813	5725000000	1237000000	4488000000	0.509862	-0.951606	-0.953779	-0.890655	-0.105814	C27	2.57307	0.293382	0.279832	0.399488	0.159041	0.536615	0.216111	2	35681	2	6963	617
0	0	0	1.07546	0.216988	-0.0738773	0.043983	1.07546	3.28932	1.29972	1.27712	0.043983	0.063259	3100000000	1201000000		600700000	0	3083000000		386700000	974400000											0.157702	0.505337	0.405624	0.38215	0.367873	K70	3.10522	0.316078	0.055005	0.05993	0.004478	0.134089	0.144471	2	37140	3	84	97
0	0	0	2.46616	0.21781	-0.0732898	0.04678	2.46616	3.80527	0.839414	1.27846	0.04678	0.07105	3500000000	1767000000		571100000	0	3491000000		679800000	1271000000											0.132329	1.79187	1.76737	-0.837596	1.73633	K70	2.59844	0.364112	0.0561	0.069268	0.017055	0.130077	0.156085	2	62552	3	81	96
0	0	0	1.30375	0.467011	-0.0716849	0.040492	1.30375	3.05827	1.15498	1.87621	0.040492	0.070133	4600000000	3023000000		541500000	0	4605000000		988500000	2151000000											0.319239	-0.077039	-0.012465	-0.106571	-0.409085	K70	3.05827	0.467011	0.042528	0.066779	0.095305	0.169839	0.205843		71232		615
0	0	0	0.61456	0.456428	-0.0707511	0.045557	0.61456	2.39166	0.385046	1.83968	0.045557	0.08458	5300000000	3465000000		511900000	0	5254000000		1449000000	2398000000											0.140795	6.07598	5.22215	4.43163	4.58958	K70	2.39167	0.456428	0.054714	0.078639	0.328879	0.171398	0.203795		63038		692	94
0	0	0	0.564554	0.551443	-0.0685724	0.00492	0.564554	2.31035	0.362183	2.22937	0.00492	0.010039	6800000000	4705000000	0	487600000	0	6766000000	0	2037000000	3731000000											0.287953	-1.9523	-2.06898	-3.04946	0.229277	K70	2.31035	0.551443	0.008218	0.009743	0.190004	0.089894	-0.138101	2	61742	3	1344	103
0	0	0	0.477089	0.589756	-0.0672884	0.012667	0.477089	1.64078	0.253398	2.43757	0.012667	0.02958	7700000000	5178000000	0	456900000	0	7658000000	0	3156000000	4516000000											0.131767	-6.80534	-4.89742	-5.86746	1.68371	K70	1.64078	0.589756	0.022813	0.029079	0.101961	0.120618	0.139272	2	62011	3	1238	107
1	0	0	1.31987	0.547649	-0.0677202	-0.01329	1.31987	1.91553	0.24127	2.21067	-0.01329	-0.029993	7400000000	5040000000	0	395500000	0	7358000000	0	2631000000	4030000000											-0.055313	-2.08194	-1.65658	-1.6381	0.018461	K70	1.91553	0.547649	0.003291	-0.03024	0.021321	0.156974	-0.437187	2	44174	3	1263	105
1	0	0	1.4973	0.489082	-0.0688379	0.011101	1.4973	3.21052	0.613299	1.95726	0.011101	0.023127	6600000000	5090000000	0	364000000	0	6582000000	0	1585000000	3219000000	682600000	682600000	775600000	443900000	30943831	58393770	103600000	89553029	12178174	77374855	-0.105479	2.88515	4.86433	4.30294	0.209031	K70	3.21052	0.489082	0.027501	0.023008	0.0101	0.10371	0.135988	2	51917	3	1163	102
1	0	0	0.818734	0.451933	-0.0692338	0.015283	0.818734	3.49682	0.254075	1.82459	0.015283	0.028885	6300000000	4796000000		327100000		6307000000		1372000000	2850000000	1041000000	1041000000	916100000	787700000	30578120	36416732	56481320	131300000	32800879	98491032	-0.041763	1.05989	1.23479	1.69241	0.780109	K70	3.49682	0.451933	0.024571	0.028492	0.009106	0.165027	0.249832	1	68170	3	701	115
0	0	0	4.05648	0.558796	-0.0774112	-0.050439	4.05648	0.393897	0.066057	2.26653	-0.156171	-0.316382	630000000	167600000		46234935	0	629000000		352900000	355100000											-0.08337	0.13545	0.039968	0.104173	0.010996	C26	0.474996	0.564549	-0.13708	-0.374464	0.003189	1.03917	-0.027653	2	12204	3	1487	718
0	0	0	0.582996	0.598935	-0.0757918	0.044211	0.582996	0.901748	0.459842	2.49336	0.044211	0.106229	1800000000	781800000		96559868	0	1753000000		867000000	1050000000											0.209248	0.021774	-0.054371	-0.089659	0.223715	F52	0.901748	0.598935	0.054065	0.100696	0.009314	1.16415	0.264102	2	13137	2	1544	822
0	0	0	1.31654	0.611367	-0.0748176	0.037958	1.31654	0.660922	0.518373	2.57312	0.037958	0.096378	2400000000	850500000		92740383	0	2430000000		1287000000	1486000000											0.385783	-0.048522	0.116256	0.116552	0.361472	F52	0.660922	0.611367	0.043205	0.084075	2.5e-05	0.952514	0.291298	2	60884	2	1677	0
0	0	0	1.48649	0.605198	-0.0744188	0.059277	1.48649	0.922632	0.730117	2.53292	0.059277	0.151261	2700000000	1227000000		88920897	0	2707000000		1330000000	1638000000											0.113952	0.475168	0.469147	0.563899	0.345057	F52	0.922632	0.605198	0.065604	0.142463	2.2e-05	0.932718	0.261626		87490		1847	0
0	0	0	1.11829	0.644467	-0.0737876	0.043491	1.11829	0.481928	0.389849	2.81267	0.043491	0.11638	3100000000	888300000		213200000	0	3145000000		1843000000	2027000000											0.161915	0.008976	0.285964	0.442933	0.72555	F52	0.481928	0.644467	0.049685	0.113802	0.005983	1.07409	0.308961	2	61419	2	3475	0
0	0	0	0.856053	0.671566	-0.0730842	0.032707	0.856053	0.592375	0.53613	3.04475	0.032707	0.095914	3600000000	1390000000	0	205700000	0	3634000000	0	2347000000	2440000000											0.155297	-0.205339	0.156166	0.611016	0.389637	F52	0.592375	0.671566	0.048346	0.092893	0.007245	0.936452	0.306097	2	62905	2	3478	0
0	0	0	1.16742	0.644833	-0.0731157	0.033546	1.16742	0.606689	0.552854	2.81558	0.033546	0.098158	3600000000	1367000000	0	281600000	0	3612000000	0	2253000000	2329000000											-0.006029	0.132911	0.813862	-0.179469	0.427433	F52	0.606689	0.644833	0.050206	0.094739	0.010275	0.987273	0.242474	1	67145	2	3486	0
1	0	0	2.47943	0.545332	-0.0732574	0.09832	2.47943	0.767485	0.597863	2.19941	0.09832	0.243229	3500000000	1372000000	0	272600000	0	3513000000	0	1787000000	1916000000											-0.027242	1.58997	1.58357	1.58804	0.302566	F52	0.767485	0.545332	0.112045	0.219274	0.010091	1.10534	0.200041	1	48526	2	3521	0
1	0	0	3.26446	0.373586	-0.070665	0.054606	3.26446	1.45645	1.30582	1.59639	0.054606	0.097852	5300000000	2631000000	0	498000000	0	5313000000	0	1807000000	1985000000											0.512376	2.59364	3.29122	2.90625	0.321469	F52	1.45645	0.373586	0.049026	0.072407	0.012508	0.734069	0.237693	2	78050	2	3579	0
1	0	0	2.80295	0.370194	-0.0703165	0.037041	2.80295	1.44384	1.35521	1.58779	0.037041	0.058969	5600000000	2816000000		492900000		5555000000		1950000000	2057000000	3931000000	3931000000	3640000000	3135000000	111300000	324500000	11404884	266300000	64970373	201300000	0.045538	-0.887395	-0.813416	-0.793848	0.384684	F52	1.44384	0.370194	0.038288	0.057533	0.014134	0.707553	0.244006	2	90120	2	3582	0
1	0	0	1.6525	0.377534	-0.0699172	0.03456	1.6525	1.02109	0.931551	1.60651	0.03456	0.055203	5800000000	2111000000		518100000		5833000000		2068000000	2202000000	4060000000	4060000000	3778000000	3252000000	104000000	343400000	12987891	265400000	68641571	196800000	0.049919	-0.736701	-0.620809	-0.598269	0.361364	F52	1.02109	0.377534	0.035965	0.054201	0.015701	0.695998	0.258612	2	92272	2	3724	0
0	0	0	2.09941	0.669169	-0.0710949	0.133447	2.09941	2.73682	0.087094	3.02269	0.32361	0.988518	5000000000	4986000000		0	0	5015000000		1822000000	3356000000											0.82864	3.70765	3.50528	3.35764	1.03033	K70	2.73682	0.669169	0.161843	0.489217	0.001638	0.397134	0.246102	2	29214	3	399	253
0	0	0	0.951843	0.734616	-0.0679758	0.040436	0.951843	2.09496	0.048587	3.76812	0.040436	0.138339	7200000000	7127000000		0	0	7181000000		3402000000	5275000000											0.43188	10.6042	8.56357	8.33309	9.1919	K70	2.09496	0.734616	0.034611	0.129389	0.000552	0.174071	0.271044		26443		475	251
0	0	0	0.525215	0.380559	-0.0634463	0.04624	0.525215	0.992304	0.034271	1.61436	0.04624	0.192007	10000000000	10260000000		1.11571e+06	0	10330000000		6959000000	8015000000											0.438014	-0.49628	-0.380112	0.347461	0.695233	K70	1.47377	0.776253	0.039489	0.175188	0.012314	0.157605	0.221434		22903		559	249
0	0	0	0.752793	0.73887	-0.0628659	0.040302	0.752793	1.21911	0.050129	3.82951	0.040302	0.165991	11000000000	9003000000	0	1.32772e+06	0	10730000000	0	7385000000	7927000000											0.039024	6.82416	6.65353	-12.8427	5.88305	K70	1.21911	0.73887	0.033078	0.151439	0.007476	0.191639	0.156875	2	20903	2	524	0
0	0	0	0.630969	0.604261	-0.0664716	0.047842	0.630969	1.53771	0.074592	2.52692	0.047842	0.149719	8200000000	7500000000	0	1596568	0	8225000000	0	4877000000	4970000000											-0.23336	0.454202	0.567468	0.553346	0.454721	K70	1.53771	0.604261	0.039628	0.139292	0.003213	0.564351	0.237616	2	20757	2	698	0
1	0	0	1.34011	0.387116	-0.0696718	0.043471	1.34011	3.84757	0.236352	1.63163	0.043471	0.089197	6000000000	5334000000	0	1.16524e+06	0	6003000000	0	1386000000	2324000000											-0.27016	-0.304842	-0.899585	-0.888308	-0.848169	K70	3.84757	0.387116	0.050894	0.084056	0.007364	0.5764	0.157607	2	15984	2	849	0
1	0	0	2.72462	0.543365	-0.06689	0.014818	2.72462	3.03833	0.117866	2.18993	0.014818	0.028283	7900000000	7230000000	0	901834	0	7935000000	0	2380000000	4311000000											0.321772	36.0181	24.4592	25.0532	8.48315	K70	3.03833	0.543365	0.020261	0.028501	0.044847	0.141716	0.126349	2	71395	2	911	0
1	0	0	1.50788	0.668969	-0.0623218	0.015643	1.50788	1.77748	0.139643	3.02086	0.015643	0.040805	11000000000	10080000000		732747		11110000000		5671000000	7430000000	1728000000	1728000000	1603000000	1308000000	26500282	71352416	102400000	198600000	49708995	148900000	0.39977	51.4036	53.8291	70.7148	4.41133	K70	1.77748	0.668969	0.022626	0.040508	0.031336	0.15555	0.250242	2	40189	2	936	0
1	0	0	0.815574	0.678841	-0.0593139	0.044568	0.815574	1.93675	0.132714	3.11372	0.044568	0.136851	13000000000	12060000000		1.41723e+06		13200000000		6228000000	8957000000	4264000000	4264000000	3675000000	3204000000	65781328	76941001	94460891	666700000	125200000	541500000	0.188046	5.45158	-13.9472	-10.9399	0.960044	K70	1.93675	0.678841	0.0482	0.12779	0.00936	0.323164	0.187725	2	45359	2	1182	3
0	0	0	2.87879	0.074033	-0.0771994	-0.050439	2.87879	4.75465	0.649432	1.07995	-0.169832	-0.184595	780000000	416000000		42620845	0	776100000		80607930	83206959											-0.121362	-58.9261	-43.3772	-61.7015	0.455126	C27	5.16023	0.107216	-0.18184	-0.203365	0.472542	0.231179	0	2	236189	3	365
0	0	0	5.66281	0.085609	-0.0772331	0.030536	5.66281	4.04098	0.518817	1.09362	0.030536	0.033221	750000000	409500000		27343669	0	752700000		40317436	40317436											-0.030118	5.95493	6.6554	6.07434	0.069533	C27	10.157	0.053564	0.033383	0.032765	0.408472	0.257847	0.030968		208599		413	0
0	0	0	7.49125	0.085566	-0.0769316	0.010844	7.49125	4.36708	1.65091	1.09357	0.010844	0.011679	960000000	356000000		168900000	0	962000000		81518340	82318340											0.278132	-0.164408	1.17815	-0.575146	0.319623	C27	4.36708	0.085566	0.009082	0.010568	0.401708	0.21659	-0.056663		238966		392	0
0	0	0	4.10788	0.055853	-0.0769202	0.002538	4.10788	9.68647	3.84526	1.05916	0.002538	0.002731	970000000	505900000		172400000	0	969900000		52225745	54173845											0.008206	-2.52506	-2.33234	-2.61589	0.262324	C27	9.68647	0.055853	0.001846	0.002677	0.337159	0.251709	0.477475		193607		384	0
0	0	0	4.36476	0.090497	-0.0770024	0.015382	4.36476	5.75269	2.47231	1.0995	0.015382	0.016587	910000000	456400000	0	161700000	0	912900000	0	79333213	82610613											-0.058852	-0.011154	-0.068536	-0.077375	0.307997	C27	5.75269	0.090497	0.015116	0.017441	0.359062	0.287524	0.31384	1	186518	3	471	0
0	0	0	4.13032	0.111607	-0.0771324	-0.050439	4.13032	5.26768	1.63767	1.12563	-0.114628	-0.127436	820000000	449600000	0	98004258	0	822600000	0	85342773	91805939											-0.098887	-49.7284	-30.8953	-30.9645	-0.120698	C27	5.26768	0.111607	-0.114324	-0.136108	0.34836	0.253768	-0.056853	1	183685	3	424	0
1	0	0	6.90916	0.117947	-0.0771389	-0.011198	6.90916	3.80604	0.303704	1.13372	-0.011198	-0.01265	820000000	348600000	0	102000000	0	818100000	0	91598208	96490512											-0.005472	-7.96253	-5.90328	-5.80702	0.065301	C27	3.80604	0.117947	-0.006279	-0.012731	0.349601	0.294873	22.0223	1	185893	3	389	0
1	0	0	8.75926	0.270619	-0.0771152	-0.050439	8.75926	2.11608	0.094879	1.37103	-0.136637	-0.169744	830000000	442800000	0	59103307	0	834500000	0	209300000	225800000											0.020102	5.345	5.38419	-17.5015	-0.076635	C27	2.11608	0.270619	-0.128377	-0.185486	0.417423	0.285004	-0.184684	1	122736	3	430	0
1	0	0	8.98647	0.399331	-0.0768519	0.006057	8.98647	1.66777	0.160263	1.66481	0.006057	0.009196	1000000000	675900000		69344196	0	1017000000		405300000	406300000	327300000	327300000	316200000	113200000	105600000	83096147	13315994	12766712	7.15805e+06	5608662	0.219082	-1.23929	-1.14978	-1.91553	0.222868	C27	1.66777	0.399331	0.018602	0.009178	0.35771	0.321729	0.560681	1	80783	3	413	0
1	0	0	7.55898	0.274877	-0.0769754	0.010929	7.55898	3.03214	0.160426	1.37908	0.010929	0.016555	930000000	769800000		45640251		931600000		253900000	256100000	346100000	346100000	351300000	82847747	168200000	79825819	1.86726e+06	16832672	6.18234e+06	10650335	-0.084267	-2.51271	-2.2031	-2.1178	-0.329964	C27	3.03214	0.274877	0.013436	0.015766	0.324829	0.371451	0.367282	1	70746	3	280	0
0	0	0	1.04995	0.252087	-0.0776458	-0.050439	1.04995	2.10112	0.246231	1.33705	-0.056037	-0.077113	470000000	232200000		27314467	0	466100000		110500000	117500000											-0.095295	3.01829	2.92365	10.2482	-0.132367	C34	2.10112	0.252087	-0.051235	-0.078871	0.18222	0.63063	0.093652	2	28387	2	1504	0
0	0	0	6.32938	0.280165	-0.0775768	0.006063	6.32938	1.93933	0.199926	1.38921	0.006063	0.008488	510000000	303300000		26702973	0	514000000		155500000	162500000											0.102878	-2.10847	-1.5936	-3.2858	-0.045759	C34	1.94976	0.316073	0.011951	0.008452	0.232152	0.565692	0.23814	2	19333	2	1577
0	0	0	6.33059	0.245625	-0.0776252	0.022834	6.33059	2.09872	0.128862	1.3256	0.022834	0.031804	480000000	234900000		17377477	0	480400000		111900000	118000000											-0.065396	31.1701	19.1338	-98.8119	0.475214	C34	2.09872	0.245625	0.030735	0.031328	0.183122	0.724067	0.029694	2	27504	2	1492
0	0	0	2.86684	0	-0.0776372	-0.023688	2.86684	0	0	1	-0.023688	-0.031621	470000000	244400000		17036396	0	472100000		115300000	121000000											-0.017339	2.04588	2.85547	4.38693	-0.018852	C34	2.11927	0.256212	-0.009669	-0.032129	0.185844	0.737371	0.11215	1	25317	2	1482
0	0	0	4.7929	0.252177	-0.0776341	0.007389	4.7929	2.10314	0.154641	1.33721	0.007389	0.009908	470000000	242100000	0	16934019	0	474200000	0	115100000	119600000											0.004508	0.06251	3.79018	-0.91155	0.466874	C34	2.10314	0.252177	0.02018	0.009859	0.249372	0.636954	0.327134	2	30034	2	1450	492
0	0	0	1.88308	0.266653	-0.0712335	0.133447	1.88308	2.32434	1.14843	1.36361	0.140763	0.191614	4900000000	2729000000	0	125600000	25562533	4919000000	0	1174000000	1312000000											0.528877	-0.492817	-0.5147	-0.505185	-0.515121	C30	2.32434	0.266653	0.088295	0.105226	0.136342	0.422944	0.177126	2	26130	2	4514	1758
1	0	0	2.00249	0.187685	-0.0712472	0.080699	2.00249	2.92854	0.636222	1.23105	0.080699	0.104426	4900000000	2494000000	0	175100000	15200663	4909000000	0	851700000	921400000											-0.001934	0.719553	0.665731	0.626549	0.226857	C30	2.92744	0.018772	0.085125	0.099441	0.204786	0.414687	0.169271	2	31186	2	4620	1679
1	0	0	3.39099	0.190203	-0.070866	0.049386	3.39099	2.92083	0.395227	1.23488	0.049386	0.060893	5200000000	2679000000	0	179400000	30413066	5174000000	0	917200000	984100000											0.053915	-0.450001	-0.469635	-0.548573	-0.02294	C30	2.88042	0.192024	0.049736	0.059426	0.389748	0.299234	0.183802	2	63712	2	4520	440
1	0	0	1.49954	0.282137	-0.0635317	0.017761	1.49954	2.38334	0.990533	1.39302	0.017761	0.023723	10000000000	6528000000		587100000	4.21936e+06	10270000000		2739000000	2897000000	3801000000	3801000000	3655000000	2988000000	92648744	480900000	14643474	179200000	23913464	155300000	0.28745	4.41814	3.27478	1.98725	6.78231	C30	2.38084	0.282296	0.014782	0.018605	0.270054	0.368408	0.131166	2	69780	2	10464	0
1	0	0	1.42097	0.226262	-0.0643063	0.011448	1.42097	3.20422	1.1575	1.29243	0.011448	0.015366	9700000000	6169000000		567100000		9729000000		1925000000	2201000000	4775000000	4775000000	4616000000	3863000000	86615989	556700000	-6.08348e+06	150800000	30510171	120300000	-0.052391	2.08043	1.87261	2.43051	1.20563	C35	3.20422	0.226262	0.01114	0.015205	0.193203	0.490857	0.204851	2	88422	2	8838	6778
0	0	0	0.486062	0.72901	-0.0700406	0.015143	0.486062	0.684851	0.292854	3.69018	0.015143	0.050808	5700000000	1497000000		399971	0	5747000000		2186000000	4190000000											0.184165	-3.03602	-2.91547	-3.39513	-0.269718	C25	0.684851	0.72901	0.041564	0.051537	0.059776	0.465728	0.25456	1	128857	3	10276	481
0	0	0	0.603084	0.821311	-0.0691975	-0.050439	0.603084	0.784094	0.27799	5.59633	-0.067369	-0.302642	6300000000	1703000000		572455	0	6332000000		2171000000	5201000000											0.101868	0.829893	0.803441	0.750913	-0.028717	C25	0.784094	0.821311	-0.038731	-0.35959	0.093827	0.271659	-0.040633	2	106364	3	10711	481
0	0	0	0.435529	0.876566	-0.067117	0.001698	0.435529	0.525416	0.160401	8.1015	0.001698	0.010563	7800000000	1833000000		1020791	0	7777000000		2750000000	6640000000											0.22814	-2.42563	-2.29902	-0.922047	-0.083726	G55	0.666675	0.853835	0.029231	0.010538	0.086266	0.292282	0.260944		93641		10397	481
0	0	0	0.250053	0.973778	-0.0656098	-0.050439	0.250053	0.336229	0.12632	38.1359	-0.106349	-1.29044	8800000000	1614000000		854591		8823000000		4799000000	8592000000											0.134565	2.18414	2.20652	2.50769	-0.00694	G55	0.336229	0.973778	-0.06265	-3.81521	0.085988	0.290167	-0.001519		90472		9637	445
0	0	0	0.40386	1.08799	-0.0707621	-0.050439	0.40386	0.264312	0.013132	-11.3647	-0.269433	11.1595	5200000000	1187000000	0	714671	0	5246000000	0	3347000000	5817000000											-0.405458	5.8046	5.80715	0.133239	-0.068467	G55	0.354685	1.10886	-0.295377	3.31906	0.141182	0.401852	-0.000243	1	95950	3	3583	443
0	0	0	2.49907	8.61179	-0.0773333	-0.050439	2.49907	0.056539	0.009953	-0.131375	-1.56132	1.60422	680000000	320800000	0	0	0	683100000	0	5674000000	5882000000											-0.870067	24.6713	24.6982	3.70108	0.145471	G55	0.056539	8.61179	-6.35275	0.890204	0.118733	1.98251	-0.000562	1	77086	3	2204	438
1	0	0	23.9943	0.501002	-0.0775778	0.133447	12.9916	1.87565	0.438768	2.00401	0.239659	0.642728	510000000	374400000	0	0	0	513300000	0	199600000	257200000											-0.001339	54.2708	14.1044	4.78935	-0.056764	G55	1.87565	0.501002	0.238453	0.480602	0.257179	1.49998	0.024723	2	240316	1	565	423
1	0	0	15.1491	0.496333	-0.077557	0.018665	12.9916	1.97629	0.516971	1.98544	0.018665	0.037229	530000000	417700000		0		527800000		211300000	262000000	712100000	712100000	689900000	577500000	10495749	61147182	-760278	14383794	4.66749e+06	9.7163e+06	0.028148	0.022699	-0.044423	0.556556	0.268912	G55	1.97629	0.496333	0.016969	0.036551	0.238346	1.34923	0.324497	1	144879	1	516	419
1	0	0	7.80988	0.391237	-0.0775668	0.096916	7.80988	2.62101	1.15761	1.64267	0.096916	0.17435	520000000	423700000				521000000		161700000	203800000	832400000	832400000	783600000	695600000	10423534	69464841	668901	55720312	4.90047e+06	50819847	-0.012942	0.07396	0.049287	-0.270264	0.059747	G55	2.62101	0.391237	0.098836	0.160246	0.130684	1.5979	0.087948	1	118229	3	460	411
0	0	0	0.34487	0.682342	-0.0734345	0.008099	0.34487	0.665309	0.148967	3.14804	0.008099	0.025537	3400000000	1511000000		579000000	0	3390000000		2271000000	2313000000											0.028581	0.650129	2.02799	1.44728	-0.505561	C38	0.665309	0.682342	0.022391	0.023804	0.065102	1.27892	0.143291	2	74522	2	3493	0
0	0	0	0.964571	0.718073	-0.0714231	0.073662	0.964571	0.965675	0.230041	3.54701	0.073662	0.248236	4800000000	3138000000		603700000	15413613	4787000000		3250000000	3437000000											0.228514	-0.223708	-0.216294	-0.478692	0.448157	C38	0.965675	0.718073	0.066992	0.223165	0.050143	1.32113	0.158462	2	51994	2	3394	733
0	0	0	0.793026	0.574369	-0.0680687	0.054859	0.793026	1.31336	0.52836	2.34945	0.054859	0.159431	7100000000	5385000000		681900000	13505660	7116000000		4092000000	4370000000											0.486581	-0.645049	-0.747042	-2.48002	-0.427868	C38	1.31608	0.614091	0.044171	0.11889	0.045285	1.15611	0.133374	2	61263	2	3796	732
0	0	0	0.335047	0.624569	-0.0673682	0.012098	0.335047	1.29744	0.322661	2.66361	0.012098	0.031796	7600000000	5636000000		648700000	25167493	7603000000		4344000000	4748000000											0.068351	30.6603	2.57452	5.16201	-0.206478	C38	1.29744	0.624569	0.004457	0.031195	0.06344	1.18434	0.207443		57513		4048	766
0	0	0	0.346881	0.621935	-0.0669598	0.020812	0.346881	1.35116	0.397856	2.64505	0.020812	0.055238	7900000000	5778000000	0	628300000	31746326	7886000000	0	4276000000	4905000000											0.0373	-0.275713	0.793659	-1.65556	-0.214998	C38	1.35116	0.621935	0.012483	0.05406	0.08099	1.18016	0.306034	2	64870	2	15070	790
0	0	0	0.418069	0.623602	-0.0660438	0.033658	0.418069	1.36117	0.466612	2.65676	0.033658	0.089232	8500000000	6531000000	0	593100000	9.51607e+06	8522000000	0	4798000000	5314000000											0.080652	0.544059	-0.229321	-0.126357	-0.207444	C38	1.36117	0.623602	0.022893	0.086085	0.081153	1.23665	0.097915	2	58561	2	13256	254
1	0	0	0.50882	0.61834	-0.0653427	0.031989	0.50882	1.37828	0.525783	2.62013	0.031989	0.084382	9000000000	6936000000	0	561900000	25194157	9009000000	0	5032000000	5571000000											0.057127	-0.220091	-0.208885	-0.531229	-0.18928	C38	1.37828	0.61834	0.019927	0.081552	0.107776	1.19489	0.192853	2	59179	2	14352	233
1	0	0	0.56644	0.622796	-0.0652603	0.002348	0.56644	1.40039	0.419541	2.65109	0.002348	0.006188	9100000000	6854000000	0	578000000	53344828	9066000000	0	4894000000	5646000000											0.00635	-329.924	-11.1483	-10.5374	0.053714	C38	1.40039	0.622796	-0.008859	0.006205	0.128253	1.14886	0.346008	2	69624	2	18290	152
1	0	0	0.540711	0.586964	-0.0603042	0.020411	0.540711	1.50544	0.586607	2.42109	0.020411	0.051286	13000000000	10230000000		614000000	45023751	12510000000		6795000000	7341000000	12530000000	12530000000	12360000000	10030000000	1855000000	472100000	-139900000	249200000	29044016	220200000	0.35403	-0.028242	-0.355756	-0.533003	-0.192011	C38	1.50544	0.586964	0.006419	0.042618	0.089326	1.00153	0.116543	2	59595	2	18967	146
1	0	0	0.313142	0.676899	-0.05533	0.002536	0.313142	1.30589	0.504014	3.09501	0.002536	0.006993	16000000000	13190000000		772900000	85624079	15960000000		10100000000	10800000000	16800000000	16800000000	16900000000	13800000000	2434000000	496900000	-33648833	56614906	20520374	36094533	0.276148	-4.08432	-3.14009	-3.34793	-0.223765	C38	1.30589	0.676899	0.000153	0.006999	0.105993	1.05237	0.362455	2	61794	2	17179	136
0	0	0	0.803337	0.695836	-0.074264	0.029325	0.803337	0.720088	0.084274	3.2877	0.029325	0.102659	2800000000	1288000000		215800000	4460000	2814000000		1789000000	1958000000											0.023257	1.6501	8.8421	-5.47444	0.892486	C27	0.720088	0.695836	0.063715	0.098113	0.104226	0.936596	0.27577	2	53103	3	5485	3953
0	0	0	2.1342	0.671257	-0.0740757	0.042077	2.1342	0.797266	0.17273	3.04189	0.042077	0.132847	2900000000	1463000000		205900000	4479800	2945000000		1835000000	1977000000											0.046457	2.21924	0.95746	-3.58419	0.109129	C27	0.797266	0.671257	0.062826	0.125153	0.072063	0.949085	-0.030191		104528		5170	4213
0	0	0	2.62828	0.618722	-0.0739169	0.073016	2.62828	0.879587	0.187676	2.62276	0.073016	0.205393	3100000000	1529000000		200500000	4719800	3055000000		1738000000	1890000000											0.037438	-0.196851	-0.081228	-0.291118	-0.198003	C27	0.879587	0.618722	0.088786	0.188047	0.0622	1.0856	0.147919		72801		5694	4402
0	0	0	2.41261	0.504818	-0.0732772	0.112421	2.41261	1.19362	0.243399	2.01946	0.112421	0.23794	3500000000	1873000000	0	238300000	3319800	3500000000	0	1569000000	1767000000											0.111889	0.133166	0.242024	0.192689	-0.094612	C27	1.19362	0.504818	0.119679	0.215606	0.048195	1.23182	0.151219	1	59140	3	5390	4846
0	0	0	0.950934	0.321461	-0.07735	0.008724	0.950934	1.84383	0.426785	1.47375	0.008724	0.013221	670000000	377700000		45877410	0	671500000		204800000	215900000											-0.04605	-1.34818	-1.06549	-3.54476	-0.206104	C26	1.84383	0.321461	0.019554	0.013168	0.126574	1.53088	0.339852		27865		634	24
0	0	0	1.88169	0.372397	-0.0772247	0.012789	1.88169	1.48433	0.302452	1.59336	0.012789	0.019869	760000000	450700000		44715202		758500000		280000000	293700000											0.129553	-0.226418	0.46603	-0.416487	-0.036476	C26	1.60961	0.38723	0.017713	0.019674	0.126253	1.2755	0.391871		23164		625	6
0	0	0	2.72178	0.470502	-0.0769747	0.01698	2.72178	1.28622	0.205943	1.88858	0.01698	0.030507	930000000	602700000		43066680		932100000		445100000	455900000											0.227482	1.50691	0.606475	-0.382019	0.35999	C26	1.35401	0.489093	0.019807	0.030141	0.113268	1.38231	0.13027		17350		598	0
0	0	0	1.52487	0.345721	-0.0761308	0.014907	1.52487	2.11716	0.915661	1.5284	0.014907	0.024857	1500000000	1091000000		41617440	0	1518000000		515100000	524800000											0.628658	-0.701408	-0.52941	-0.716654	0.08937	C26	2.11715	0.345721	0.013635	0.018387	0.100668	1.34768	0.286867	2	22356	3	596	10
0	0	0	1.31816	0.449016	-0.0756664	0.012042	1.31816	1.5964	0.309781	1.81493	0.012042	0.020149	1800000000	1292000000	0	60337089	0	1841000000	0	809200000	826400000											0.212438	0.24416	0.083692	-0.39124	-0.014657	C26	1.5964	0.449016	0.013438	0.019941	0.118563	1.75083	0.253799	2	30562	3	780	20
0	0	0	1.64448	0.58191	-0.0747226	0.015129	1.64448	1.13445	0.137908	2.39183	0.015129	0.031885	2500000000	1612000000	0	58721665	0	2496000000	0	1421000000	1452000000											0.356039	1.74009	0.552369	-0.096813	0.958617	C26	1.13445	0.58191	0.022909	0.031436	0.157784	1.63751	0.087101	1	33964	3	739	8
1	0	0	1.47233	0.642641	-0.0739801	0.014514	1.47233	1.12205	0.046775	2.79831	0.014514	0.03771	3000000000	2117000000	0	56976445	0	3011000000	0	1887000000	1935000000											0.206566	0.512237	0.578498	0.478627	0.106792	C26	1.12205	0.642641	0.023601	0.037137	0.168418	1.7961	0.168682	2	34187	3	704	6
1	0	0	1.90509	0.68796	-0.0732334	0.009072	1.90509	1.11607	0.036519	3.20471	0.009072	0.02725	3500000000	2662000000	0	56825009	0	3530000000	0	2385000000	2428000000											0.173196	-0.623592	-0.43595	-0.848505	0.383997	C26	1.11607	0.68796	0.0185	0.026937	0.172774	2.14463	0.165965	2	39394	3	746	690
1	0	0	1.42452	0.571952	-0.0723112	0.010128	1.42452	1.41558	0.073223	2.33618	0.010128	0.027016	4200000000	3315000000		58446993		4170000000		2342000000	2385000000	9849000000	9849000000	9805000000	9546000000	119600000	81833271	23937586	54046822	15054754	38992068	0.181398	3.24836	3.51463	4.80793	0.451263	C26	1.41558	0.571952	0.01509	0.021843	0.178328	2.36174	0.27855	2	34753	3	805	664
1	0	0	0.860592	0.617673	-0.0713861	0.007525	0.860592	1.35876	0.097356	2.61556	0.007525	0.018648	4800000000	3970000000		57967549		4813000000		2921000000	2973000000	11810000000	11810000000	11790000000	11480000000	130100000	100800000	59295802	46634701	12835057	33799644	0.154035	8.71307	7.72282	14.2035	0.186596	C26	1.35876	0.617673	0.019344	0.018369	0.189755	2.45416	0.275225	2	36469	3	848	678
0	0	0	1.3445	0.242183	-0.0771414	0.005285	1.3445	0.737119	0.455231	1.31958	0.005285	0.007075	820000000	97468453		42681519		816300000		127400000	201500000											0.027848	-2.18287	-2.1795	-2.18113	0.453653	H61	0.765244	0.246785	0.014588	0.006909	0.074192	0.327985	0.238394	2	30975	2	1425	698
0	0	0	2.80211	0.242701	-0.0771528	-0.050439	2.80211	0.606753	0.426753	1.32048	-0.064682	-0.085643	810000000	71391214		40301087		808400000		117700000	196200000											-0.009712	1.63263	1.69318	1.02541	0.478664	H61	0.606753	0.242701	-0.059841	-0.08583	0.055304	0.273162	0.253809	2	29200	2	1337	0
0	0	0	3.74642	0.188249	-0.0772555	0.008765	3.74642	1.02101	0.755622	1.2319	0.008765	0.01114	740000000	87303259		38125662		737100000		74556551	133200000											-0.088222	1.64141	3.63385	13.61	0.26464	H61	1.17097	0.180748	0.013384	0.011217	0.053809	0.363481	0.321727	2	39269	2	1213	0
0	0	0	2.29247	0.173977	-0.0772853	0.028175	2.29247	1.73384	1.50754	1.21062	0.028175	0.034252	720000000	148100000		36513442		716400000		85413871	124600000											-0.02808	0.4195	0.324287	0.747221	0.150861	H61	1.73384	0.173977	0.030384	0.034602	0.02157	0.433376	0.256423	1	30871	2	1171	0
0	0	0	2.31852	0.177834	-0.07725	0.042506	2.31852	2.30855	2.12868	1.2163	0.042506	0.051581	740000000	227700000	0	35262473	0	740900000	0	98640771	131800000											0.034225	-0.195856	-0.168234	-0.172611	0.049813	H61	2.30856	0.177834	0.041765	0.050844	0.020945	0.443757	0.2512	1	30855	2	1154	920
0	0	0	2.13267	0.160154	-0.0772208	0.04583	2.13267	1.65532	1.46204	1.19069	0.04583	0.055142	760000000	144800000	0	33577769	0	761200000	0	87481657	121900000											0.027411	0.179843	0.205142	0.193902	0.06705	H61	1.65532	0.160154	0.044047	0.053841	0.02147	0.416009	0.248713	1	26716	2	1125	978
1	0	0	4.28841	0.29115	-0.0771923	0.047161	4.28841	1.43333	1.1353	1.41074	0.047161	0.060971	780000000	118900000	0	32327833	0	781000000	0	82971607	227400000											-0.034569	0.19017	0.200613	0.205986	-0.058289	H61	1.43333	0.29115	0.051388	0.065689	0.047318	0.386423	0.243674	1	17961	2	994	1037
1	0	0	6.34031	0.269534	-0.0771024	0.048301	6.34031	3.18115	2.87538	1.36899	0.048301	0.067078	840000000	266300000	0	31061897	0	843400000	0	83705055	227300000											0.079908	0.615031	0.410172	0.42227	0.010117	H61	3.18115	0.269534	0.051908	0.063678	0.04841	0.362589	0.170424	1	19870	2	888	1076
1	0	0	4.87537	0.269299	-0.0770887	0.036095	4.87537	1.60088	1.15333	1.36855	0.036095	0.049405	850000000	147600000		30570201		852900000		92217822	229700000	302800000	302800000	276900000	137000000	51224603	72637702	4.47872e+06	40101577	9486705	30614872	0.011265	-0.808293	-0.824274	-0.87826	-0.002267	H61	1.60088	0.269299	0.041145	0.049122	0.063396	0.354983	0.236567	1	29825	2	1017	1133
1	0	0	1.72307	0.419242	-0.0719256	0.070001	1.72307	1.2886	0.993325	1.72189	0.070001	0.115718	4400000000	1786000000		582700000	285118	4438000000		1386000000	1861000000	6392000000	6392000000	6193000000	5334000000	490400000	303200000	24036844	246400000	61191942	185200000	0.339191	-0.418869	-0.407461	-0.395048	-0.201689	H61	1.2886	0.419242	0.047143	0.071849	0.019368	1.44028	0.248365	2	26932	2	5549	1208
0	0	0	1.11077	0.756393	-0.0737898	0.012847	1.11077	0.923416	0.183969	4.10497	0.012847	0.050242	3100000000	2069000000		168100000	0	3144000000		2241000000	2378000000											0.130941	0.279885	-0.396954	3.2327	0.295058	C26	0.923416	0.756393	0.050854	0.049683	0.041906	1.11296	0.287507	2	20907	3	2183	27
0	0	0	1.27007	0.800544	-0.072934	0.000791	1.27007	0.914689	0.24252	5.01363	0.000791	0.003603	3700000000	2648000000		159400000	0	3738000000		2895000000	2992000000											0.189039	-50.7556	-15.6685	436.876	0.442632	C26	0.914689	0.800544	0.026492	0.003652	0.016996	0.949411	0.801876	2	26807	3	2490	124
0	0	0	1.17938	0.802555	-0.0729958	-0.002571	1.17938	0.896096	0.192877	5.06471	-0.002571	-0.012957	3700000000	2587000000		155600000	0	3695000000		2887000000	2965000000											-0.011474	-0.530864	-0.871308	-0.903027	0.698626	C26	0.896096	0.802555	0.023459	-0.013099	0.014906	1.03084	220.393	2	24222	3	2178	113
0	0	0	0.919262	0.620172	-0.0672949	0.012944	0.919262	0.943388	0.174518	2.63277	0.012944	0.040394	7700000000	3963000000		339200000	0	7653000000		4201000000	4746000000											1.07135	-50.8563	-62.5467	-8.19683	1.00025	C26	0.943388	0.620172	0.026887	0.025266	0.0236	0.756439	0.251852		13531		3131	133
0	0	0	0.653841	0.650526	-0.0651892	0.035594	0.653841	0.944784	0.148167	2.86144	0.035594	0.097966	9100000000	5270000000	0	331400000	0	9116000000	0	5578000000	5930000000											0.191046	0.009086	0.019345	-0.143353	0.470316	C26	0.944784	0.650526	0.052071	0.093681	0.036685	0.787153	0.192143	2	23333	2	3727	132
0	0	0	0.73819	0.655206	-0.063473	0.038279	0.73819	0.821983	0.115023	2.90028	0.038279	0.110316	10000000000	5168000000	0	368700000	0	10310000000	0	6287000000	6753000000											0.014621	0.048909	0.131707	0.090759	0.454396	C26	0.821983	0.655206	0.056352	0.104602	0.061604	0.702547	0.196979	2	23545	2	3977	151
1	0	0	0.752736	0.631668	-0.0629156	0.038609	0.752736	0.843022	0.094609	2.71494	0.038609	0.108215	11000000000	5503000000	0	400200000	0	10690000000	0	6528000000	6755000000											0.037554	-0.950307	-0.861035	-1.03791	0.098196	C26	0.843022	0.631668	0.059989	0.102924	0.090904	0.63702	0.182505	2	22847	2	3868	158
1	0	0	1.04456	0.519008	-0.0664701	0.013966	1.04456	0.769471	0.090842	2.07904	0.013966	0.033467	8200000000	3197000000	0	417700000	0	8226000000	0	4155000000	4269000000											-0.23079	-3.02058	-2.23087	-2.98573	-0.669384	C26	0.769471	0.519008	0.031318	0.033392	0.132801	0.553911	0.312634	1	18293	2	2851	18
1	0	0	0.951603	0.541315	-0.0631817	0.013556	0.951603	0.912568	0.094368	2.18015	0.013556	0.028937	11000000000	4890000000		456100000		10510000000		5358000000	5689000000	3538000000	3538000000	3465000000	2887000000	167700000	260000000	99288425	176600000	49609213	127000000	0.277572	-5.97349	-21.1574	-4.57748	-0.508074	C26	0.912568	0.541315	0.021531	0.026344	0.315955	0.3366	0.280908	2	15745	2	2917	14
1	0	0	0.960008	0.549127	-0.060744	0.062206	0.960008	0.960534	0.185131	2.21792	0.062206	0.136871	12000000000	5855000000		461200000		12200000000		6096000000	6701000000	4974000000	4974000000	4251000000	3388000000	223300000	408500000	183100000	847300000	140900000	706400000	0.161057	0.035221	0.11197	0.208353	0.076256	C26	0.960534	0.549127	0.072895	0.1284	0.245638	0.407647	0.166261	1	17548	2	3438	15
0	0	0	2.09554	0.208478	-0.0780546	-0.050439	2.09554	0.666395	0.628569	1.26339	-0.063125	-0.080284	180000000	24758309		0	0	182200000		37152601	37993384											-0.090907	1.88927	1.91404	1.331	0.903685	S90	0.666395	0.208478	-0.068298	-0.084267	0	0.02644	0	2	10926	2	55	0
0	0	0	6.62117	0.219517	-0.0780405	0.003878	6.62117	0.548889	0.070443	1.28126	0.003878	0.004943	190000000	24943567		0	0	192100000		42234872	42620908											0.053908	11.1073	11.3381	-12.945	1.82784	S90	0.590592	0.221908	0.003886	0.004857	0	0.061969	0.074164		10286		55	0
0	0	0	6.15165	0.184769	-0.0780398	0.036219	6.15165	0.649879	0.621167	1.22665	0.036219	0.045462	190000000	22884178		0	0	192500000		35212964	35567138											0.002236	-10.2699	-11.9653	-11.6986	35.6675	S90	0.649879	0.184769	0.036029	0.044378	0	0.23073	0.221333		12617		30	0
0	0	0	3.17923	0.267413	-0.0780316	0.022787	3.17923	0.55343	0.550053	1.36503	0.022787	0.028312	200000000	39166594		17305	0	198200000		40327541	40666390											0.029562	-1.1627	-0.868839	-6.78402	0.518937	S90	0.971212	0.205193	0.022675	0.028259	0	0.045313	0.194543		9763		24
0	0	0	4.48921	0.201354	-0.0780245	0.01831	4.48921	2.3946	0.582325	1.25212	0.01831	0.022981	200000000	97134028	0	15141.9	0	203100000	0	40563755	40902605											0.02499	-1.32115	-1.26517	-1.26302	-0.971965	K70	2.3946	0.201354	0.016222	0.022647	0.843388	0.320995	0.28793	1	8513	1	18	0
0	0	0	9.33008	0.214055	-0.078032	-0.033174	9.33008	1.16896	1.08436	1.27235	-0.033174	-0.041867	200000000	49136855	0	12978.8	0	198000000	0	42034755	42373604											-0.02551	3.2116	3.74238	3.79904	1.10779	K70	1.16896	0.214055	-0.034578	-0.042762	0.243616	0.051366	-0.147013	1	9694	3	18	0
1	0	0	9.16928	0.214994	-0.0780279	0.010167	9.16928	0.266519	0.061662	1.27387	0.010167	0.012944	200000000	11415386	0	0	0	200800000	0	42831478	43170328											0.014357	-0.306381	-0.098797	-0.086609	0.10704	K70	0.266519	0.214994	0.009859	0.01286	0.284258	0.093654	0.455668	1	7020	3	17	2
1	0	0	19.1295	0.570159	-0.0778341	-0.050269	12.9916	0.810841	0.120492	2.32644	-0.050269	-0.089311	340000000	154800000	0	0	0	335400000	0	190900000	191200000											0.670129	-25.6653	-12.2599	-12.0209	0	K70	0.810841	0.570159	-0.039625	-0.093486	0.732922	0.074742	-0.291826	1	12020	2	13	4
1	0	0	1.08986	0.987003	-0.0733609	-0.050439	1.08986	0.409605	0.257463	76.943	-0.053426	-1.06829	3400000000	1383000000		85661158		3441000000		3377000000	3397000000	1307000000	1307000000	1422000000	978900000	121100000	249900000	53149404	-113500000	-12618500	-100900000	9.2618	1.52093	2.34048	2.57941	-0.185898	P82	0.409605	0.987003	-0.013872	-2.25566	0.027932	0.379746	0.11117	1	14786	2	14888	0
0	0	0	0.669618	0.622624	-0.0446411	0.076203	0.669618	0.613543	0.097235	2.64988	0.076203	0.239559	23000000000	13790000000		1195000000	0	23380000000		16020000000	16090000000											0.187914	-1.55149	-1.48275	-1.57746	-0.191673	C38	0.860846	0.688136	0.08692	0.212698	0.0648	1.93783	0.116469	2	71901	2	40795	0
0	0	0	1.52444	0.597952	-0.0327252	0.091345	1.52444	1.1205	0.172831	2.48727	0.091345	0.251131	32000000000	21130000000		1221000000	0	31660000000		18860000000	18930000000											0.35384	0.040286	-0.194598	-0.61291	0.080465	C38	1.1205	0.597952	0.086435	0.197509	0.098711	1.49342	0.086806	2	49077	2	59654
0	0	0	1.29102	0.57805	-0.0177527	0.109704	1.29102	0.848109	0.213175	2.36995	0.109704	0.277785	42000000000	28020000000		1552000000	0	42050000000		25190000000	25670000000											0.328401	-0.427485	-0.396193	1.40359	-0.040556	C38	1.1123	0.610437	0.107179	0.246799	0.059579	1.77293	0.185352	2	100509	2	98676
0	0	0	0.695622	0.57753	0.0074444	0.089385	0.695622	1.21414	0	2.36703	0.089385	0.218626	60000000000	39980000000		1810000000	0	59550000000		32930000000	34390000000											0.416039	-0.133901	-0.203136	-0.145353	-0.433989	C38	1.21414	0.57753	0.093911	0.180497	0.061302	1.56352	0.183357	2	102286	2	66497
0	0	0	0.712549	0.570511	-0.0692837	0.064814	0.712549	1.36269	0.251769	2.32835	0.064814	0.136714	6300000000	4476000000		308400000		6272000000		2956000000	3621000000											0.385123	-3.17237	-3.01247	-4.30792	-0.190163	C35	1.51422	0.577239	0.071716	0.12898	0.085052	1.47763	0.168895	2	60126	3	9419	1900
0	0	0	1.47703	0.570544	-0.0645418	0.109542	1.47703	1.36234	0.381571	2.32853	0.109542	0.256657	9600000000	6881000000		399700000	0	9565000000		5051000000	5457000000											0.524942	0.512929	0.486877	0.356465	0.257331	C35	1.36234	0.570544	0.094475	0.211169	0.099392	1.06459	0.159692	2	55250	3	9909	1842
0	0	0	1.29368	0.544765	-0.0515375	0.110001	1.29368	1.48922	0.528305	2.19667	0.110001	0.246375	19000000000	13700000000		549600000	0	18590000000		9199000000	10130000000											0.944033	-0.175072	-0.192626	-0.234094	0.005925	C35	1.48922	0.544765	0.084226	0.182966	0.091334	0.826361	0.166074		72185		12351	1875
0	0	0	0.577178	0.589365	-0.0455516	0.064143	0.577178	1.69242	0.334382	2.43525	0.064143	0.148929	23000000000	15700000000		730400000	800000	22750000000		9276000000	13410000000											0.223524	-0.298184	-0.368002	-0.480086	0.024602	C35	1.69242	0.589365	0.062808	0.141936	0.126676	0.785813	0.160472	2	116418	2	13362	1944
0	0	0	0.498747	0.586932	-0.0457927	0.0123	0.498747	1.75615	0.427511	2.42091	0.0123	0.029865	23000000000	14570000000	0	812800000	4.81695e+06	22580000000	0	8298000000	13260000000											-0.007358	-3.51311	-3.80786	50.3648	0.040721	C35	1.75615	0.586932	0.020913	0.029887	0.171036	0.559233	0.175307	2	105387	3	13325	2053
0	0	0	0.322659	0.577607	-0.0463746	0.014824	0.322659	2.10755	0.600206	2.36747	0.014824	0.035492	22000000000	14670000000	0	828500000	0	22180000000	0	6959000000	12810000000											-0.01789	1.31948	-0.363989	-1.66154	0.255041	C35	2.10755	0.577607	0.024728	0.035416	0.221452	0.567392	0.215367	2	105271	3	12269	2110
1	0	0	0.680493	0.561288	-0.0483591	0.008988	0.680493	2.0034	0.540269	2.2794	0.008988	0.020888	21000000000	14510000000	0	693800000	1.47532e+06	20800000000	0	7244000000	11680000000											-0.078291	-0.097424	-0.038721	7.27761	0.089243	C35	2.0034	0.561288	0.017667	0.021166	0.337035	0.49483	0.349139	2	103333	3	10657	2142
1	0	0	0.457617	0.563075	-0.0489604	0.001008	0.457617	1.84091	0.570937	2.28872	0.001008	0.002303	20000000000	13740000000	0	650200000	46925690	20380000000	0	7464000000	11480000000											-0.02007	-0.97928	-0.599338	-0.380354	0.182831	C35	1.84091	0.563075	0.009732	0.002331	0.473386	0.326515	0.595278	2	94785	3	8647	2339
1	0	0	0.399605	0.570183	-0.0486728	0.002322	0.399605	1.45412	0.514263	2.32657	0.002322	0.005359	21000000000	13260000000		681700000	50770539	20580000000		9119000000	11740000000	7005000000	7005000000	7043000000	5263000000	724300000	682000000	102200000	118000000	70467511	47569603	0.009796	-5.12497	47.057	1.18074	0.414874	C35	1.45412	0.570183	0.007274	0.005377	0.373858	0.34033	0.596995	2	78319	3	7976	2528
1	0	0	0.443175	0.579048	-0.0471261	0.015257	0.443175	1.32404	0.34862	2.37557	0.015257	0.035877	22000000000	14320000000		667600000	62298271	21660000000		10820000000	12540000000	11260000000	11260000000	10920000000	8685000000	1043000000	834700000	50954145	457700000	135400000	322200000	0.052174	0.231632	0.034783	0.047916	0.182822	C35	1.32404	0.579048	0.017232	0.035346	0.249031	0.520094	0.295904	2	83111	3	8420	2476
0	0	0	4.64483	0.295416	-0.0769758	0.060388	4.64483	2.09596	0.980193	1.41928	0.060388	0.0938	930000000	575500000		143100000	0	931300000		274600000	275100000											-0.083686	0.227658	0.281309	0.054593	0.566096	C13	2.09596	0.295416	0.059456	0.089621	0.033756	1.168	0.23575	2	80901	3	985	124
0	0	0	3.87428	0.27863	-0.076887	0.062719	3.87428	2.1409	1.51092	1.38625	0.062719	0.087934	990000000	591700000		139500000	0	993000000		276400000	276700000											0.066219	-0.229034	0.104828	0.216716	0.553112	C13	2.1409	0.27863	0.0575	0.084244	0.026606	1.24527	0.324338		68066		950	93
0	0	0	3.34265	0.291967	-0.0767224	0.066765	3.34265	2.16817	1.54681	1.41236	0.066765	0.093464	1100000000	697100000		136000000	0	1107000000		321500000	323300000											0.115074	-0.130959	-0.229702	-0.84004	0.123285	C13	2.16818	0.291967	0.058313	0.089431	0.011615	1.2533	0.252509	2	58496	2	971	99
0	0	0	3.29308	0.298454	-0.076581	0.053373	3.29308	1.88683	1.22381	1.42542	0.053373	0.075743	1200000000	675300000	0	132500000	0	1205000000	0	357900000	359800000											0.0887	-0.270423	-0.054736	-0.375791	0.477055	C13	1.88683	0.298454	0.044423	0.07298	0.01888	1.30182	0.313767	2	59709	2	992	0
0	0	0	2.96697	0.293831	-0.0764383	0.063961	2.96697	1.79965	1.11925	1.41609	0.063961	0.090861	1300000000	686800000	0	129700000	0	1305000000	0	381700000	383300000											0.082165	0.054501	0.159812	-0.141087	0.284947	C13	1.79965	0.293831	0.058325	0.087136	0.019875	1.41488	0.289298	2	52578	2	1028	0
1	0	0	3.57897	0.270361	-0.0761958	0.110527	3.57897	2.49991	1.94677	1.37054	0.110527	0.153805	1500000000	902400000	0	118700000	0	1473000000	0	361000000	398200000											0.129093	2.84393	2.41692	2.54204	-0.007228	C13	2.49991	0.270361	0.097463	0.142822	0.01201	1.27376	0.233839	1	48088	2	1283	347
1	0	0	4.85608	0.208073	-0.0762273	0.050888	4.85608	2.90113	2.28176	1.26274	0.050888	0.06691	1500000000	867100000	0	116100000	0	1451000000	0	298900000	301900000											-0.014874	-0.717792	-0.702488	-0.882812	-0.106146	C13	2.90113	0.208073	0.041552	0.064744	0.009796	1.32812	0.300264	1	45322	2	916	226
1	0	0	4.33787	0.214726	-0.07603	0.070819	4.33787	2.97355	1.29221	1.27344	0.070819	0.089821	1600000000	1004000000		113000000		1588000000		337500000	341000000	2067000000	2067000000	1935000000	1780000000	78591126	78515446	-6.92846e+06	147600000	39997007	107600000	0.085097	-0.197565	-0.149881	-0.188389	0.313949	C13	2.97355	0.214726	0.063402	0.086294	0.009705	1.30192	0.270964	2	40199	2	902	228
1	0	0	1.93734	0.291799	-0.0753747	0.085863	1.93734	2.46289	1.91293	1.41203	0.085863	0.115733	2000000000	1462000000		109300000		2043000000		593600000	596200000	2306000000	2306000000	2168000000	1999000000	89750536	85045595	-14331721	197700000	41850169	155900000	0.286526	0.241548	0.208288	0.217613	0.962968	C13	2.46289	0.291799	0.069287	0.10774	0.053309	1.12864	0.211643	2	39700	2	902	264
0	0	0	0.510665	0.269732	-0.0744004	0.051156	0.510665	1.35326	0.401043	1.36936	0.051156	0.079605	2700000000	1184000000		103800000	0	2720000000		903200000	980700000											0.052938	-0.08701	-0.390708	-0.786287	-0.216383	C34	1.31046	0.360596	0.053326	0.077995	0.288798	0.556487	0.006023	2	41994	3	1120	0
0	0	0	1.05806	0.257485	-0.0744196	0.032333	1.05806	1.4515	0.561804	1.34677	0.032333	0.049895	2700000000	1195000000		101600000	0	2706000000		855000000	929200000											-0.004904	-1.40071	-1.23306	-1.70718	0.201909	C34	1.3972	0.343341	0.035516	0.04936	0.305044	0.515297	0.086357	2	43790	3	1159	0
0	0	0	1.22208	0.375602	-0.0741228	0.039009	1.22208	1.35387	0.500115	1.60154	0.039009	0.060958	2900000000	1331000000		174300000	0	2912000000		983300000	1094000000											0.076153	-1.19527	-1.08076	-1.46993	-0.023863	C34	1.35387	0.375602	0.038852	0.060265	0.26143	0.513507	0.113078		36498		1161	0
0	0	0	0.746009	0.305502	-0.0739193	0.031331	0.746009	1.51856	0.839521	1.43989	0.031331	0.051006	3100000000	1589000000		168800000	0	3054000000		1123000000	1207000000											0.04851	-2.33303	-1.56019	-2.11917	-0.119066	C34	1.41576	0.395404	0.031211	0.050622	0.189063	0.61017	0.282639		35605		1306	0
0	0	0	0.699015	0.349769	-0.074087	0.042079	0.699015	1.4481	0.551137	1.53791	0.042079	0.067115	2900000000	1382000000	0	165800000	0	2937000000	0	954100000	1027000000											-0.038141	-0.01644	-0.13495	-0.440304	-0.125816	C34	1.4481	0.349769	0.041469	0.065997	0.23145	0.518175	0.054323	1	45201	2	2133	0
0	0	0	1.02795	0.322938	-0.0740435	0.053843	1.02795	1.4615	0.563378	1.47697	0.053843	0.081124	3000000000	1303000000	0	155200000	0	2967000000	0	891700000	958300000											0.010282	0.81158	1.06854	-0.16744	-0.125787	C34	1.4615	0.322938	0.051604	0.079121	0.240744	0.517528	0.139563	2	33548	2	2126
1	0	0	1.09578	0.324261	-0.0739189	0.038038	1.09578	1.42697	0.507263	1.47986	0.038038	0.056237	3100000000	1338000000	0	153900000	0	3054000000	0	937500000	990300000											0.029164	-0.341766	-0.24569	-0.540816	-0.31386	C34	1.42697	0.324261	0.035497	0.055493	0.307832	0.466846	0.076369	2	38396	2	2030	0
1	0	0	1.3673	0.335244	-0.0724376	0.036773	1.3673	1.0945	0.182395	1.50431	0.036773	0.05493	4100000000	1331000000	0	158400000	0	4082000000	0	1216000000	1369000000											0.336802	-0.056818	-0.143518	-0.222025	-0.151194	C34	1.0945	0.335244	0.032173	0.04835	0.417677	0.393758	0.034812	2	31566	2	1872	0
1	0	0	1.14552	0.334328	-0.07114	0.040134	1.14552	1.51664	0.477586	1.50224	0.040134	0.060329	5000000000	2082000000		154700000		4984000000		1373000000	1666000000	1779000000	1779000000	1781000000	1459000000	81557029	201000000	4.59543e+06	188200000	6.24899e+06	181900000	0.220701	-0.249197	-0.189058	1.25956	0.121505	C34	1.51664	0.334328	0.037428	0.054841	0.426554	0.357077	0.033208	2	36246	2	1876	0
1	0	0	0.715045	0.378105	-0.0702239	0.038584	0.715045	1.26368	0.203394	1.60799	0.038584	0.060056	5600000000	2266000000		143900000		5620000000		1793000000	2125000000	2080000000	2080000000	2046000000	1644000000	113400000	231300000	10855837	218500000	13917743	204600000	0.102754	0.175147	0.354299	0.452463	0.335318	C34	1.26368	0.378105	0.038332	0.058531	0.498268	0.370081	0.063704	2	44696	2	1726	0
0	1	0	0.265712	0.513966	-0.0707332	-0.013861	0.265712	0.934422	0.042913	2.05747	-0.013861	-0.041727	5300000000	1204000000		66601435	0	5266000000		2007000000	3700000000											0.14451	-0.964358	-1.03337	-0.995556	-0.15544	D44	0.600176	0.702541	0.023458	-0.043658	0.173917	0.533828	0.094533	2	20481	3	793	4
0	1	0	0.742259	0.642123	-0.0692883	0.07844	0.742259	0.282159	0.271617	2.79426	0.07844	0.243559	6300000000	1537000000		69987473	0	6269000000		1991000000	4121000000											0.190528	-0.404177	-0.366119	-0.307413	-0.135151	D44	0.772148	0.657278	0.098769	0.21056	0.085453	0.460901	0.239696	2	25796	2	776
0	1	0	0.519878	0.618082	-0.0691841	0.043042	0.519878	0.808876	0.19025	2.61837	0.043042	0.118758	6300000000	1675000000		66495355	0	6342000000		2071000000	3920000000											0.011532	-0.706148	-0.71181	-0.708067	-0.240059	D44	0.808876	0.618082	0.067767	0.112057	0.126297	0.475444	0.26967		27737		760	28
0	1	0	0.34656	0.657995	-0.068965	0.016431	0.34656	0.671369	0.184004	2.92393	0.016431	0.045424	6500000000	1922000000		69314552	0	6494000000		2862000000	4273000000											0.023999	-0.501905	-0.413035	-0.491713	-0.055116	D44	0.671369	0.657995	0.044765	0.04748	0.100094	0.513515	0.395693		27980		1062	36
0	1	0	0.545724	0.6875	-0.0669452	0.040951	0.545724	0.6818	0.262414	3.2	0.040951	0.125687	7900000000	3078000000	0	65206780	0	7896000000	0	4515000000	5429000000											0.215965	0.296894	0.112385	0.070123	-0.038977	D44	0.6818	0.6875	0.063881	0.119405	0.101723	0.398158	0.258044	2	24034	2	1058	23
0	1	0	0.492909	0.67673	-0.0662372	0.045781	0.492909	0.873943	0.366439	3.09339	0.045781	0.143944	8400000000	3362000000	0	61481495	0	8388000000	0	3847000000	5676000000											0.062266	0.172199	0.169271	0.61741	0.542353	D44	0.873943	0.67673	0.067169	0.137469	0.092751	0.391115	0.288563	1	22455	2	1058	27
1	1	1	1.22513	0.535875	-0.0675257	0.099874	1.22513	0.958377	0.593286	2.15459	0.099874	0.256266	7500000000	2282000000	0	73049259	0	7493000000	0	2381000000	4015000000											-0.106671	-0.431555	-0.795015	-0.792747	-0.350569	D44	0.958377	0.535875	0.129052	0.228036	0.043596	0.586464	0.119583	2	28656	2	1147	41
1	1	1	1.01056	0.52846	-0.0662595	0.061811	1.01056	0.753549	0.426617	2.12071	0.061811	0.132064	8400000000	1845000000	0	84706316	0	8372000000	0	2448000000	4424000000											0.117335	-0.013924	-0.050685	-0.097786	-0.191483	D44	0.753549	0.52846	0.077002	0.124201	0.075865	0.265868	0.164237	1	33495	2	1245	46
1	1	1	0.592085	0.541766	-0.0650695	0.022017	0.592085	0.569976	0.308502	2.18229	0.022017	0.047628	9200000000	2136000000		198300000		9199000000		3748000000	4984000000	2965000000	2965000000	2783000000	2392000000	17641051	146700000	171700000	248900000	46528994	202400000	0.001332	-0.030103	-0.11995	-0.003759	0.057565	D44	0.569976	0.541766	0.040673	0.048016	0.105874	0.322371	0.186919	1	31419	3	1227	52
0	0	0	2.22805	0.192692	-0.0770292	-0.046739	2.22805	2.57388	0.837208	1.23869	-0.046739	-0.059837	890000000	301400000		110800000	0	894200000		117100000	172300000											0.009803	14.8552	-12.4775	-17.9239	0.763445	D44	2.57388	0.192692	-0.038925	-0.057614	0.346962	0.232999	-0.176611	2	88066	2	821	2
0	0	0	4.18569	0.189438	-0.0768547	0.048615	4.18569	2.875	1.3288	1.23371	0.048615	0.06009	1000000000	300000000		106100000	0	1015000000		104400000	192400000											0.106021	-3.55213	-2.92924	-3.33263	0.641392	D44	2.875	0.189438	0.049683	0.056398	0.307243	0.197527	0.16089		95032		637	2
0	0	0	2.55852	0.007829	-0.0765358	0.021181	2.55852	17.4645	15.018	1.00789	0.021181	0.026421	1200000000	342700000		101400000	0	1237000000		125200000	254300000											0.218032	-1.18606	-1.19172	-1.18728	0.386092	D44	2.73647	0.205617	0.022453	0.024277	0.313585	0.206904	0.344374		76918		657	2
0	0	0	2.58206	0.18351	-0.076852	0.035435	2.58206	3.54378	1.86907	1.22476	0.035435	0.044053	1000000000	395500000		102000000	0	1017000000		111600000	186700000											-0.177503	-0.151985	-0.026455	-0.090157	0.071543	S90	3.54378	0.18351	0.04235	0.048082	0.358793	0.21031	0.235401	2	65743	2	717	5
0	0	0	2.83054	0.137633	-0.0769245	0.061357	2.83054	4.72152	1.3597	1.1596	0.061357	0.073145	970000000	370500000	0	98209727	363974	966900000	0	78474139	133100000											-0.049478	1.48514	1.54254	1.92859	0.121793	S90	4.72152	0.137633	0.063895	0.073001	0.309551	0.20989	0.178698	2	55007	2	646	2
0	0	0	4.47765	0.187312	-0.076756	0.072969	4.47765	3.22216	0.958741	1.23048	0.072969	0.087272	1100000000	404100000	0	93031879	0	1084000000	0	125400000	203000000											0.120989	0.064459	-0.050603	-0.195182	0.196154	S90	3.22216	0.187312	0.070257	0.084942	0.350428	0.201827	0.225512	2	37984	2	650	9
1	0	0	4.50007	0.213197	-0.0767285	0.042062	4.50007	2.57629	1.32032	1.27097	0.042062	0.052602	1100000000	431700000	0	131600000	0	1103000000	0	167600000	235200000											0.017632	1.6329	1.62593	1.74426	-0.417227	S90	2.57629	0.213197	0.042006	0.052997	0.335588	0.156585	0.347483	2	35788	2	563	9
1	0	0	7.79705	0.36587	-0.0765547	0.046762	7.79705	0.799929	0.337707	1.57696	0.046762	0.066188	1200000000	315700000	0	173700000	0	1224000000	0	394600000	447700000											0.109412	0.082919	-0.143427	-0.176389	0.58837	S90	0.799929	0.36587	0.04558	0.070106	0.307322	0.173459	0.25352	2	36286	2	588	3
1	0	0	3.29127	0.582156	-0.0754995	0.034043	3.29127	0.605632	0.206083	2.39323	0.034043	0.06794	2000000000	480300000		164100000		1956000000		793000000	1139000000	310000000	310000000	275700000	174900000	8.07105e+06	60682589	21588251	61058065	6.92687e+06	54131199	0.598738	0.289562	0.043773	0.15045	0.426241	S90	0.605632	0.582156	0.038703	0.066217	0.303782	0.158468	0.113447	2	32238	2	640	5
1	0	0	1.54751	0.628915	-0.0749519	0.030171	1.54751	0.467114	0.192082	2.6948	0.030171	0.076889	2300000000	522600000		208100000		2337000000		1119000000	1470000000	479100000	479100000	419700000	277300000	8.2512e+06	68499542	49677871	78798358	14035694	64762664	0.194344	1.36182	1.21965	2.02899	1.08259	S90	0.467114	0.628915	0.048976	0.074689	0.310133	0.205057	0.178122	1	35225	2	645	6
0	0	0	0.659545	0.764149	-0.0743071	0.024354	0.659545	1.07539	0.132907	4.23997	0.024354	0.105228	2800000000	2264000000		50019970	0	2784000000		2106000000	2128000000											0.067518	0.453171	-0.026559	-0.511606	0.2205	C38	1.07539	0.764149	0.062303	0.099993	0.308155	1.00462	0.257064	2	54332	3	3500	45
0	0	0	2.50001	0.282801	-0.0746128	0.072182	2.50001	1.63115	0.081144	1.39431	0.072182	0.253459	2600000000	2059000000		36173872	0	2572000000		1687000000	1703000000											-0.076226	1.09871	0.912346	0.502872	0.110798	C38	1.22045	0.662236	0.09872	0.222523	0.271479	1.07022	0.14928	2	32280	3	3605	45
0	0	0	2.92947	0.251391	-0.0748462	0.057546	2.92947	2.05431	0.042048	1.33581	0.057546	0.155809	2400000000	1514000000		3376700	0	2410000000		1425000000	1439000000											-0.06302	-5.43158	-3.98688	-3.46309	-0.154128	C38	1.06278	0.596963	0.07443	0.147584	0.178288	1.17505	0.238517	2	59473	3	3622	33
0	0	0	1.48416	0.150922	�����	1300000	24000000	2.41431	0.029345	1.17775	0.030462	0.070615	2200000000	1380000000		5543142	0	2211000000		1184000000	1189000000																			-0.082618	-3.05413	-9.49473	-19.5537	0.048936	C38	1.16562	0.537735	0.042367	0.068864
0	0	0	1.15752	0.546238	-0.0748361	0.032678	1.15752	1.53081	0.169193	2.2038	0.032678	0.071378	2400000000	1400000000	0	37757141	0	2417000000	0	914500000	1320000000											0.093236	2.0611	1.77115	1.76213	0.105284	C38	1.53081	0.546238	0.042177	0.068946	0.13162	0.816676	0.196619	1	55537	3		17
0	0	0	0.749916	0.497427	-0.0727982	0.05873	0.749916	2.019	0.271796	1.98976	0.05873	0.12142	3800000000	2862000000	0	444800000	0	3832000000	0	1417000000	1906000000											0.58546	4.70034	5.11614	4.12434	0.043212	C38	2.019	0.497427	0.056581	0.095283	0.413301	0.603016	0.187818	1	53545	3	3668	15
1	0	0	1.68836	0.49158	-0.0723184	0.042598	1.68836	1.89774	0.141789	1.96688	0.042598	0.083158	4200000000	3276000000	0	335700000	0	4165000000	0	1726000000	2048000000											0.06627	-0.853619	-0.779756	3.0809	0.319016	C38	1.89774	0.49158	0.046339	0.081181	0.308755	0.991615	0.281872	2	49484	3	4210	5
1	0	0	2.71759	0.367516	-0.0736238	0.070526	2.71759	2.23435	0.281264	1.58107	0.070526	0.125295	3300000000	2611000000		269200000		3259000000		1169000000	1198000000	4338000000	4338000000	4291000000	2926000000	946800000	307800000	25437716	292200000	30403530	261800000	-0.217615	-13.5197	-12.5338	-12.583	0.388173	C38	2.23435	0.367516	0.08814	0.127014	0.284867	1.33128	0.10405	1	37145	2	4120	3
1	0	0	1.67726	0.500873	-0.0720296	0.017477	1.67726	1.57882	0.09108	2.0035	0.017477	0.031426	4400000000	3432000000		263000000		4366000000		2174000000	2187000000	8267000000	8267000000	8291000000	7836000000	241200000	159000000	29614193	94428620	27801381	66627239	0.339684	-40.6995	0.846343	-0.24958	0.37402	C38	1.57882	0.500873	0.022044	0.030575	0.15492	1.89355	0.294417	1	28954	3	1562	0
0	0	0	0.584827	0.511829	-0.0762753	0.023695	0.584827	3.09048	0.884987	2.04846	0.023695	0.039049	1400000000	1236000000		16271602	0	1418000000		399900000	725600000											0.451492	-4.87738	-6.24162	-6.12595	10.2036	D44	3.09048	0.511829	0.022996	0.040989	0.071051	0.251381	0.484184	2	54422	3	614	64
0	0	0	1.52734	0.512337	-0.0763854	0.034797	1.52734	1.88832	0.540671	2.0506	0.034797	0.071316	1300000000	1161000000		15930835	0	1341000000		614700000	687200000											-0.053928	0.217849	0.014397	0.015528	-0.10604	D44	1.88832	0.512337	0.047595	0.073388	0.017033	0.412941	0.440174		54422		548	67
0	0	0	1.30049	0.173224	-0.076557	0.030341	1.30049	1.08464	0.216423	1.20952	0.030341	0.059426	1200000000	907900000		26774905	0	1222000000		494900000	567400000											-0.088824	-6.30024	-7.83244	-34.1534	17.5937	K70	1.8346	0.46429	0.034901	0.059398	0.052977	0.25443	0.332143		41483		648	71
0	0	0	0.777573	0.32607	-0.0763987	0.011473	0.777573	0.975802	0.009548	1.48383	0.011473	0.022566	1300000000	1018000000		26127669	0	1332000000		570700000	688200000											0.089939	-8.07493	-14.231	-12.9758	1.77651	K70	1.78405	0.516649	0.007689	0.022756	0.099166	0.149553	0.430228	1	39317	3	702	78
0	0	0	0.900903	0.613467	-0.0740307	0.061037	0.900903	1.36942	0.04922	2.5871	0.061037	0.14656	3000000000	2440000000	0	14416.8	0	2976000000	0	1782000000	1826000000											0.014156	3.70079	3.38763	3.23254	1.95954	K70	1.36942	0.613467	0.042361	0.11429	0.209635	0.213885	0.311654	2	40276	3	520	84
0	0	0	0.664389	0.595931	-0.0737103	0.04907	0.664389	1.994	0.264689	2.47482	0.04907	0.124034	3200000000	2397000000	0	1.74449e+06	0	3199000000	0	1202000000	1906000000											0.074746	9.84469	8.17609	7.6465	4.37435	K70	1.994	0.595931	0.055431	0.117217	0.249121	0.350866	0.371149	2	36916	3	506	99
1	0	0	1.0473	0.532798	-0.0732919	0.012345	1.0473	2.15189	0.05867	2.1404	0.012345	0.028249	3500000000	3121000000	0	1.42154e+06	0	3489000000	0	1451000000	1859000000											-0.13215	8.97107	-1.60738	-1.2111	-0.445464	K70	2.15189	0.532798	0.021532	0.025324	0.011599	0.150928	0.472505	2	30082	3	457	112
1	0	0	3.4172	0.403374	-0.0749242	0.025342	3.4172	2.278	0.778065	1.67609	0.025342	0.046698	2400000000	2004000000	0	65763278	7.01706e+06	2356000000	0	879900000	950300000	194700000	194700000	300800000	125200000	20393011	60890390	47195212	84718668	13186917	71531750	-0.283799	-1.35137	-1.17226	-1.05369	28.6761	K70	2.278	0.403374	0.050396	0.050891	0.178907	0.082635	0.155655	2	24214	3	387	132
[truncated: 22,382 more rows]
[truncated: 169 more columns]
